# Supplementary material
Source: publisher figshare collection journal article supplement (https://gsajournals.figshare.com/articles/dataset/_/8014703)
Supplement: Supplementary file 1 [file 1]

**Strain:** 000664 - C57BL/6J

**Customer:** Florida State University

**Project #** 105042

| Breeder Pen # | Female Ear Tag # | Female DOB    | Date Mated | Qty of Pups in litter | Litter DOB | Qty. of Females born | Qty. of Females weaned | Qty. of Males born | Qty. of Males weaned | Wean Date | Comments       | Date to Necropsy |
|---------------|------------------|---------------|------------|-----------------------|------------|----------------------|------------------------|--------------------|----------------------|-----------|----------------|------------------|
| H1245202      | 421              | 2-16-16 +/- 3 | 4/8/2016   | 8                     | 4/29/2016  | 4                    | 4                      | 4                  | 4                    | 5/18/2016 | Female Breeder | 6/27/2016        |
| H1245205      | 415              | 2-16-16 +/- 3 | 4/8/2016   | 8                     | 4/30/2016  | 4                    | 4                      | 4                  | 4                    | 5/25/2016 | Female Breeder | 6/27/2016        |
| H1245207      | 4493             | 2-16-16 +/- 3 | 4/8/2016   | 5                     | 4/30/2016  | 3                    | 3                      | 2                  | 2                    | 5/25/2016 | Female Breeder | 6/27/2016        |
| H1245209      | 418              | 2-16-16 +/- 3 | 4/8/2016   | 6                     | 4/27/2016  | 2                    | 2                      | 3                  | 2                    | 5/18/2016 | Female Breeder | 6/27/2016        |
| H1245213      | 424              | 2-16-16 +/- 3 | 4/8/2016   | 4                     | 4/30/2016  | 2                    | 2                      | 2                  | 2                    | 5/25/2016 | Female Breeder | 6/27/2016        |
| H1245214      | 425              | 2-16-16 +/- 3 | 4/8/2016   | 7                     | 4/30/2016  | 3                    | 3                      | 4                  | 4                    | 5/25/2016 | Female Breeder | 6/27/2016        |
| H1245216      | 427              | 2-16-16 +/- 3 | 4/8/2016   | 7                     | 4/29/2016  | 1                    | 1                      | 6                  | 6                    | 5/18/2016 | Female Breeder | 6/27/2016        |
| H1245217      | 414              | 2-16-16 +/- 3 | 4/8/2016   | 5                     | 4/29/2016  | 4                    | 4                      | 1                  | 1                    | 5/18/2016 | Female Breeder | 6/27/2016        |
| L757342       | 413              | 2-16-16 +/- 3 | 4/8/2016   | 6                     | 4/29/2016  | 2                    | 2                      | 4                  | 4                    | 5/18/2016 | Female Breeder | 6/27/2016        |
| Pen #         |                  |               |            |                       |            |                      |                        |                    |                      |           |                |                  |
| S7027792      | 405              | 2-16-16 +/- 3 | NA         | NA                    | NA         | NA                   | NA                     | NA                 | NA                   | NA        | Virgin Female  | 6/27/2016        |
| S7027792      | 409              | 2-16-16 +/- 3 | NA         | NA                    | NA         | NA                   | NA                     | NA                 | NA                   | NA        | Virgin Female  | 6/27/2016        |
| S7027792      | 4486             | 2-16-16 +/- 3 | NA         | NA                    | NA         | NA                   | NA                     | NA                 | NA                   | NA        | Virgin Female  | 6/27/2016        |
| S7027792      | 4487             | 2-16-16 +/- 3 | NA         | NA                    | NA         | NA                   | NA                     | NA                 | NA                   | NA        | Virgin Female  | 6/27/2016        |
| S7027792      | 4488             | 2-16-16 +/- 3 | NA         | NA                    | NA         | NA                   | NA                     | NA                 | NA                   | NA        | Virgin Female  | 6/27/2016        |
| S7027792      | 4489             | 2-16-16 +/- 3 | NA         | NA                    | NA         | NA                   | NA                     | NA                 | NA                   | NA        | Virgin Female  | 6/27/2016        |
| S7027792      | 4490             | 2-16-16 +/- 3 | NA         | NA                    | NA         | NA                   | NA                     | NA                 | NA                   | NA        | Virgin Female  | 6/27/2016        |
| S7027792      | 4491             | 2-16-16 +/- 3 | NA         | NA                    | NA         | NA                   | NA                     | NA                 | NA                   | NA        | Virgin Female  | 6/27/2016        |
