# Supplementary material
Source: publisher figshare collection journal article supplement (https://gsajournals.figshare.com/articles/dataset/_/8014703)
Supplement: Supplementary file 1 [file 1]

## Sheet: Kmeans Cluster Genes
		Cluster	Hypo_P_413	Hypo_P_414	Hypo_P_415	Hypo_P_418	Hypo_P_421	Hypo_P_425	Hypo_P_427	Hypo_P_4493	Hypo_V_405	Hypo_V_409	Hypo_V_4486	Hypo_V_4487	Hypo_V_4488	Hypo_V_4489	Hypo_V_4490	Hypo_V_4491	Amy_P_418	Amy_P_415	Amy_P_414	Amy_P_413	Amy_P_4493	Amy_P_421	Amy_P_425	Amy_P_427	Amy_V_405	Amy_V_409	Amy_V_4486	Amy_V_4489	Amy_V_4488	Amy_V_4490	Amy_V_4491	Hippo_P_413	Hippo_P_414	Hippo_P_415	Hippo_P_418	Hippo_P_421	Hippo_P_425	Hippo_P_427	Hippo_P_4493	Hippo_V_405	Hippo_V_409	Hippo_V_4486	Hippo_V_4487	Hippo_V_4488	Hippo_V_4489	Hippo_V_4491	Ctx_P_413
ENSMUSG00000061808	Ttr	A	-6.12347	-3.40368	-2.55098	-2.72755	-3.60357	-2.07047	-2.54735	-1.79955	-3.67436	-3.77958	-4.62708	-5.74223	-4.50293	-3.36986	-4.90233	-4.03813	-1.2229	0.911734	-1.50129	0.476576	0.397625	0.5685	-1.0408	0.94253	-1.71877	1.06651	-3.18784	1.11566	-0.192087	-2.49231	-0.694935	1.4461	2.7026	1.00782	0.398621	5.44298	7.42466	0.211367	1.08667	0.37348	1.64002	0.903836	7.25422	5.20598	1.81438	1.00949	-0.963788
ENSMUSG00000032446	Eomes	A	-3.36923	-2.48951	-0.938912	-1.3524	-1.20892	-3.36923	-3.36923	-1.46782	-2.05814	-3.36923	-3.36923	-2.22864	-2.96248	-2.42342	-2.65868	-2.60672	-2.12567	-2.22919	-3.36923	-2.23584	-1.99249	-2.66654	-1.51604	-0.941676	-1.70079	-2.59741	-2.2942	-2.97892	-3.04385	-2.33913	-1.53282	0.861649	-0.734647	-1.04378	-1.91091	0.256466	-2.05073	-0.18684	-1.86207	-1.66126	-1.59919	-2.05948	-0.782756	-0.354957	-1.37392	-2.33618	-1.67113
ENSMUSG00000029054	Gabrd	A	-3.84864	-4.19467	-4.77617	-5.67751	-3.25716	-3.66887	-5.68393	-4.83058	-4.13179	-2.90428	-3.10631	-4.76355	-4.53286	-4.85577	-1.84539	-4.45232	0.683639	0.853627	-0.0136935	0.741682	0.453414	-0.466762	0.388236	0.224882	0.617822	0.322026	0.542079	0.416299	0.845946	0.771834	0.31002	0.5336	-0.0827598	-0.470938	-0.434314	-0.241538	-0.370302	-0.642863	-0.0737708	-0.487324	-0.125995	-0.168518	-0.0574016	-0.400235	-0.0948003	-0.293931	1.26484
ENSMUSG00000038255	Neurod2	A	-3.70745	-4.62604	-5.58724	-4.17995	-4.38881	-3.9171	-4.69151	-4.24866	-4.72455	-4.45101	-4.45745	-4.54549	-4.26889	-4.7975	-4.41787	-5.11036	0.909373	0.465508	0.331288	0.66655	0.250064	0.185217	0.579154	0.480863	0.482542	0.295664	0.813502	0.447491	0.679229	0.622883	0.45106	2.0129	1.94554	2.02479	2.12347	1.94708	2.02395	1.6719	2.01511	2.10085	1.97766	2.20565	1.94854	1.6755	2.28134	2.15768	0.786245
ENSMUSG00000096883	Shisa8	A	-1.6475	-2.05102	-2.30797	-0.075822	-0.962054	-4.94635	-1.22267	-0.932713	-1.87486	-2.4584	-1.95101	-2.13415	-1.97558	-1.48642	-2.00478	-1.95279	-1.5438	-0.888864	-1.56016	-0.617247	-1.41791	-1.32629	-1.29424	-2.07925	-0.108557	0.210042	-1.30983	-0.982727	-0.608121	-1.24759	-0.660013	0.0384664	-1.35286	-2.35772	-2.09541	-1.40083	-2.06865	-1.80598	-1.97484	-1.66181	-2.40502	-2.15643	-1.45437	-1.97558	-1.86441	-1.7799	-0.942777
ENSMUSG00000034584	Exph5	A	-1.84639	-2.86235	-2.63977	-2.23723	-2.09893	-2.63065	-2.43785	-2.48032	-2.16786	-2.08983	-1.85128	-2.8616	-2.27708	-2.16175	-2.00696	-2.56965	-0.00724085	0.0955691	-0.260457	-0.369154	0.254155	-0.565745	-0.13917	0.0620789	-0.700027	-0.150756	-0.349715	-0.339586	0.234383	-0.0653995	-0.223463	0.403575	-1.55559	-1.13669	-1.66339	-1.18977	-1.49332	-1.26105	-1.47281	-1.83472	-2.04388	-1.66297	-1.64493	-1.3255	-1.55929	-1.79699	1.1759
ENSMUSG00000078958	Atp6ap1l	A	-2.83012	-2.51435	-3.9366	-3.9366	-2.7591	-1.91268	-3.9366	-3.9366	-2.89532	-3.16328	-2.64208	-2.79602	-2.73323	-2.85832	-1.98654	-2.30932	1.63343	1.88046	1.3883	1.56063	0.776518	0.820552	1.90551	1.15604	1.45682	1.54316	1.86996	1.87047	1.79447	1.75115	1.40668	-1.22395	-2.02289	-1.84578	-1.20715	-1.73394	-1.48185	-1.30162	-1.97485	-1.55528	-0.745065	-1.67264	-1.90129	-0.514458	-2.01048	-0.972908	1.18836
ENSMUSG00000028011	Tdo2	A	-0.844754	-2.29539	-1.23339	-2.65154	-1.28567	-2.65154	-1.43734	-2.65154	-1.61025	-1.87822	-1.53893	-2.65154	-0.801324	-1.23616	-0.701478	-1.39279	-0.206497	-1.80147	-1.11993	0.064517	-2.2517	-0.840019	-1.33358	-2.65154	-0.827045	-2.34608	-2.65154	-2.26123	-1.64294	-0.70072	-0.22634	2.30258	2.52507	2.27157	1.98582	2.47351	1.37651	2.31321	2.50809	1.72387	2.06608	2.635	2.1649	1.86186	2.11062	2.35425	-1.05687
ENSMUSG00000001103	Sebox	A	-2.96619	-2.96619	-1.54804	-2.96619	-2.2605	-1.13604	-2.96619	-2.96619	-2.68926	-2.52832	-2.30519	-1.58421	-2.24252	-1.55082	-2.96619	-2.20368	-1.35656	-0.892257	-2.96619	-2.12155	-1.77877	-1.15467	-2.96619	-2.96619	-1.90313	-1.69426	-2.16889	-1.6138	-2.15146	-1.76287	-1.77362	1.86943	2.02346	1.72453	2.07164	2.09685	1.68295	1.85966	1.96359	1.63775	1.55718	1.9683	2.01175	1.8897	1.84475	1.59618	0.53534
ENSMUSG00000034765	Dusp5	A	-2.44593	-3.42384	-1.60225	-1.90111	-1.73251	-2.50834	-2.80942	-2.92529	-2.56722	-2.3067	-3.05067	-2.48286	-1.97964	-3.06698	-2.59049	-2.74729	-2.35152	-1.06238	-1.19546	-1.22002	-1.20799	-2.86733	-0.936298	-0.321485	-0.609716	-0.343202	-0.565009	-1.40658	-1.05935	-1.1816	-1.38199	1.02981	0.490911	0.779278	0.80191	0.468387	0.6899	0.233084	0.589609	0.801144	0.64395	0.691216	0.540806	0.512313	0.615464	0.374459	-0.247843
ENSMUSG00000070720	Tmem200b	A	-3.20778	-1.5848	-1.69416	-1.29754	-2.23858	-0.981136	-1.13312	-2.0527	-1.38753	-1.36621	-1.75744	-1.13879	-1.88414	-1.73414	-1.5726	-2.01517	-0.824244	-0.71571	-1.02889	-0.780222	-0.691425	-0.291295	-1.16281	-2.6353	0.185788	-0.641904	-1.95002	-0.727632	-0.232601	-0.0357691	-1.44458	0.344113	-1.33402	-1.85393	-1.32844	-1.31695	-1.58424	-0.996983	-1.72661	-1.21571	-1.42979	-1.26294	-0.782147	-1.27642	-1.45676	-1.12203	0.982244
ENSMUSG00000057606	Colq	A	0.120865	-1.45537	-2.09693	-2.09693	-2.09693	-0.755833	-1.1041	-2.09693	-1.58777	-1.32361	-1.7289	0.10912	-1.69019	-0.785407	-1.13003	-2.09693	-2.09693	-1.61017	-2.09693	-0.963545	0.268117	-2.09693	-2.09693	-2.09693	-2.09693	-1.79148	-1.64389	-2.09693	-0.764689	-2.09693	-1.27208	0.287666	-1.23771	-1.28769	-0.202048	-0.958714	-1.0125	-2.09693	-0.729965	-0.388963	-0.204754	-0.787188	-1.53447	-0.959481	-0.778756	-0.890337	0.52667
381232	NA	A	-3.37409	-2.49437	-3.10021	-3.37409	-2.97852	-3.37409	-2.64286	-3.37409	-3.09716	-1.90264	-3.00606	-2.88705	-2.96734	-2.42828	-2.40719	-3.37409	1.00674	-1.44466	0.797422	0.274307	0.113857	0.980181	0.320235	-0.305262	-0.205993	0.302903	0.569643	0.269174	-0.110806	1.22213	0.570647	1.04837	1.36598	1.12196	0.787488	1.0467	1.26427	1.60265	1.1231	0.834454	1.49996	1.03755	0.900647	1.46376	1.13956	1.39617	-0.381566
ENSMUSG00000030351	Tspan11	A	-1.52501	-1.38799	-1.26401	-1.45675	-0.51582	-0.669169	-1.63245	-3.24613	-1.89589	-1.54485	-1.18649	-1.47112	-1.64847	-0.598914	-1.0702	-1.72871	-0.548837	-0.986358	-1.29527	-0.237307	-0.198566	-0.860182	-1.48164	0.0888751	-1.11522	-0.454963	-1.03764	-0.503264	-0.179707	-2.65836	-1.60536	-0.0354671	-1.80857	-1.37262	-1.11941	-1.71339	-0.588161	-2.23822	-1.63617	-2.19974	-1.19023	-2.15222	-1.21461	-1.60533	-1.64472	-1.29563	0.850896
ENSMUSG00000020096	Tbata	A	-1.86727	-3.25259	-3.01741	-3.54139	-2.52828	-1.87022	-2.48807	-2.58782	-3.38498	-2.84884	-2.29286	-2.30542	-3.17047	-2.20571	-3.49556	-2.26686	0.533281	-0.597184	-0.26811	-0.156975	0.416366	0.320823	0.0654392	-1.32678	-1.05157	-0.164913	0.181703	-0.663304	-0.556771	-0.518487	-0.101708	1.21662	1.50473	1.39554	1.60044	0.911035	1.1957	1.66422	1.44506	1.22194	1.1344	1.40793	1.31521	1.73803	1.49421	1.78461	-0.450963
ENSMUSG00000068323	Slc4a5	A	-0.98231	-1.80508	-1.10273	-1.80508	-1.09939	-1.80508	-1.80508	-1.80508	-1.52816	-1.36722	-1.43705	-1.80508	-0.24234	-1.80508	-0.838186	-1.80508	-1.80508	0.40019	-1.80508	0.115349	0.728583	-1.1024	-1.80508	0.0969393	-0.742028	0.132146	0.177271	-0.138464	-0.334716	-1.80508	-1.80508	0.806281	1.36127	0.722107	-0.975776	3.44665	5.28265	-1.47099	-0.0528018	-1.80508	0.492769	0.520981	5.06649	3.43666	0.599226	0.455836	-0.719415
ENSMUSG00000053965	Pde5a	A	-2.02958	-2.26327	-1.91562	-1.84506	-2.64149	-2.19192	-2.76869	-1.49923	-2.20917	-2.30268	-1.82442	-2.27945	-2.28722	-1.30747	-1.56927	-1.48744	-1.16885	-0.680887	-1.42456	-0.518948	-0.27357	-0.0558712	-0.377115	-0.672489	-0.986433	-1.2899	-0.980235	-1.18838	-0.56913	-0.613128	-0.945138	0.660697	-0.0249905	0.194672	-0.347944	-0.0594525	-0.223883	-0.215213	-0.234805	-0.484595	-0.480339	-0.133404	0.20726	-0.396658	-0.517286	-0.589984	0.0893636
ENSMUSG00000070867	Trabd2b	A	-1.8871	-3.60941	-2.09563	-1.83652	-3.5066	-1.8446	-2.07742	-2.13219	-2.88603	-2.21277	-2.61616	-2.66642	-4.14879	-1.23025	-3.49892	-2.4999	0.891607	0.193822	-0.23128	0.599117	-0.326789	1.02656	-0.0523113	0.586202	-0.786941	0.0346363	-1.68402	0.212074	0.382636	-0.215387	-0.175328	0.028991	-0.0891061	0.0506453	-0.649587	-0.306429	-0.39412	-0.128427	-0.780262	-0.741804	-0.406954	-0.970912	-0.767224	-0.536276	-0.764623	-0.334259	0.567996
ENSMUSG00000038781	Stap2	A	0.128154	-0.354638	-2.70194	-3.4043	-0.598222	-0.0537083	-1.67738	-1.58654	-0.904653	-1.67969	-1.55017	-1.07785	-1.10907	-1.06072	-0.654159	-0.766621	-1.64144	-0.592954	-1.24499	-1.20857	-0.519263	-0.891698	-2.94667	-3.4043	0.16781	-1.22252	-1.89606	-0.222006	-0.141014	-0.0653168	-0.0458583	0.523734	-0.136914	-1.31347	-0.515041	-0.415225	-0.681236	-0.710029	-0.294407	-0.935971	-1.02064	-0.853521	-0.108487	-1.16559	-0.765697	-0.23785	-0.45305
ENSMUSG00000042834	Nrep	A	-1.20131	-1.31565	-1.50657	-0.985514	-1.53054	-1.24458	-1.51849	-1.42614	-1.26428	-1.36762	-1.20463	-1.02279	-1.1908	-1.18892	-0.988808	-1.06726	-2.08667	-1.32615	-1.63406	-1.59136	-1.38965	-1.74557	-1.2643	-1.66616	-1.48818	-1.7841	-1.34146	-1.49768	-1.29961	-1.71237	-1.63032	0.850762	-0.346343	-0.312241	-0.97393	-0.300146	-0.978841	-0.446371	-0.673476	-0.467662	-0.100499	-0.542274	-0.243973	-0.660506	-0.657568	-0.975044	0.111443
ENSMUSG00000051043	Gprc5c	A	-1.43847	-1.23537	-1.30337	-4.97092	-0.958155	-0.618758	-1.10984	-0.747712	-1.24045	-1.22557	-1.56636	-1.50636	-1.16072	-0.88925	-0.918473	-1.0709	-0.566608	-0.254953	-0.207507	0.117666	-0.348416	-0.0704724	-0.542613	0.423476	0.118396	-0.496956	-1.67019	-0.349687	-0.15997	-0.255448	-1.15196	0.455263	-0.832868	-1.18549	-0.906479	-0.236307	0.417952	-1.10794	-0.0918548	-1.13518	-0.763263	-1.04911	-0.0599923	-0.609245	-0.333075	-0.346037	-0.987684
ENSMUSG00000040372	Gpr63	A	-3.92958	-2.10016	-1.41722	-0.618363	-1.24722	-2.05142	-1.29608	-1.52832	-1.40188	-1.9109	-1.11823	-0.934286	-1.62012	-1.11983	-0.875162	-1.84424	-1.42816	0.0251252	-0.772814	-0.845049	-0.260787	-1.30624	-0.439266	-0.5772	-0.112039	-3.62703	0.156003	-0.947109	-0.68257	-0.987425	-0.633435	1.38243	0.902131	1.1677	1.34613	1.16925	0.917498	0.466229	1.4223	0.941381	0.143301	0.871988	1.373	1.00705	1.31611	1.1808	-0.499935
ENSMUSG00000020431	Adcy1	A	-3.11869	-3.22689	-3.1496	-3.04529	-3.00317	-3.05719	-3.28541	-2.97868	-2.9751	-2.82208	-2.91905	-3.02455	-3.16797	-3.13679	-2.40318	-3.04365	0.336832	0.0492232	0.0912683	-0.0696547	-0.0092062	-0.0425119	0.0505538	0.0510066	-0.788255	-0.218164	-0.325143	-0.136223	0.226063	-0.166871	-0.0547622	1.26718	1.2136	1.11675	0.88578	1.17158	1.09506	0.876588	1.35421	1.13939	1.15284	1.09449	1.21194	0.933983	1.16827	1.19188	0.871766
ENSMUSG00000023232	Serinc2	A	-2.12839	-2.21149	-1.17466	-3.11039	-0.492967	-1.83103	-1.3567	-0.273917	-1.24156	-1.52799	-2.49991	-2.591	-1.52547	-1.7619	-2.13633	-1.87498	-0.824099	-1.311	-2.14773	-1.26654	-2.71178	-1.16054	-3.86117	-0.54267	-1.44046	-1.49297	-2.04161	-2.16487	-1.74393	-1.80712	-1.77272	0.627826	0.417	0.415386	1.03688	0.586037	1.27265	-0.100661	0.596446	0.477084	0.478	0.613016	0.97443	0.67762	0.920633	0.706381	0.583673
ENSMUSG00000020884	Asgr1	A	-3.06964	-2.18992	-0.755814	-3.06964	-0.399966	-0.584133	-0.143535	-3.06964	-1.88716	-1.69352	-1.77512	-1.92906	-2.08627	-0.239103	-1.6961	-1.02212	-0.718167	0.340563	0.31654	1.42139	-0.12355	1.45163	0.624681	1.53132	0.628898	0.633705	-2.6166	0.29775	-0.247575	-0.318634	0.552498	-0.21727	-1.35623	-0.365484	-1.10132	-0.499711	-1.98521	0.0274482	-0.687971	-0.780902	-2.38918	-1.33668	-0.221996	-0.475175	-1.29272	-0.76988	-1.18459
ENSMUSG00000053930	Shisa6	A	-1.4718	-1.65427	-1.6301	-1.24386	-1.31393	-1.21292	-1.53841	-1.27524	-1.43811	-1.53479	-1.47779	-1.50968	-1.38303	-1.45129	-1.06487	-1.43409	-0.0337146	-0.475903	-0.268156	-0.596589	-0.616816	-0.70666	-0.509551	-0.795379	-0.792555	-0.836296	-0.24723	-0.741997	-0.635506	-0.683566	-1.15319	1.74524	1.84317	2.03823	2.05581	2.11578	2.04703	1.75467	2.10664	1.78176	1.54087	1.87804	1.82268	1.89348	2.00543	1.83056	-1.70599
ENSMUSG00000026094	Stk17b	A	-1.3616	-2.44001	-2.19271	-1.93857	-2.00185	-1.69247	-1.42028	-0.771636	-1.35032	-1.65491	-1.25332	-1.75592	-1.22356	-1.23624	-1.2335	-0.963715	-0.357978	-0.827571	-0.95189	-0.380928	-0.0748465	-0.190834	-0.808913	-0.15255	-1.16565	0.452734	-0.965218	-0.989736	-0.290416	-0.738652	-0.589807	0.506987	-0.933628	-1.01014	-0.821972	-0.916315	-0.715741	-0.640437	-0.686881	-0.950253	-0.54821	-0.745297	-0.729617	-0.562212	-1.26434	-1.08276	0.278693
ENSMUSG00000049709	Nlrp10	A	-1.73808	-0.858361	-1.4642	-1.73808	-1.73808	-1.73808	-1.73808	-1.73808	-1.02894	-1.73808	-0.625472	-1.73808	-1.73808	-0.93815	-1.3395	-1.73808	-1.73808	-1.73808	-1.73808	-0.604696	-0.361342	0.692928	-0.654123	0.829287	-0.443845	0.776966	-0.0539201	-1.73808	-1.41271	-1.13299	0.819027	-0.264203	-1.52046	-0.928842	-1.73808	-0.28659	-0.933177	-1.1329	-1.12792	-1.33333	-1.3581	-0.697953	-1.73808	-1.2945	-1.49114	-1.40284	-1.20308
ENSMUSG00000035305	Ror1	A	-2.01001	-0.857256	-1.0872	0.32053	-2.27592	-0.496099	-0.57824	-2.47482	-1.67052	-0.914175	-1.24837	-1.84102	-2.57486	-0.63803	-0.917375	-0.343933	-2.55727	-1.05218	-2.58635	-0.100618	-1.1518	-0.46901	0.387444	0.597268	0.0649452	-0.527339	0.264072	-0.74036	0.162875	-1.03079	-0.863066	1.73713	1.57101	1.43197	0.866427	1.48344	1.38363	1.3972	1.56517	1.37111	1.382	1.37157	1.27525	0.996496	1.23164	1.21966	-1.38694
ENSMUSG00000031883	Car7	A	-1.42041	-2.68104	-2.8058	-2.36939	-2.77973	-2.27248	-2.33571	-3.44414	-2.71776	-2.28434	-2.34347	-3.38755	-3.52989	-2.57389	-2.42644	-2.104	-0.244732	0.321069	-0.815992	-0.43332	-0.300611	-0.9866	-0.430703	-0.279326	0.0149296	-0.717225	-0.27833	-0.242814	-0.433334	0.00818349	-0.192974	0.44575	0.152875	-0.273918	-0.275653	-0.155181	0.0595228	0.250606	0.0871259	0.133941	0.253698	0.27524	0.54591	0.355099	-0.0255174	0.429185	0.484879
ENSMUSG00000026622	Nek2	A	-1.60669	-1.2076	-1.52104	-2.2561	-0.662277	-0.846444	-2.11776	-1.07254	-1.6922	-0.672256	-0.76148	-1.25726	-1.61833	-0.702684	-1.64154	-0.615731	-0.980479	0.0782517	-0.663362	-0.802153	0.57992	0.324462	-0.383528	0.878995	-0.2854	-1.15018	0.427561	0.119785	0.143077	0.504731	-0.125964	0.553327	-0.391741	-0.0800943	-1.04384	-1.21547	-0.382743	0.214498	-0.746741	-0.429464	0.0383718	-0.299219	-1.21508	-1.78605	-0.250014	-0.604237	-0.998386
ENSMUSG00000021469	Msx2	A	-2.33363	-1.07058	-1.82967	-2.33363	-2.33363	-2.33363	-0.344401	0.80164	-1.82447	-0.393728	-0.877592	-0.744907	-1.13026	-1.38782	-1.62309	-0.552261	-0.895461	0.103117	0.334959	0.0931705	-0.639631	0.648735	-1.52911	0.8699	-0.368331	0.800863	-1.53633	-0.190439	-0.233037	-0.975665	0.285166	-0.54942	-0.939608	-0.74574	-0.684573	-1.11049	0.544062	-0.708519	-0.966667	-0.250053	-1.00788	-0.428025	-1.05246	0.0777142	-0.148695	-0.378533	-1.24796
ENSMUSG00000028584	Lrrc38	A	-0.934116	-1.03783	-1.66952	-3.56392	-1.62313	-0.287502	-1.07325	-1.24245	-0.289501	-1.07597	-0.677763	-1.12636	-1.36775	-1.64599	-0.622357	-1.39972	-0.415809	-2.42388	-2.60375	-2.19006	-1.03025	-1.2194	-1.43975	-0.592438	-0.958985	-2.7921	-1.12375	-1.8973	-1.9675	-1.6131	-1.28392	0.160894	-0.0711618	-0.35055	-0.834469	-0.52715	-0.513676	-0.81271	-0.498704	-0.935914	-1.09928	-1.01315	0.0454217	-1.18549	-1.15961	-1.15354	1.02827
ENSMUSG00000036816	Atoh7	A	0.546613	-0.561694	-0.232907	-2.12731	0.223472	-2.12731	-1.39608	-0.225909	-1.85039	-0.751188	-1.75928	-1.27681	-1.40364	-1.32738	-1.72873	-1.3648	-2.12731	-0.98727	-0.762232	-0.547385	-1.41474	-0.315793	-0.809357	-2.12731	0.388837	0.0544656	-0.61908	-0.202815	-0.207825	-1.79327	-1.10692	-0.252903	-0.0940108	-0.954945	-1.87126	-1.17559	-0.35001	-0.27698	-1.28764	-1.14797	-0.986331	-1.24359	0.209742	-0.467454	-0.516816	-1.18956	-0.332711
ENSMUSG00000030102	Itpr1	A	-2.26345	-2.10389	-2.15076	-1.8978	-1.91144	-1.90935	-1.96268	-2.11893	-2.1805	-1.92629	-1.91507	-2.02546	-1.90231	-1.97778	-1.90613	-2.11036	-0.333029	-0.0617284	-0.450979	-0.382965	-0.249583	-0.832743	-0.0800744	-0.298035	-0.610315	-0.373079	-0.30388	-0.45199	-0.0324205	-0.433639	-0.426495	0.545508	-0.00878363	-0.3376	-0.179749	-0.205002	-0.0601296	-0.407644	-0.100577	-0.119137	-0.0971086	-0.29347	-0.135206	-0.183702	-0.227898	-0.210147	0.28737
ENSMUSG00000058626	Capn11	A	-1.46906	1.22583	-0.0193046	-0.602992	-2.1544	-0.265725	1.87398	1.47194	1.91011	0.890379	-0.0967947	-2.54627	-1.49068	0.209816	-1.23928	0.742422	-1.24181	0.737121	1.43103	-2.31299	1.09487	-2.01043	1.05496	2.95439	1.9151	0.555097	-0.0081584	0.538754	-3.68685	-2.32888	0.936955	-1.99885	0.673322	0.8092	-0.586862	-2.03826	0.862255	2.04424	0.776313	1.50788	1.03077	0.313241	-1.21971	-1.92139	-0.100136	0.316849	-2.94406
ENSMUSG00000079436	Kcnj13	A	-3.0391	-2.39755	-2.53514	-3.0391	-2.07831	-0.0112332	-2.04627	-1.73278	-1.99782	-2.42378	-1.43782	-1.89852	-2.05574	0.239916	-3.0391	-3.0391	0.266986	0.983182	0.210325	1.47723	0.407179	2.17358	0.812707	1.56186	0.345093	1.09072	-2.24181	0.895497	0.402723	-0.822632	1.04338	-1.56523	0.0465408	0.00915147	-0.112519	2.0637	4.24638	-0.233108	0.0261148	-0.0754431	-0.74125	-0.249188	4.04763	1.89248	0.0428355	-0.944934	0.0706001
228767	NA	A	-1.82028	-1.46413	-1.82028	0.292055	-1.11459	-1.82028	-1.40883	-1.82028	-0.6378	-1.04696	-0.364241	-1.82028	-0.257537	-0.217255	0.00578607	-0.561537	-1.82028	-1.33352	-1.42502	-1.33701	-1.42044	-0.143856	-1.36265	-0.276212	-1.82028	-1.82028	-1.36724	-0.0189684	-1.22958	-0.19533	-1.82028	-0.132283	0.0297065	-0.00978738	-0.581826	-1.08279	-0.868853	-1.48619	-0.980614	-0.840935	0.477572	-1.11201	-0.688053	-0.334918	-0.614379	-1.64295	0.064772
ENSMUSG00000026950	Neb	A	-1.06022	-1.48952	-0.892418	-0.969816	-2.01327	-0.850826	-1.47691	0.119822	-1.31375	-1.65331	-0.907534	-1.09701	-0.932904	-0.992934	-1.39142	-1.55573	-1.43296	0.124794	-0.760867	-1.04605	-1.21099	-0.981321	-1.32353	-0.693077	-0.838435	-2.16718	-0.971224	-0.994146	-0.830126	-1.21969	-0.8089	0.237523	0.0996128	0.224098	0.080017	-0.363842	-0.0294498	-0.632066	-0.179749	0.103456	-0.187008	-0.714251	-0.227942	-0.0150352	-0.277822	-0.378206	-0.394915
ENSMUSG00000047419	Cmya5	A	-2.68257	-3.75541	-1.97722	-2.82266	-1.79411	-1.72392	-2.73506	-0.984657	-1.56507	-1.82299	-2.34138	-2.90933	-2.74968	-2.16766	-2.31012	-2.37303	-0.259888	-0.388794	-0.642962	-0.598721	-1.0225	-0.891526	-0.223794	-0.305133	-0.197608	0.207959	0.48625	-0.638041	-0.223129	-1.0564	-0.308902	0.548927	0.25012	0.273303	-0.0224186	-0.0551199	0.0916112	0.25196	0.298738	0.417659	-0.0106126	-0.0190342	0.105336	0.327133	-0.159005	0.136627	0.742908
ENSMUSG00000000303	Cdh1	A	-3.18599	-1.76374	-1.29159	-3.18599	-0.589679	0.0904273	-0.974885	-3.18599	-2.14471	-0.698043	-1.45276	-1.25584	-1.79178	0.911376	-1.49558	-1.73124	0.655601	0.972202	0.110475	1.54009	0.0804565	1.46706	0.234261	-0.318897	-0.0773898	1.36255	-0.561913	0.457268	1.41541	-1.05275	-0.760796	-0.801397	-1.21125	-0.374872	-1.29111	-1.16116	-0.422693	0.0372219	-0.422439	-0.557985	-0.0929089	-1.36413	-0.291342	0.40368	-1.25987	-0.925073	-0.277239
319463	NA	A	-2.47035	-2.39554	-3.9008	-1.6187	-3.1154	-3.10019	-2.3097	-2.10841	-2.96465	-2.69522	-2.82555	-3.17099	-3.51554	-2.67171	-2.83118	-3.15711	1.28677	0.850544	0.612206	0.547613	0.423769	0.672338	0.859158	0.868931	0.79116	0.26056	0.520053	0.591677	0.276709	0.794276	0.503169	0.616132	0.675579	0.447437	0.800939	0.326665	0.663091	0.614128	0.459561	0.695625	0.934115	0.621949	0.32925	0.73577	0.665805	0.949164	1.08259
ENSMUSG00000043088	Il17re	A	-1.86648	-1.86648	-1.59261	-1.86648	-1.47091	-0.850491	-1.86648	-1.86648	-0.981732	-0.395034	-1.49845	-0.484497	-1.45974	-0.263456	-1.15594	-1.86648	-1.86648	-0.726441	0.651478	0.198151	-0.679066	0.0685549	-0.782525	-1.86648	-0.803426	-1.30908	0.115873	-0.514087	0.146399	-1.86648	-0.254388	0.172983	-1.14293	-0.27859	-0.751949	-0.0445147	0.974079	0.0845136	-0.828855	0.422257	-0.540729	-0.685258	0.600663	-0.986822	-0.66058	-0.928728	-0.503982
ENSMUSG00000024650	Slc22a6	A	-2.91285	-2.25958	-2.66478	-2.72358	-2.95633	-0.478822	-1.71201	-1.89784	-2.08548	-2.63304	-2.67246	-2.70796	-2.34289	0.43248	-3.26457	-2.71754	1.06097	2.17127	0.945705	2.27801	0.562282	2.24495	1.0867	2.09879	1.55685	1.84834	-0.329591	1.61327	2.32726	0.846367	1.03094	-1.26896	-1.12464	-0.0947516	-0.71428	-0.419646	-1.14349	0.226961	-0.282132	-0.835477	-0.55317	-1.3345	-1.45139	0.321561	-1.0514	-1.0706	0.71789
ENSMUSG00000061878	Sphk1	A	-2.19219	-2.43336	-2.10457	-2.19454	-2.18188	-2.16883	-1.42598	-3.29293	-2.81649	-1.9939	-2.70446	-2.06882	-2.02399	-0.335513	-2.81447	-1.72683	1.09567	1.04993	1.1189	1.52345	0.264329	1.66137	1.14433	0.85508	1.49087	1.36165	-0.200688	0.727588	1.42716	0.643129	1.24012	-0.793935	-1.52423	-0.95072	-0.965867	-1.05924	-0.765689	0.207283	-1.77093	-0.865973	-0.855824	-1.67291	-1.47093	-0.312004	-1.31776	-1.94969	0.55237
ENSMUSG00000029843	Slc13a4	A	-5.11547	-2.27146	-2.11041	-3.25677	-2.02592	-0.480398	-1.71937	-2.49858	-2.29761	-2.3526	-2.32213	-3.29441	-2.07725	0.414729	-2.20636	-2.37554	0.310866	1.79539	0.652861	2.36888	0.699306	2.06243	0.865149	1.97037	0.942573	1.4898	-0.726403	0.888158	1.60501	0.0466006	1.23704	-1.0715	-0.738559	0.119009	-0.731745	0.566072	1.40083	0.165129	-0.477189	-0.823988	-0.451252	-1.38819	1.51999	0.589644	-0.567785	-1.04971	0.0259063
ENSMUSG00000025739	Gng13	A	-1.41914	-1.52851	-1.62131	-2.48606	-1.00792	-1.69911	-1.46432	-2.18968	-1.56307	-1.51939	-1.70321	-1.74621	-2.10943	-1.67853	-1.70462	-2.15065	-0.054524	-0.162111	-0.232169	0.120057	0.0375007	0.0162525	-0.300789	0.478566	-0.171405	0.167395	-0.614751	-0.0638333	-0.014207	-0.107729	-0.133916	0.0296886	-0.756084	-1.00385	-0.593772	-0.94846	-0.539628	-0.498627	-0.909278	-0.576599	-0.582285	-0.695719	-1.12187	-1.00227	-0.934946	-0.695524	-0.465815
ENSMUSG00000035258	Abi3bp	A	-3.0927	-1.39743	-1.76467	-1.12268	-0.646168	-0.604904	-0.891775	-0.84159	-1.17541	-0.978919	-0.639589	-0.927515	-0.665816	-1.10608	-1.66097	-1.48621	-0.477146	0.733555	-0.181053	-0.241252	-0.0562573	-2.1105	0.457699	0.284979	0.402214	0.399218	0.702326	0.360206	0.333038	0.0232977	0.238978	-0.634691	-1.86959	-1.89396	-2.25339	-1.48146	-1.59229	-1.79029	-2.57976	-1.9135	-1.60997	-2.09871	-1.35478	-1.34624	-1.99211	-2.06183	-0.348966
ENSMUSG00000041845	Rhod	A	-2.45561	-0.759592	0.563703	-2.45561	-0.295304	-1.85996	-0.145168	-0.554204	-0.548351	-0.984159	-0.854322	-0.525449	-1.06139	-0.610192	-1.08207	-2.02455	-0.104132	-0.526179	-0.774712	-1.32222	-2.45561	0.277262	-1.13765	1.05561	-0.244228	-0.200732	0.331566	-0.312413	-1.64088	-0.0858238	-0.843512	-0.199333	-0.974867	-1.13104	-0.806547	-0.295393	0.346841	-1.09749	-0.594793	-0.265803	-0.966082	-0.324507	-0.188279	-0.45568	-0.529486	-1.02249	-0.661006
ENSMUSG00000032179	Bmp5	A	-0.567738	-1.84199	-0.419016	-0.169992	-0.846356	-0.619532	-1.89085	-0.910469	-1.56675	-1.30504	-0.939261	-1.33552	-1.25483	-1.05216	-0.49827	-0.467366	-0.266051	0.806191	-0.5098	0.448758	0.462783	0.138574	-1.11001	-0.410218	0.422332	-0.421661	-2.03001	-1.18054	-0.335531	-0.809877	-1.75867	-0.720444	-0.396728	-0.577848	-0.654346	-1.17808	-0.601963	-0.0986088	-0.72337	-1.39707	-0.995813	-1.28317	-0.120737	-0.297769	-1.40893	-1.60368	-0.708615
ENSMUSG00000031849	Comp	A	-1.97575	-1.09603	-1.97575	-1.97575	-1.97575	-0.145602	-1.97575	-1.97575	-0.546592	-0.701695	-0.86314	-0.835165	-1.25207	-0.28732	-1.2652	-0.717004	-0.73219	-0.206929	-1.27056	0.0888852	-1.97575	-0.16423	-1.17123	1.18426	0.791882	0.41507	-1.97575	0.167445	0.682527	-0.350797	-0.139343	-0.10134	-1.2522	-0.51352	-0.517432	-0.455522	-0.769542	-0.772287	-0.223466	-0.996402	-0.649995	0.350317	-1.19739	-1.29771	0.526888	-0.689628	-0.613248
ENSMUSG00000030137	Tuba8	A	-0.766633	-1.19496	-1.05667	-0.797185	-0.614362	-1.35092	-1.20266	-1.96384	-1.19527	-1.1375	-1.17263	-1.93774	-1.34647	-1.4814	-1.15396	-1.61428	-1.79141	-0.525632	-2.04211	-0.498924	-1.78165	-1.43598	-1.59308	-1.85064	-1.23357	-2.09768	-0.795088	-0.979217	-0.694038	-1.08061	-1.08664	-0.0866742	-0.906545	-0.406888	-0.298974	-0.739378	-0.220414	-0.718742	-0.423608	-0.451917	-1.1221	-0.376378	-0.796122	-0.534195	-0.35483	-0.708513	0.326032
ENSMUSG00000002228	Ppm1j	A	-1.55237	0.135987	-1.10582	0.411085	0.575517	-1.18287	-0.948569	-1.81792	-0.884215	-1.90864	-0.454777	-0.754444	-0.673749	-0.289741	-0.45973	-1.06921	-0.172489	0.367585	-0.992351	0.192091	-0.45577	-0.847537	-0.281266	1.32535	-0.312584	0.489364	-0.412832	-1.57386	-0.604477	0.170099	-0.243961	-0.939056	-1.66475	-2.20116	-1.86164	-1.47598	-0.670127	-1.49375	-2.52396	-1.8035	-1.38298	-2.24743	-1.9615	-1.7416	-1.71929	-1.58621	-1.16146
ENSMUSG00000049107	Ntf3	A	-1.27603	-2.42318	-1.58062	-3.3029	-1.1426	-2.28691	-1.57599	-1.32244	-1.87375	-1.43126	-1.33725	-0.865346	-1.32792	-1.06868	-1.76225	-2.27105	1.48748	0.262068	0.763966	1.0262	0.0562629	0.936233	0.724297	1.06929	-0.786755	-0.787857	0.804163	0.375791	0.138924	0.53378	0.406895	1.57694	1.74471	1.77818	1.89615	1.86026	1.42968	1.52294	1.86731	1.70116	1.7389	1.70921	1.386	1.62868	1.96479	1.54148	-0.846244
ENSMUSG00000013766	Ly6g6e	A	-2.77444	-1.69036	-2.27048	-0.970006	-2.77444	-1.75845	-2.36299	-2.77444	-2.26528	-2.15912	-1.3184	-1.63386	-1.38023	-2.77444	-2.77444	-1.31969	0.257841	-1.00563	-1.59766	-1.01424	-2.06187	-1.24708	-1.2552	-0.585859	-0.00681408	-1.36809	0.0878441	-0.736459	0.526358	0.231776	-0.155646	1.06678	0.697298	-0.0702866	0.747517	1.19641	0.835008	0.637195	0.685259	0.994316	1.11902	0.618929	0.0732011	0.800778	0.856423	1.14447	0.218077
ENSMUSG00000063415	Cyp26b1	A	-3.20075	-1.72968	-2.28125	-1.33972	-1.73423	-2.01633	-1.93021	-1.56725	-1.8916	-1.98279	-2.20783	-2.6489	-2.35043	-0.988517	-2.20627	-2.5181	1.8992	1.71261	1.71938	2.0076	1.97242	1.71292	1.62248	1.0876	2.33437	1.61475	2.38901	1.56714	1.24937	1.61051	1.60816	0.277509	0.196183	0.251484	0.0762533	0.540634	0.231189	0.0345212	0.378042	0.585353	0.00886398	0.538357	0.652162	0.107442	0.56644	0.281698	-0.302184
ENSMUSG00000045314	Sowahb	A	-1.56035	-1.39166	-1.96768	-1.9456	-1.95032	-1.37555	-1.34185	-1.94026	-1.52105	-1.56027	-1.2126	-1.36501	-1.06918	-1.32121	-1.30056	-1.51584	0.0148786	0.179491	-0.688976	-0.0396013	-0.398087	-1.0167	0.199673	-0.121017	-0.357059	-0.92313	-0.526211	-0.475726	0.0315018	-0.325299	-0.0263426	-0.499235	-1.25975	-1.09194	-1.44665	-1.15854	-1.65215	-1.3638	-1.24712	-1.2067	-1.10221	-1.25955	-1.35645	-1.78009	-1.79236	-1.54502	1.61258
19817	NA	A	-2.13517	1.92933	-0.216817	0.408714	0.207647	0.417647	0.423607	-0.114533	0.21603	0.38044	-1.03212	2.36624	1.75064	-0.329424	0.13559	0.568842	-1.32753	-0.686373	-1.19184	-1.54455	-0.546879	-2.49933	-1.13814	-1.67185	-0.476235	-0.933934	-0.926746	0.99558	-0.385402	0.0530932	-0.331625	-0.210255	-2.29789	-1.15627	0.187165	-0.895818	-1.13737	1.16329	-0.707215	0.0393117	-1.85565	-0.467058	-0.0174462	-1.86051	-0.74703	-1.10451	0.745128
ENSMUSG00000025064	Col17a1	A	-2.05418	-0.791128	-1.7803	0.232079	-1.34849	-1.03819	-1.64272	-1.34813	-0.0677468	-1.13847	-0.452894	-0.913597	-0.850811	-1.80898	-1.08728	-0.426895	0.63987	-0.672805	-0.6891	0.0104538	0.891912	-1.3515	-0.200995	-1.18928	0.157199	-0.0307449	-0.213231	-2.05418	-0.457762	0.240983	-0.0236917	-0.580302	-0.850988	-0.591951	-1.58074	-0.468345	1.62002	-0.696066	-1.71708	-1.33371	-1.37372	-0.744437	1.01453	-0.340552	-1.59645	-2.05418	-0.0840114
ENSMUSG00000062785	Kcnc3	A	-0.758174	-1.28585	-1.54281	-1.45792	-1.04017	-1.27132	-1.38332	-1.12422	-1.22326	-1.21019	-1.35071	-1.38831	-1.43357	-1.41268	-1.11744	-1.26607	-0.924136	-1.32901	-1.21166	-1.0885	-1.27646	-1.67128	-1.18843	-1.18192	-0.932723	-1.32324	-0.689325	-1.07821	-1.04698	-1.20001	-1.28377	0.761587	0.31426	0.270313	0.136058	0.215108	0.24242	-0.0689707	0.258533	0.221875	0.00961297	0.301223	0.0581573	-0.0953588	0.364472	0.220834	-0.0949261
ENSMUSG00000063659	Zbtb18	A	-2.60754	-2.47567	-2.3861	-2.51197	-2.46076	-2.15924	-2.33654	-2.18012	-2.32714	-2.51139	-2.2296	-2.311	-2.30623	-2.20276	-2.26776	-2.23754	-0.0178711	-0.0578046	-0.147947	-0.177479	-0.208007	-0.364472	-0.244333	-0.231031	-0.395842	-0.515284	0.224056	-0.318751	-0.0057062	-0.242779	-0.202574	1.26182	1.26188	1.29741	1.17201	1.23278	1.01884	1.11809	1.26555	1.11878	1.09967	1.31893	1.18033	0.938532	1.14086	1.10339	0.574687
ENSMUSG00000000440	Pparg	A	-3.00962	-2.1299	-1.28734	-3.00962	-2.30393	-2.41398	-1.43423	-3.00962	-1.27509	-1.36457	-1.27639	-2.15912	-1.44688	-1.16421	-1.82512	-1.22825	-0.315573	-0.572873	-0.0215772	-0.479823	-0.398502	-0.419804	-0.0611976	-1.33611	-0.916043	-0.22403	-0.780274	-0.866429	0.560664	-0.0509602	0.113642	0.478588	-0.621963	-0.83628	-0.508566	0.118068	-0.370575	0.329573	-0.424411	-0.459248	-1.00484	-0.566833	-0.114972	-0.153718	-0.287017	-0.370001	1.58257
ENSMUSG00000078816	Prkcg	A	-2.17197	-2.32648	-2.71146	-2.43982	-2.13797	-2.49269	-2.74658	-2.4505	-2.60288	-2.3536	-2.4322	-2.49909	-2.82455	-2.723	-2.15247	-2.53323	0.617899	0.738903	0.55738	0.783074	0.378598	0.158254	0.594036	0.542036	0.730274	0.173148	1.17988	0.533952	0.720841	0.710618	0.448123	1.1867	1.15024	1.08985	1.27744	1.19297	1.31778	0.943129	1.23617	1.2135	1.16689	1.23695	1.11983	1.24633	1.18753	1.23984	-0.0120413
ENSMUSG00000025128	Bhlhe22	A	-2.60479	-2.38215	-2.82684	-2.53527	-1.97139	-2.0755	-2.42073	-2.84281	-2.39207	-2.45491	-2.27325	-2.34645	-2.27067	-2.27719	-2.21772	-2.2486	1.2632	0.597739	1.29856	0.978975	0.732267	0.941039	0.670391	0.743656	0.249016	0.783868	1.11889	0.543349	1.02814	1.02509	0.900688	1.11582	1.31636	1.33483	1.19401	1.19233	1.08313	1.19703	1.28568	1.35631	1.30626	1.41908	1.1485	0.969159	1.24792	1.11416	-0.171923
ENSMUSG00000041559	Fmod	A	-3.50224	-2.53097	-1.5895	-1.55842	-1.52229	-0.559839	-1.23127	-1.88634	-2.213	-2.39201	-1.79034	-3.17931	-2.47697	0.507181	-2.08131	-2.15996	0.638281	1.6011	0.665011	2.05249	0.798796	2.23924	0.959906	2.01752	1.69731	1.54048	-0.267338	1.20526	1.75029	0.145856	1.23304	-1.16894	-1.37134	-0.340705	-0.682202	-0.408901	-0.997621	0.333218	-0.682267	-0.551044	-0.891156	-1.13328	-1.55605	0.0294069	-1.3553	-1.65868	0.642069
ENSMUSG00000042978	Sbk1	A	-1.32777	-1.5788	-1.32528	-1.44422	-1.29409	-1.32177	-1.34578	-1.40329	-1.44896	-1.35357	-1.38262	-1.55033	-1.63853	-1.38443	-1.5554	-1.6024	0.0519928	-0.418557	-0.359631	-0.29075	-0.376218	-0.647981	-0.198688	-0.446488	-0.255921	-0.0744195	-0.618373	-0.0454369	-0.342534	-0.41551	-0.49901	0.412702	-0.302583	-0.510716	-0.22265	-0.503169	-0.0693086	-0.494546	-0.39947	-0.162447	-0.267012	-0.447712	-0.532069	-0.306601	-0.280411	-0.357383	-0.375036
ENSMUSG00000033227	Wnt6	A	-0.726695	-0.669424	-0.778787	-2.39138	-2.55831	-0.429336	-1.27477	-3.264	-1.27756	-0.822381	-1.29834	-1.49448	-2.85725	0.559045	-1.31394	-0.547776	1.35629	0.894197	0.362035	1.95361	0.182285	1.8606	0.919563	0.101563	1.10116	1.04813	0.0367313	0.699621	1.42491	-0.62922	0.818483	-0.942136	-2.6902	-0.675374	-0.577422	-1.28727	-1.20227	-1.63888	-1.30225	-1.29509	-1.25922	-0.87839	-0.99667	-1.40013	-1.74452	-3.08666	-0.399025
100504545	NA	A	-0.68381	-1.28844	-2.20672	-1.83807	-0.273333	-2.11504	-0.98377	-2.71069	-1.52821	-1.14983	-1.1094	-1.5701	-0.735707	-0.941632	-0.88462	-2.27963	-1.10106	-1.32931	0.0942836	-0.950484	-1.16661	0.43403	-2.25306	-1.4666	-1.64763	-0.687252	-0.869738	-0.059597	-0.697806	0.198796	-0.285489	0.494353	0.0677709	0.337568	0.287779	-0.241467	0.0123727	-0.494027	0.160584	0.191801	-0.0272392	-0.650906	-0.124217	-0.84682	0.202744	0.517469	-0.442844
ENSMUSG00000000805	Car4	A	-1.90681	-1.55408	-2.12175	-1.80334	-2.51206	-1.59179	-2.44982	-1.81312	-1.97557	-2.44666	-2.24855	-2.00222	-2.12192	-2.06941	-1.64202	-1.59697	-0.835543	-0.272562	-0.332459	-0.346895	-0.441592	-0.06696	-0.509174	0.106578	-0.489106	-0.750719	-0.333063	-0.174187	-0.0807313	-0.0144003	-0.416742	0.336448	0.117094	0.295448	0.467715	0.186162	0.228859	0.123386	0.401802	0.248194	-0.174461	0.342408	0.141347	0.165609	0.476919	0.339579	0.0452695
ENSMUSG00000027168	Pax6	A	-1.25478	-1.0951	-1.33228	-0.800525	-0.802952	-1.312	-1.54387	-1.09487	-1.07095	-0.863725	-0.795227	-0.999895	-1.33755	-1.18723	-0.561433	-0.960953	-0.792208	-0.423128	-0.249959	-0.40628	-0.481957	-0.589862	0.107986	-0.765876	-0.644551	0.147267	-0.542339	-0.361195	-0.457749	-0.533698	-0.586867	0.296171	-0.714137	-0.686431	-0.661219	-0.994486	-0.880671	-0.684075	-0.907731	-0.991443	-0.540369	-1.19886	-0.707821	-0.972521	-0.745021	-0.943469	-0.887106
ENSMUSG00000032548	Slco2a1	A	-1.6016	-1.25763	-0.948209	-1.2135	-0.789481	-1.55455	-1.63669	-3.15897	-1.83925	-0.637584	-0.993087	-2.1099	-1.65215	-1.10099	-1.03994	-1.87586	-0.00549745	0.118133	-1.17145	0.138662	-0.324637	0.12531	0.0829729	0.312932	-0.606544	-0.164589	-0.13134	-0.508638	-0.895579	-1.13058	-0.358896	0.497293	1.1037	0.941472	1.00627	1.27591	0.899842	0.875713	0.997703	0.379681	0.119756	1.08117	0.926925	1.04731	1.26217	0.97742	-0.326201
ENSMUSG00000050503	Fbxl22	A	-2.44077	-1.01852	-1.26808	-1.02828	0.0782533	0.0447393	-0.865375	0.72865	-1.39949	-1.16672	-1.14625	-0.852044	-0.727142	-1.98606	-0.376536	-2.44077	-0.089295	-1.05939	0.154471	-0.376136	0.313798	-0.0962425	0.575788	-1.37385	0.473052	-1.48231	-1.13294	0.279966	-0.0345536	-0.489952	0.23719	-1.36281	-0.727359	-1.43857	-0.0964023	0.0284511	-0.445062	-0.815656	-0.805851	-1.05159	0.0238757	-1.01303	-1.87831	-0.727142	0.0135412	-0.63959	-0.742675
ENSMUSG00000035456	Prdm8	A	-2.22497	-2.14518	-2.702	-2.83403	-1.62793	-1.37103	-2.22143	-2.24452	-2.32622	-2.42688	-2.35519	-2.17259	-2.31621	-2.03724	-2.21415	-2.27074	0.599944	-0.0823855	0.100973	0.350472	0.145192	-0.0145454	0.44249	0.267395	0.301195	0.232855	0.671441	0.133265	0.695489	0.455208	0.186318	1.49514	1.57463	1.77416	1.73749	1.59754	1.53629	1.55917	1.66386	1.59815	1.41689	1.88004	1.54753	1.35623	1.70018	1.56555	0.224768
ENSMUSG00000040310	Alx4	A	-3.25563	-2.17155	-2.22334	-1.70033	-3.25563	-1.64938	-1.15119	-1.72257	-2.07314	-1.78418	-2.59462	-1.87364	-2.05226	-1.26864	-2.28873	-1.62834	-1.35427	1.27238	-0.905877	1.2354	0.625308	0.983511	0.214077	1.09737	0.666724	1.32171	-0.815453	0.491425	1.06444	-0.158748	-0.520835	-0.753194	-0.346346	-0.122451	-0.0607897	0.222379	-0.14175	-0.345934	-0.01947	-0.966886	-0.268208	-0.465709	0.58736	-0.0230522	0.0606684	-0.472033	0.50677
ENSMUSG00000039629	Strip2	A	-0.754898	-1.14063	-0.959943	-0.532468	-0.886266	-1.12445	-1.01636	-0.719389	-0.495943	-0.779579	-0.877391	-0.855738	-0.602172	-0.683964	-0.635416	-0.627127	-1.34484	-0.37047	-1.2184	-0.786194	-0.529726	-1.00749	-0.41467	-1.34123	-0.189072	-0.442203	-0.78609	-0.677448	-0.662167	-0.803032	-1.12895	0.609119	0.0254527	0.156448	0.0649769	0.349355	0.752528	-0.0769885	0.418054	-0.0305558	-0.294811	0.224537	0.861157	0.234519	0.129075	0.184266	-0.994723
ENSMUSG00000059325	Hopx	A	-1.71311	-1.70045	-1.76402	-2.09369	-1.72485	-1.91901	-1.9439	-1.68848	-1.84604	-2.00816	-1.87455	-1.83814	-2.19159	-1.91259	-1.95561	-2.01688	0.218423	-0.493379	0.311661	-0.228699	-0.162422	0.253857	-0.460109	0.344918	-0.880074	0.113535	-0.735309	-0.248122	-0.042674	-0.366112	-0.098151	0.934892	0.506014	0.448002	0.620934	0.493177	0.656972	0.304672	0.570685	0.546565	0.590129	0.478592	0.605587	0.392161	0.646051	0.40582	-0.357596
ENSMUSG00000091636	Akain1	A	-0.987577	-1.44535	-1.25596	-0.675851	-1.07148	-0.991349	-1.73364	-1.34372	-1.07481	-0.991634	-1.3148	-0.717622	-1.38942	-1.08009	-0.713336	-0.766066	-1.74575	-1.38089	-0.937106	-0.879448	-0.951511	-1.37366	-1.56633	-0.634289	-1.26292	-0.744191	-1.55302	-1.70256	-1.34124	-2.11023	-1.30187	0.714913	0.559576	0.809045	0.874895	0.579328	0.541372	0.701544	0.340098	0.542927	0.446216	0.583771	0.306658	0.451647	0.437459	0.438662	-0.309429
ENSMUSG00000026051	1500015O10Rik	A	-0.522742	-0.841744	-0.242064	-1.15006	-1.17763	-0.159898	-0.863326	-2.01218	-1.10845	-0.623162	-0.668279	-2.05433	-0.526768	-0.532527	-1.61025	-0.574773	-0.180989	0.223315	-1.17865	0.424538	0.475555	-1.18379	-0.487893	-0.803816	-1.01478	0.673942	-0.812238	-0.0689264	-0.333713	-0.134973	-0.356265	0.23917	0.373596	0.182426	-0.0960704	2.22603	4.08302	0.502162	0.123383	-0.597711	0.427594	0.14704	3.95902	1.77304	0.488569	0.0323946	-1.10275
ENSMUSG00000046480	Scn4b	A	-0.732228	-1.13128	-1.00971	-1.17779	-1.30158	-0.902267	-0.991979	-0.568537	-0.585397	-0.759066	-0.912525	-0.660595	-0.706974	-0.886648	-0.658847	-0.596094	-1.96532	0.0598695	-2.46049	-1.61356	-0.930356	-2.25902	-0.863783	-1.75151	0.0251117	0.341947	-1.94668	-1.7775	-0.256286	-2.417	-1.9147	-0.0658282	-0.711095	-0.892301	-1.03009	-0.313133	-0.697661	-1.08395	-0.335501	-0.560046	-0.754955	-0.560608	-0.296783	-0.988785	-0.325709	-0.644603	1.46728
ENSMUSG00000053626	Tll1	A	-0.650584	-0.914208	-1.66078	-1.53667	-0.510281	-1.10192	-0.340237	-1.92596	-0.619395	-0.500872	-0.513097	-0.817398	-0.332298	-0.457247	-0.556086	-1.09677	-0.429497	-0.364851	-0.277753	0.245776	-0.739123	-0.634971	0.070513	-2.25033	-0.26333	-1.89362	-0.187909	-0.0964906	-0.506962	-0.218618	-0.275244	0.378411	-0.0849549	0.139385	-0.241363	-0.253771	-0.144793	-0.71269	-0.595768	-0.0602905	-0.269083	-0.327295	0.256306	0.0642254	-0.198079	-0.461697	-1.3763
ENSMUSG00000006014	Prg4	A	-1.78017	-1.35283	-0.31562	-4.49691	-2.96445	0.315115	-1.33976	-2.51644	-2.10948	-0.850227	-0.742513	-1.6045	-2.93416	1.06727	-0.214745	-2.33271	0.508396	1.33039	0.379181	1.66956	1.47937	1.3242	1.21769	1.20117	1.31543	1.64394	-0.0116433	1.24465	2.07848	-0.353308	0.424889	-0.796546	-0.942871	1.05429	-0.351075	-0.709099	-0.105758	-0.136282	-0.544884	-0.214478	-0.490936	-0.701121	-0.630153	-0.077463	-1.18061	-2.44762	0.352818
ENSMUSG00000096768	Gm47283	A	-0.94668	-0.798957	-0.51706	-0.677849	0.198366	-0.282448	-0.687032	-0.293296	3.2308	1.75049	0.0053198	-1.0844	-0.342272	-0.992804	-0.185977	-0.903035	-0.990255	2.64716	-0.510414	-1.70087	-1.28547	-0.352111	-2.04341	-1.79735	0.636357	0.173721	-0.491695	-1.2455	-0.0733091	1.03135	0.712087	-0.5588	-1.15278	-0.337987	-0.641825	-1.32666	-0.10101	0.349831	-0.0462123	2.32913	1.81839	-0.100807	-0.566184	2.34439	-2.20049	2.03184	-1.43994
ENSMUSG00000019312	Grb7	A	-0.591334	-1.14704	-1.12747	-0.528808	-0.024004	-0.241131	-1.44871	-0.481524	-0.675987	-1.04842	-1.57434	-1.79364	-0.880405	-0.682146	-0.295094	-1.72088	-0.0275157	-0.284081	-0.307017	0.168052	-1.10744	-0.0830248	-0.159072	-1.50212	0.351743	-0.440238	-0.837021	-0.524539	-0.302852	-0.805846	0.534169	0.368615	-0.363337	-0.924233	-0.625909	-0.235892	-0.672553	-1.13054	-0.655126	0.0601432	-0.244097	-0.732839	-0.908302	-1.13306	-0.412786	-0.838045	-0.66115
ENSMUSG00000042686	Jph1	A	-1.75067	-1.94755	-2.51973	-2.2454	-2.02337	-2.05485	-2.30508	-1.61383	-1.78055	-2.20731	-1.35149	-1.87805	-1.8541	-2.02696	-1.73446	-1.60934	-0.187453	-0.135637	0.108008	-0.201123	-0.331756	-0.927613	0.169511	-0.420328	-0.632452	-0.010575	-0.0209165	-0.648794	0.420556	-0.19344	0.00805402	1.64275	1.82377	1.68748	1.46486	1.61481	1.36125	1.65257	1.71822	1.59775	1.84441	1.80939	1.44654	1.48334	1.81947	1.72216	0.275081
ENSMUSG00000038128	Camk4	A	-2.11033	-2.16777	-2.06613	-1.86376	-1.96292	-1.90944	-1.92329	-1.72811	-1.66915	-1.90524	-1.70558	-1.50205	-1.60731	-1.63423	-1.46245	-1.58526	0.189509	0.539414	-0.0104751	0.0134784	0.41139	-0.44402	0.37987	0.237156	-0.118364	-0.00196274	0.659032	-0.135381	0.34904	0.00389594	0.0560609	0.0086626	-0.368723	-0.0428896	-0.256656	-0.27438	-0.529052	-0.212782	-0.462292	-0.343835	-0.625882	-0.447522	-0.306657	-0.484664	-0.584905	-0.480156	0.613516
432855	NA	A	0.744695	-0.491672	-1.07317	-1.58256	-2.68131	-1.78076	-0.983634	-1.65805	-0.0508187	-1.82614	-0.965075	-1.06056	-0.143942	-0.991705	-1.21697	-0.393441	-0.0318755	0.317732	0.379302	-0.289343	0.219162	0.944964	-0.585325	0.642388	0.729056	0.289989	0.161281	0.144422	-0.617492	0.12669	0.738619	0.157243	-0.54165	-1.68352	-0.161887	-0.634566	-0.932253	-0.428129	-1.00533	-0.918677	-1.00334	-1.18794	-0.919855	-0.50738	-1.08821	-0.688056	-0.56718
ENSMUSG00000030352	Tspan9	A	-0.750275	-0.907349	-1.00542	-0.987481	-0.882069	-1.19189	-1.11852	-1.24321	-1.05762	-0.965083	-1.08284	-1.20174	-1.19843	-1.19223	-1.26671	-1.26356	-0.779916	-0.699083	-0.512832	-0.634895	-0.626814	-0.744059	-0.58512	-0.634339	-0.795079	-0.462721	-0.995832	-0.571482	-0.824161	-0.61755	-0.539935	0.193744	-0.332898	-0.274155	-0.0540149	-0.376364	0.00877143	-0.41403	-0.407664	-0.108066	-0.211721	-0.50076	-0.499122	-0.107532	-0.217257	-0.318964	-0.470226
ENSMUSG00000024245	Tmem178	A	-2.26007	-2.09247	-1.73335	-1.90413	-2.06251	-2.1446	-2.09689	-1.84882	-2.18117	-2.19678	-2.15725	-2.11373	-2.3172	-2.1945	-2.10996	-1.84373	0.122141	-0.0428744	-0.438757	-0.233157	-0.69043	-0.616278	-0.337945	-0.287501	-0.45285	-0.87867	-0.191509	-0.560123	-0.00426447	-0.460257	-0.186602	0.53869	0.529308	0.529929	0.458368	0.538378	0.567266	0.390332	0.564507	0.510805	0.265309	0.52684	0.336542	0.213899	0.50817	0.534172	0.829907
ENSMUSG00000035506	Slc12a8	A	-0.503606	-0.919264	0.156454	-0.551853	-0.61439	0.754206	-0.642741	-3.13341	-0.215035	-0.055041	-0.494034	-1.05872	-1.41979	-0.340944	0.0293276	-1.21283	-2.70908	-0.165883	-1.19357	-1.21298	-0.522292	-0.880884	0.286842	-0.0645868	-1.03983	0.076553	-0.904064	-0.892164	-0.164268	-0.76363	-1.52132	0.0716276	-0.389601	-0.322291	-0.903837	-0.772463	-0.494365	-1.08832	-0.486271	-1.28908	-0.260017	-0.434454	-0.0242843	-0.48273	-0.679102	-0.349821	-0.865569
ENSMUSG00000090546	Cdr1	A	-1.03577	-1.42759	-1.61796	-0.466648	-1.75628	-1.37665	-1.49492	-1.77567	-1.37121	-2.35991	-1.81291	-1.49833	-1.12316	-1.46957	-1.0527	-1.75439	-0.796325	-0.0296137	-0.825478	-1.41785	-0.79093	-0.63938	-0.568222	-0.929491	-0.142177	-0.740629	-0.993582	-0.758942	-1.00766	-0.449537	-0.461719	-0.272392	-0.135491	-0.294848	-0.600501	0.0474115	-1.22149	0.0821602	-0.211013	-0.704606	-0.638288	-0.0475622	0.129631	-0.463248	-0.471704	-0.605637	1.12401
ENSMUSG00000030109	Slc6a12	A	-0.499956	-1.01239	-1.31056	-2.93842	-2.54285	-0.00391709	-1.72422	-0.957949	-1.62733	-1.56229	-1.48237	-1.79783	-1.22479	1.17448	-1.39776	-0.890889	-1.17556	1.28322	1.39973	1.55261	-0.117141	1.9001	1.05537	-0.183853	1.61699	0.59905	-1.43018	0.631259	1.81956	-0.568632	0.267574	-0.750853	-1.9552	0.235415	-0.650303	-0.0759937	-0.75306	0.068016	-0.119997	-0.969507	-1.30183	-0.878635	-1.0815	0.0971225	-0.484105	-0.600831	-0.481756
ENSMUSG00000019966	Kitl	A	-1.3097	-1.57032	-1.49012	-0.926712	-1.68447	-1.24117	-2.08523	-1.49935	-1.17536	-1.52765	-1.33038	-0.769671	-1.3392	-1.22456	-0.164577	-0.885667	0.0618501	0.122779	-0.0635607	-0.307906	-0.117202	0.149628	0.254567	0.236516	-0.258132	-0.391252	0.0812172	-0.0863382	0.189225	0.180104	0.0304067	-0.0867751	-0.690169	-0.628398	-0.623387	-0.76678	-1.18056	-0.25772	-1.09241	-0.76071	-0.846713	-1.03672	-0.678993	-0.675515	-1.04343	-1.22719	0.252248
ENSMUSG00000025425	St8sia5	A	-1.14979	-2.01093	-1.84528	-1.70368	-1.74109	-1.62033	-2.02352	-1.65515	-1.90493	-1.75075	-1.95043	-1.54045	-2.0518	-1.97948	-1.83793	-1.8822	-0.180538	-0.114443	-0.219645	-0.129683	-0.735469	-1.17935	-0.284678	-0.653491	-0.264041	-0.760662	0.109699	-0.168958	-0.155971	-0.306754	-0.391409	0.199853	0.0617375	-0.121286	0.192152	-0.088178	0.133538	-0.154245	-0.0575843	0.00537988	0.0334629	-0.0543	-0.0237584	0.0416241	0.0169578	0.0140942	0.357228
ENSMUSG00000020428	Gabra6	B	-3.19449	-3.44811	-2.41583	-0.106021	-3.05254	-1.42419	-2.71688	-2.27009	-3.44811	-2.5324	-2.54371	-1.85939	-3.44811	-0.862702	-2.48122	-2.41626	-0.0929883	-3.44811	-3.05285	-2.96484	-1.37992	-1.92075	-0.571198	-0.948962	-2.15388	-2.67629	-0.0432136	-2.09572	-0.789839	-1.82316	-1.96277	4.50794	-0.308167	-1.19672	-0.718661	-2.83099	-1.20471	-0.589338	-2.23644	-2.46877	-2.30713	-1.9113	-0.261392	-1.78826	-1.75201	-2.72219	-2.70532
ENSMUSG00000040380	Cbln3	B	-2.1997	-2.43832	-3.31885	-0.87181	-2.29965	-1.53877	-2.63257	-0.497626	-2.13324	-2.73192	-2.66781	-2.41056	-4.01332	-1.11635	-2.05677	-1.56563	-0.505748	-2.10083	-2.14176	-3.36314	-2.90719	-1.87399	-0.359605	-1.41027	-1.75529	-3.46507	-0.0943008	-1.28526	-2.33078	-1.82752	-1.84403	4.2942	-0.960976	-1.77898	-1.29013	-2.49311	-0.811612	-0.87402	-1.34803	-2.03532	-1.80547	-1.52911	-0.480143	-2.03221	-2.38449	-2.39942	-2.34057
ENSMUSG00000055333	Fat2	B	-2.50182	-3.59448	-3.07389	0.118782	-3.55506	-1.46512	-1.96139	-0.138385	-3.24148	-3.95063	-2.49458	-2.56864	-3.54388	-1.66069	-2.98373	-2.32334	-0.414498	-0.486965	-2.58555	-2.57676	-2.40655	-2.58952	-0.869009	-0.881799	-3.163	-3.95063	-0.448572	-1.09994	-0.84802	-1.99981	-1.83208	3.79151	-0.732875	-0.859285	-1.44957	-1.9739	-1.26896	-1.04093	-1.72258	-1.98172	-0.807474	-1.96587	-1.15157	-1.1683	-2.1737	-1.6897	-1.98046
ENSMUSG00000004630	Pcp2	B	-0.19478	-2.69605	-1.68136	-1.55894	-1.31708	-1.09026	-2.58294	-0.88166	-2.86662	-2.96044	-2.67136	-2.72526	-3.57577	-1.58878	-2.60887	-2.54391	-0.736777	-1.50183	-0.907175	-2.2019	-1.74596	-1.4215	-0.69885	-1.47652	-1.90733	-2.16942	-0.509083	-0.85503	-0.860802	-1.72561	-3.57577	3.05027	-1.05937	-0.817135	-1.17726	-1.55093	-1.58006	-0.199893	-2.2088	-1.02539	-2.25001	-0.876807	-1.81706	-1.41234	-1.27698	-1.67017	-2.4901
ENSMUSG00000032021	Crtam	B	-2.08343	-2.08343	-1.80955	-2.08343	-2.08343	-1.48779	-1.67197	-0.102963	-2.08343	-1.84795	-1.7154	-1.59639	-2.08343	-0.883816	-2.08343	-2.08343	-2.08343	-2.08343	-2.08343	-2.08343	-2.08343	-1.38075	-2.08343	-2.08343	-2.08343	-2.08343	-0.24248	-2.08343	-1.75805	-2.08343	-2.08343	3.20189	-1.67676	-1.497	-0.968895	-1.9027	-0.660757	-1.74934	-2.08343	-1.10408	-0.313395	-1.57494	0.183899	-2.08343	-1.83649	-0.876835	-2.08343
ENSMUSG00000002930	Ppp1r17	B	1.47812	1.3101	1.46126	2.01574	1.07171	1.18079	1.41723	1.59392	0.856707	0.962382	1.32681	1.39442	1.54575	1.08586	1.09336	1.64783	-1.26749	-2.93476	-2.00486	-2.45819	-1.35546	-1.18666	-2.52779	-2.25011	-2.31144	-1.27655	-1.45614	-2.28158	-1.01534	-2.89787	-1.73336	2.26282	-1.81451	-1.66106	-3.28437	-3.38461	-3.10015	-1.47035	-4.18573	-4.11808	-3.0333	-3.21308	-2.2555	-3.16674	-2.82672	-3.31623	-3.59843
ENSMUSG00000042096	Dao	B	-2.65108	0.131359	-1.12427	-0.73654	-0.710284	-2.05543	-0.247708	0.300174	-1.33999	-0.0324365	-0.581889	-1.51049	0.378417	-0.20585	-0.203506	-0.869704	-2.65108	-2.16432	-1.6909	-2.65108	-2.65108	-2.65108	-0.526903	-0.223525	-1.86345	-1.69262	-1.85378	-1.48585	-1.4716	-2.65108	-2.65108	2.626	-2.65108	-1.84184	-0.546221	-2.65108	-1.04022	-0.800744	-1.81141	-1.93061	-1.32532	-1.9428	-1.23491	-0.176071	-1.8464	-1.36496	-1.56541
ENSMUSG00000054901	Arhgef33	B	0.0182748	-0.675906	-0.462739	-0.901841	-0.442172	-1.54657	-0.420792	-0.0373647	-0.278786	-0.653995	-0.84043	-1.06368	-0.477754	-0.780858	-0.548872	-0.753281	-0.883964	-0.99237	-2.35118	-3.18744	-1.42096	-1.23267	-1.57807	-3.16718	-1.42714	-3.07362	-0.312409	-2.36546	-1.11031	-0.809077	-0.866858	2.21788	-0.764696	-1.32792	-1.74397	-2.00724	-1.78867	-0.730516	-1.976	-1.56375	-2.1399	-2.29911	-1.83802	-2.07609	-2.17863	-1.11759	-1.63565
ENSMUSG00000041261	Car8	B	-1.22325	-1.37663	-1.41139	-1.10999	-1.32407	-0.921078	-1.32217	-0.920298	-0.996726	-1.27414	-1.09391	-0.980503	-1.05348	-0.809972	-0.932926	-0.923776	-0.966745	-1.71848	-1.52072	-1.78816	-1.30661	-0.691863	-1.1051	-0.935244	-1.89402	-1.60794	-1.77111	-1.85108	-1.57773	-1.86961	-1.66923	2.59361	-1.35906	-1.74011	-2.10052	-2.57658	-1.89526	-1.86124	-2.59598	-2.51285	-1.94299	-2.31871	-2.20483	-2.1955	-2.77942	-2.68882	-0.898177
ENSMUSG00000028946	Hes3	B	-2.24693	-1.89078	-1.07424	-2.24693	-1.54124	-0.90583	-2.24693	0.29909	-1.36218	-1.6316	-1.34252	-1.75989	-1.52325	-1.79222	-1.84835	-1.81587	-2.24693	-2.24693	-1.54173	-2.24693	-1.53436	0.265671	-0.251895	-0.454641	-1.4593	-2.24693	-0.135795	-1.85662	-1.23833	-2.24693	-2.24693	2.12996	-1.52337	-1.43769	-2.24693	-1.90562	-1.60513	-1.91284	-1.90983	-2.24693	-2.24693	-1.2068	-1.93846	-2.08344	-2.24693	-2.24693	-1.01621
ENSMUSG00000039095	En2	B	-0.565352	-0.65941	-2.16982	-0.550006	-0.0915648	-0.776533	-0.789331	-1.24569	-0.467965	-1.27346	-0.65528	-1.35138	-1.11337	-0.361091	-1.07529	-0.613302	-1.64068	-1.81816	-2.93193	-3.04746	-2.34802	-3.49839	-1.6494	-1.025	-1.47056	-1.56765	-2.38387	-1.9676	-1.35436	-3.05891	-0.812045	2.3064	-0.806454	-1.80128	-1.2953	-1.56912	-1.70674	-0.516226	-1.12854	-1.26409	-1.68548	-1.34132	0.0437051	-1.32658	-1.43779	-1.48172	-1.69312
ENSMUSG00000044681	Cnpy1	B	-1.76593	-1.40978	-1.49206	0.0385058	-1.37036	-0.159687	-1.35448	-1.76593	-1.25677	-1.15061	-1.3979	-1.76593	-1.76593	-0.687647	-1.05539	-1.76593	-1.76593	-1.76593	-1.76593	-1.76593	-1.76593	-1.76593	-0.24669	-1.76593	-1.76593	-1.76593	-1.31289	-1.76593	-1.44056	-0.268307	-1.76593	2.91581	-0.782719	-0.593566	-1.76593	-1.28013	-1.30806	-0.268151	-1.76593	-1.36119	-1.76593	-1.76593	-1.76593	-1.76593	-1.76593	-1.76593	-1.76593
ENSMUSG00000090461	Iltifb	B	-1.64281	-1.64281	-1.36893	1.1263	-1.64281	-1.64281	-1.64281	-1.64281	-1.64281	-1.64281	-1.64281	-1.64281	-1.64281	-1.18809	-1.64281	-1.64281	1.19618	-0.261431	-1.64281	-1.64281	-1.64281	-1.64281	0.709413	-1.64281	-1.1959	-0.519113	-1.64281	-1.64281	-0.463329	-1.64281	-1.64281	1.78711	-0.783589	-1.05638	-1.64281	-1.64281	-1.64281	-1.64281	-1.64281	-1.64281	-1.64281	-1.36627	-1.33434	-1.64281	-1.64281	-1.64281	-1.1078
ENSMUSG00000052854	Nrk	B	-1.77855	-1.4224	-0.746261	-1.77855	-1.07286	-0.762557	-1.77855	-1.77855	-1.50162	-1.77855	-1.77855	-1.77855	-1.77855	-0.363174	-1.77855	-1.01604	-1.77855	-0.928483	-1.77855	-0.933907	-0.809106	-1.77855	0.216483	0.494167	-0.990919	-1.77855	-0.98125	-1.77855	-1.77855	-1.77855	-1.77855	1.89694	-0.575356	-0.190656	-1.77855	-1.16142	-1.32068	-1.44446	-1.77855	-1.77855	-1.77855	-1.27006	-0.812431	-1.77855	-1.13694	-1.77855	-1.24355
ENSMUSG00000014198	Zfp385c	B	-1.23147	-0.878925	-1.27431	-2.57494	-1.20907	-0.744793	-1.16887	-2.57494	-0.51345	-1.01408	-0.720818	-0.644781	-1.18072	-1.26342	0.0318308	-1.81243	-2.57494	-2.08818	-0.894045	-2.57494	-2.57494	-0.639902	-0.332242	-2.57494	-0.609639	-2.57494	-2.57494	-2.57494	-1.56634	-2.2409	-1.38237	1.41493	-1.27318	-1.25037	-1.46041	-1.19562	-1.77004	-1.07716	-1.20797	-2.17019	-2.57494	-1.69122	-2.26647	-1.79257	-2.328	-1.73922	-1.83214
ENSMUSG00000002100	Mybpc3	B	-2.36339	-2.36339	-2.36339	-2.36339	-2.36339	-1.3474	-2.36339	-2.36339	-2.36339	-2.36339	-1.99536	-2.36339	-2.36339	-1.72577	-2.36339	-2.36339	0.0816483	-1.87664	-0.682498	-1.88012	-1.65082	-1.19023	-0.0111728	-2.36339	-1.91648	-1.2397	-1.05556	-1.41329	-0.893024	-2.36339	-1.01702	0.942341	-1.63984	-1.77696	-0.0190254	-1.51481	-1.15719	-1.75822	-1.32576	-0.655425	-1.43437	-0.457785	-0.604688	-1.07657	-0.58647	-1.88584	-0.095549
ENSMUSG00000020061	Mybpc1	B	-2.1597	-3.11445	-4.3775	-4.3775	-3.67181	-4.3775	-3.64627	-2.55974	-4.10057	-3.21329	-3.26489	-2.99551	-3.39413	-2.96212	-3.66695	-3.61499	-0.342934	-0.672766	-1.50889	-0.477662	-1.01833	-0.685624	0.0255768	-0.974122	-3.58987	-0.0315157	-0.433768	-0.502746	-0.747032	-0.931176	0.455986	1.01855	-0.689858	-0.49076	-2.82066	-0.916878	-0.746139	-0.344129	-1.22428	-1.14173	-1.13914	-1.3825	-1.48285	-0.731426	-1.03442	-0.747686	1.14979
ENSMUSG00000043144	Aqp6	B	-2.11313	-1.23341	-0.694982	-2.11313	0.0471731	-0.282983	-0.123899	-2.11313	-1.40399	-1.67526	-1.45213	-0.731144	-0.909761	0.176806	-0.92863	-1.68208	-2.11313	-2.11313	-0.936345	-1.62986	-2.11313	0.139399	-2.11313	-2.11313	-0.619693	-2.11313	0.421925	-1.41594	-1.52243	-0.909805	-2.11313	2.24825	-1.70646	-2.11313	-1.85708	-1.77182	-1.47133	-0.909669	-2.11313	-1.70838	-2.11313	-2.11313	-2.11313	-1.23347	-1.6554	-2.11313	-1.02746
ENSMUSG00000002020	Ltbp2	B	-3.14082	-2.05674	-1.16749	-3.14082	-2.18002	-1.1169	-1.27679	-3.14082	-1.82974	-1.13574	-1.68478	-1.3713	-1.29061	-1.8293	-1.07659	-2.10896	-2.38901	-1.06689	-1.32465	-2.00744	-1.59675	-1.96766	-2.05686	-1.34854	-0.820541	-2.369	-0.911473	-2.19072	-1.67045	-1.51587	-0.583715	1.99751	-1.57828	-2.55439	-2.88477	-2.09284	-1.82233	-3.14082	-1.5059	-1.75165	-1.81507	-2.10069	-1.60122	-1.48096	-1.62134	-1.13786	-1.44273
ENSMUSG00000027855	Sycp1	B	-1.41512	-1.41512	-1.41512	-1.41512	-1.41512	-0.819472	-1.41512	-1.41512	-1.41512	-1.41512	-1.41512	-1.41512	-0.691439	-0.336828	-1.41512	-1.41512	-1.41512	-1.41512	-1.41512	-1.41512	-1.41512	-0.458097	-1.41512	-1.41512	-1.41512	-1.41512	-1.41512	-1.41512	-0.824413	-1.41512	-1.41512	1.82428	-1.1975	-1.41512	-1.41512	-1.41512	-1.41512	-1.08102	-1.41512	-1.41512	-1.41512	-0.906622	-1.41512	-1.25163	-1.16817	-1.41512	-1.41512
ENSMUSG00000025927	Tfap2b	B	-3.17124	-1.60562	-1.44895	-2.81849	-0.733883	-0.143366	-2.17841	-3.17124	-1.34776	-1.37124	-1.7152	-1.78925	-2.44756	-1.56821	-2.20434	-2.13938	-0.819763	0.660905	-1.63963	-0.641437	-1.98382	-2.21422	-1.31805	-0.251003	-0.655088	-0.780419	-2.7182	-0.0391882	-0.909754	-1.67361	-1.97867	1.48531	-1.6905	-2.16904	-2.6978	-1.65101	-2.36633	-0.598086	-1.53632	-1.78206	-1.16646	-2.66274	-1.05437	-1.40577	-2.22007	-1.31691	0.114818
ENSMUSG00000091519	Skor2	B	0.329225	-1.55471	0.564591	-1.55471	-0.377211	-1.55471	-1.55471	0.26304	-1.04555	-0.509411	-0.650309	-1.06767	-0.571346	-0.355101	-0.844168	-0.522857	-1.55471	-1.55471	-1.55471	-1.55471	-1.55471	-1.55471	-1.55471	-1.55471	-1.55471	-1.55471	-1.55471	-1.16441	-1.55471	-1.55471	-1.55471	1.9335	-0.980921	-1.55471	-1.55471	-1.55471	-1.55471	-1.55471	-1.55471	-0.834247	-0.874251	-1.55471	-0.992251	-1.55471	-1.09699	-1.55471	-1.55471
ENSMUSG00000044244	Il20rb	B	-0.815935	-0.967788	-1.79151	-0.445319	-0.931837	-2.4965	-3.09214	-1.36318	-2.05086	-1.92793	-1.3589	-1.50341	-2.36846	-2.45452	-1.90764	-3.09214	-0.476413	-2.24207	-1.91535	-1.71828	-3.09214	-1.28062	-2.00818	-3.09214	-1.7979	-1.56284	-2.01711	-1.57409	-1.7599	-3.09214	-2.76202	2.00932	1.23331	0.769932	0.886041	1.08435	0.683911	1.05169	1.1073	0.775956	0.992805	1.55668	1.07184	0.723345	1.1211	1.04623	-0.96547
ENSMUSG00000001741	Il16	B	-2.91079	-2.46084	-1.96416	-2.01173	-2.16325	-1.50812	-2.62175	-3.33366	-2.37099	-2.43462	-2.20776	-2.18137	-2.45872	-2.20536	-1.8509	-3.06921	-1.19487	-1.42805	-1.63829	-1.43972	-1.40494	-1.33271	-0.727745	-0.803802	-2.19241	-1.78162	-1.28805	-1.36521	-1.34446	-1.66488	-1.48273	2.18291	1.81262	1.95474	1.94351	1.96416	2.05188	1.58406	2.15729	1.77827	1.31398	2.07884	1.71353	1.675	2.13715	2.04122	-2.19242
ENSMUSG00000054065	Pkp3	B	-1.82892	-1.18737	-0.0180138	-1.82892	-0.868125	-1.82892	-0.836094	-0.650904	-1.31976	-0.913211	-1.46089	-1.34188	-1.82892	-1.1913	-1.82892	-0.797066	-1.82892	-1.82892	-1.82892	-0.984281	-1.42908	-1.82892	-1.82892	0.27032	-0.534687	-1.82892	0.509685	-1.13173	-1.82892	-1.82892	-1.82892	1.2299	-0.348183	-1.82892	-1.82892	-0.308697	-0.622717	-0.995629	-1.82892	-1.82892	-1.44894	-0.647699	-1.05056	-0.406752	-0.309442	-0.706496	-0.904528
ENSMUSG00000011034	Slc5a1	B	-1.64931	-1.64931	-1.64931	-1.64931	-1.64931	-1.64931	-1.64931	-1.64931	-1.64931	-1.64931	-1.64931	-1.64931	-1.64931	-1.1946	-1.25073	0.398214	-0.405754	-1.16256	-1.64931	-1.64931	-1.64931	-0.476148	-0.844794	-1.64931	-1.64931	-0.120009	-0.852013	-1.64931	-1.64931	-1.64931	-1.64931	1.15797	-1.07552	-1.06288	-0.670354	-0.269996	0.277203	-0.0241987	-0.437638	-0.0919535	-0.0127262	-0.112495	0.386003	0.214555	-0.331138	-0.813588	-1.35715
ENSMUSG00000044165	Bcl2l15	B	-1.5288	-1.49559	-1.88191	-2.75864	-1.58114	-1.1524	-2.02741	-1.45232	-0.935163	-0.753565	-0.792985	-0.989123	-1.36442	-1.15562	-0.0784085	-1.72678	-1.51508	-1.17058	-0.818803	-1.62526	-2.75864	-1.08222	-2.75864	-0.0638196	-1.46441	-0.821412	-1.96134	-1.59341	-1.16222	-0.908484	-1.41227	1.30976	-0.326781	-0.433199	-1.10958	-1.04992	-0.981341	-1.26086	-1.39168	-0.0569649	-1.43289	-0.559584	-1.21904	-1.09878	-0.459853	-0.853047	0.106331
ENSMUSG00000022245	Skor1	B	-1.23904	0.752108	-0.451124	0.363728	-0.528439	0.852704	0.379225	0.394744	-0.916374	-0.160931	-0.612294	-0.576011	-0.0503048	0.0497668	-0.519462	-1.91448	-1.59372	-1.49546	-2.34553	-1.21214	-1.63296	-0.534011	-0.649675	-1.10144	-0.521037	1.27726	-1.54823	-0.202336	-0.426043	-0.720579	-0.616924	1.14268	-1.93886	-0.883301	-1.231	-1.60804	-1.2611	-0.987416	-1.50586	-2.34553	-2.34553	-0.917786	-1.37941	-2.34553	-2.09859	-1.61961	-2.05337
ENSMUSG00000003573	Homer3	B	-1.84964	-1.68095	-2.00256	-3.29392	-1.37232	-1.9647	-1.90167	-1.8318	-2.04953	-1.89779	-2.16984	-2.02702	-2.34197	-1.83745	-2.12121	-2.02424	-2.13008	-1.39806	-1.63911	-1.15835	-2.30846	-0.906102	-1.33251	-1.10883	-1.65955	-1.16258	-1.97177	-1.36367	-1.99724	-1.76394	-1.45988	1.78272	1.26606	1.41931	1.28929	1.23881	1.37356	0.978795	1.33083	1.30767	0.662662	1.55474	1.34843	1.29492	1.75102	1.51862	-1.96882
ENSMUSG00000039728	Slc6a5	B	-1.3341	-1.3341	-1.3341	0.470339	-1.3341	-1.3341	-0.602868	-1.3341	-0.824939	-0.288796	-0.221491	-1.3341	-1.3341	-1.3341	-1.3341	-0.903046	-1.3341	-1.3341	-0.373927	-1.3341	-1.3341	-1.3341	-1.3341	-1.3341	-1.3341	-1.3341	-1.3341	-1.3341	-0.154623	-1.3341	-1.3341	1.42664	-1.3341	-0.331902	-1.3341	-1.3341	-1.3341	-1.00001	-0.997003	-1.3341	-1.3341	-0.625828	-1.3341	-1.3341	-1.3341	-1.3341	-1.3341
ENSMUSG00000034701	Neurod1	B	-2.78703	-2.42787	-2.89062	-2.6108	-3.06944	-1.96624	-3.32157	-2.66526	-2.6986	-2.78024	-2.95725	-2.26892	-2.17619	-2.4688	-2.50185	-2.71573	-0.259929	-0.684741	-0.532019	-0.531699	-0.932617	-0.154933	-0.5798	-0.759774	-0.947756	-1.26309	-0.157922	-0.798854	-0.49872	-0.808996	-0.628969	1.21767	0.508892	0.461574	0.251556	0.417338	0.185761	0.375465	0.270013	0.25969	0.111104	0.530301	0.183222	0.309618	0.285532	0.0847564	-0.641937
ENSMUSG00000027843	Ptpn22	B	-0.320298	-0.0865337	-0.998116	-2.80903	-1.63152	-2.21338	-2.07779	-2.30223	-0.822593	-1.33758	-1.90462	-0.602975	-0.334022	-0.822043	-1.84213	-0.888448	-1.1994	-1.04021	-0.459277	-0.888592	-0.0544583	-0.556497	-2.80903	0.350987	-2.0214	-2.80903	-2.35599	-1.00771	-1.21261	-0.858208	-1.19693	1.2971	-1.32829	-0.557629	-0.914143	-0.784193	-1.8576	0.566847	-0.847278	-1.10106	-0.91685	-0.749245	-0.40546	-0.809099	-0.624088	-0.90343	-1.57831
ENSMUSG00000005716	Pvalb	B	-1.37938	-2.07669	-1.74685	-2.70017	-1.70817	-2.18009	-1.80189	-1.64394	-1.58458	-1.58381	-1.67593	-1.80916	-1.57588	-1.71495	-2.17936	-1.75107	-2.60173	-2.30377	-2.09204	-2.25938	-2.62409	-2.43701	-2.1927	-2.02555	-1.97218	-1.76035	-2.06806	-2.59307	-2.06606	-2.30324	-2.114	0.913232	-0.346058	-0.647232	-0.672746	-0.473574	-0.4101	-0.390667	-0.653842	-0.549454	-0.287694	-0.475617	-0.270978	-0.735938	-0.493902	-0.662723	0.813077
ENSMUSG00000040610	Tlx3	B	-1.11777	-1.11777	-1.11777	-1.11777	-1.11777	-1.11777	-1.11777	-1.11777	-1.11777	-1.11777	-1.11777	-1.11777	-1.11777	-1.11777	-1.11777	-1.11777	-1.11777	0.263605	-1.11777	-1.11777	-1.11777	-1.11777	-1.11777	-1.11777	-1.11777	-1.11777	-1.11777	-1.11777	-1.11777	-1.11777	-1.11777	-0.828279	-1.11777	-1.11777	-1.11777	-1.11777	-1.11777	-1.11777	-1.11777	-1.11777	-1.11777	-0.609277	-0.8093	-1.11777	-1.11777	-1.11777	-1.11777
ENSMUSG00000007030	Vwa7	B	-0.262511	-1.40967	-0.394983	-1.03542	-2.28939	0.196121	0.435367	-2.28939	-0.382132	-0.564781	-0.123608	-1.43888	-1.56571	-0.686362	-0.339329	-1.52688	-1.86505	-1.43932	-0.473219	-2.28939	-1.57682	-0.477869	-0.436204	-1.22247	-0.795951	-0.265953	-2.28939	-1.89908	-2.28939	-0.791762	-1.46453	1.36079	-0.987627	-0.827159	-1.46008	-1.15117	-1.33796	-2.28939	-1.67923	-2.28939	-0.799863	-1.78089	-0.636077	-0.62953	-0.435939	-1.68231	-0.806139
ENSMUSG00000020788	Atp2a3	B	-0.380428	-1.28915	-0.980935	-1.24449	-1.02249	-0.952186	-1.55311	-0.739332	-1.5373	-1.39585	-1.43332	-1.10069	-1.5861	-1.52747	-0.908885	-1.17899	-0.539414	-0.672242	-0.670061	-0.40781	-0.423784	-0.160806	-1.2826	-0.206735	0.0787394	-0.841657	-0.973703	-0.555191	-0.767435	-0.24002	-0.513764	0.896378	-0.863021	-1.73584	-0.806812	-1.15274	-0.924196	-1.20879	-1.09918	-1.14688	-1.21681	-1.1492	-0.758581	-1.73026	-0.97302	-1.19444	-1.66117
ENSMUSG00000032845	Alpk2	B	-2.06024	-0.976159	-0.165834	-2.06024	0.100063	-1.4646	-1.32901	-1.55345	-0.749155	-0.786186	-1.69221	-1.5732	-1.65349	-1.26031	-1.09334	-2.06024	1.14248	-2.06024	-0.883455	-0.686375	0.694328	-0.125202	-2.06024	-2.06024	-2.06024	1.38654	-2.06024	-0.258927	-0.727998	0.234923	-0.867669	1.64012	-1.07703	-1.251	-1.5868	-1.87951	-1.81322	-1.45506	-0.553086	-1.33977	-1.37978	-1.35197	-0.301535	-1.49467	-1.60251	-2.06024	-0.362145
ENSMUSG00000032368	Zic1	B	0.00282745	0.0678956	0.136678	-0.102055	0.782903	0.224609	-0.468481	-0.95713	-0.206913	-0.347928	-0.206371	0.378034	-0.544132	0.125818	0.422349	-0.533641	-2.47952	-0.965906	-1.66229	-1.09885	-2.24991	-0.946316	-1.28951	-1.14602	-1.02881	-0.766563	-2.20126	-1.31668	-0.872313	-2.39658	-1.37903	0.91069	-1.83123	-1.4984	-1.60222	-1.12008	-1.45242	-1.15422	-1.96073	-2.2842	-1.6664	-2.07101	-0.0425069	-1.16685	-1.93419	-2.03326	-2.0984
ENSMUSG00000045246	Kcng4	B	-1.78435	-0.986559	-1.49247	-2.4246	-1.05564	-1.52955	-1.62812	-1.32588	-1.25093	-1.27478	-1.14209	-1.54817	-1.73784	-1.45746	-1.6346	-1.02113	-1.74384	-1.95998	-2.46309	-1.93792	-2.99085	-1.67558	-1.78198	-0.970799	-2.88372	-2.22346	-2.69806	-2.44488	-1.94821	-2.78911	-1.96934	1.52888	-0.235328	-0.771412	-0.409678	-0.290312	-0.346627	-0.618374	-0.327907	-0.448723	-0.353478	-0.469724	-0.261205	-0.462149	-0.432242	-0.387874	0.233474
328235	NA	B	-2.36213	-1.09907	-2.36213	-2.36213	-1.18462	-2.36213	-1.95067	-0.633171	-1.85297	-1.58881	-0.906086	-2.36213	-1.15876	-0.946752	-2.36213	-1.59962	-2.36213	-1.87537	-0.422287	-1.51748	-0.293933	-2.36213	-2.36213	0.706699	-0.693687	-1.5903	-1.56483	-1.66494	-0.542501	-0.737175	-0.750032	0.771656	-1.06037	-0.658644	-0.626388	-1.22391	-0.665649	0.00785072	-1.52246	-1.16336	0.321322	-1.05238	-0.0947987	-0.758121	-1.72052	-0.560947	-0.163144
ENSMUSG00000021359	Tfap2a	B	-1.34538	-0.0333877	-1.59901	-1.59901	-1.59901	-1.59901	-1.59901	-1.09221	-1.32208	-0.324952	-1.23097	-1.59901	-1.59901	-1.59901	-1.59901	-1.59901	-1.59901	-1.59901	-1.59901	-0.754363	-1.59901	-0.641987	-1.59901	0.303019	-1.1521	-1.59901	-1.59901	0.43898	-1.59901	0.251153	-0.252635	1.42082	-0.739788	-1.59901	-0.140689	-1.41828	-1.14113	-0.101224	-0.988849	-1.59901	-0.273252	0.0392169	-0.820644	-1.59901	-0.794331	-1.26377	-1.064
ENSMUSG00000035831	Krt25	B	-0.343746	-0.226929	0.796562	-0.53858	1.01353	-0.451449	-0.0656292	0.334127	-0.610065	0.392052	0.0615756	-0.203821	-0.229802	-0.280297	-0.608046	0.25498	-1.79255	-1.79255	-0.615761	-0.659161	-1.79255	-0.11612	-1.79255	-1.79255	-1.34564	0.144684	-0.284315	-1.40224	-1.79255	-1.79255	-1.79255	0.818819	-1.06899	-0.620179	-0.678013	-1.79255	-1.54552	-1.79255	-1.45545	-1.79255	-1.11208	-1.28405	-1.79255	-1.79255	-1.79255	-1.18547	-1.50039
100503106	NA	B	-1.17953	-1.17953	-1.17953	-1.17953	-1.17953	-1.17953	-1.17953	-1.17953	-1.17953	-1.17953	-0.811499	-1.17953	-1.17953	-0.541908	-1.17953	-0.147673	-1.17953	-1.17953	-1.17953	-1.17953	-1.17953	-1.17953	-1.17953	-1.17953	-1.17953	-1.17953	-1.17953	-1.17953	-1.17953	-1.17953	-1.17953	0.405377	-1.17953	-1.17953	-1.17953	-1.17953	-1.17953	-1.17953	-1.17953	-1.17953	-0.25051	-1.17953	-1.17953	-1.17953	-1.17953	-1.0022	-0.644528
ENSMUSG00000022686	B3gnt5	B	-1.93011	-0.822445	-0.216408	-3.03659	-0.981876	-0.841868	-0.825485	-2.1555	-0.975104	-1.56515	-1.18247	-0.961904	-0.840423	-0.407325	-0.35636	-0.398919	-1.13524	-0.310181	-1.09675	-1.66273	-0.862515	-0.23719	-2.23208	0.439564	-1.97354	-0.463226	-0.596421	-2.08649	-0.163817	-0.12711	-0.417795	0.735919	-0.694532	-0.125895	-0.807019	-1.5851	-0.737378	0.0158788	-0.808553	-0.197986	-1.40001	-0.48582	-1.62043	-0.873171	-1.34049	-1.34798	-0.986054
ENSMUSG00000010825	Grid2ip	B	-1.48255	-0.144779	-1.07224	-1.02881	-0.0785175	-1.61106	-1.08562	-1.60651	-0.662204	-0.286657	-0.651094	-0.384374	-0.999086	-1.32528	0.360765	-1.63792	-0.476622	-1.34563	-1.18326	-1.58338	-1.69415	-1.47313	-2.2602	-1.64928	-1.11075	-1.36251	-0.86556	-1.53148	-1.79427	-1.62712	-1.96714	0.254323	-0.753589	-1.19055	-1.04126	-1.57546	-1.24468	-1.1694	-2.04574	-1.84563	-1.76807	-1.73978	0.16865	-1.95339	-1.26812	-1.62198	-0.826054
ENSMUSG00000028369	Svep1	B	-0.750061	-0.876374	-1.2883	-0.678355	-2.07966	-0.53207	0.238942	-0.467996	-0.81055	-0.415201	-0.973473	-0.664861	-0.548421	-0.421693	-1.02033	-1.30423	-2.2576	-0.188305	-1.28206	-0.418577	-1.01578	-0.597313	-1.29815	0.0329255	-0.636251	-0.810482	-1.7911	-0.994454	-0.249674	-1.26944	-1.07838	1.0043	-1.72547	-1.49326	-1.56975	-1.51687	-1.89558	-1.01402	-1.31393	-1.73171	-1.14705	-1.69438	-1.75312	-0.883031	-1.56614	-2.06535	-0.948757
ENSMUSG00000004872	Pax3	B	-1.09442	-1.09442	-1.09442	-1.09442	-1.09442	-1.09442	-1.09442	-1.09442	-1.09442	-1.09442	-1.09442	-1.09442	-1.09442	-0.639711	-1.09442	-1.09442	-1.09442	-1.09442	-1.09442	-1.09442	-1.09442	-1.09442	-1.09442	-1.09442	-0.0313658	-1.09442	-1.09442	-1.09442	0.23782	-1.09442	-1.09442	0.68979	-0.876806	-1.09442	-1.09442	-1.09442	-0.847398	-1.09442	-0.757325	-1.09442	-1.09442	-1.09442	-0.531959	-1.09442	-1.09442	-1.09442	-1.09442
ENSMUSG00000050700	Emilin3	B	-1.68784	0.00817903	-1.68784	-1.68784	0.472467	-1.09219	-1.68784	-0.650653	-0.803085	-0.914515	-1.68784	-0.547253	-0.704468	-0.742025	-0.720937	0.232742	-0.669299	-1.68784	-1.68784	-0.107909	-1.68784	-1.68784	1.03446	-1.68784	-1.68784	-1.68784	-0.612806	-0.16979	-0.679236	-0.657741	-0.862981	-0.213958	-0.484644	-0.515469	-1.43178	-0.839258	-0.882933	-1.68784	-1.68784	-1.68784	-1.68784	-1.17934	-1.68784	-1.0098	-1.04623	-1.5105	-0.457121
ENSMUSG00000027861	Casq2	B	-1.11822	-0.761833	-0.704654	-0.129332	-1.00535	0.122898	-1.06841	-1.04327	-0.383891	-0.745014	-0.802873	-0.819581	-1.02375	-0.534599	-0.355797	-0.768438	-0.458394	-0.00831207	-1.32593	-1.7988	-1.04843	-0.901917	-1.35623	-0.707701	-1.47837	-0.166168	-1.76517	-1.66146	-1.33625	-0.731816	-1.56932	0.829827	-1.43765	-1.9037	-0.961414	-1.21379	-1.23122	-1.55359	-0.679937	-1.29284	-1.12113	-0.754012	-0.276642	-1.61609	-0.88112	-0.786643	-0.612154
ENSMUSG00000032717	Mdfi	B	-2.16488	-1.52332	-1.28815	-2.16488	-0.987375	-1.14889	-1.17205	-2.16488	-0.982396	-0.293231	-0.563593	-1.31437	-1.4412	-0.561852	-1.19798	-0.537593	-0.555252	0.375025	-1.76962	-1.03149	0.00920064	-0.353359	-1.08092	-2.16488	-1.10182	-0.227647	-0.857048	-0.240381	-0.345253	0.58613	-0.552783	0.687493	-0.684138	-0.840312	-1.05034	-1.1169	-1.70701	-0.422765	-0.797913	-1.76013	-1.23586	-1.88834	-0.625271	-0.950809	-1.52327	-0.536023	-1.24048
ENSMUSG00000031070	Mrgprf	B	-1.38362	-1.84584	-2.0766	-3.10889	-1.42711	-0.62338	-2.11606	-3.10889	-1.20163	-1.63744	-2.44789	-1.52016	-2.38521	-0.395714	-1.92439	-3.10889	-0.0766032	0.0651706	-0.672584	0.865884	0.157561	0.978743	-2.30437	1.08057	-0.266312	-0.323296	-0.321716	0.383242	0.814014	0.153816	-0.215919	0.489294	-1.39548	-0.645862	-1.29138	-0.506892	-2.02445	-0.892228	-0.588385	-1.26456	-1.4723	-1.47067	-0.309832	-1.39526	-1.04756	-1.7474	-1.22384
ENSMUSG00000043036	Ccdc63	B	-1.82606	-1.82606	-1.82606	-1.82606	-1.82606	-1.82606	-1.09483	-1.82606	-0.941307	-1.21074	-1.45803	-1.82606	-1.41931	-1.82606	-0.859159	-1.82606	0.0752968	0.10337	-1.4308	-0.692672	-1.42622	-1.82606	0.723034	-0.424196	-1.82606	0.68899	-0.518228	-1.82606	-1.82606	-1.82606	-0.479688	0.785308	-0.524296	0.264766	-0.473487	-0.874336	-1.02115	-0.467944	-1.48896	0.142851	-1.82606	0.158695	-1.0477	-0.769525	-0.874888	-0.888303	-0.23139
ENSMUSG00000056947	Mab21l1	B	-1.12935	-1.11814	-0.4404	-0.866933	-0.820555	-1.09967	-0.631879	0.269381	-0.458298	-0.242816	-0.772825	-0.246405	-0.811737	-0.570942	-1.02499	-0.158777	-1.05192	0.213446	0.175363	0.180771	0.0344543	0.00999136	0.251043	0.371306	0.754641	-0.242067	0.308024	0.522669	-0.286374	-0.0716994	0.0655372	0.655571	-0.882294	-1.37468	-1.94567	-0.400948	-1.74749	-0.699463	-1.31215	-0.752312	-0.609393	-1.59305	-1.3277	-1.08734	-1.94945	-3.30193	-2.07357
ENSMUSG00000043873	Chil5	B	-1.70064	-0.135026	-0.823911	-1.70064	-1.70064	-0.359546	-0.486449	-1.70064	-0.518162	-0.42659	-0.588035	-1.70064	-1.2939	-0.900713	-0.733744	-0.245893	-1.27631	-1.21389	-1.70064	-1.70064	-1.3008	-1.30694	0.294388	-0.298782	0.264658	0.481134	-0.903345	-0.348248	-0.885914	-0.670549	-0.875788	-0.478299	-0.977091	-1.70064	-1.70064	-0.748922	-1.70064	-0.342529	-1.09049	-1.2959	-1.70064	-0.816923	-0.419471	-0.486574	-0.749474	-0.864919	-0.957847
ENSMUSG00000021943	Gdf10	B	-2.07694	-1.58846	-1.56458	-1.01147	-1.33347	-1.37767	-1.28486	-1.5004	-1.47128	-2.06098	-1.13894	-1.555	-1.86613	-1.68815	-1.91975	-1.30009	-0.463208	-0.884511	-0.464004	-0.520549	-0.219706	-0.728413	-0.50165	-0.243977	-0.35261	-0.343045	-0.68021	-0.167582	-0.367711	-1.12813	-1.40581	0.873325	-0.296911	-0.490824	-0.416846	-0.355189	-0.467636	-0.748997	-0.264889	-0.574798	-0.535596	-0.359715	-0.575289	-0.275399	-0.255397	-0.443757	-1.52287
100502679	NA	B	-1.27626	-1.27626	-1.27626	-1.27626	-1.27626	-1.27626	-1.27626	-1.27626	-1.27626	-1.04078	-1.27626	-1.27626	-1.27626	-1.27626	-1.27626	-0.845206	-1.27626	-0.136218	0.53991	-1.27626	0.267814	-1.27626	-1.27626	-1.27626	-1.27626	-1.27626	-1.27626	-0.57907	-0.685558	-0.0729345	-1.27626	0.507953	-0.702466	-0.953452	-1.02021	-0.790459	-0.818388	-1.27626	-0.436593	-0.555793	-0.896276	-0.999725	-1.27626	-0.598225	-1.27626	-1.27626	-0.741258
ENSMUSG00000074695	Il22	B	-1.14618	-0.790026	-0.642211	-1.14618	-1.14618	-1.14618	-1.14618	-1.14618	-0.869249	-1.14618	-1.14618	-0.659135	-1.14618	-1.14618	-1.14618	-1.14618	-1.14618	-1.14618	-1.14618	-0.301534	-1.14618	-0.75247	-0.688549	-1.14618	-1.14618	-1.14618	-1.14618	-0.75587	-1.14618	-0.116081	-1.14618	-0.615687	-0.92856	-1.14618	-1.14618	-1.14618	-0.341273	-1.14618	-1.14618	-1.14618	-1.14618	-1.14618	-1.14618	-1.14618	-1.14618	-1.14618	-0.40338
ENSMUSG00000066438	Plekhd1	B	-0.958958	-0.813957	-0.90148	-0.885718	-0.630856	-0.700936	-0.70392	-0.296402	-0.203351	-0.667032	-0.941083	-1.00167	-0.302434	-0.940535	-0.445113	-0.998882	-0.634653	-1.46403	-1.3009	-1.51777	-1.47102	-1.0158	-1.78524	-0.901944	-1.47787	-0.594543	-1.53527	-1.54166	-1.15133	-0.755106	-1.35921	0.894727	-0.532555	-1.02196	-0.849104	-0.985663	-1.08542	-1.04868	-1.37847	-0.902218	-0.891327	-0.706755	-0.720712	-1.11098	-1.21097	-0.826369	-1.75341
ENSMUSG00000025727	A930017K11Rik	B	1.04563	0.23544	-1.53547	-1.87777	-0.516267	-1.34738	-1.54755	-1.22467	-0.161782	-0.334983	-0.455511	-0.747571	-0.863811	-0.900745	-1.58008	-0.0920765	-0.925904	-0.879688	-1.27273	-2.47035	-1.76621	-2.25094	-2.49599	-1.0516	-0.185991	0.292649	-0.615013	-1.287	-1.94502	-1.456	-1.93322	0.21623	-0.437225	-1.78125	-0.724046	-1.24489	-1.02711	-1.21151	-0.0823498	-0.485297	-0.948842	-0.455829	-1.41401	-0.330773	-0.151632	-0.616037	-1.25553
ENSMUSG00000041476	Smpx	B	-1.19976	-1.19976	-1.19976	-1.19976	-1.19976	-0.604113	-0.7883	-1.19976	-0.92283	-1.19976	-0.0871479	-1.19976	-0.476081	-0.95456	-0.489211	-1.19976	-1.19976	-0.349691	-0.239583	-0.355115	-1.19976	-1.19976	-1.19976	-1.19976	-0.1367	-0.0760635	-1.19976	-1.19976	-1.19976	-1.19976	-0.374901	0.987806	-0.793088	-1.19976	-1.19976	-0.58263	-1.19976	-1.19976	-1.19976	-1.19976	-1.19976	-1.19976	-1.19976	-1.19976	-1.19976	-1.19976	-1.19976
ENSMUSG00000004231	Pax2	B	1.14879	-0.464461	-0.200705	-1.72751	-0.045732	-0.386416	-0.321444	-1.72751	-0.842762	-1.72751	-0.823108	-1.24047	-1.00384	-0.415989	-0.543013	-1.29646	-1.72751	-0.587471	-1.02232	-1.24424	-1.72751	-0.200149	-1.72751	1.38763	-0.433277	-0.769054	-0.652482	-1.72751	-0.395271	-1.39347	-0.902657	0.657084	-0.52432	-1.40471	-1.72751	-0.990024	-0.643079	0.405913	-1.39042	0.116817	-0.798493	-1.01924	-0.595285	-0.371429	-0.305177	-1.24996	-0.984716
ENSMUSG00000073542	Cep76	B	-0.828642	-1.11149	-1.11127	-0.895971	-1.52203	-0.752973	-0.949234	-0.664423	-0.754232	-1.4004	-1.02066	-1.18732	-0.913343	-0.872899	-1.13067	-0.860204	-1.26037	-1.00185	-1.30418	-1.2201	-1.28587	-1.27695	-1.37062	-0.846784	-1.3675	-0.578631	-0.923908	-1.2103	-0.824609	-0.735315	-1.41198	0.78065	-0.968058	-0.578852	-0.844086	-0.696622	-0.891411	-0.634814	-0.647335	-0.409711	-0.679963	-0.680766	-0.488556	-1.1135	-0.914728	-0.89452	-0.992262
ENSMUSG00000004633	Chn2	B	-0.943104	-0.709825	-0.632914	-0.534642	-0.698358	-0.694718	-0.827198	-0.667575	-0.586123	-0.731507	-0.673516	-0.422777	-0.749475	-0.686697	-0.493336	-0.448483	-1.34724	-1.27573	-0.847424	-1.336	-0.925101	-0.737648	-1.201	-0.901528	-0.701096	-0.733902	-1.25488	-1.13718	-1.21456	-1.18694	-0.969492	0.49408	-1.35989	-1.58722	-1.50517	-1.42	-1.56092	-1.02276	-1.13311	-1.36255	-1.50658	-1.47168	-1.04428	-1.36146	-1.28412	-1.48847	-0.405933
ENSMUSG00000048534	Jaml	B	-1.55843	-1.20228	-0.6817	-1.55843	-0.597633	-1.55843	-1.14698	-1.55843	-1.28151	-1.32295	-1.55843	-1.55843	-1.55843	-1.10372	-0.847887	-0.795925	0.204419	-1.07168	-0.381647	-0.71379	-1.55843	-0.601414	-1.55843	-1.55843	-1.55843	-1.25298	-1.55843	-1.16813	-1.55843	-1.55843	-1.55843	-0.204846	-1.15176	-0.556234	-0.896113	-0.510451	-1.31141	0.0666814	-1.22134	-0.169258	-0.232679	-0.85016	-0.780071	-0.992867	-0.474281	-0.951357	0.326621
ENSMUSG00000025216	Lbx1	B	-0.952915	-0.952915	-0.952915	-0.952915	-0.952915	0.0630775	-0.952915	-0.952915	-0.952915	-0.952915	-0.952915	-0.952915	-0.952915	-0.952915	-0.952915	-0.952915	-0.952915	-0.952915	-0.952915	-0.952915	-0.952915	-0.952915	-0.952915	-0.952915	-0.952915	-0.952915	-0.952915	-0.952915	-0.952915	-0.952915	0.239656	0.520964	-0.546246	-0.952915	-0.952915	-0.952915	-0.952915	-0.952915	-0.952915	-0.232448	0.188067	-0.444421	-0.952915	-0.952915	-0.952915	-0.475365	-0.952915
ENSMUSG00000061524	Zic2	B	-0.582497	-0.866896	-0.832604	-1.35591	0.0562666	-0.751778	-1.77559	-1.35288	-1.14454	-1.29694	-1.32904	-0.655125	-1.47677	-0.486744	-0.613171	-1.71071	-0.464695	-0.507414	0.136458	0.126602	-0.769778	0.538749	-0.126413	0.034524	-0.396933	-0.0022532	-1.12124	-0.428481	-0.050704	-0.36662	-0.088698	0.456925	-0.948079	-1.13504	-0.906027	-0.918239	-1.05478	-0.848181	-1.17514	-1.10709	-1.17677	-1.07292	-0.269048	-0.908618	-1.01522	-1.4781	-1.22086
ENSMUSG00000018698	Lhx1	C	2.86271	2.44035	2.75648	2.85421	2.37549	2.69933	2.32615	2.87684	2.5657	2.49019	2.23206	2.18389	2.41153	2.58495	2.49263	2.36216	-1.02306	-2.78772	-2.31431	-3.27448	-3.27448	-2.88077	-2.46996	-1.17524	-3.27448	-1.86813	-2.47718	-2.57729	-2.9491	-3.27448	-1.66238	1.54987	-1.88045	-2.10211	-1.53874	-2.2265	-1.85181	-2.24426	-2.66432	-2.29513	-1.78495	-1.96474	-1.62117	-1.85231	-1.57837	-2.79693	-3.27448
78365	NA	C	1.20284	1.63339	1.82992	1.73786	1.3622	0.837813	1.96014	2.45631	1.8194	1.94794	1.55385	0.963425	1.6396	1.59506	1.7007	1.707	-2.65057	-2.65057	-1.47378	-2.65057	-2.65057	-2.65057	-2.65057	-0.461979	-2.65057	-2.65057	-2.65057	-1.95338	-2.65057	-1.81738	-2.32044	1.0983	-1.92701	-1.84133	-2.65057	-2.30925	-1.13073	-2.04539	-1.43889	-2.65057	-1.9701	-2.65057	-0.533695	-0.936937	-2.19284	-2.04349	-2.65057
ENSMUSG00000029546	Uncx	C	2.752	2.19341	2.03733	1.91637	2.37139	2.26034	2.37416	2.18885	2.09534	1.95575	2.01899	2.0847	2.01811	2.03946	2.0243	1.61534	-1.2444	-0.820104	-0.98645	-0.264763	-0.0847878	-0.893225	-1.15072	-2.28086	0.335455	-1.20852	-1.63752	0.0850852	-0.672275	-0.0055982	0.0194664	0.370746	-3.14575	-1.14246	-3.14575	-2.09777	-2.68788	-2.11554	-2.5356	-3.14575	-2.00477	-2.26203	-3.14575	-2.46772	-3.14575	-3.14575	-3.14575
ENSMUSG00000029595	Lhx5	C	3.16633	2.8016	2.77885	3.02864	2.49051	3.02315	2.62271	2.29795	2.35281	2.39769	2.18865	2.40602	2.5148	2.44741	2.61663	2.46874	-2.29614	-1.77088	-1.48596	-0.313793	-1.58578	-1.86328	-0.170649	0.103804	-0.314471	-1.69416	-1.09953	-0.569809	-0.824737	-1.24454	-1.18528	0.0317647	-2.23794	-2.73046	-2.56074	-1.89111	-2.58827	-3.20561	-2.32803	-2.34094	-2.39872	-2.83143	-1.59083	-1.62904	-2.58853	-1.73852	-3.0047
ENSMUSG00000031654	Cbln1	C	1.59649	1.57187	1.52039	1.42335	1.69203	1.58486	1.47217	1.22995	1.31481	1.46105	1.53503	1.53715	1.46636	1.39489	1.3715	1.32509	-1.99098	-2.13093	-2.52074	-3.19904	-2.34663	-2.20056	-2.11536	-2.04624	-2.09895	-1.81299	-2.39112	-2.0527	-2.03664	-2.17239	-2.13473	0.883497	-2.38314	-2.24283	-2.19548	-2.19694	-2.82215	-1.70048	-2.47827	-1.93217	-1.95862	-2.65919	-2.1425	-2.30473	-3.53611	-2.79407	-1.77156
ENSMUSG00000034384	Barhl2	C	0.539121	0.470963	0.597231	-0.88908	-0.143691	-0.282529	0.358493	1.07601	0.538955	0.611596	-0.0165105	0.451663	0.104782	0.856267	0.362246	0.458615	-0.192868	0.286575	0.958628	0.641427	0.71434	-0.0106239	1.3416	0.969551	1.18973	-0.355671	1.10718	0.43054	0.474152	0.625633	0.694008	0.157123	-2.78769	-3.77091	-3.77091	-2.63269	-3.12911	-2.27313	-2.93124	-3.77091	-3.77091	-2.88719	-3.46244	-2.55684	-3.77091	-2.73786	-3.2359
ENSMUSG00000026805	Barhl1	C	2.25284	1.84338	1.76395	1.02033	2.00579	1.10987	1.29046	2.55247	1.88904	1.8126	2.07314	1.22384	1.46533	2.13934	1.91836	1.72508	-1.22218	-1.75396	-0.559822	-2.24072	-2.24072	-0.713353	-0.721475	-2.24072	-1.45309	-2.24072	-2.24072	-2.24072	-1.42599	-2.24072	-2.24072	1.30353	-2.24072	-1.91791	-1.5784	-1.89941	-1.99369	-2.24072	-1.63056	-2.24072	-2.24072	-1.96418	-2.24072	-2.24072	-2.24072	-2.24072	-1.70572
ENSMUSG00000000214	Th	C	2.35173	2.71145	2.35299	2.74763	2.50041	2.37369	3.17712	2.69706	3.04217	2.56721	3.10227	2.49891	2.86814	2.92229	2.5257	2.39204	-3.61818	-3.02253	-2.48942	-2.13015	-2.34278	-1.37064	-2.35089	-2.80026	-0.740839	-0.343562	-2.09896	-1.23574	-1.18934	-2.26915	-1.699	-2.09403	-2.98151	-2.26978	-4.3985	-3.15642	-2.72473	-4.19759	-3.36699	-3.83863	-3.02119	-3.40594	-2.69977	-2.9891	-3.16648	-2.17047	-1.72628
ENSMUSG00000001504	Irx2	C	2.76409	2.27683	1.50131	1.45875	1.94474	1.60512	2.44178	1.92668	2.1949	1.8732	2.20304	2.02474	2.42355	1.96549	2.19034	2.26482	-2.06803	-1.58127	-1.67277	-0.934645	-1.66819	-0.540666	-1.26351	-2.06803	-1.62112	-1.29621	-1.27073	-2.06803	-0.888552	-1.46293	-2.06803	-0.380031	-2.06803	-2.06803	-2.06803	-1.11631	-2.06803	-2.06803	-1.45787	-2.06803	-1.38757	-2.06803	-0.21111	-2.06803	-1.26336	-1.73279	-2.06803
ENSMUSG00000031734	Irx3	C	2.38323	2.8923	1.51428	1.88881	2.54203	2.45202	2.48402	2.66153	2.41374	2.38065	2.56734	2.33217	2.18629	2.51388	2.08209	2.37496	-2.88278	-2.03271	-0.533028	-1.12257	-1.91333	-0.219661	-2.42515	-1.81586	-0.917476	0.212449	0.417952	-1.36473	-1.55054	-1.85268	-1.04637	0.422957	-1.09946	-1.07228	-1.64432	-1.8348	-1.02894	-2.04948	-1.84515	-2.47803	-0.990601	-1.84265	-1.12407	-0.68122	-1.27228	-1.25392	-2.13998
ENSMUSG00000010476	Ebf3	C	2.98925	2.82623	2.56476	2.92307	2.67213	2.40929	2.79737	3.27043	2.95133	2.84297	3.069	2.97842	2.92665	3.1478	2.90735	3.13374	-1.48444	-2.68631	-0.560993	-0.853258	-1.7705	-1.72226	-0.461342	0.0792254	-2.03359	-0.556661	-1.92007	-0.885455	-1.35252	-2.71318	-1.24914	-0.856946	-1.26285	-1.45128	-1.49216	-0.709758	-2.05038	-1.4487	-1.93463	-2.0738	-1.77168	-2.06952	-1.02563	-1.04923	-1.86044	-1.97545	-2.97188
ENSMUSG00000048540	Nhlh2	C	2.32048	2.13787	2.05655	2.34729	1.86196	2.15363	2.01765	2.4282	2.35706	2.04154	2.5132	2.42403	2.57177	2.41202	2.40723	2.2775	-1.47171	-1.18322	-1.12788	-1.29632	-1.89332	-1.78809	0.165512	-0.968562	-1.11819	-0.709797	-1.01519	-1.48188	-0.578642	-1.21477	-1.3687	0.0493878	-0.209648	-0.10438	-0.355474	-0.00675499	-0.228498	-0.311485	-0.195992	0.0109441	-0.439426	-0.329751	-0.14224	-0.0361542	-0.0706777	-0.535814	-3.72313
ENSMUSG00000005220	Corin	C	-2.15731	0.311553	0.968596	0.67292	1.25265	1.70648	1.41699	1.50551	1.49271	0.838568	0.869679	0.481467	1.10282	0.456691	0.943532	0.305283	-2.41094	-1.92418	-2.01568	-1.92767	-2.41094	-2.41094	-1.09298	-0.86687	-2.41094	-2.10548	-1.10311	-1.46083	-1.82024	-1.05297	-0.925598	0.0337778	-2.00427	-1.82451	-0.854101	-0.702212	-1.60604	-0.365847	-1.37331	-1.43159	-0.921414	-1.90245	-0.99477	-1.35441	-0.988603	-0.45584	-0.712844
ENSMUSG00000031737	Irx5	C	2.21706	2.37477	2.04591	1.99326	2.42789	1.69308	2.64932	2.63151	2.10538	2.12913	2.11758	1.5754	2.29408	2.2353	2.16394	2.53142	-2.33676	-0.407332	-0.52059	-0.962895	-1.14934	-1.16359	-0.341727	-2.33676	-2.33676	0.589739	-1.88372	0.0826187	-2.33676	0.0330239	-0.400051	0.165673	-2.33676	-2.33676	-1.50745	-1.38504	-1.53186	-1.30654	-1.7266	-1.61629	-1.01101	-1.02702	-0.920591	-2.33676	-1.87903	-2.00152	-1.41236
100040294	NA	C	-0.261387	0.112881	-0.170035	0.53869	0.126515	-0.32169	-0.7347	-0.0387249	0.252102	0.286062	0.040903	-0.121684	0.246475	-0.374189	0.111914	0.234686	-2.75128	-1.02731	-1.3996	-2.41491	-3.28226	-1.74231	-0.525134	-2.09281	-1.15226	-1.9714	-0.749156	-1.85164	-1.65917	-1.30077	-1.87629	0.623062	-1.18254	-0.861662	-1.59633	-1.63389	-2.141	-0.988405	-1.68794	-1.52651	-0.803299	-1.29588	-0.770828	-1.21251	-2.21791	-1.32525	-1.12986
ENSMUSG00000061859	Patj	C	0.8338	0.613973	0.745453	0.65998	0.753282	0.670067	0.565133	0.761077	0.816981	0.850564	0.927459	0.711802	0.610404	0.754242	1.13282	0.767892	-1.27641	-1.29378	-1.35149	-1.26996	-1.40371	-1.21692	-0.793687	-1.90527	-1.22237	-0.800499	-1.43678	-1.0863	-1.70073	-1.58084	-1.25263	0.439558	-1.88762	-1.99038	-1.87397	-1.7249	-1.57451	-1.64916	-1.87461	-2.0761	-2.2802	-1.91318	-0.522965	-1.89004	-2.10522	-1.98763	-1.95099
ENSMUSG00000071424	Grid2	C	-0.502048	0.556381	0.20581	0.628244	0.27807	0.630221	0.33757	0.879446	0.312897	0.476747	0.30581	0.592992	0.357674	0.370877	0.492209	0.453202	-1.18759	-0.90512	-0.986032	-0.645759	-0.967514	-0.753512	-0.559124	-1.00686	-1.04561	-0.490379	-0.607286	-0.982861	-1.18115	-0.802562	-1.12627	0.398703	-1.28577	-1.40333	-1.3492	-1.23685	-1.31316	-0.776767	-1.3358	-1.50307	-1.15942	-1.22218	-1.26425	-1.55494	-1.76319	-1.73943	-1.21414
ENSMUSG00000063239	Grm4	C	-0.0812548	-0.36277	-0.161075	-0.429282	-0.0857055	-0.500046	-0.411366	-0.0570807	-0.449539	-0.0112148	-0.424471	-0.393966	-0.664218	-0.409769	-0.269411	-0.161909	-1.14893	-1.72061	-1.45226	-1.34702	-1.33306	-1.73102	-1.69379	-2.39865	-1.47677	-0.652434	-1.15833	-1.08843	-1.32625	-1.48657	-1.2741	0.489082	-1.66419	-1.57501	-1.97768	-1.51117	-1.56941	-1.76184	-1.59961	-1.76587	-1.6239	-1.90242	-1.18245	-1.71914	-1.49963	-1.91682	-0.829834
ENSMUSG00000026452	Syt2	C	0.0399493	0.179885	0.092219	-0.143002	0.510048	0.00706843	0.048992	0.0663892	0.366607	0.279701	0.108828	0.237017	0.101696	0.0873585	0.288914	0.356885	-3.16535	-1.87716	-2.66027	-2.17851	-2.4291	-3.01903	-2.0578	-3.07727	-1.41076	-1.33149	-2.21058	-2.39712	-2.25722	-2.74626	-2.85886	0.475716	-0.505877	-0.844934	-1.39872	-0.392949	-0.77469	-1.03094	-0.573749	-0.749732	-1.11398	-1.05602	-1.34745	-1.03808	-0.833227	-0.918104	0.463241
ENSMUSG00000057777	Mab21l2	C	1.35935	0.968817	2.08826	1.94137	1.9775	2.16758	1.39104	1.77447	1.11594	1.27589	1.33457	2.03303	1.37353	1.56453	1.41848	1.74556	-2.22024	-1.0802	-2.22024	-0.846379	-1.50767	-1.26323	-1.76262	-0.818383	0.295905	-0.374698	-1.7672	-1.52305	-0.400619	-1.38706	-1.19985	-0.746366	-1.01705	-0.632351	-1.7468	-1.37167	-1.76237	-1.01678	-2.22024	-2.22024	-1.84026	-1.33652	-1.91177	-2.22024	-1.41557	-2.22024	-0.736994
ENSMUSG00000031962	Cdh15	C	0.122178	0.0910273	0.30489	-1.39676	0.481408	-0.621432	0.17008	-0.725218	-0.626645	-0.0884999	-0.303761	0.163841	-0.185937	-0.3588	-0.456688	-0.907755	0.0692457	-0.866623	-0.116004	-0.801061	-1.4724	-0.103904	-0.887041	-0.638674	-0.251883	-1.20139	-0.184002	-0.354596	-0.437175	-0.307053	-0.550848	0.610778	-0.980077	-1.03436	-0.815017	-0.896333	-0.962801	-0.955545	-1.1473	-1.60585	-1.32709	-1.08115	-1.62972	-1.3828	-0.694886	-0.547877	-2.11525
ENSMUSG00000036123	Slc9a3	C	-0.952647	0.00256616	0.342263	-0.0941999	0.509957	-1.70047	-0.5692	1.12078	-0.472637	0.1455	-0.694831	-0.526598	-0.445903	-0.783867	0.0647395	-1.26426	-2.29612	-2.29612	-0.764505	-1.16273	-2.29612	-0.93501	-2.29612	-2.29612	0.0241645	-1.33766	-1.84308	-2.29612	-2.29612	-0.671166	-1.27572	0.416531	-0.512802	-1.12375	0.0482504	-0.529659	-1.08991	-0.251024	-0.334369	-0.212537	-0.659531	-0.236336	-1.33	-0.636259	-0.87378	0.18356	-0.933616
ENSMUSG00000005357	Slc1a6	C	0.161753	0.395129	0.337779	0.29561	0.718247	0.125716	0.375587	-0.29143	0.0735599	0.125801	0.190005	0.0710019	-0.0527239	0.166946	0.211562	0.129581	-0.590727	-1.00522	-0.564326	-0.702779	-0.845896	-0.540259	-0.900007	-1.77306	-0.867331	-0.819576	-0.250296	-0.75459	-0.608443	-0.897691	-0.56013	-0.115058	-1.44539	-1.21882	-1.46085	-1.78994	-1.16644	-1.5621	-1.27113	-1.79536	-1.54271	-1.22661	-1.64684	-1.35597	-1.68862	-1.38885	-1.69221
ENSMUSG00000033740	St18	C	-0.0584658	-0.399221	-0.440406	-0.218847	-0.465642	-0.377854	-0.187919	0.0186586	-0.235906	-0.184965	-0.598939	0.076319	-0.0335689	-0.0382586	-0.210569	0.228003	-2.02577	-1.70082	-2.08337	-1.54402	-1.94021	-1.21488	-2.24393	-2.59196	-1.89011	-0.954753	-2.00664	-1.90777	-2.32956	-2.34076	-1.7386	1.27124	1.44705	1.44291	1.30738	1.2987	1.16094	1.43343	1.20573	0.990379	0.961676	1.13254	0.900823	1.2731	1.32554	0.912564	-1.14502
ENSMUSG00000027716	Trpc3	C	-0.607795	-0.910914	-0.342695	-0.659732	-0.742363	-0.624473	-0.902239	-0.527927	-0.82262	-0.602841	-0.750629	-0.526789	-0.749947	-0.795369	-0.574752	-1.15374	-1.05788	-0.635777	-1.26869	-0.978613	-2.19977	-1.53263	-1.60529	-0.345499	-1.21371	-0.512642	-1.12413	-1.20453	-0.468916	-1.1859	-0.577771	0.28429	-1.42974	-1.50463	-1.87147	-1.70693	-1.93717	-1.51041	-2.01723	-1.82121	-1.55968	-1.68643	-1.26304	-1.54861	-1.86916	-1.69282	0.0377971
ENSMUSG00000011171	Vipr2	C	0.400761	0.404078	0.913291	0.443214	0.926463	0.906131	0.555317	-0.287029	0.32946	1.0683	-0.153468	0.63934	0.55637	0.57179	0.967116	0.252322	-0.852666	-1.01567	-0.392983	-0.602822	-0.696216	-0.675078	-1.60137	-2.05138	-2.38694	-1.22128	-2.98035	-0.824544	-0.952778	-1.1459	-2.21898	-0.306522	-2.41544	-2.3519	-2.01718	-2.28892	-2.27808	-3.45021	-2.54823	-2.85662	-2.28535	-3.17166	-0.390751	-2.50948	-2.5359	-1.91768	-2.46072
ENSMUSG00000030111	A2m	C	0.0118569	0.270787	-0.110866	-0.00312739	0.019462	-0.272791	0.970018	0.413477	0.414645	0.769023	0.588814	0.434315	0.600296	0.29725	0.0515044	0.106042	-1.11113	0.18599	-1.13388	-0.763634	-0.591232	-0.585835	0.385818	0.723735	-0.48344	1.00583	-0.694775	-0.0289828	-0.676326	-0.827729	-0.310918	-0.0729994	-1.25174	-1.28674	-1.8037	-0.550129	0.889072	-1.0274	-0.968889	-1.46236	-1.11113	-0.921022	0.962884	0.0755981	-0.988178	-1.19574	-2.37153
ENSMUSG00000057098	Ebf1	C	0.176146	0.135988	1.02756	0.248858	0.411105	0.222501	0.455822	0.400096	0.395769	-0.0264365	0.187034	0.449613	0.473061	0.0737135	0.475513	0.684409	-1.1192	-0.109114	0.199784	-0.530141	-0.237914	-0.474001	-1.06377	0.0465072	0.726592	-0.238074	-1.64323	-0.30369	-0.47004	-0.378945	-1.10209	0.270046	-1.15426	-1.21905	-1.62492	-2.06465	-1.67218	-1.21484	-1.88564	-1.56563	-1.72598	-1.52215	-1.51853	-1.51037	-1.15391	-1.45657	-1.75283
ENSMUSG00000026655	Fam107b	C	-0.674305	-0.548346	-0.102373	-0.67383	-0.946402	-0.251904	-0.297561	-0.475934	-0.216179	-0.458351	-0.19435	-0.359655	-0.241057	-0.226801	-0.311379	-0.221033	-1.40499	-1.3502	-1.1809	-1.25471	-0.72823	-0.59643	-1.35772	-0.918394	-0.877136	-1.09471	-1.5693	-1.32305	-1.06563	-1.01683	-1.12439	0.693349	-0.164764	-0.386565	-0.355402	-0.423659	-0.428167	-0.322904	-0.528912	-0.223127	-0.389087	-0.552326	-0.164808	-0.245479	-0.31674	-0.376363	-1.09735
ENSMUSG00000050063	Klk6	C	1.46961	1.00501	-0.244479	0.181995	0.958752	0.863996	0.628394	0.754874	0.8831	0.790832	0.777933	0.444332	0.49841	0.675752	0.599539	0.806414	-3.839	-1.20283	-3.44374	-2.46514	-2.145	-1.79019	-3.38138	-1.14418	-1.51872	-0.868438	-2.53117	-2.17238	-2.36864	-0.880341	-2.22691	0.130545	-0.929724	-2.02851	-0.949749	-1.33543	-1.77727	-0.698635	-1.25379	-1.99467	-1.72978	-1.85425	-0.347029	-2.62493	-1.33637	-1.50142	0.28089
ENSMUSG00000022053	Ebf2	C	0.827138	0.912496	0.938469	1.64014	0.701118	1.10784	0.76032	1.82658	1.23451	1.12639	1.81785	0.884911	1.08113	1.50239	1.4805	1.38914	-0.377604	0.444981	0.520351	0.556918	0.488679	-0.0659621	-0.486381	-1.48499	-1.06064	-0.0456989	-0.617947	-0.48783	0.0404309	-0.77826	-0.0511182	-0.226646	-2.72908	-2.14265	-2.25564	-0.802115	-2.48205	0.533842	-2.72908	-2.32433	-2.34909	-2.22058	-0.201037	-0.773094	-2.72908	-2.25153	-1.36658
ENSMUSG00000021903	Galnt15	C	0.201667	-0.922495	0.418807	-2.34999	0.192765	-0.73461	-0.0388082	0.539798	0.0997856	0.038979	-0.0080846	-0.196602	0.113208	0.254627	-0.453607	-0.0413655	-1.14675	-0.588421	-1.24452	-1.04643	-0.757809	-0.106066	-0.558937	1.31854	-0.482292	-0.0854903	-0.125962	-0.231057	0.382977	-1.71757	-1.40805	0.10094	-1.28773	-1.58914	-0.873226	-0.591393	-1.2594	-1.06821	-0.998926	-0.577179	-0.775063	-0.92915	-1.29533	-1.19696	-0.779267	-1.2828	-1.63581
ENSMUSG00000060969	Irx1	C	1.53172	1.37901	1.3132	0.588937	1.96282	1.5107	0.988452	1.7086	1.05841	1.06056	1.05073	1.20458	1.04561	1.24688	1.13093	0.83883	-0.451999	-0.584168	-1.06103	-0.191349	-0.215666	0.159967	0.148714	-0.199362	-1.12676	-0.705291	-0.286652	0.189843	-0.505374	0.589795	-0.18483	-0.608973	-1.43702	-2.04797	-1.18214	-2.60321	-2.26891	-0.924983	-1.71318	-1.83116	-1.58375	-1.91059	-1.36342	-1.30968	-1.0354	-2.09791	-1.85784
ENSMUSG00000010080	Epn3	C	0.304848	0.631642	0.392534	-0.438358	0.515433	0.0845493	0.0690638	0.344369	0.181546	0.781009	0.0775832	0.545424	0.327601	0.446377	1.05858	0.0853455	-2.78931	-1.59612	-1.87357	-1.71699	-1.42175	-0.888153	-2.71492	0.376965	-1.51672	-4.03287	-2.34871	-1.12135	-1.49513	-2.53524	-0.909605	-0.0032011	0.220513	-0.537014	0.159682	0.533167	1.67747	0.110957	-0.156398	-1.13038	0.221092	-0.0519548	1.73898	0.120843	-0.0903582	-0.0291695	-1.51839
ENSMUSG00000030110	Ret	C	2.11375	2.40302	1.80299	2.36486	2.11143	1.9939	2.3987	2.42918	2.60771	2.25093	2.60871	2.30251	2.43314	2.53312	2.34184	2.01692	-1.48847	-1.68631	-0.833921	-0.784104	-1.09143	-0.399614	-0.873612	-1.11216	-0.818875	-0.672101	-0.626239	-0.727713	-1.56477	-1.37384	-0.833238	-0.904079	-1.1811	-2.44279	-1.73085	-1.32464	-1.56039	-1.73239	-1.78115	-1.7556	-1.75471	-1.8643	-1.68179	-2.13551	-1.64081	-1.57275	-1.61095
ENSMUSG00000041703	Zic5	C	-0.394386	-1.09566	-0.651259	-0.747856	-1.20842	-0.850223	-0.951987	-3.3713	-0.735741	-1.1018	-1.04979	-0.64039	-0.737869	-0.713638	-0.315033	-1.32349	-0.522968	-0.910564	-0.25206	0.0966799	-0.234583	0.0989055	-0.183771	-0.299217	-0.396885	0.782301	-1.89574	0.169234	0.0205429	0.265507	0.309911	0.588527	-0.284604	-1.23055	-0.683257	-0.644264	-0.508227	-0.615173	-0.602191	-0.456435	-0.426051	-0.772725	-0.617738	-0.47219	-0.796154	-0.375689	-0.926848
100502933	NA	C	0.170926	0.587096	0.344017	0.24742	1.12995	0.538309	0.804357	0.907646	0.870474	0.445201	0.598827	0.354885	0.786766	0.715937	0.896281	0.395979	-2.88282	-1.50144	-2.88282	-1.74943	-1.6954	-1.35545	-1.79886	-2.53375	-0.789237	-0.492	-1.57499	-0.549757	-1.2864	-0.587655	-1.15421	-0.695256	-0.969102	-0.486943	-2.62676	-0.955854	-1.18634	0.169655	-1.51585	-1.03849	-1.9538	-1.346	-0.296347	0.0201359	-0.758363	-0.879856	-0.368338
ENSMUSG00000028661	Epha8	C	0.841353	0.644807	0.305308	-0.28586	0.652897	0.937523	0.307134	0.812638	0.694857	0.69748	0.0100949	0.111505	0.288469	-0.136706	0.355128	-0.223505	-1.96779	-1.86843	-0.930655	-1.28533	-1.3738	-1.33504	-1.57101	-0.622157	0.012412	-1.25779	-1.3144	-0.796564	-0.520132	-0.566041	-0.880854	-0.300368	-1.77271	-1.69555	-1.53979	-1.55138	-1.38924	-1.30937	-1.63157	-2.03782	-1.73189	-1.69154	-0.948385	-1.32404	-1.6364	-1.12826	-0.995586
ENSMUSG00000036872	Abcc12	C	-2.38101	-1.73945	0.257372	-0.466472	-1.20351	-0.774762	-0.805614	0.359265	-0.646472	-1.00488	-0.647773	-0.611489	-0.98679	-0.69258	-1.19651	-1.94995	-2.38101	-0.999633	-1.01593	-0.316375	-0.108288	-0.332198	0.341287	-0.108292	-0.169629	0.500034	-1.58371	-1.68382	-1.37241	-1.17768	-0.652403	-0.193446	-1.39779	0.0148665	-0.645269	-1.00169	-0.1376	-0.0856536	0.204204	-0.297429	-0.610974	-1.07127	-1.81855	-0.381082	-0.256553	-0.526676	-2.08885
ENSMUSG00000042671	Rgs8	C	-0.817827	-0.759742	-0.675666	-0.531977	-0.700574	-0.823793	-0.803586	-0.820473	-0.631332	-0.61327	-0.703962	-0.531572	-0.794322	-0.709294	-0.38135	-0.586568	-1.11697	-0.824205	-0.938145	-1.08178	-0.902294	-1.22128	-0.909693	-1.0324	-0.695853	-0.778438	-0.857523	-0.868856	-0.912897	-1.19528	-1.08326	0.566758	-0.40091	-0.489662	-0.485223	-0.390777	-0.456448	-0.619267	-0.314856	-0.439281	-0.682583	-0.437663	-0.342552	-0.579984	-0.223091	-0.382095	-0.908782
100040525	NA	C	0.174122	-0.621689	-1.0867	-1.3151	-1.25833	-1.16959	-0.590912	-0.822912	-0.816157	-0.857321	-0.68871	-1.19058	-0.671398	-0.803843	-0.636483	0.125823	-0.678029	-0.880849	-0.848427	-0.891087	-0.98335	0.0657495	-0.313475	-1.41778	-1.30564	-0.421792	-0.583332	-1.8504	-0.644241	-1.00866	-1.23702	-0.000518441	-0.431373	0.241938	-0.518552	-0.203564	-0.372351	-0.464545	-0.810496	-0.745252	-1.13336	-0.152949	-0.820342	-0.709747	-0.342678	-0.459679	-1.00254
ENSMUSG00000069372	Ctxn3	C	0.523636	-0.048796	0.476	0.386525	-0.287775	0.000780085	0.267455	0.832227	0.727906	0.629955	0.202907	0.352251	0.868857	0.344228	0.843624	0.662816	-1.01786	-0.894233	-1.1892	-1.00642	-0.789124	-1.39601	-0.372297	-3.50836	-1.39481	-0.60941	-1.59813	-1.33915	-1.30865	-2.35837	-0.905712	-0.172585	-2.27397	-1.34793	-1.65789	-0.54444	-2.21187	-0.6204	-1.77653	-2.03008	-1.48588	-2.50165	-1.25819	-1.10766	-2.25044	-2.35348	-1.63933
ENSMUSG00000001435	Col18a1	C	0.406382	0.479155	-0.0240081	0.693979	0.0956997	0.571404	-0.229078	0.375755	0.0668625	-0.0478368	-0.342209	-0.00329782	-0.188943	-0.153705	0.134017	-0.196657	-0.11985	-0.703084	-0.448007	-0.475123	-0.667574	0.637195	-0.392184	-0.656365	0.612931	-1.05961	-0.498485	0.06078	0.164523	0.265301	-0.0998392	0.0292659	-1.55208	-1.33159	-1.14681	-1.34675	-0.932476	-1.57297	-1.32159	-1.94601	-1.37234	-1.69928	-0.794485	-1.07381	-1.52051	-1.50044	-1.51301
ENSMUSG00000055214	Pld5	C	0.78319	0.72424	0.952615	0.827763	0.692912	0.879452	0.838049	1.19474	0.830913	0.73232	0.995955	0.962123	1.01827	0.927386	1.0372	1.02793	-1.17915	-1.38054	-0.13833	-0.81149	-0.40893	-0.526863	-0.645269	-1.30028	-0.342311	-0.267938	-0.126864	-1.40625	-1.03422	-1.21796	-0.393959	-0.229993	-1.96507	-2.31469	-2.36349	-1.61508	-1.45508	-2.12307	-2.96193	-2.60172	-2.29531	-2.07326	-1.6587	-1.90142	-2.25972	-2.60795	-0.406144
ENSMUSG00000000125	Wnt3	C	0.435328	0.59121	-0.472928	-0.458872	0.998021	0.279832	-0.382044	0.306422	0.416489	0.576358	0.740996	0.187713	-0.153982	-0.349653	1.05864	0.352826	-1.51593	-1.24245	-2.67837	-3.36534	-1.32495	-1.62016	-1.85776	-2.96589	-1.29616	-1.88553	-1.76981	-1.29846	-1.67223	-2.35982	-2.48137	0.197447	-0.559264	-0.398543	-0.640041	-0.422168	-0.320501	-0.271497	-0.2827	-0.832595	-0.438541	-0.0998892	0.569373	-0.550144	-0.357826	-0.811104	-0.680133
ENSMUSG00000021572	Cep72	C	-0.197687	-0.796238	-0.417751	-2.9427	-1.22789	-0.550802	-0.42152	-0.0262211	-0.743409	-1.0023	-0.174111	-0.403732	-1.10367	-1.28874	-0.415933	-0.787961	-0.546387	-1.99061	-0.840281	-0.549684	-0.632581	-1.06608	0.11565	0.0328796	-0.245543	-1.25423	-1.24006	-0.667153	-1.56579	-1.44543	0.0434662	0.0457415	-0.287102	-0.148423	-1.18016	-0.614058	-0.738111	0.477476	-1.12592	-0.806906	-1.11403	-0.879714	-1.24162	-0.58599	-0.595459	-1.00092	-0.627427
ENSMUSG00000037977	6430571L13Rik	C	-1.28313	-0.0814733	-0.0357288	0.246118	0.228511	-0.312112	-0.356597	-1.1221	-0.160976	0.0975994	-0.289004	0.069729	-0.410997	-0.654799	0.0724135	0.0368003	-0.919906	-1.11143	-1.2983	-0.740262	-0.959583	-1.30434	-1.67739	-3.30536	-0.68252	-2.52428	-1.46112	-0.779256	-1.17474	-1.55141	-1.63459	-0.143527	-1.60488	-1.84578	-1.52771	-1.09042	-1.48819	-1.37001	-1.41456	-1.55077	-1.49486	-1.39243	-0.840787	-1.90238	-1.4452	-1.08223	-0.738046
ENSMUSG00000020732	Rab37	C	-0.00724857	-0.556473	-0.576112	-0.0560088	0.16069	-0.733566	-1.06138	-0.567192	0.163075	0.00249835	-0.236419	-0.21012	-0.556044	-0.513872	0.744419	-0.0815238	-2.85377	-1.65205	-2.93178	-2.03659	-1.34825	-1.17276	-2.94415	-3.06153	-1.23816	-1.89002	-3.15556	-1.96257	-1.40392	-2.72145	-1.42788	-0.14958	-0.495028	-1.13751	-1.06885	-0.732449	-0.832033	-0.430022	-0.93626	-1.08601	-0.660467	-1.15978	0.401066	-0.564308	-0.854432	-0.544476	-0.608566
ENSMUSG00000021848	Otx2	C	-0.9697	0.44872	0.516994	-0.545061	-0.775837	-0.931895	0.362778	-0.688512	0.836964	0.275857	0.883328	0.04832	0.345406	0.179673	0.227851	0.252154	-3.12662	-0.490451	-3.12662	-1.75276	-2.41405	0.456147	-0.577529	1.01889	-2.33899	-0.200122	-1.61839	-0.707243	-0.865137	-3.12662	-0.846618	0.444845	0.188741	-0.122776	-0.728111	1.2204	2.37953	0.319921	0.0265966	-1.15771	0.157078	-0.0938871	2.32989	0.947108	0.70676	0.236023	-2.04095
ENSMUSG00000003657	Calb2	C	1.39642	1.35234	1.37152	1.1399	1.60045	1.3093	1.12131	1.24171	1.16328	1.35586	1.40951	1.47411	1.28677	1.29951	1.42189	1.37976	-0.868009	-2.03545	-0.70759	-0.903752	-1.01707	-0.79688	-1.32232	-1.01357	-0.994684	-0.875077	-0.912029	-0.948782	-1.33467	-0.987356	-0.886957	-1.71627	-1.90933	-1.36907	-1.42814	-1.61937	-1.66004	-1.23157	-2.25439	-1.77445	-2.5213	-2.28832	-2.12526	-1.2305	-1.83257	-1.54618	-3.36635
ENSMUSG00000020160	Meis1	C	-1.27894	-0.296441	-0.395274	-0.743481	0.0524789	-0.294952	-0.385483	-0.196062	-0.439439	-0.413363	-0.402784	-0.00362847	-0.42265	-0.206089	-0.195382	0.164308	-1.11219	0.40391	-0.0164056	0.0518667	0.208236	0.353074	-0.252529	-0.536283	0.925918	0.168169	0.298545	-0.107489	-0.0826978	0.0154979	0.030199	-0.240505	-1.86121	-2.5263	-2.20256	-2.19107	-1.84915	-1.47522	-2.67182	-1.67611	-1.76979	-2.6107	-2.85943	-1.43534	-2.81051	-2.54038	-1.6404
ENSMUSG00000040258	Nxph4	C	2.43944	1.89077	2.15002	1.91977	1.87444	1.74661	1.7413	2.24799	2.03737	1.7545	1.72308	1.53425	1.7293	1.71179	1.74365	2.06084	-0.462866	-0.00848769	-0.46494	0.458873	-0.035872	0.122969	0.112823	0.726608	1.08146	0.0768504	0.22411	0.536112	0.637727	-0.44089	0.290588	-1.65607	-1.99463	-2.96056	-2.71405	-2.44201	-2.24256	-2.09351	-2.38493	-2.2777	-1.65011	-2.65747	-3.70312	-2.70575	-2.80704	-2.60051	-1.91325
ENSMUSG00000075304	Sp5	C	0.57652	1.08669	0.0324665	0.579513	-0.329485	0.62357	-0.286545	-1.35515	-0.222191	-0.216882	-0.405898	-0.273213	-0.65857	-1.06201	-0.321282	-1.86194	-1.86194	-0.721897	-0.901766	-1.0173	-0.4852	-0.904921	0.687152	-1.86194	-0.368502	0.319839	-1.86194	0.379309	-1.86194	-0.364313	-0.841542	0.325623	-0.764547	-1.27551	-1.86194	-1.37614	-0.655733	-0.831721	-1.02227	-1.86194	-1.86194	-1.15367	-1.55347	-0.439767	-1.22033	-0.739512	-1.56978
ENSMUSG00000027208	Fgf7	C	0.64186	0.350479	-0.185507	-2.13308	-0.199618	-0.520183	0.303304	0.54676	0.13666	0.132009	0.475953	0.0348864	0.0238006	0.245528	-0.255555	0.165679	-1.24284	-1.07626	-1.06585	-2.16105	-0.831614	-1.32927	-1.48645	-1.76161	-2.55878	-0.220099	-2.20839	-1.84046	-1.82621	-0.960782	-0.804162	0.332103	-0.160341	-0.358145	-0.276239	-0.682718	-0.282632	0.0913977	-0.42048	0.016652	-1.23566	-0.260538	0.218316	-0.730763	-0.242848	-0.142146	-0.549032
ENSMUSG00000030089	Slc41a3	C	1.01439	0.924354	0.772883	0.0477557	0.969154	0.329263	0.559201	0.524681	0.554911	0.847331	0.579912	0.633118	0.514328	0.3331	0.803118	0.652425	-2.87395	-1.31419	-1.33129	-0.521199	-0.824902	-0.893458	-1.19822	-0.398941	-1.30307	-0.117537	-0.81327	-0.841167	-0.816769	-1.23894	-1.79641	-0.152255	-0.935558	-1.762	-1.37739	-1.12546	-1.05591	-1.36244	-1.54234	-1.94089	-1.36151	-1.13309	-1.35867	-1.10119	-1.43033	-1.19839	-1.28373
69248	NA	C	-0.412771	-0.419297	-1.75246	-1.45103	0.531591	0.595923	-0.990378	-0.65192	-0.816303	-1.27041	-1.14144	-0.670965	-0.71775	-0.398915	-0.164699	-1.51584	0.095008	0.00160169	0.419716	0.257423	-0.558698	0.768595	0.430417	0.28594	-0.179174	0.486551	-1.02832	-0.593478	0.180412	-0.300665	0.146428	0.30005	-1.08862	-1.23793	-0.431067	-1.2794	-0.968238	-2.06559	-0.453481	-1.47979	-1.26552	-0.607123	-0.166147	-0.940522	-1.15906	-1.4692	-1.4367
328399	NA	C	-0.433118	0.411931	0.33122	0.926979	0.449799	0.504585	0.573139	-0.355336	0.34744	0.0670309	-0.191385	-0.570841	0.323012	0.0768889	-0.382915	0.259808	0.0654298	-2.24299	-0.787792	-2.00917	-2.98319	-0.344495	-2.29908	-2.51814	-1.8896	-3.07758	-1.2719	-0.357039	-1.04737	-0.632025	-1.54663	0.161211	-0.537682	-0.334778	-1.56553	-0.688905	-0.542471	0.400274	-0.676511	-0.832659	-1.17641	-0.0189639	-0.634259	-0.39035	-0.333258	-0.655317	-0.51806
ENSMUSG00000036972	Zic4	C	0.388797	-0.25788	0.592809	0.391856	0.686117	-0.365179	-0.0123509	-0.430533	0.147802	-0.449662	-0.170417	0.74103	-0.526594	0.621054	0.124854	-0.487819	-1.62598	0.203632	-1.46791	-0.388242	-1.31396	-1.29421	-0.723554	-0.116379	-1.23613	-0.422438	-2.87639	-1.18592	-0.571884	-1.37836	-1.63729	-0.0231602	-1.28858	-0.782499	-1.124	-0.746491	-0.961093	0.317893	-1.65212	-2.16697	-0.8836	-1.05964	0.425429	-0.750264	-1.29675	-1.19838	-1.1875
ENSMUSG00000040666	Sh3bgr	C	-1.33067	0.153984	0.572368	0.171614	0.21147	0.542251	0.27168	0.58136	-0.0634568	0.219096	-0.123171	0.0782893	0.026172	0.0434177	-0.0889182	0.478211	-3.48759	-1.55816	-2.12251	-2.3542	-0.22114	-1.55255	-1.79174	-0.0842133	-1.52229	-0.972543	-0.553904	-1.3444	-1.5681	-1.35435	-1.55088	-0.0576775	-0.891339	-0.898966	-1.0369	-0.917659	-0.609895	-0.577898	-0.0628209	-1.19885	-0.394505	-0.382222	-0.460467	-0.782801	-0.6856	0.0148145	-1.36092
104103	NA	C	0.761877	-0.320426	0.0669152	0.0277122	-0.678317	-1.60312	-0.514678	0.1659	-0.119466	0.428657	-0.549923	-0.544419	-0.231196	-0.125625	0.491435	-0.837737	-2.61911	-0.85029	-1.0875	-1.03918	-1.24237	-0.274582	-2.61911	-0.945599	-1.55605	-2.06171	-0.77816	-1.669	-0.212893	-2.28507	-1.59871	-0.362835	-0.585808	-0.528285	-1.64015	-0.692146	-0.841807	-0.768777	-0.166352	-0.6502	-0.412488	-0.797242	-0.965798	-0.0535929	-0.923001	-1.89318	-0.222683
ENSMUSG00000021636	Marveld2	C	0.196927	-0.56262	-0.17557	-2.52122	-0.35112	-0.129323	0.151802	-0.245743	-0.891455	-0.418728	-0.271035	0.140655	-0.861969	-0.617014	-0.100807	-0.88505	-1.12948	-1.77582	-1.34102	-1.23676	-1.46319	-0.494078	0.537129	0.942984	-1.66376	-1.88526	-1.31624	-0.1312	-0.61945	-0.940722	-0.479234	0.467221	-0.600317	-0.246495	-0.158727	-0.653616	-0.316632	-1.02377	-1.19545	-0.868454	-1.26502	-0.505958	-0.629152	-1.44357	-0.858404	-0.896273	-0.958211
ENSMUSG00000002324	Rec8	C	1.52245	1.48802	1.01437	1.42406	1.07804	1.14827	1.10939	1.20925	1.0181	0.734978	1.09738	0.590577	0.898946	0.842772	1.38854	1.10362	-1.17742	-0.831393	0.283174	-1.00702	-1.17209	0.633926	-0.728406	-3.37952	0.154425	-1.48655	-0.15695	-0.901144	0.0721546	-0.0411377	0.387418	-0.6456	-1.71426	-2.19126	-2.45623	-1.92533	-1.25744	-1.82981	-2.46781	-1.39095	-2.12149	-2.17755	-1.6558	-2.32192	-1.68364	-1.39304	-1.11133
ENSMUSG00000028463	Car9	C	0.0564522	0.756786	0.510651	0.786471	0.307211	0.0532336	0.92398	0.518974	0.991858	1.17297	0.396033	0.460131	0.996773	-0.0886974	0.0970896	0.496787	-0.822649	-0.663456	0.00402965	-1.29889	0.785482	-1.47526	-2.43228	-2.43228	-2.43228	1.0145	-1.97923	-1.48217	-0.719941	-1.07431	0.647778	-0.0476786	-0.582287	-1.10771	-1.45332	0.00175011	-0.133059	-0.934494	-0.925121	-0.724307	0.608943	-0.447523	-0.0287092	0.0112516	-0.247337	-2.43228	-1.06977
ENSMUSG00000052861	Dnah6	C	0.655743	1.40964	1.2259	1.23322	1.13289	1.60278	1.76988	1.45405	1.60058	1.41302	0.705911	1.20808	1.51005	1.19404	0.742415	0.93486	-1.36196	-0.458177	-0.160082	-0.389654	0.499816	-0.435743	-4.3973	0.843159	-2.33877	0.107785	-1.17623	-0.728479	-1.13865	-0.868444	0.115013	-0.447499	-0.60154	-0.528822	-1.02648	0.219595	0.28162	0.765894	-0.276016	-0.54868	0.133098	-0.95337	0.479038	0.267654	-0.174441	-1.13643	-1.50395
ENSMUSG00000044505	Lingo4	C	0.921011	0.835106	1.00512	1.31177	0.874656	1.37262	0.486659	1.24379	0.651296	1.05998	0.131951	0.677524	0.811361	0.987034	0.603474	0.59336	0.129938	-0.946961	-1.33277	-0.243622	-0.451336	-1.59618	0.197092	-1.72854	-1.06123	-0.346112	-0.934002	-1.92021	-1.17202	-0.578548	-1.07108	-0.661246	-1.23931	-0.876736	-1.45511	-0.874661	-1.0292	-0.578345	-0.350354	-1.56464	-1.38043	-1.84487	-1.07855	-0.997681	-0.677925	-0.726813	-1.14594
ENSMUSG00000040146	Rgl3	C	-0.16731	-0.245314	-0.58441	-0.567599	-1.49027	-0.562015	-0.72126	-0.687285	-0.522295	-0.532377	-0.94792	-1.12823	-0.686864	-0.523461	-0.770862	-0.730754	0.273656	-0.96638	-0.517161	-0.0878849	-0.293009	-0.816853	-1.2255	-0.449316	-0.590804	-0.329065	-1.37556	-0.972624	-0.632553	-0.86761	-0.62981	-0.122804	-0.864918	-0.851121	-0.991179	-1.47043	-1.04373	-0.844241	-0.975513	-0.977868	-0.535273	-0.803264	-0.256965	-0.426164	-1.00693	-1.14486	-1.00057
ENSMUSG00000024420	Zfp521	C	0.0265895	0.438546	0.602736	0.601381	0.550649	0.574711	0.457012	0.363983	0.294758	0.631765	0.36236	0.429248	0.454703	0.607669	0.367499	0.605729	-0.895359	-0.788648	-0.533395	-0.497202	-0.52741	-0.665803	-0.685011	-0.65362	-0.451125	0.0728918	-0.997318	-0.528717	-0.771539	-0.922586	-0.772819	0.169497	-0.891364	-1.01856	-0.987355	-1.25439	-1.02143	-1.08214	-1.13075	-0.963539	-1.24281	-1.49732	-0.573088	-1.17183	-0.8957	-1.25645	-1.14019
ENSMUSG00000041235	Chd7	C	-0.694591	-0.371704	-0.420718	-0.467834	-0.208282	-0.442875	-0.298848	-0.310192	-0.370644	-0.376884	-0.418315	-0.733758	-0.673992	-0.464511	-0.686836	-0.657417	-1.34337	-1.0493	-0.685443	-1.16291	-0.91071	-0.784585	-1.0048	-0.901459	-1.09661	-0.613608	-1.31478	-1.06684	-0.820991	-0.992076	-0.936343	0.371755	-0.558852	-0.409771	-0.625676	-0.618273	-0.846891	-0.581704	-0.248358	-0.707854	-0.511105	-0.464594	-0.436897	-0.497363	-0.285068	-0.494154	-0.914352
ENSMUSG00000020140	Lgr5	C	0.417241	-0.451772	-0.123271	0.215572	-0.372608	-0.145813	-0.101335	-0.146	-0.238286	-0.62108	0.314556	-0.0154331	0.0201361	-0.13975	0.194243	-0.103262	-1.23726	-0.594463	-1.28703	-1.35638	-1.32441	-2.45034	-1.06941	-0.405183	-0.299849	-1.33052	-0.837092	-1.41548	-1.41623	-0.575241	-0.647501	-0.955461	-1.60692	-2.38208	-1.88432	-1.75201	-1.70371	-1.57938	-2.32929	-0.963716	-1.84405	-2.56351	-1.4452	-1.62843	-2.14239	-1.26159	-1.13291
ENSMUSG00000028718	Stil	C	-0.851963	-0.499418	-1.69147	-1.32282	-0.829566	-0.854336	-0.981238	0.498673	-1.31068	-1.27972	-0.341311	-0.606707	-0.105623	-0.277498	-0.369365	0.0767107	-0.432581	-0.814058	0.154316	0.000288513	-0.0213544	-1.02227	-0.877478	-2.19543	-2.19543	-0.349887	-1.74239	-0.270936	-0.012152	-1.36224	-1.00286	0.189164	-0.714693	-1.19323	-0.737116	-1.24371	-2.19543	-0.45332	-0.983759	-1.47497	-1.26641	-0.557211	-2.19543	-1.5174	-0.877259	-0.833942	-0.600765
ENSMUSG00000032194	Kank2	C	-0.847233	-0.488437	-0.506689	-0.629087	-0.550374	-0.813322	-0.443771	-0.751042	-0.595758	-0.595152	-0.950662	-0.997716	-0.766666	-0.476855	-0.844478	-0.991968	-0.387234	-0.232179	-0.570166	-0.0512304	-0.520671	-0.103965	-0.250393	-0.170505	-0.597402	-0.078808	-0.919362	-0.398972	-0.180451	-0.733286	-0.763605	0.0308592	-0.804241	-0.816638	-0.860312	-0.736862	-0.517643	-1.0113	-0.976309	-1.14128	-0.847917	-1.04199	-0.88255	-0.513367	-0.834468	-0.841247	-0.839621
ENSMUSG00000015202	Cnksr3	C	-0.324728	-0.488989	-0.614761	-0.344441	-0.74022	-0.546157	-0.629552	-0.19725	-0.413425	-0.585311	-0.473727	-0.671052	-0.457454	-0.616869	-0.560277	-0.668969	-1.01651	-0.691775	-0.774187	-0.894751	-0.913157	-0.653798	-0.678006	-0.00846045	-0.644981	-0.48637	-0.933014	-0.319314	-1.01428	-1.30805	-0.842879	0.209438	-1.00163	-1.36027	-0.829525	-0.886233	-0.379905	-0.589495	-0.959537	-0.703659	-0.65085	-0.680837	-0.299143	-0.753182	-0.894925	-0.736379	-0.617357
ENSMUSG00000038963	Slco4a1	C	-1.33437	-0.235634	-0.206517	0.329793	-0.807467	0.136882	-0.596055	-0.403279	-0.243266	-0.281896	-0.0705378	-0.226954	-0.650143	-0.206828	-0.295216	-0.847456	-0.478133	-0.571262	-0.933546	-0.381936	-1.43469	0.259502	-0.505706	-1.03291	-0.581391	0.00942938	-1.78467	-0.827597	-0.548954	-1.13755	-0.609929	-0.232343	-1.31957	-0.792154	-1.39314	-1.06558	-0.801393	-0.773276	-1.00514	-1.41724	-1.27851	-1.25022	-1.2106	-1.5374	-1.17553	-1.59201	-0.681876
ENSMUSG00000051029	Serpinb1b	C	1.88132	1.4707	1.64866	1.86837	1.72654	1.43358	1.53539	1.15095	1.51557	1.14167	1.28805	1.98963	1.81417	1.60658	1.60137	1.18844	-1.99727	-0.2733	-0.983162	-0.21184	-0.629709	0.00278542	-3.24083	-1.05224	-1.27553	0.538813	-1.933	-0.270937	-0.703086	-1.29001	-0.117564	0.383585	-1.26608	-1.23753	-0.952716	-0.737251	-0.223481	-0.7999	-1.27908	-0.61282	-0.699503	-0.798039	-0.0923821	-0.292313	-1.11637	-1.61197	-1.11416
ENSMUSG00000053399	Adamts18	C	0.0703507	0.235652	0.229614	-0.0958406	-0.631859	0.498667	0.518239	-0.302661	-0.0718343	-0.243246	-0.341105	-0.32861	0.303674	-0.243973	0.200791	0.0789081	-0.346572	-0.140975	0.0327074	-0.481047	0.379057	0.567529	-0.636258	0.297391	0.134172	-0.467367	0.897204	-0.255644	-0.838666	-0.579365	0.687687	-0.418107	-0.766016	-1.11249	-0.587	-0.968713	-1.66063	-1.06796	-1.93078	-1.5936	-2.11218	-1.90112	-1.78462	-2.15111	-1.31348	-1.21693	-0.712889
ENSMUSG00000042631	Xkr7	C	0.357922	0.22943	-0.654099	0.533996	0.164109	0.581826	0.0403028	0.609677	0.0246181	-0.126098	-0.188929	-0.200569	0.326838	0.25365	-0.254535	0.141309	0.116583	-0.285168	-0.93529	-0.581072	0.0780177	-1.05127	-1.01708	-0.211986	0.112323	-1.77876	-1.09995	-0.463959	0.425675	-0.393968	-0.411494	-0.192408	-1.39905	-1.86029	-1.26254	-1.4637	-1.39459	-1.66366	-1.32711	-1.33196	-1.64997	-1.2003	-1.44716	-1.32884	-1.48424	-1.89593	-0.0710203
ENSMUSG00000039943	Plcb4	C	0.814373	0.689438	0.819837	0.804316	0.56991	0.644504	0.676058	0.782047	0.925165	0.888569	0.774731	0.958501	0.914582	0.833549	1.16692	0.79443	-1.76749	-1.09831	-1.18695	-1.38333	-1.09923	-1.03403	-1.11096	-1.39237	-1.06916	-1.02846	-1.0014	-1.20364	-1.25366	-1.67826	-0.980096	-0.386516	-1.51915	-1.6023	-1.62791	-1.45218	-1.72691	-1.69635	-1.83774	-1.96404	-1.87324	-1.8095	-0.98166	-1.75718	-1.85809	-1.92035	0.0297375
ENSMUSG00000045094	Arhgef37	C	0.0274385	-0.306705	0.295869	-0.291785	-0.0315809	0.384341	0.187121	0.150941	0.268055	-0.0189475	0.176921	-0.77442	0.0117034	-0.408806	0.161915	-0.742617	-2.46264	-1.53237	-1.55431	-1.75638	-0.758715	-0.153939	-0.258247	-1.15203	-1.15845	-0.899544	-1.07055	-0.580138	-1.01279	-1.8558	-1.03676	0.0338527	-1.40035	-0.898438	-1.2607	-0.901181	-0.728703	-1.56371	-0.647499	-0.65061	-1.53094	-0.768656	0.271844	-1.14635	-0.868398	-0.655615	-0.333936
ENSMUSG00000036913	Trim67	C	0.0557748	0.267163	0.198158	0.00645759	0.417892	-0.251179	0.250183	0.181044	0.267189	0.460187	-0.0255314	-0.0306714	0.242735	-0.0352287	-0.0784435	-0.127309	-0.578818	-1.07903	-1.20612	-1.09087	-1.11458	-1.08336	-0.853616	-0.264709	-1.03861	-0.416265	-1.57308	-0.353243	-1.03447	-1.19999	-0.696055	-0.0288104	-1.01099	-1.13499	-1.19626	-1.34356	-1.0302	-1.3561	-1.69962	-0.870783	-1.21008	-1.10641	-0.9279	-1.07144	-1.17979	-1.3646	-1.08901
ENSMUSG00000034161	Scx	C	0.469368	0.988762	0.335224	-0.393598	1.29355	1.10096	0.817631	0.327126	0.170594	0.710207	0.787323	1.051	0.477736	0.748352	-0.288742	0.569442	-0.721065	-0.57561	-0.0799334	-0.783438	-2.43569	-1.4679	-2.11657	-3.81243	0.0391081	-0.931385	-0.310373	-1.31161	-0.211736	-1.00664	0.00653408	-0.443268	-1.17785	-1.3494	-1.64386	-1.74104	-1.56902	-2.31465	-1.58439	-1.9681	-1.60581	-1.82767	-1.47537	-0.819744	-1.21774	-0.897938	-0.282582
ENSMUSG00000039954	Stk32a	C	1.23351	1.39206	1.64101	1.58376	1.30193	1.18278	1.64242	1.42639	1.62175	1.68693	1.54886	1.42803	1.58492	1.75373	1.38621	1.53247	-0.570138	-1.07208	-0.758022	-1.02416	-0.628966	-0.970145	-1.90416	-3.6509	-1.01101	-0.0846306	-0.963145	-1.14754	-1.13829	-0.964016	-1.35579	-0.433723	-0.342176	-0.578717	-0.303744	-0.406672	-0.18787	-0.371751	-0.896099	-0.426044	-0.674442	-0.898527	0.076199	-0.409943	-0.592347	-0.770055	-1.82288
ENSMUSG00000030353	Tead4	C	-0.379529	0.0352142	-0.736661	-0.348933	-1.8679	-0.657223	0.0469699	-2.26347	0.28917	-0.323564	-0.807428	-0.0574178	-0.288488	-0.751219	-0.437401	-0.215942	-0.362114	-0.189535	-0.731857	-0.0677472	0.00925197	-0.328431	-0.744226	0.548458	-1.81656	-0.991536	-1.81043	-0.120275	-0.667051	-0.905501	-1.0709	-0.789591	-0.349753	0.132406	-0.0949066	-0.146985	-0.652613	-0.521356	-0.62855	-0.0736651	-0.154241	-0.357861	-0.610158	-1.0494	0.0890458	-0.409137	-0.900968
ENSMUSG00000060843	Ctnna3	C	-1.12914	-0.0119429	0.0708178	-1.74353	0.141608	1.00328	0.415773	-0.509605	0.619739	-0.271848	-0.0109994	0.50453	-0.44744	0.150277	-0.0454731	0.316255	-0.804542	-0.344675	-1.6244	-0.960295	-1.08782	-0.81149	-2.69839	-1.61195	-0.313439	0.0902537	-1.31507	-1.80362	-0.497741	-1.65839	-1.96345	0.149717	-0.0429653	-0.628825	-0.705322	0.0150712	-0.560884	0.422257	-0.337598	-0.528008	-0.691371	-0.410862	-0.407242	-0.74467	-0.242585	-0.0540397	-0.641537
ENSMUSG00000021221	Dpf3	C	-0.558652	-0.276987	-0.123948	-0.0222973	-0.28857	0.272703	-0.290429	-1.58682	-0.364247	-0.687775	-1.03889	-0.125493	-0.373701	-0.541693	-0.875032	-1.39319	-1.21322	-0.773701	-0.887438	-0.957998	0.0552041	-0.639422	-0.923058	-1.21242	-0.702698	-0.737128	-0.729612	-1.53282	-1.4144	-0.347222	-1.56511	0.77021	0.674246	0.56179	0.738552	0.46888	0.245261	0.139649	0.910531	0.439118	0.241705	0.770385	0.837041	0.275432	0.77293	0.500897	-1.78748
ENSMUSG00000025887	Casp12	C	0.622139	-0.165935	-0.0913715	-2.46462	-1.09875	-0.269893	-0.360187	-0.205201	-0.557362	-0.224822	-0.731383	0.262636	-0.614404	0.508886	-0.400385	-0.417091	-2.04028	-0.695799	-0.648449	-0.544185	-0.5107	0.627987	-0.611433	-2.46462	-1.17038	-0.209743	-2.46462	-1.11222	0.304891	-0.5138	0.57089	-0.142756	-0.431317	-1.29225	-0.90778	-1.01313	-1.51319	-0.247957	-0.0118613	-0.274814	-0.828032	-0.731653	0.60409	-0.553957	-1.14644	-1.1785	-1.37895
ENSMUSG00000025477	Inpp5a	C	-0.354265	-0.561168	-0.566159	-0.147766	-0.414591	-0.234154	-0.511806	-0.569356	-0.513409	-0.475782	-0.363146	-0.624159	-0.42291	-0.560377	-0.312643	-0.445225	-0.791959	-0.514369	-1.19016	-0.790202	-0.83397	-0.632492	-0.408409	-0.96105	-0.688181	-0.655096	-0.53637	-0.607453	-0.636496	-0.839287	-0.89515	0.0745002	-0.89792	-1.11892	-0.944936	-0.972741	-0.933177	-0.801387	-1.0393	-0.982206	-1.05508	-0.938299	-0.742499	-1.141	-0.906113	-0.979424	-0.609174
ENSMUSG00000018581	Dnah11	C	0.632081	0.466793	0.498267	1.09308	0.841199	0.809642	0.998469	0.80945	0.849875	0.878849	-0.0154713	0.511475	0.663783	0.519752	0.351605	-0.00934934	-0.108366	-1.21716	-0.324349	-1.67516	-0.785055	-1.1476	-2.87198	-0.626542	-3.09698	-0.539113	-3.31619	-1.31122	-1.62171	-1.43255	-0.495485	-0.595436	-0.721922	-1.10187	-1.54028	-1.0023	-0.413588	-0.528239	-0.62206	-0.729141	-0.385245	-1.35848	0.201193	-0.52737	-0.596129	-1.52767	-2.26455
ENSMUSG00000057615	Ldoc1	C	0.589565	-0.387568	0.847637	0.922693	-1.46581	-0.167331	0.328389	0.189757	-0.211408	-0.00674168	-0.0460779	-0.0451937	-0.142673	-0.343828	0.200309	-0.111526	-0.0801795	-1.07762	0.671144	-0.566842	0.120485	-0.770299	-3.2829	0.193261	-1.78946	-0.497304	-0.349211	-0.631807	-0.138414	-0.0201918	0.180157	-0.671532	-0.726021	-0.81987	0.40043	-0.34316	-0.13823	-0.476901	-0.263776	-0.204163	-0.139746	-0.492981	-0.586221	0.00389654	-0.601683	0.0612855	-1.9204
ENSMUSG00000032908	Sgpp2	C	0.269818	0.355574	0.108245	0.760606	0.398736	0.462939	0.187959	0.258403	0.331838	0.318081	0.268067	0.608003	0.0327433	0.384792	0.645072	0.594632	-1.93814	-1.28435	-2.03368	-1.57398	-1.83407	-1.33266	-1.1203	-1.82085	-0.953959	-0.953358	-1.90578	-1.12763	-1.39892	-1.54133	-1.00931	-0.17572	-0.674325	-0.99629	-0.868122	-0.938898	-0.97259	-1.7048	-1.25506	-1.21464	-0.909766	-1.30074	-0.581835	-1.07556	-0.998262	-1.58825	0.100378
ENSMUSG00000032502	Stac	C	0.259809	0.330326	0.54295	0.689319	0.151768	-0.459935	0.214165	0.258873	-0.375409	0.137185	0.0578074	0.132423	0.0950407	0.0706795	0.257905	0.18737	-0.455232	-1.28809	-1.87857	-0.943974	-1.5115	-0.931806	-0.183638	-1.23652	-0.406685	-0.568182	-0.894482	-0.986354	-1.79727	-1.39031	-0.577574	0.381827	0.0415557	-0.461693	-0.56809	0.161351	0.376025	-0.11103	0.289515	-0.0438152	0.253436	0.0293507	0.122771	0.101622	0.174895	-0.0124574	-2.91329
ENSMUSG00000047496	Rnf152	C	0.376848	0.166412	0.381826	0.980944	0.093766	0.346031	0.417149	0.213185	0.689404	0.579639	0.666847	0.795563	0.737584	0.824562	0.806146	0.762226	-0.357828	-0.189895	-0.416119	-0.294902	-0.3366	-0.745523	-0.200712	0.0356979	-0.272114	-0.427382	-0.309999	-0.759609	-0.545569	-0.772303	-0.983821	-0.41786	-1.9852	-2.07674	-2.15067	-1.4795	-1.35156	-1.57872	-1.99632	-1.94602	-1.79453	-2.20247	-1.06625	-1.44922	-2.05488	-2.16874	-0.26109
ENSMUSG00000020592	Sdc1	C	1.21134	-0.122251	-0.46497	-1.30434	-0.662107	-0.231317	0.00792958	-0.119738	0.075014	-0.0571282	-0.294899	-1.1281	0.128795	-0.223342	-0.448229	-0.344257	-2.71683	-0.511551	-0.900656	-0.000770514	-0.0321991	-0.372298	-0.262814	0.304151	-0.892333	-2.15942	-1.20859	-0.138914	0.725002	-0.866667	-0.436823	-0.0539303	-0.933511	-0.906331	-0.899321	-1.97934	-0.312081	-0.974712	-0.856012	-0.428086	-1.57584	-1.5356	-0.449498	-0.632836	-1.02072	-1.21547	-1.12216
ENSMUSG00000043461	Sptssb	C	-0.738255	-0.534556	-0.287257	-0.548447	-0.172012	-0.695746	-0.192435	-0.394628	0.138649	0.166772	0.876133	0.728022	0.542327	0.434894	0.893897	-0.041108	-3.72362	-0.756088	-1.05503	-0.324469	-0.96905	-2.36251	-0.15983	-0.178174	-0.615013	-0.988226	-1.88267	-1.14571	-0.85084	-1.59038	-0.517628	-0.207117	-0.273203	-0.196044	-2.37105	-0.78388	-1.4244	-1.77262	-1.07648	-1.34229	-1.42576	-0.978463	-0.57517	-1.12915	-1.12893	-1.27817	0.620118
ENSMUSG00000027376	Prom2	C	1.69066	-0.31427	-0.36953	0.0230785	0.58782	0.142646	-0.0324239	-0.0213895	-0.435607	0.316835	0.155249	-0.136812	-1.35949	0.102363	-0.172832	-0.422284	-0.733236	-0.574043	-0.81125	-1.49822	-0.168784	-1.38584	-2.34286	-1.27595	-1.55523	-0.0879871	-1.26783	-1.39276	-1.33426	-1.13954	-0.730768	-0.0865884	-0.368115	-1.75643	-1.51355	-0.415899	-0.732007	-0.126202	-0.835709	-1.6224	-0.706276	-0.0167973	0.124283	-0.738857	-0.732367	-1.73579	0.0535634
ENSMUSG00000042529	Kcnj12	C	-0.421054	-0.180019	-0.2574	-1.27151	0.0914571	0.129976	-0.492445	-0.453921	-0.270965	-0.197209	-0.310041	-0.451844	-0.463389	-0.200111	0.134515	-0.226594	-0.491576	-0.47212	-0.557697	-0.0948465	-0.916408	-0.879571	-0.185795	-0.823297	-0.293325	-0.333208	-0.515735	-0.381648	-0.409696	-0.87623	-0.458892	-0.530661	-1.66461	-1.70665	-1.22443	-1.34693	-1.43798	-1.23419	-1.35463	-1.5185	-1.26276	-1.69616	-1.57726	-1.77463	-1.54857	-1.56466	-0.0879507
ENSMUSG00000028370	Pappa	C	-0.131952	-0.170122	0.21638	1.67663	0.447553	0.59408	0.643577	0.330987	0.681726	0.715685	0.616276	0.68806	0.748769	0.81484	0.279262	0.432386	-1.12017	-0.597683	-0.896622	-2.19135	-1.11339	-0.582845	-1.1112	-0.698116	-1.74072	-0.935791	-0.436364	-0.287405	-0.462608	-1.19543	-0.775746	-1.06278	-1.17755	-0.806582	-1.59689	-0.756737	-0.248437	-0.341997	-0.593711	-0.601552	-0.422062	-1.01444	-0.53809	-0.488056	-0.725111	-0.297335	-2.47954
ENSMUSG00000015653	Steap2	C	0.231283	0.0725623	-0.0118553	0.216457	0.0187877	0.12108	0.15399	0.485445	0.411834	0.321228	0.241758	0.371291	0.428479	0.489554	0.486632	0.440321	-1.53578	-1.06844	-0.817607	-1.13474	-0.735766	-0.795016	-0.630266	-0.12957	-0.663553	-0.686885	-0.599067	-0.96035	-0.802334	-1.16645	-1.02207	-0.197961	-0.868185	-0.987771	-1.67084	-0.730691	0.148037	-0.959626	-1.45276	-1.35487	-1.5469	-1.59175	0.415715	-0.85212	-1.5431	-1.96586	-0.765132
ENSMUSG00000025407	Gli1	C	1.56294	1.71296	0.565694	0.448842	0.821106	1.09348	0.894691	1.33905	1.01196	1.19767	1.12908	0.914299	1.29087	0.800622	1.26522	1.31029	-0.105851	-0.873795	-0.0287603	-0.189605	0.125183	-0.204514	-1.56207	-0.516474	0.367908	0.166742	-0.833097	-0.480332	0.130787	0.222005	0.420859	-0.716069	-1.51366	-2.05839	-2.15622	-1.74132	-1.65569	-0.767457	-1.39135	-0.837842	-1.13939	-1.22806	-1.41013	-0.940494	-1.72272	-0.837806	-1.67329
ENSMUSG00000090799	Klhl33	C	0.608801	0.379626	0.283815	-1.06027	0.0852036	0.311996	0.126351	0.717785	0.213752	0.386363	0.0919325	0.239934	0.395433	0.17554	0.310145	0.572982	-0.826283	-1.82251	-1.37436	-1.56153	-0.61233	-1.21769	-1.72412	-1.11663	-1.19432	-2.61477	-1.29573	-1.18012	-0.920583	-1.99263	-2.16088	0.331771	-0.656654	-0.381016	-0.792473	-0.25126	-0.941338	-0.606669	-0.679325	-1.0307	-1.07871	-0.588739	-0.543593	-0.730232	-0.270273	-0.573972	-0.698775
ENSMUSG00000022096	Hr	C	0.487313	0.487091	0.671489	0.620264	1.58698	0.824308	1.13154	0.881093	1.09534	0.901904	1.21863	0.0288992	0.814418	0.660753	0.104003	0.668613	-1.28818	-1.28167	-2.05992	-1.39443	-1.31002	-1.84788	-1.28474	-1.70246	-0.744711	-1.09397	-1.22499	-1.09443	-1.40968	-1.4411	-1.53222	-0.42521	-1.52543	-1.68622	-1.88244	-1.4545	-1.42004	-1.61029	-1.18071	-1.66006	-1.75574	-1.6179	-1.2374	-1.74864	-1.54177	-1.48563	0.348751
ENSMUSG00000039103	Nexn	C	-0.435841	-0.817371	-0.342839	-0.254187	-1.09873	-0.0910655	-0.894103	-0.181408	-0.367251	-0.342822	0.0844238	-0.227143	-0.40704	-0.586896	0.982085	-0.529243	-0.714231	-0.264149	-0.95389	-0.513191	-0.534934	-0.630297	-1.44868	-0.638806	0.623612	0.369103	-1.24864	-1.28047	0.0513188	-1.34087	-0.689765	-0.220689	-0.716459	-1.24651	-1.28738	-1.23724	-1.30115	-1.39158	-1.43194	-1.78203	-1.26294	-0.886289	0.590292	-1.71439	-1.41026	-0.963023	0.314733
ENSMUSG00000004347	Pde1c	C	-0.0754471	-0.479469	0.359098	-0.176531	-0.108178	-0.268744	-0.0871556	-0.485267	-0.144701	-0.0038253	0.0253724	0.160727	0.0983169	-0.00969922	-0.0597782	0.226035	-0.0555507	-0.485947	-0.942087	-1.02617	-0.133921	-0.629077	-0.510284	-1.39975	-0.475278	0.164297	-1.13243	-0.995238	-1.00389	-0.926625	-0.538838	0.134933	-0.625159	-0.736736	-0.915481	-0.798237	-1.02393	-0.602404	-0.912246	-0.925675	-0.794323	-1.36941	-0.518242	-0.879415	-0.869973	-1.09499	-1.36523
ENSMUSG00000039662	Icmt	C	-0.725792	-0.646924	-0.643507	-0.597714	-0.652414	-0.641775	-0.659765	-0.725347	-0.758161	-0.712299	-0.708068	-0.799935	-0.827578	-0.74318	-0.663256	-0.858882	-0.377849	-0.566262	-0.584841	-0.51136	-0.56168	-0.635056	-0.444747	-0.667865	-0.483359	-0.577895	-0.570684	-0.430673	-0.422903	-0.590342	-0.554621	0.20249	-0.64816	-0.821325	-0.617827	-0.702771	-0.548621	-0.720489	-0.57478	-0.705588	-0.670701	-0.673209	-0.585062	-0.849034	-0.605487	-0.646938	-0.501694
ENSMUSG00000026875	Traf1	C	1.2906	1.04049	1.33833	1.39844	1.16528	1.33082	1.44991	0.911773	1.27047	1.47029	0.441545	1.18537	0.654775	1.33667	0.367032	0.415129	0.0589627	-0.803684	-0.414022	0.477207	-0.522312	0.89555	-0.395161	1.00941	-0.738649	-0.133621	-1.50264	-1.67697	0.316055	-1.71864	0.782034	-1.38429	-1.19986	-0.947712	-1.37527	-0.429164	-0.704539	-1.04823	-1.28751	-0.875262	-1.13697	-1.61062	-0.876441	-0.417672	-1.21913	-2.22116	-1.74892
ENSMUSG00000027583	Zbtb46	C	-0.246848	-0.69524	-0.442607	0.147254	-0.475692	-0.461816	-0.487063	-0.542345	-0.547318	-0.636018	-0.404388	-0.33377	-0.563426	-0.414857	-0.500127	-0.80337	-0.226154	-0.633526	-0.199488	-0.546533	-0.7357	0.585455	-1.17664	-0.366516	-0.0938243	-0.286955	-0.472372	-0.234512	-0.405477	-0.023121	-0.88842	-0.0254569	-1.16786	-1.02356	-0.678463	-1.10525	-0.732287	-0.929964	-0.589447	-1.26813	-1.4299	-0.875424	-0.843827	-0.676884	-1.04408	-0.955615	-0.73006
ENSMUSG00000020902	Ntn1	C	0.538797	0.604288	0.226176	0.0734089	0.795655	0.296424	0.503286	0.623854	0.547619	0.44329	0.37817	0.326158	0.424777	0.612898	0.532945	0.217024	-0.607181	-0.607338	-0.558863	-0.362749	-0.501842	-0.300284	-0.572384	-0.156352	0.0996031	0.0157498	-1.11459	-0.282487	-0.206501	-0.53312	-0.573065	-0.462129	-0.789747	-1.38707	-1.16981	-1.16403	-1.32568	-1.22731	-1.35593	-1.22275	-1.07418	-1.10669	-0.892148	-1.14556	-1.09764	-1.20082	-1.4629
ENSMUSG00000028150	Rorc	C	-0.194933	0.150675	-0.0809723	-0.0550778	0.411325	-0.257583	0.528948	0.576932	0.456795	0.456169	0.119672	0.408161	0.318131	0.273032	0.111385	0.035339	0.162765	-0.48945	-0.0740449	-0.333327	-0.665746	-0.028811	-0.676671	-0.948406	-0.712975	-0.0260073	-1.5701	-0.742445	-0.893381	-1.09731	-0.665376	0.0536658	-0.0830618	-0.605193	-1.06188	-0.616059	-0.877407	-1.62103	-0.602632	-0.60788	-0.391258	-0.536485	-0.399946	0.107312	-1.43134	-0.549207	-1.20166
ENSMUSG00000022949	Clic6	C	1.19817	1.16707	1.37743	0.748852	1.2213	1.18783	1.71732	1.34933	1.1603	1.04575	1.19439	1.04082	1.07041	1.15403	0.88656	1.18192	-2.23724	-0.093721	-0.908544	-0.343691	-0.0515084	0.172027	-0.408118	0.347101	-0.0311746	1.12622	-0.61421	0.306952	-0.711163	-1.08556	0.0637411	-0.419226	-0.288624	-0.343375	-0.752082	1.07598	2.80449	-0.381832	-0.743239	-1.27016	0.190996	-0.33876	2.75928	1.3894	0.0318825	-0.208265	-1.73312
ENSMUSG00000062542	Syt9	C	1.0656	0.875494	1.08638	0.670295	1.22013	1.10664	1.00571	0.882277	1.04971	1.08884	1.08865	1.10334	1.09463	0.995698	1.33288	1.04729	0.232162	-0.350826	0.272035	-0.0800146	-0.152691	-0.162872	-0.213606	-0.318134	0.0802778	0.150794	0.146199	-0.275038	-0.368784	-0.254478	-0.322701	-1.18903	-1.7763	-1.81675	-1.7533	-1.67426	-1.17224	-1.25055	-2.23817	-1.75253	-1.83761	-2.4542	-0.554187	-1.34465	-2.14109	-1.64319	-1.80557
ENSMUSG00000001281	Itgb7	C	-0.941636	-0.126302	-0.042408	0.503357	-0.898722	-0.556581	-0.270064	-2.30497	-0.757024	0.232653	-0.324193	0.146751	-0.384333	-0.892075	-1.6136	-0.532976	-0.970877	-1.19913	-0.764334	-0.66007	-1.86793	-0.645466	0.221173	-0.228294	-1.28627	-0.557068	-0.14033	-0.77919	-0.868169	0.11356	-0.155305	0.271868	-0.730515	-0.577207	-1.34205	-0.65354	-0.969647	0.113763	-0.82822	-0.291763	-0.373882	-1.39928	-0.927192	-0.341793	-0.519178	-1.29438	-0.785903
ENSMUSG00000041660	Bbox1	C	0.178184	1.1578	1.47645	1.91377	1.5491	1.58564	1.6223	1.36964	1.67247	1.71924	1.4703	1.35925	1.52667	1.77196	1.45382	1.41986	-0.310953	-1.0779	-0.279128	-1.32938	0.0393188	0.0944899	-1.92126	-0.116177	-1.20285	-0.290775	-0.285918	0.203935	-0.570401	-1.08677	-0.839442	-0.345068	-0.511532	0.368146	-0.0321251	-0.373688	-0.550805	-0.948341	-0.276273	-0.580817	-0.516052	-0.436865	-0.00142052	-0.655953	-0.392984	-0.151684	-1.47536
ENSMUSG00000032313	Tmem266	C	-0.878181	-0.677073	-0.796291	-1.7191	-0.613733	-0.994611	-0.434843	-0.457432	-0.464081	-0.455247	-0.517631	-0.825937	-0.920956	-0.493625	-0.740077	-0.427437	-0.330321	-0.774741	-0.191488	-0.373743	-0.218328	-0.111021	0.0391596	-0.521274	-0.489923	-0.831481	-0.731363	-0.747485	-0.584114	-0.245284	-0.111102	0.113895	-1.36693	-1.22463	-0.982699	-1.07384	-0.866572	-1.1425	-0.992102	-1.0239	-1.10791	-0.763493	-1.26579	-0.892977	-0.910068	-1.21056	-0.316943
ENSMUSG00000041741	Pde3a	C	1.20219	0.0273274	0.125072	-0.387903	0.780938	0.436005	0.93097	-1.00907	0.43027	0.0107974	0.230862	-0.173944	0.525918	0.0525253	0.0873677	0.40252	-1.0406	-0.469387	0.187277	0.2343	0.205158	-0.119309	-0.104377	-1.24709	0.14286	0.107357	0.581712	0.346013	0.0671765	0.130409	-0.318998	-0.204103	-0.429178	0.00714677	-0.071005	-0.148648	-0.509726	-1.43866	-1.17307	-0.547885	-0.892174	-0.671699	-1.54254	-0.722635	-0.590593	-0.53541	-2.28492
ENSMUSG00000018593	Sparc	C	1.70336	1.78907	2.00408	1.5238	2.17986	1.73015	2.07363	1.7809	1.77514	2.03059	1.90261	1.7165	1.73114	1.78772	1.54511	1.74493	-0.528239	-0.617167	-0.181658	-0.184692	-0.273887	-0.0280481	-0.247369	-0.662849	-0.339888	0.342889	-0.797342	-0.145034	-0.533956	-0.497702	-0.135189	-0.60318	-1.02412	-0.953734	-0.822844	-1.13024	-0.649432	-0.819501	-0.995024	-0.851629	-0.845786	-1.01891	-0.784168	-0.900272	-0.788774	-0.854853	-1.85788
ENSMUSG00000033207	Mamdc2	C	1.56073	1.09434	1.44251	1.52635	0.879945	1.47662	1.15432	1.24254	1.43882	1.32149	1.31076	0.876024	1.32108	1.2642	0.958803	1.24825	-0.530422	-2.05539	-1.1791	-1.37213	-0.49067	-2.73408	-1.91752	-0.23323	-1.22538	-2.87936	-2.36173	-1.19551	-0.377287	-1.39185	-2.24419	0.33575	-0.879886	0.0590941	-0.625197	-1.11379	-0.261946	-1.14141	-0.326873	-0.598154	0.302484	-1.7038	0.144122	-0.185888	-0.842076	-1.38748	-0.117883
ENSMUSG00000029084	Cd38	C	1.03318	1.04427	1.34783	1.25887	0.957161	1.23711	1.63614	1.74231	1.75894	1.42789	1.68146	1.58742	1.84795	1.7204	1.62387	1.70928	-4.3608	-1.01034	-1.06385	-1.36851	-0.89409	-1.0031	-1.35214	-0.164695	-1.641	-0.615144	-2.84428	-0.911687	-1.80905	-0.830505	-0.494727	0.3961	0.564716	0.464183	0.560802	0.34259	-0.00988529	0.460773	0.085555	0.624091	0.6065	0.404335	0.677212	0.463546	0.429897	0.306765	-1.76774
ENSMUSG00000071379	Hpcal1	C	0.41435	0.468713	0.573678	0.216483	0.383012	0.420254	0.377404	0.249874	0.242468	0.333239	0.407624	0.26477	0.226458	0.22643	0.0799821	0.324547	0.673986	0.221442	0.794406	0.793662	0.663333	0.710855	0.398596	0.31947	0.41222	0.685158	0.918813	0.560259	0.507682	0.81802	0.709204	-0.70473	-1.30276	-1.20993	-0.984224	-1.31812	-1.14758	-0.892322	-1.37589	-1.19213	-1.41914	-1.2681	-1.69682	-1.3719	-1.38351	-1.44507	-1.40264
ENSMUSG00000028906	Epb41	C	-0.160787	-0.33464	-0.165373	-0.335077	-0.107397	-0.335244	-0.279708	-0.444151	-0.228543	-0.24905	-0.398131	-0.213191	-0.21201	-0.281405	-0.172777	-0.241149	-1.0304	-0.554689	-0.961523	-0.749715	-0.602119	-0.582394	-0.366496	-0.447981	-0.697579	-0.69361	-1.30421	-0.785629	-0.719526	-1.2327	-0.647232	-0.104269	-0.960496	-0.930943	-0.993674	-0.891985	-0.745751	-1.08301	-1.04523	-1.25915	-0.824647	-0.927589	-0.962676	-1.01007	-1.08688	-0.924983	-0.308233
ENSMUSG00000025784	Clec3b	C	-0.163474	0.142455	0.195589	-0.982573	0.399086	0.727613	0.653567	1.40944	0.194585	0.151025	-0.293165	-0.351742	-0.176014	0.654438	-0.0731464	-0.0176008	-1.22357	-1.37772	-1.24903	1.10185	-0.856656	0.920891	-2.22177	0.762497	0.369187	0.152695	-1.05533	-0.785572	0.606573	-0.437221	-1.29882	-0.346155	-1.07227	-1.05585	-1.9493	-0.66347	-0.600846	-1.47669	-0.176587	-0.95396	-0.824537	-1.08429	-0.890499	-0.561566	-0.628623	-1.13403	-1.86708
ENSMUSG00000025504	Eps8l2	C	-0.0377913	-0.629745	-0.977968	-0.766553	-0.669382	-0.18346	-0.453423	-0.302938	-1.23043	-1.01132	-1.04657	-0.514892	-1.18314	-1.16094	-0.408863	-0.45535	-0.73332	-0.234766	-0.565952	-0.691453	-0.0420147	-0.158233	-1.08535	-0.327627	0.552644	-0.588334	-1.80378	-0.690134	-0.914176	-1.12827	-0.451129	0.382551	-0.559932	-0.710971	-0.145854	-0.0394685	0.429399	-0.491036	-0.257183	-0.717644	-0.27195	-0.414425	0.355793	-0.507967	-0.24759	-0.418071	-0.83855
ENSMUSG00000003644	Rps6ka1	C	-0.0490223	-0.169261	0.0324807	-0.207589	-0.362778	-0.322537	-0.145863	-0.230054	-0.282679	-0.299368	-0.301623	-0.370079	-0.482241	-0.472512	-0.326239	-0.136504	-0.722526	-0.890559	-0.507328	-0.486455	-0.292627	-0.46613	-0.674349	-1.24906	-0.44674	-0.651993	-1.15038	-0.544098	-0.731818	-0.470348	-0.587834	-0.122957	-0.569818	-1.11638	-0.950322	-0.838354	-0.631164	-1.02327	-0.887106	-0.87633	-0.477718	-0.86257	-0.704808	-0.887217	-0.739849	-0.720047	-0.911935
ENSMUSG00000024769	Cdc42bpg	C	-0.143163	-0.486919	-0.499655	-0.291399	-0.0498833	-0.247456	-0.0872644	-0.295077	-0.343658	-0.410793	-0.305758	-0.782215	-0.333362	-0.448094	-0.485289	-0.619238	-0.00708385	-0.442118	-0.319551	-0.207715	-0.26756	-0.252008	-0.784952	-0.502186	-0.397573	-0.117189	-1.2693	-0.768483	-0.412449	-1.1086	-0.525688	0.197748	-0.329279	-0.593086	-0.436596	-0.476886	-0.000604317	-0.648397	-0.851108	-0.422741	-0.157557	-0.603462	-0.0531981	-0.106041	-0.567485	-0.497414	-0.741028
ENSMUSG00000040812	Agbl2	C	-0.973697	0.00748985	-0.519499	-1.26051	-0.792748	-0.627762	-0.202288	-0.768318	0.0712107	-0.477889	-0.520644	-0.825423	-0.3222	0.242618	0.176301	-0.132772	-0.430139	-0.826255	-0.26162	-1.8825	-0.851304	-1.1179	-2.65791	0.984098	-2.6748	-0.449097	-0.675252	-1.04305	-0.863156	-1.41751	-0.0334068	-0.0625688	-0.718613	0.00100169	-0.912703	-0.402379	-0.0164148	-0.552732	-0.352535	-0.91205	0.104122	-0.672508	0.517641	-0.106369	-0.0672122	-0.62504	-0.787211
ENSMUSG00000022610	Mapk12	C	-0.371482	-0.0754626	-0.265923	-0.213006	-0.666151	-0.114441	-0.251603	-0.00250945	-0.183787	-0.30788	-0.24942	-0.498867	-0.23566	-0.422447	-1.09053	-0.30427	-0.695157	-0.474937	-1.4391	-0.259005	-0.649287	0.0967737	-1.46404	-0.00635663	-0.407084	-0.750359	-1.15498	-0.687147	-1.01174	-0.511475	-0.130714	0.181546	-1.08979	-1.02371	-1.50586	-1.37127	-1.5332	-1.24452	-1.50069	-1.09711	-1.3552	-1.12627	-0.963115	-1.01714	-1.33317	-1.47632	-0.270868
ENSMUSG00000020334	Slc22a4	C	0.519236	0.391995	-0.149063	0.457034	0.321957	0.358047	0.332979	0.322869	0.447648	0.441924	0.382794	0.336365	0.38034	0.351442	0.314591	0.346987	-0.679363	-1.40585	0.0328804	-1.07652	-0.877487	-0.206303	-0.944809	-0.215147	-0.89333	-0.684877	-1.44133	-1.07603	-0.867146	-0.220728	-0.752098	0.0853897	-1.10716	-0.915708	-0.946306	-1.27778	-0.934682	-0.440483	-0.776437	-1.17957	-0.943448	-1.02595	-0.88028	-0.360411	-0.926001	-0.887713	-0.844714
ENSMUSG00000041000	Trim62	C	-0.21159	-0.106527	-0.282226	-0.129631	-0.0760243	-0.173246	-0.439358	-0.564247	-0.292741	-0.137265	-0.358659	-0.296024	-0.480944	-0.300173	-0.525652	-0.275277	-0.0376122	-0.449244	-0.019989	-0.284574	-0.516662	-0.3224	-0.240672	-0.626785	-0.208206	0.0108732	-0.279827	-0.262951	-0.420309	-0.0253346	-0.371837	-0.284837	-1.01652	-1.10258	-1.06815	-1.28324	-0.796079	-1.29308	-1.15586	-1.08337	-1.07029	-1.23809	-1.74124	-0.909778	-1.13811	-1.18696	-1.14771
ENSMUSG00000029370	Rassf6	C	-2.14891	-0.373949	-0.283237	0.110664	-0.870088	-0.0551108	0.00082602	-0.422075	0.0971008	-0.397464	0.425766	0.895307	0.376184	0.310634	0.539024	-0.947791	-2.40254	0.0342081	-0.586372	0.223389	-0.228463	-0.726116	-0.159844	-2.40254	-0.308961	-0.465311	-0.173193	0.0168363	-1.22306	-0.0327585	-0.465834	-0.0806801	-0.840004	-0.814649	-1.57323	-0.753953	-1.19634	-0.185881	-0.541728	-0.0212172	-0.397762	-1.0928	-0.986373	-0.446558	-1.08437	-1.79547	-0.203559
ENSMUSG00000042817	Flt3	C	-0.746563	-0.332243	-0.346625	-0.315873	-0.19689	-0.715087	-0.607708	-0.259207	-0.228786	-0.328639	-0.535819	-0.133546	-0.376023	-0.10182	-0.00043331	-0.102062	-0.685115	-0.884911	-1.21823	-2.02488	-2.26513	-2.07352	-1.45565	-1.34656	-0.704711	-1.26655	-1.00136	-1.35308	-0.432736	-1.37265	-1.2003	0.173153	-0.415122	0.146728	-0.269524	-0.178233	-0.465301	-0.189405	-0.193321	-0.106293	-0.459795	-0.186751	-0.536702	-0.78384	-0.325035	-0.443772	-0.279116
ENSMUSG00000031543	Ank1	C	-0.26334	-0.269613	-0.224691	-0.0510791	-0.0120617	-0.115095	-0.277253	0.107042	-0.112326	-0.0404544	-0.263984	-0.312515	-0.324901	-0.321798	-0.417322	-0.30069	-0.578378	-0.756478	-0.674172	-0.710626	-0.79603	-0.941509	-0.664861	-0.752021	-0.516265	-0.924746	-0.880665	-0.649336	-0.950564	-0.904812	-0.962328	-0.113915	-0.959612	-1.13855	-1.18491	-1.0033	-0.861269	-0.993631	-1.08594	-0.811701	-0.790818	-1.10717	-0.975007	-1.0962	-1.01814	-1.09288	-0.34504
ENSMUSG00000062151	Unc13c	C	0.154985	0.0345853	0.291343	0.164644	0.181559	0.283522	0.355235	0.620023	0.620443	0.514355	0.553965	0.656327	0.611582	0.558227	0.587611	0.644219	0.913567	0.915962	1.13353	0.681194	1.50841	1.06547	1.31062	0.868816	0.883094	1.22557	0.721277	1.01728	0.671428	0.622459	0.602841	-0.581648	-1.45303	-1.1925	-1.18944	-1.01685	-1.47806	-0.79502	-1.00019	-0.755885	-1.03522	-1.52543	-0.542506	-1.15746	-1.92111	-1.4665	-1.18241
ENSMUSG00000021342	Prl	D	-0.773201	5.28047	-0.762735	-2.65714	3.34494	0.0702597	5.99504	-2.65714	-0.922604	-1.28102	0.338195	-2.65714	-2.65714	1.39261	6.30023	1.98828	-2.65714	-1.80708	3.92111	1.83389	-0.963139	2.61532	-0.414443	6.46854	-2.21023	-0.475363	-2.65714	-1.49191	-2.65714	2.77607	-0.302714	3.46057	2.97746	-1.65494	-1.41868	-0.632307	-0.0620078	5.13202	-2.32004	-0.688232	-1.72812	-1.94887	-1.87878	-2.65714	-1.2348	-1.02829	2.30074
ENSMUSG00000020713	Gh	D	0.257248	4.95373	-1.69993	-1.69993	2.1006	-1.10429	5.44902	-1.42439	-0.815179	-1.46445	0.154192	-1.21289	-1.69993	-0.011502	5.82839	2.05879	-1.69993	-1.69993	3.70227	0.495791	-1.69993	2.30553	-0.615972	5.94792	-1.69993	-1.69993	-1.69993	-1.69993	-1.69993	2.02749	0.330558	1.87154	2.34158	-1.69993	-1.22649	-0.962441	0.424938	3.98806	-1.69993	-1.69993	-1.31995	-1.69993	-1.69993	-1.69993	-1.05833	-1.22238	0.92367
ENSMUSG00000005268	Prlr	D	2.67747	2.52291	3.00017	2.75842	2.43804	2.77271	2.76111	2.81197	2.88337	2.74969	2.89645	3.2004	3.12456	3.12817	2.92978	3.039	-0.456233	0.124904	0.769237	-0.075755	0.987034	1.77972	0.525913	0.318834	0.738055	1.26309	0.54629	0.657061	0.0988928	0.341395	0.991397	-0.763525	0.083245	-0.133988	-0.089335	1.7981	3.51703	-0.0284854	-0.495835	-0.209463	-0.156111	-0.43859	3.35839	2.1278	-0.184508	-0.443204	-1.62035
ENSMUSG00000028172	Tacr3	D	3.16188	3.13835	2.72114	3.52464	2.54308	2.53742	2.87137	3.10653	3.33097	2.92955	3.40319	3.29359	3.14845	3.16674	3.11105	3.39114	0.400485	0.984447	0.482179	0.382135	1.16725	1.22134	1.24858	-0.595048	1.61278	1.48294	0.697395	1.06269	0.481584	0.274382	0.749749	-0.119629	0.211523	0.625697	1.53518	0.355276	0.995962	0.885188	-0.0411617	0.384464	-0.0257484	-0.241779	0.0540055	0.139263	-0.268662	-1.08612	-0.445794
ENSMUSG00000051136	Ghsr	D	3.23781	3.00249	3.79714	3.14332	3.51473	3.86351	3.22136	3.58225	3.68736	3.51239	3.58974	3.2071	3.75937	3.59524	3.34907	3.47623	0.872169	-0.510454	-0.282349	-1.61525	-0.911102	-0.571154	0.355493	-0.854432	-1.65161	-2.09852	-1.30122	0.402303	-1.28379	0.271265	1.10747	0.286078	1.30827	1.03466	1.09632	0.9146	0.35623	0.118142	1.17738	0.803971	-0.328484	0.287089	-0.68235	0.345009	0.404118	1.30036	-1.35572
ENSMUSG00000054360	Bsx	D	4.01662	4.07827	3.88712	4.30007	4.30473	4.20319	4.17454	4.03334	3.75286	4.01242	3.58199	3.61235	3.487	3.68388	3.93697	3.45271	-1.27084	-1.27084	-1.27084	-1.27084	-1.27084	-1.27084	-1.27084	-1.27084	-1.27084	-1.27084	-0.817802	-1.27084	-1.27084	-1.27084	-1.27084	-1.27084	-0.864174	-1.27084	-1.27084	-0.653716	-1.27084	-0.240625	-0.933745	-1.27084	-1.27084	-1.27084	-0.70838	-1.27084	-1.27084	-0.663767	-0.528046
ENSMUSG00000038257	Glra3	D	2.87529	2.59098	2.69084	2.60725	2.34788	2.32771	2.60336	2.80758	2.65364	2.62461	2.37737	2.97665	3.0309	2.77527	2.82932	2.91381	1.41811	2.01373	2.1259	2.54275	1.7332	0.775387	2.22923	1.21098	1.68386	2.05896	2.53519	1.80879	1.96659	1.42231	2.0246	-1.60577	-0.915238	-1.29916	-1.04562	-0.695857	-0.794853	-0.337513	-0.937229	-1.10125	-2.46097	-1.06392	-1.85038	-0.946459	-1.147	-1.01554	-0.616774
ENSMUSG00000087075	Lbhd2	D	3.31622	2.83825	2.87608	2.9738	3.06854	2.83447	2.68414	2.02334	2.0402	2.3913	2.27952	2.45481	2.78712	2.31531	2.49971	2.45818	-0.885779	0.583402	1.21562	0.70749	0.971222	1.56836	1.51857	-0.841092	1.6122	1.4289	0.216003	0.539997	0.940568	0.956803	1.41834	-1.67609	-2.04646	-2.22044	-0.300224	-0.115254	-1.60701	-0.278465	-2.41952	-1.18535	-1.54015	-2.14596	-0.692623	-1.74285	-2.225	-1.66819	-1.79896
ENSMUSG00000019768	Esr1	D	2.13166	2.55941	2.40633	2.56413	2.53396	2.51303	2.68845	2.77528	2.63835	2.62904	2.55538	2.63769	2.68048	2.95138	2.39312	2.85507	1.71664	1.60532	2.03012	2.0888	1.39262	2.09602	1.8066	1.35884	0.556635	1.97424	1.659	2.08197	1.47909	1.93826	1.68368	-0.818238	-0.163276	0.0286685	-0.0304651	-0.424073	0.367119	0.156985	-1.05024	-0.425058	-0.825233	-0.881288	-1.80789	0.387189	-0.773552	0.0179521	-0.437886
319970	NA	D	3.83288	3.43502	3.79789	3.37541	3.23509	3.2024	3.38945	4.38148	4.02058	3.93166	3.52996	3.62655	4.13924	4.00648	3.59849	3.61626	-1.3516	-0.864845	-1.3516	-0.86833	-0.951762	-1.3516	-0.0336464	-1.3516	1.06994	2.09518	-0.898561	0.686384	-0.7609	-1.3516	-1.02148	-1.06211	-0.628049	-1.3516	-1.3516	-1.3516	-1.3516	-1.3516	-1.0145	-0.631135	-1.3516	-1.3516	-1.04313	-0.908021	-1.3516	-1.3516	-0.816599
ENSMUSG00000027643	Ghrh	D	2.63342	3.97129	3.92331	3.96566	3.72815	3.39509	4.03934	3.85619	3.59736	3.87288	3.94419	3.57949	3.87238	3.32455	3.40917	4.08208	-1.41693	-1.41693	-1.02167	0.5035	0.855787	0.110431	-1.41693	-1.41693	-0.122697	-1.41693	0.267227	-0.466827	-1.09156	-0.0589659	-0.0705634	-1.12744	-1.19932	-1.41693	-1.41693	-1.23621	-1.41693	-1.41693	-1.41693	-1.01219	-0.73647	-0.90844	-0.638572	-1.41693	-1.16999	-1.41693	-1.12477
ENSMUSG00000027360	Hdc	D	3.27692	3.6824	3.51541	3.55969	3.49574	3.53644	3.84532	3.39392	3.31216	3.62523	3.61018	2.95309	3.36977	3.36289	3.0393	3.42495	-0.923859	-0.569534	-0.895594	-0.957766	-1.05142	-1.77101	-0.959597	-0.873286	-1.21372	-0.160998	-1.69322	0.0484606	-0.591324	-0.509414	-1.13434	-1.26502	-1.60929	-1.33342	-1.4111	-0.935276	-1.43328	-1.43201	-1.20112	-2.22661	-0.831021	-1.13723	-0.569845	-1.22514	-1.20079	-1.03495	-1.87511
ENSMUSG00000040148	Hmx3	D	4.09816	4.002	4.19268	3.57025	4.18122	4.15752	3.9672	3.89528	3.52565	3.55621	3.29215	3.30668	3.60503	3.87412	3.33231	3.52065	-1.06326	-1.06326	-1.06326	-1.06326	-1.06326	-1.06326	-1.06326	0.480814	-1.06326	-1.06326	-1.06326	-1.06326	-1.06326	-1.06326	-1.06326	-0.773765	-1.06326	-1.06326	-1.06326	-1.06326	-1.06326	0.140205	-1.06326	-1.06326	-1.06326	-1.06326	-1.06326	-0.0924505	-1.06326	-1.06326	-1.06326
ENSMUSG00000074939	Chrm5	D	2.36325	2.44287	3.13992	3.40523	2.43644	2.65565	2.93936	2.5793	2.88948	2.94106	2.69328	2.77717	2.89623	2.95492	2.64247	2.76029	0.82572	0.0221747	0.396667	0.70304	1.45517	0.345277	0.572157	-0.593145	0.163249	0.953113	0.243092	0.767923	0.157251	-0.0358711	0.413083	0.39244	1.15211	0.582219	1.63459	1.14334	1.60375	0.917625	0.956744	1.53844	0.545874	0.828317	-0.00518121	0.82009	0.728354	0.948393	-2.65319
ENSMUSG00000032034	Kcnj5	D	3.8595	3.30554	3.44621	3.42369	3.39953	3.62415	3.54573	3.46462	3.49474	3.49358	3.59722	3.50574	3.66619	3.76274	3.40481	3.50431	-1.00706	0.423023	0.251927	0.184193	0.550678	-2.61669	0.26023	0.823541	-0.0117485	-0.593251	0.449997	-0.375437	-0.281022	-0.400214	-1.13134	-0.501272	-1.05415	-0.706572	-0.967626	-1.39355	-0.263741	-1.1189	-1.40501	-0.327946	-0.233027	-0.711078	-0.667812	-1.2606	-1.29851	-1.49426	-1.02202
ENSMUSG00000035451	Foxa1	D	3.83217	3.62315	3.29625	3.36889	3.16513	3.85618	3.47336	3.94934	4.2079	3.71047	4.0958	3.49663	3.84904	4.13534	4.00705	3.66635	-1.05721	-1.05721	-1.05721	-1.05721	-1.05721	-1.05721	-1.05721	-1.05721	-1.05721	-1.05721	-1.05721	-0.666902	-0.731834	-1.05721	-1.05721	-1.05721	-0.839592	-1.05721	-1.05721	-0.440081	-1.05721	-0.45203	-0.720111	-1.05721	-1.05721	-1.05721	-1.05721	-1.05721	-0.599481	-0.450132	-1.05721
ENSMUSG00000000263	Glra1	D	2.96432	3.42311	3.26039	3.35702	2.96337	3.45525	3.54178	3.03949	2.92265	3.03587	2.9465	3.41354	3.18602	3.11632	3.0751	2.9397	-0.0719	-1.38457	0.822776	0.190936	0.180142	0.477665	0.0357258	-0.41374	0.667568	1.0624	0.167736	0.803724	-1.58647	0.645472	0.794644	-1.54361	-2.0424	-2.17952	-2.5099	-2.58522	-2.51893	-2.16077	-2.76595	-1.7866	-2.76595	-2.25746	-2.45748	-2.76595	-2.76595	-2.15887	-1.40345
ENSMUSG00000032291	Crabp1	D	2.32787	3.48139	3.1867	3.46601	2.87838	2.62233	3.12441	3.59911	3.07229	3.11352	2.49441	2.20401	3.08756	2.72668	2.65822	2.63279	0.372241	0.212896	0.552037	1.30139	1.25087	1.16184	0.871257	-0.0992939	0.973659	2.11478	1.16107	1.71994	0.46103	0.915245	1.50577	-1.24486	-1.73923	-0.787952	-1.04161	-0.831988	-0.901968	-0.381785	-0.963528	-1.20927	-1.27269	-1.55832	-0.481577	-1.54191	-0.672325	-1.23696	-1.67405
ENSMUSG00000029831	Npvf	D	2.94184	3.94304	4.36192	3.64304	2.81052	4.05294	3.1605	3.7488	3.03594	3.33545	3.92866	3.58003	4.08815	3.46887	4.41472	4.12636	-1.02231	-1.02231	-1.02231	-1.02231	-1.02231	-1.02231	-1.02231	-1.02231	-1.02231	-1.02231	-1.02231	-0.632006	-1.02231	-1.02231	-1.02231	-1.02231	-1.02231	-1.02231	-1.02231	-1.02231	-1.02231	-1.02231	-1.02231	-1.02231	-1.02231	-1.02231	-0.713842	-1.02231	-0.775371	-1.02231	-0.730152
ENSMUSG00000092035	Peg10	D	3.05924	3.12936	3.32811	3.46307	3.24545	3.42242	3.34422	3.31322	3.26606	3.25538	3.21638	3.50126	3.3383	3.59006	3.2106	3.35105	0.553144	0.198224	1.07992	0.535286	1.16975	1.10966	0.742291	0.0670946	0.489232	1.03867	0.663576	0.774595	-0.0888197	0.360414	0.899663	-1.64836	-1.51354	-1.24338	-1.35313	-1.61584	-0.973843	-1.16475	-1.74004	-1.19665	-1.82939	-1.8635	-1.45646	-0.924858	-1.36304	-1.74009	-1.19411
ENSMUSG00000043441	Gpr149	D	3.43691	3.13598	3.23841	3.63832	2.63659	3.5696	3.21215	2.76187	2.94622	3.05565	3.29576	3.39622	3.5119	3.24148	3.43843	3.33719	-0.487803	0.665257	0.518782	0.594207	0.0529252	0.873457	-0.389003	-2.28263	0.983792	0.751288	0.301985	-0.212323	-0.158223	0.465176	-0.139041	-0.444139	-0.435775	-0.821207	0.0106832	-0.233751	-0.278756	-0.680705	-0.178944	-0.787371	-0.739525	-0.809834	-0.364373	0.224204	-0.778251	-0.726106	-1.2692
ENSMUSG00000025905	Oprk1	D	2.45397	2.41094	2.70035	2.92312	2.44432	2.46234	2.50883	2.15331	2.56756	2.35702	2.73065	2.93869	2.88735	2.87554	2.71892	2.61147	0.630914	0.966841	1.40407	0.463428	0.937745	1.52607	0.880655	1.08402	1.46325	0.884166	1.30672	0.936127	1.31638	0.725746	0.490581	-1.65129	-1.62807	-1.04928	-1.13035	-1.75907	-1.58099	-1.21018	-2.11803	-1.42404	-1.51307	-1.87704	-2.31378	-1.38303	-2.48573	-1.42527	1.04511
ENSMUSG00000041798	Gck	D	3.32525	3.4337	3.35888	3.46144	3.61518	3.47845	3.3597	3.48433	3.10153	3.27606	2.78458	3.1338	3.09407	3.06034	2.88369	2.78851	0.342953	-0.462429	0.842549	0.247894	-0.988929	1.71776	-1.11128	-1.16539	1.13299	0.736449	0.100318	0.746574	-0.209494	0.656024	1.26983	-0.184126	-0.508626	-0.180146	-1.24912	-0.389362	-0.949233	-0.301504	-0.158694	-0.0694398	-0.480582	-0.437549	-0.506331	0.411467	-0.0927999	-0.0860992	-1.75931
ENSMUSG00000019890	Nts	D	2.51391	2.09083	2.7597	2.01119	1.83643	1.84525	2.24574	2.05958	2.80633	2.054	2.21448	2.73112	2.60293	2.78549	2.58926	2.5492	1.42333	1.32464	1.63337	1.56089	1.8539	1.39232	1.75683	0.982452	1.84196	1.57665	1.49279	1.52836	0.699259	1.03956	0.733306	0.349147	0.611314	0.764914	-0.0129463	0.597406	0.396833	0.490894	0.391421	0.209893	0.967075	0.57878	-0.500392	0.54322	0.171067	0.227243	-3.20896
ENSMUSG00000002266	Zim1	D	3.00995	2.76246	2.83387	3.26719	2.59244	3.17305	2.85325	3.27343	3.00815	2.88609	2.73473	2.98728	3.12602	2.98927	2.90299	2.99404	1.26483	-0.419278	1.33112	0.384239	1.30648	1.90633	0.854844	1.17372	0.937204	0.721996	1.2614	1.03951	0.781113	0.459356	1.47353	-1.03633	-0.422195	0.0905635	-0.658172	-0.536373	-0.497944	-0.924868	-0.405207	-0.743411	-1.21395	-0.873907	-1.18148	-1.62316	-0.864318	-0.267115	-2.07192
ENSMUSG00000036699	Zcchc12	D	2.7601	2.73871	2.73786	2.90042	2.62625	2.6833	2.59366	2.68682	2.63263	2.62988	2.7149	2.7545	2.70274	2.77408	2.68088	2.83561	1.03028	1.16506	1.44979	1.32417	1.3783	1.50377	1.38264	0.905223	1.45075	1.44718	1.51367	1.43679	0.979994	1.2829	1.45398	-1.07231	-0.761579	-0.50406	-0.64105	-0.870709	-0.641118	-0.42823	-0.913944	-0.553055	-0.918206	-0.903314	-0.944447	-0.496934	-0.946858	-0.738817	-1.39214
ENSMUSG00000033737	Fndc3c1	D	3.37556	3.61001	4.12576	3.85361	3.6712	3.50048	4.37746	3.25004	3.9069	3.76892	3.84892	3.1698	3.85283	4.17368	3.5315	1.72689	-0.989333	-0.139268	-0.989333	-0.989333	-0.989333	-0.989333	-0.989333	-0.989333	-0.989333	-0.989333	-0.989333	-0.989333	-0.989333	-0.989333	-0.659212	-0.989333	-0.989333	-0.989333	-0.989333	-0.808607	-0.531461	-0.989333	-0.989333	-0.989333	-0.989333	-0.989333	-0.989333	-0.989333	-0.989333	-0.989333	-0.989333
ENSMUSG00000031374	Zfp92	D	2.77244	2.74398	3.1144	3.15299	2.88375	2.99588	2.96712	2.93094	3.04987	2.92864	3.03674	3.214	3.27376	3.12525	2.96953	2.95132	1.07202	0.255073	0.169277	0.428265	0.533305	0.300226	0.443997	0.382303	0.141656	0.959862	0.859175	0.719119	0.318544	0.0987244	0.325991	-0.992082	-0.314523	-0.339509	-0.373981	-0.121321	0.106119	0.202247	-0.321461	-0.0395962	-0.291843	-0.396262	0.128576	-0.17358	-0.189972	-0.305926	-0.559483
ENSMUSG00000023484	Prph	D	3.35305	3.53237	3.03416	2.54162	3.43845	3.08744	3.45684	3.26443	3.01523	3.11574	3.32572	2.77209	3.07213	2.96564	2.84566	2.66711	0.993999	-1.82937	-0.281179	-0.89486	-0.456176	-0.41134	-0.194187	1.21755	-1.71731	-3.21074	-0.144061	0.112551	0.505533	-0.575966	0.073482	-0.826147	-0.823084	-1.20745	-0.212277	-0.322087	-0.296848	0.429143	-0.288487	-0.0777423	0.0276103	-0.946785	-0.316093	-0.113219	-1.28462	-0.427152	0.0417238
ENSMUSG00000038537	Mc3r	D	2.92507	3.28003	3.50964	2.97165	3.42277	2.83023	3.18574	3.15364	3.10071	3.3311	3.63583	3.21119	3.56295	2.92597	3.31962	3.01245	0.908821	0.85094	1.14434	0.530655	0.899397	0.727369	-0.0893749	-1.78523	1.38287	0.605589	0.197127	1.12629	-0.0728953	0.849548	0.569197	-0.867731	-1.21144	-0.97599	-1.78523	-1.04774	-0.579023	-1.45114	-1.78523	-1.38048	-1.40525	-1.27674	-0.369061	-1.21966	-1.53829	-0.423739	-0.699559
ENSMUSG00000031210	Gpr165	D	2.92468	3.10262	3.34198	3.05455	3.01988	3.26238	3.10657	2.94198	3.16629	3.13296	3.19005	3.46899	3.34741	3.37907	3.17693	3.37558	0.264862	0.101221	0.984665	0.736506	0.255704	1.14743	0.670714	-0.448516	0.76544	0.957138	1.15188	1.05119	0.422204	0.708109	0.666689	-1.05858	-0.773848	-0.637711	-0.642097	-0.971809	-0.902216	-1.09008	-1.07635	-0.872392	-1.01384	-1.35609	-1.08145	-0.754579	-0.952757	-0.999473	-1.01245
ENSMUSG00000045518	Onecut3	D	4.15637	3.79045	3.85413	1.4864	4.02397	4.0018	3.59146	3.31101	3.80108	3.59538	3.4872	3.4338	3.57313	3.51022	3.50354	3.53005	-1.09516	-1.09516	-1.09516	-0.611884	-1.09516	-1.09516	-0.0111972	-1.09516	-1.09516	-1.09516	-1.09516	-1.09516	-1.09516	-1.09516	-1.09516	-0.564666	-1.09516	-1.09516	-1.09516	-1.09516	-1.09516	-1.09516	-0.758058	-1.09516	-1.09516	-1.09516	-1.09516	-1.09516	-1.09516	-1.09516	-0.802995
ENSMUSG00000031491	Chrna6	D	1.95359	2.99819	2.40571	3.26693	1.53876	3.10473	4.38347	3.47446	4.14898	2.76377	4.07615	3.23756	3.90877	4.46835	3.78043	2.80394	-1.75886	-0.908797	-0.393783	0.00134044	-1.75886	-1.05618	-1.75886	-1.75886	-0.464627	-0.116266	-1.75886	-0.593635	-0.0465286	-1.75886	-1.16027	-0.405276	-1.75886	-1.75886	-0.644329	-1.75886	-1.75886	-1.75886	-1.75886	-1.75886	-1.75886	-1.48233	-0.105552	-1.75886	-1.75886	0.818893	-0.275613
ENSMUSG00000045871	Slitrk6	D	2.97107	2.78276	3.30025	3.32963	3.06309	2.67179	2.77164	3.48901	3.5494	3.14343	3.13283	3.49431	3.51697	3.22755	3.93112	3.46774	-0.572903	0.322907	-0.198841	0.0840769	0.229291	0.0826022	0.364815	-2.7168	0.810571	-0.871255	0.737493	-0.13889	0.105266	0.465371	0.528837	-0.757505	-1.07686	-1.25457	-1.60227	0.1189	-0.721094	-0.583376	-1.20965	-0.248477	-0.102665	-0.114922	1.2413	-1.1709	-0.79068	-0.139046	-1.63113
ENSMUSG00000005705	Agrp	D	2.77507	3.6588	3.85127	2.83783	3.65474	3.63913	4.0821	4.09533	3.18104	3.63915	3.65321	2.60131	3.50337	2.70327	2.30518	3.44209	-1.55265	-1.12692	-1.97699	-0.216783	-1.97699	0.946934	-0.457744	-1.62792	-1.53008	-1.97699	-1.97699	-0.624591	-0.797509	-0.352035	-0.630617	-0.899028	-0.773794	-0.273504	-1.14768	-0.838769	-1.02556	-0.946769	-0.765313	-1.25652	-1.29652	-0.795762	-1.19862	-1.19462	-0.658812	-1.03923	-0.746271
ENSMUSG00000020123	Avpr1a	D	3.60201	3.04629	3.23007	3.45693	3.48011	3.25616	3.22455	3.32055	3.35957	3.26444	3.16039	3.17348	3.54615	3.24052	3.27548	3.43872	0.500346	-1.45794	-0.76791	-0.184492	-0.11489	-1.24201	0.7776	0.328021	0.660242	0.446123	-0.436464	-0.426649	-0.232361	-0.586728	-0.752125	-0.866737	-1.22114	-1.9447	-1.28238	-0.806478	-0.860261	-0.741234	-0.57773	-0.965348	-1.56471	-0.634952	-1.38223	0.365567	-1.69775	-1.21877	-0.71398
ENSMUSG00000026686	Lmx1a	D	1.96118	2.96087	1.89186	3.08822	2.79072	2.67573	2.82158	2.52595	3.21772	3.00846	3.16672	3.0461	2.75372	2.81969	2.73806	3.25403	-2.0553	-2.0553	-2.0553	-0.921918	-0.361302	-1.35262	-2.0553	-2.0553	-1.60839	-2.0553	-2.0553	-0.0173179	-1.72993	-2.0553	-1.45671	-0.0960071	-0.492766	-0.730738	-0.596987	0.104911	1.79735	-0.31319	-0.303021	-1.07596	-1.67532	-1.17158	1.52558	-0.633132	-0.278381	-0.769183	-1.31251
ENSMUSG00000024553	Galr1	D	2.66987	2.76829	2.66711	3.30407	2.51109	3.16125	2.68314	3.11488	2.44732	2.19125	2.55625	2.87779	2.56979	2.79212	2.93776	3.05423	-0.355379	0.136892	1.42512	1.67945	0.446815	1.78702	0.761571	-0.955208	1.23906	0.978368	1.40944	1.17942	0.215687	1.07878	1.44546	-1.27693	-1.19752	-0.247881	-1.04096	-2.15797	-0.888422	-1.14116	-1.65961	-1.77881	-1.81881	-1.61556	-2.49928	-1.82124	-1.6946	-0.644945	-1.96428
ENSMUSG00000051980	Casr	D	0.187323	1.70701	1.80215	1.44949	2.19435	1.27611	1.71606	2.14179	0.813187	2.13588	1.25954	0.823375	1.76233	1.63975	1.851	1.72095	2.39272	1.37019	2.76171	2.21236	2.58556	3.06766	2.1796	2.38934	2.24534	2.80674	2.99698	2.45789	2.31429	2.57045	2.80105	-2.14502	-1.2858	0.0283242	-1.67158	-1.0068	-0.625189	-0.402906	-1.30535	-0.755844	-1.216	-1.2613	-1.58256	-1.17421	-1.19385	-0.239423	-1.61002
ENSMUSG00000048721	Fndc9	D	2.58833	2.57272	2.94823	2.49916	2.67601	2.49493	2.43364	2.67902	2.55794	2.56912	2.5771	2.51888	2.52688	2.80224	2.61099	2.56388	0.374456	0.727077	1.20838	1.17387	1.03206	0.758286	1.1168	0.543168	1.66366	1.19621	1.31363	1.10768	1.22177	0.705261	1.26526	-1.60632	-1.50226	-1.17653	-1.30758	-1.46564	-0.524786	-1.12654	-1.30713	-1.48007	-1.96109	-1.66909	-0.865163	-1.03262	-1.21342	-1.01676	-0.716352
ENSMUSG00000033774	Npbwr1	D	2.1508	2.69724	2.46084	2.4944	2.05922	2.31344	2.3734	2.43532	2.21439	2.23052	2.29291	2.41287	2.6057	2.43051	2.32242	2.23062	-2.67155	0.565263	-0.153594	0.0445004	-0.841749	0.42105	-0.9757	-2.67155	-0.847062	0.67845	-0.136499	-1.50633	0.0434095	-0.538315	0.493665	0.728301	1.15501	1.44111	1.68042	1.40578	1.75761	0.774987	0.919996	1.13108	1.38754	1.0101	0.268619	1.29552	0.502785	1.43431	-0.786501
ENSMUSG00000029219	Slc10a4	D	2.13838	2.76524	2.06475	2.38796	2.61713	1.86131	3.3778	3.10649	3.38398	2.4576	3.3567	2.54734	2.67751	3.17731	3.11398	2.2846	-1.19445	1.65924	-0.396816	0.213818	0.398135	0.450131	1.97058	-2.21299	2.53017	2.52595	0.0163633	1.53407	0.556524	-0.588034	0.776557	-0.524987	-1.00979	-0.625093	-1.38368	-1.59586	-1.12855	0.00367521	-0.705832	-1.23364	-1.53252	-0.307378	-0.264112	-0.0887328	-0.894811	-0.646471	-1.47019
ENSMUSG00000028753	Vwa5b1	D	2.99611	2.96243	2.92874	2.98175	2.989	2.75153	3.00218	2.72187	2.82823	2.95061	2.62255	2.75136	2.76519	2.75656	2.58326	2.6567	0.850996	0.172603	1.1316	0.811166	0.920992	1.35345	0.993701	0.555172	0.578135	1.14917	0.748058	0.696611	0.732952	0.721177	1.12357	-1.85647	-1.81859	-1.78496	-2.02537	-0.857152	-0.524195	-1.09299	-1.34917	-1.41169	-1.50598	-1.84357	-0.312689	-0.854913	-0.800043	-1.75251	-0.872731
ENSMUSG00000075316	Scn9a	D	2.95343	2.99402	2.87893	3.41772	2.55787	3.25629	3.22658	3.17934	3.24772	3.126	3.23401	3.35475	3.42143	3.38114	3.10596	3.44106	-0.199511	-0.148573	-0.0732231	-0.407463	-0.0380706	0.618436	0.000357863	-0.652142	-0.532989	0.13196	0.040078	-0.352147	-0.23351	-0.287114	0.15014	-1.22161	-0.807103	-0.530227	-1.32243	-1.04599	-1.30146	-0.104092	-0.969414	-0.636751	-1.11348	-1.1621	-1.32782	-0.337042	-0.967645	-1.0043	-0.816227
ENSMUSG00000042353	Frem3	D	2.06637	1.91115	2.16196	1.7529	2.12682	1.6236	2.10426	1.43245	1.47527	1.96499	2.13912	2.18891	1.63568	1.60516	2.10539	1.60158	-0.20944	1.17766	2.0227	2.0716	1.60882	2.0688	1.58717	0.672247	1.76064	2.83289	1.25424	2.18597	1.24416	1.77732	1.7239	0.365346	-0.22262	-0.191454	0.234774	0.579349	0.840146	0.0397851	0.267776	0.248008	-0.270823	0.485878	0.285692	0.667359	-0.530026	0.156258	-1.56881
ENSMUSG00000060044	Tmem26	D	2.4483	2.98066	2.92781	2.32651	3.40573	3.13985	3.06793	3.25954	2.78069	2.78813	3.09728	2.83295	3.25587	2.62693	2.9416	3.06633	0.732786	0.15013	0.321151	1.4103	0.746359	0.535573	0.624008	-1.61869	1.48991	-0.660231	-0.110458	0.0479319	-0.439212	0.822044	0.217717	-1.0882	-0.895137	-1.61869	-1.61869	-1.61869	-1.16082	-1.61869	-1.61869	-1.61869	-1.61869	-0.910417	-0.0790822	-1.61869	-1.37175	-0.585645	-0.694294
ENSMUSG00000055632	Hmcn2	D	2.80962	2.87399	2.19608	2.99766	2.60753	3.09961	2.80623	2.92312	2.17955	2.34152	2.39437	2.58533	2.64317	2.0676	2.35136	1.91517	1.90656	-0.781729	1.28207	0.110655	-0.101971	1.89821	-0.185328	0.558439	0.751332	0.259267	1.4743	0.976616	1.00634	0.926522	0.635136	-1.20279	-0.843275	-0.983708	-0.948801	-1.46678	-0.801648	-1.78354	-0.680104	-1.0181	-0.68915	-1.45019	-0.583438	-1.07634	-0.688214	-0.937717	-1.28891
ENSMUSG00000045534	Kcna5	D	1.90746	2.26196	2.06017	2.73302	2.31792	2.14846	2.38697	2.14385	2.38065	2.46194	2.45573	2.11087	2.1571	2.22839	1.80617	2.35458	0.733055	1.55979	0.733261	1.10127	0.844697	0.943093	0.956704	0.283353	1.54961	1.30018	1.5721	1.11706	1.05668	1.26426	1.52954	-1.65471	-1.6093	-1.10424	-1.58816	-1.30449	-1.02813	-1.80906	-1.39535	-1.479	-1.22452	-0.566399	-2.778	-1.04866	-1.36887	-0.734266	-1.17087
ENSMUSG00000031980	Agt	D	2.21035	2.40573	2.24552	2.25355	2.62992	2.2871	2.59187	2.13568	2.29353	2.4687	2.59272	2.05078	2.22337	2.19199	2.14065	2.24147	0.175843	-0.119346	0.202189	0.118862	0.386993	0.69292	0.526665	0.308633	0.429154	1.15912	0.0308228	0.315618	0.0782649	0.190578	0.595288	-1.14341	-1.5953	-1.00805	-0.930612	-1.17649	-1.03861	-0.885091	-1.10081	-0.926899	-1.10528	-0.975589	-1.11201	-0.492578	-1.13916	-0.995008	-3.06644
ENSMUSG00000023064	Sncg	D	2.86251	3.12783	3.2755	3.07224	3.4043	2.84771	3.26251	3.05076	2.95557	3.1906	3.05223	2.78203	2.90154	2.78853	2.82327	2.99423	-0.616225	-0.0307587	-0.167102	-0.134431	-0.529232	-1.16844	-1.59086	-1.02633	-0.197098	-0.0892987	-0.301855	-0.111708	-0.489869	-0.257232	0.15176	-0.323286	-0.554379	-0.951638	-0.918612	-0.582211	-0.441973	-0.106897	-0.630069	-0.848541	-0.573909	-0.631504	0.144878	-0.522473	-0.442472	-1.21118	-2.4281
ENSMUSG00000063681	Crb1	D	2.30352	1.85994	1.91162	1.78807	2.63365	2.24234	2.29777	2.1088	2.00674	2.24523	1.88349	2.27795	2.01389	2.09619	1.82803	2.17865	1.68117	1.65025	1.40599	0.862784	1.05927	1.06269	1.35318	1.81442	1.46534	1.79094	2.09798	1.04925	1.5575	2.02542	1.57988	-1.41317	-0.802147	-0.239442	-0.401276	-0.926687	-0.448234	-0.557144	-1.7864	0.508255	-0.993293	-0.938292	-0.730745	0.0374654	-1.07195	-0.660488	-0.322859
ENSMUSG00000037681	Esyt3	D	2.60123	2.79049	2.58845	2.79632	2.32937	2.59609	2.75899	2.63444	2.36999	2.53524	2.41541	2.47199	2.57228	2.34172	2.48631	2.57456	0.938689	-0.00902998	1.5704	0.391241	0.486073	1.65507	0.0485461	0.614814	0.795413	1.20154	0.913405	1.1478	0.251623	1.20963	1.24316	-0.837911	-0.672388	-0.339472	-0.743062	-1.35627	-0.471167	-0.305768	-0.81368	-0.280755	-1.11919	-0.792853	-1.14935	-0.248748	-0.633295	-1.04291	-1.10889
ENSMUSG00000051159	Cited1	D	3.06407	3.06734	2.8204	2.58463	3.17498	3.24765	3.45374	3.04826	3.02873	3.05608	3.10413	2.53602	3.09301	2.74228	2.62624	2.46134	-0.860171	-0.327485	-1.63479	-1.26653	-1.07118	-2.36509	-0.74859	-0.347014	-0.234843	-1.20908	-0.825774	-0.400326	-0.970692	-1.25768	-0.686468	-1.04009	-1.59748	-1.36527	-1.54809	-1.38888	-1.48771	-1.94146	-1.83638	-1.05385	-1.07964	-2.35564	-1.0934	-0.83596	-1.25386	-1.8895	-0.51009
ENSMUSG00000047773	Ankfn1	D	1.42551	1.75191	2.3351	1.86538	2.06063	1.85845	2.09638	1.51126	1.94146	2.0277	1.22183	2.14602	2.03566	2.24472	1.49556	2.10041	1.98472	2.0953	2.09958	1.8848	1.39538	2.20754	2.19786	2.0875	1.55027	1.28976	1.9087	1.68716	1.5031	1.73867	2.15316	-1.53126	-2.02193	-1.68057	-1.2694	-1.35655	-1.68665	-1.97492	-1.63818	-3.00514	-1.00036	-1.27218	-1.46553	-1.45924	-1.30903	-2.27922	-1.64264
ENSMUSG00000031355	Arhgap6	D	1.98682	1.89786	1.8863	2.09947	1.74829	2.20829	2.20016	1.61627	2.0115	1.88888	2.01514	2.24964	2.20032	2.14537	1.96038	2.03656	1.87641	1.7375	1.80564	1.72538	2.0559	2.0459	2.17837	1.94861	1.74363	1.71328	1.73696	1.64876	1.41974	1.54799	1.75535	-1.70217	-1.55159	-0.868189	-1.36254	-1.34965	-1.36628	-0.270849	-1.89985	-0.922462	-1.26717	-1.44607	-1.20656	-0.702429	-1.84027	-1.27794	-0.834789
ENSMUSG00000006270	Vax1	D	2.83456	2.78056	2.69223	2.75213	3.89169	2.81605	2.82551	1.79095	2.00162	2.45304	2.41928	2.30617	2.68023	2.80925	2.08872	1.88325	-1.72113	0.490705	0.112202	-1.01208	-2.14547	-0.784358	-0.29228	-2.14547	0.174816	0.949761	0.193144	0.505626	0.676602	0.224318	0.0560652	-0.105999	-0.50552	-1.14327	0.198902	-0.625239	0.20748	-0.647683	-1.53531	-0.588106	-0.140685	-0.239857	-0.288545	0.129465	-0.534969	-0.712346	-0.0949246
ENSMUSG00000032259	Drd2	D	1.71202	2.35892	2.13784	2.73584	2.71315	1.99122	2.4143	2.5937	2.44578	2.1011	2.44034	2.11046	2.44066	2.35194	2.13583	2.52951	0.107688	0.809431	0.126222	0.532338	0.927533	-0.524299	1.4204	-0.481094	1.69842	2.16034	-0.131395	1.07254	1.6751	0.947559	0.357707	-1.10502	-0.601564	-0.371621	-0.373371	-0.360737	-0.534627	-0.585527	-0.702695	-0.634912	-0.674829	-0.403845	-0.699206	-0.498968	-0.564044	-0.957175	-0.621173
ENSMUSG00000034810	Scn7a	D	2.3244	2.24136	2.26678	2.26715	1.91205	2.60231	2.70247	2.36797	2.74287	2.55836	2.29444	2.37101	2.65942	2.89945	2.50916	1.65749	-1.1212	0.615335	0.901723	0.920704	0.762928	0.79241	0.792999	0.226177	0.828281	0.0190777	1.15386	-0.146508	0.82886	0.477057	0.747281	-0.818375	-0.300473	0.0624891	-0.195166	-0.385383	-0.0309304	0.250919	-0.567183	-0.653128	-0.811232	-0.35336	0.127124	-0.0486538	-0.475406	-0.552808	0.201476
214604	NA	D	1.93967	1.77342	1.98052	1.26603	2.38246	1.93336	2.16691	1.66144	1.6791	1.85618	1.68347	2.08141	1.8832	1.96113	1.68259	1.54813	2.126	2.08044	2.22837	1.3691	2.35378	1.31173	1.55265	0.687446	1.43599	1.6509	2.32412	1.91902	1.81523	1.57131	2.27197	-1.39309	-1.35378	-1.35739	-1.80918	-0.378844	-1.74767	-0.170411	-1.12288	-2.54703	-1.49747	-1.44563	-1.85133	-1.55387	-1.74802	-1.98138	-1.56941
ENSMUSG00000050875	Minar2	D	2.34657	2.46565	2.70793	2.53764	2.40897	2.4587	2.40696	2.42574	2.45342	2.36523	2.51269	2.55717	2.54602	2.4885	2.42897	2.579	0.0102583	-0.109692	0.257553	0.0513597	0.227974	0.311775	-0.163353	0.0166822	0.0109674	0.192556	0.507249	-0.00946852	-0.064853	0.165498	0.446931	-0.21295	-0.181511	-0.000655016	-0.172156	-0.0897103	-0.119631	-0.0465951	-0.264038	0.0557753	-0.289215	-0.0673405	-0.452218	-0.0344492	-0.308005	-0.134074	-0.196112
ENSMUSG00000070337	Gpr179	D	2.97238	2.85664	2.48592	3.28312	2.60508	3.03952	2.77421	2.40442	2.78267	2.86376	2.93963	2.49555	2.44616	2.5609	2.60375	2.39246	-0.427248	-0.648192	-0.471488	-0.173538	0.220381	0.680387	0.865085	1.10851	0.19808	1.1178	0.0425195	-0.092142	-0.0177067	-0.196829	0.845685	-2.10595	-1.02767	-0.996507	-1.35468	-1.34305	-1.68223	-1.71742	-2.09257	-1.6152	-1.35031	-1.92272	-0.816909	-0.445264	-1.33508	-2.25294	-0.55078
ENSMUSG00000020090	Npffr1	D	2.60007	2.34237	2.61989	1.70156	2.79332	2.47402	2.11588	2.28813	2.14863	2.3992	2.16768	2.21132	2.0345	1.66699	1.89089	1.64449	1.58946	-0.209406	1.31781	0.46631	-0.460763	0.677924	-0.290507	0.788852	1.57517	0.466362	1.1336	1.36537	0.687925	1.03164	0.620827	-0.455384	0.430671	0.718495	1.05766	0.473976	0.602667	1.4483	-0.553867	-0.445772	0.572737	0.284279	-0.998511	0.0911302	0.0396305	-0.0770957	-1.87968
ENSMUSG00000024256	Adcyap1	D	2.47975	2.21101	2.50518	2.58546	2.24697	2.37819	2.22589	2.44028	2.64322	2.37872	2.49814	2.68731	2.91058	2.62594	2.60242	2.8152	-0.188869	-0.0498075	-0.118976	0.276176	0.0747903	0.242095	0.539192	-0.0408205	0.400393	-0.0654706	0.751795	0.41765	0.373434	0.00357743	0.289895	-1.95638	-1.44866	-1.5587	-2.18555	-1.50348	-2.23891	-1.4198	-2.20899	-1.69359	-1.86628	-1.94062	-1.99812	-1.54657	-1.82572	-2.12735	0.0852726
ENSMUSG00000000766	Oprm1	D	2.41604	2.4359	2.24869	2.12678	2.54132	2.27944	1.94802	2.1536	2.79613	2.51379	1.93505	2.28998	2.23678	2.2803	2.2815	2.24789	1.15694	0.555531	1.61802	0.949979	-0.3821	0.907597	0.979947	1.20943	1.36252	0.545025	0.665699	0.743979	1.26467	1.17767	1.22458	-1.11367	-0.192289	-0.162674	0.889097	-0.687428	0.427283	-0.710904	-0.583734	0.0453073	-0.565983	-1.4523	-0.919848	0.0753296	-0.639909	-1.0499	-1.41162
ENSMUSG00000033061	Resp18	D	2.47609	2.52334	2.73054	2.52854	2.62182	2.55663	2.38214	2.56121	2.34912	2.46686	2.47181	2.41751	2.45016	2.38144	2.41356	2.53698	0.315777	0.0354674	0.451484	0.615942	0.278444	0.964515	0.505443	0.077691	0.539602	0.728291	0.575362	0.69664	0.281127	0.39074	0.810542	-0.82467	-0.799385	-0.852673	-0.67817	-0.859455	-0.519142	-0.562948	-1.3251	-0.830126	-0.874884	-1.06025	-1.50142	-0.611908	-1.07623	-0.934869	-0.107021
ENSMUSG00000030500	Slc17a6	D	2.45183	2.40592	2.61312	2.65749	2.41369	2.39277	2.44445	2.74322	2.8248	2.69524	2.71818	3.02389	2.99898	2.83859	3.03842	3.0132	-0.381837	0.267545	0.435029	0.457728	0.171824	0.356181	0.835309	0.120811	0.561386	0.365177	1.12157	0.426532	0.159936	0.206655	0.484747	-1.09896	-0.818931	-1.10277	-1.76464	-0.547813	-1.53373	-1.48335	-1.13642	-1.39646	-0.927971	-1.24486	-0.255507	-1.0829	-1.44792	-2.18457	-0.483375
320014	NA	D	2.95232	2.60998	1.84771	2.92847	2.75788	2.56661	2.59537	2.42159	2.55506	2.66382	2.8074	2.86742	2.78472	2.34526	2.87045	3.13524	-0.0542939	-0.574273	-0.424036	1.07334	0.496172	1.02672	-0.436405	0.396561	0.732928	-0.426344	-0.880618	-0.0311512	-1.14092	-1.12246	0.663151	-0.733303	-0.393111	-0.367756	0.0126731	0.28824	0.0400592	-1.35047	0.00609984	-0.398289	-1.02663	-0.41883	0.447918	-0.818198	-0.637474	-0.389134	-1.66349
ENSMUSG00000028602	Tnfrsf8	D	1.56213	2.2333	2.01663	1.67936	2.20158	2.41949	2.42745	1.70291	2.158	2.09985	2.16284	2.11183	2.2648	2.08904	1.71381	2.27938	0.328007	-0.436615	0.438928	1.57175	1.27747	0.433361	0.0879686	0.999519	1.3325	1.25675	1.57769	0.659952	0.506735	1.27362	1.47897	-0.781135	-1.06428	-0.77815	-0.47116	-0.341209	-0.0130976	-2.36604	-0.505229	-0.397134	-1.04029	-0.544176	-0.712732	0.139768	-0.439922	0.303546	-0.239373
ENSMUSG00000006522	Itih3	D	2.48498	2.69073	2.80045	2.55126	2.74052	2.60646	2.81773	2.51932	2.54649	2.7572	2.6943	2.54525	2.61918	2.49553	2.4479	2.51252	-0.820458	-0.910141	-0.298471	-0.991364	-0.572626	-0.227495	-0.820983	-0.831678	-0.398362	0.000976416	-1.02665	-0.350096	-0.75517	-0.426498	0.0463198	-1.07759	-1.3442	-1.38693	-1.41271	-1.36128	-1.48776	-1.12642	-1.50944	-1.35414	-1.24308	-1.39674	-1.05558	-1.14874	-1.42624	-1.35092	-1.17868
ENSMUSG00000018589	Glra2	D	1.23793	1.7769	1.94649	2.15991	1.60877	1.80134	1.55423	1.84784	1.93363	1.90189	1.86305	2.31109	2.05892	2.06879	2.304	2.08261	-0.103278	0.67721	1.26599	1.07009	1.42991	1.55826	1.16479	0.928702	1.27259	1.27389	1.38847	1.10948	0.928836	0.959163	1.30383	-0.677047	-0.294872	-0.278149	-0.470755	-0.32489	-0.197965	-0.0888413	-0.652388	-0.556074	-0.369459	-0.581755	-0.653221	-0.43591	-0.718353	-0.661055	0.0365261
ENSMUSG00000045005	Fzd5	D	3.07698	3.07372	2.67818	3.16276	2.70761	2.92576	3.01218	2.6392	2.76399	2.83279	2.66292	2.37694	2.62773	2.76605	2.44711	2.21944	-1.30324	-0.0853735	-0.239948	-0.334415	-0.28766	0.368603	-0.554071	-0.142329	0.0444742	-0.342354	-0.569529	0.00260194	-0.629755	-0.88941	-1.03608	-1.13306	-0.756221	-1.48296	-0.65064	-0.593578	-0.529924	-1.01911	-0.646814	-1.16909	-0.787884	-2.16598	0.0535056	-0.784789	-1.02181	-0.947795	-0.689215
ENSMUSG00000034918	Cdhr2	D	2.67443	2.43471	2.90224	2.33914	1.92996	1.90497	2.52729	2.41129	2.15742	2.42657	1.93669	2.42326	2.18712	2.27294	2.56026	1.79005	0.388684	0.656403	1.28168	0.580002	0.428436	0.14546	-0.393484	-2.51766	1.33388	0.217735	1.39106	-0.0982785	0.404109	0.857998	0.727981	-0.478191	-0.804246	-0.192213	-1.2792	-0.997431	-1.09498	-1.91248	-0.656843	-0.228917	-1.1919	-0.532904	-0.97805	-0.172907	-0.907161	-1.23154	-0.467116
ENSMUSG00000046844	Vat1l	D	2.155	2.17701	2.25749	2.27828	2.28991	2.20318	2.1508	2.25534	2.19139	2.26311	2.18229	2.171	2.20468	2.18858	2.10938	2.18795	0.30077	0.38009	0.718938	0.652338	0.731306	0.509315	0.604316	0.188167	0.68023	0.733426	0.878214	0.662319	0.381741	0.289308	0.405048	-1.47064	-1.67468	-2.01439	-1.97847	-1.67205	-0.453343	-1.78334	-1.99862	-2.15126	-1.77431	-2.07096	-0.94982	-1.40904	-1.92394	-1.62772	-1.36129
ENSMUSG00000044646	Zbtb7c	D	2.18255	1.89257	2.09488	1.82703	2.09945	1.84974	1.84211	2.01369	1.62975	1.78025	1.5676	1.60965	1.83321	1.69194	1.40826	1.38513	1.20645	0.516213	1.40116	1.29515	0.992102	1.55441	0.66578	0.808678	1.48763	1.3928	1.03939	1.09436	1.11477	0.914692	1.37198	-1.18438	-0.952605	-0.574736	-0.940178	-1.35821	-0.933043	-1.35276	-1.33966	-1.44409	-1.12585	-1.36456	-1.23665	-0.707241	-0.93354	-1.69414	0.121098
ENSMUSG00000022076	Klhl1	D	2.52218	2.71153	2.32293	2.6312	2.5365	2.24686	2.49268	2.48057	2.6982	2.63219	2.76241	2.71812	2.81353	2.79378	2.79538	2.80941	-1.56732	-0.4938	-0.76139	-0.35805	0.254471	-0.254543	0.160809	-0.921989	0.762703	0.412052	-0.354163	-0.168947	-0.256123	-1.80595	0.24262	-1.58165	-1.20195	-1.38955	-1.5206	-1.58774	-0.979262	-1.45251	-1.43953	-2.33411	-0.709459	-1.75918	-1.45508	-1.35938	-1.95259	-1.19647	-0.614286
ENSMUSG00000038295	Atg9b	D	2.26468	2.09571	1.97618	1.56273	2.37012	2.05798	1.78907	2.19047	1.98705	2.08459	1.99735	1.97878	1.91928	1.88548	1.87032	1.94482	0.653099	0.256148	0.979429	0.55598	0.418569	1.13846	0.546544	0.0830145	0.683409	0.973538	0.732988	0.464751	0.53815	0.720876	0.517732	-0.369642	-0.627925	-0.313871	0.365707	-0.465995	-0.0518007	-0.000928603	-0.228642	-0.168215	0.151661	-0.353671	-0.542952	-0.512941	-0.427209	0.133441	-0.0853817
ENSMUSG00000074607	Tox2	D	2.1319	2.13042	2.08048	1.9778	2.41728	2.20393	2.04682	2.06008	1.9484	2.12976	1.88927	1.84476	1.88599	1.93069	1.74431	1.9507	0.487985	0.241493	0.84039	0.663205	0.386394	0.700799	0.455121	0.531727	0.962762	0.796407	0.88162	0.79241	0.642128	0.735682	0.424498	-0.26085	-0.101895	-0.117528	-0.131523	-0.0839676	0.306186	-0.240611	-0.139068	0.106917	0.0627909	-0.181354	-0.240681	0.0983449	-0.227589	-0.078336	-0.471916
ENSMUSG00000006930	Hap1	D	2.26747	2.30493	2.18166	2.11991	2.35077	2.1918	2.11863	2.01011	1.81649	2.10205	1.90961	1.91941	1.88577	1.9314	1.78786	1.85633	1.1828	0.696157	1.46185	1.17438	1.14383	1.52027	1.01695	0.772343	1.38975	1.3293	1.3858	1.29769	0.909858	1.3661	1.45723	-0.883968	-0.769727	-0.58913	-0.456943	-0.784883	-0.301757	-0.513566	-0.856035	-0.554456	-0.704112	-0.650764	-1.21318	-0.359574	-0.614431	-0.511612	-1.72963
ENSMUSG00000038872	Zfhx3	D	2.47831	2.21831	2.20188	2.45019	2.50512	2.48818	2.39057	2.26867	2.50383	2.23931	2.40217	2.60751	2.49205	2.63568	2.21046	2.21424	0.30779	0.74636	0.971621	0.346286	1.19506	0.822037	0.662676	-0.560484	1.1652	1.33235	0.586694	0.458059	0.604329	0.595255	0.937544	-0.766829	-0.92908	-0.716688	-1.23791	-0.803203	-1.05049	-0.523241	-1.14204	-0.953689	-1.05376	-1.14694	-0.0200516	-0.996388	-1.09396	-1.15061	-0.928496
ENSMUSG00000025094	Slc18a2	D	2.37107	2.57231	2.30115	2.89176	2.04104	2.52159	2.97873	2.69856	3.07321	2.46539	3.15665	2.51882	3.00756	3.09229	2.71418	2.81763	-1.21334	-0.69921	-0.540719	-1.3426	-0.371937	-0.798038	-0.799776	-0.920357	-0.900577	-1.1587	-0.679891	-0.900085	-0.804386	-1.27512	-1.12521	-0.477006	-0.299953	-0.0907634	-0.368767	-0.162491	-0.555319	0.122237	-0.518659	-0.591952	-0.440461	-0.0654907	-0.284341	-0.68347	-0.50502	-0.581631	-0.134028
ENSMUSG00000091345	Col6a5	D	1.60536	1.92942	2.03903	1.70049	2.25743	1.52217	2.2555	2.11551	1.95418	2.08472	1.10949	2.02148	2.00579	2.10507	1.51676	1.03283	1.48037	0.84801	1.34484	0.197204	1.86442	1.60097	-0.351364	-0.145892	1.15388	1.74642	0.101262	1.14687	0.244028	1.01307	1.67749	-0.0480837	-0.558393	0.0102438	-0.171002	-0.236388	0.0832263	0.00923709	-0.518784	-0.710651	0.0310777	-0.994847	-0.257829	0.294806	-1.69455	-1.15446	-0.930287
ENSMUSG00000049555	Tmie	D	2.07824	2.32843	2.44116	2.24415	2.44831	2.32959	2.39056	2.10897	2.10769	2.23481	2.27274	2.16636	2.11	2.23844	2.12964	2.40957	0.682656	0.461086	1.03479	0.780847	0.73037	1.53972	0.966613	0.526127	0.823037	1.20689	1.03367	0.842325	0.727954	0.692944	0.829287	-1.5601	-1.66698	-1.50151	-1.66713	-2.06816	-1.18371	-0.974962	-1.49131	-1.5264	-1.97677	-1.70277	-0.834076	-1.26056	-1.60802	-1.69295	-0.93277
ENSMUSG00000006342	Susd2	D	2.29567	2.21787	1.99945	2.14052	2.28893	2.17228	2.17644	1.45796	1.96649	2.07366	1.79398	1.99169	1.77288	1.97691	1.79591	2.04395	0.251912	1.07378	0.673367	1.07802	0.837809	0.498574	1.0708	0.777929	1.19518	0.880729	1.21786	1.04756	0.862263	0.838798	0.798878	-1.90169	-2.01866	-2.1547	-1.50472	-1.57322	-1.49609	-1.5944	-1.65027	-1.65983	-1.35173	-2.41004	-1.7838	-1.97709	-1.83619	-1.88969	-0.359234
ENSMUSG00000045915	Ccdc42	D	0.353345	0.795941	0.216606	1.00081	0.036084	0.992401	0.0127613	-0.36566	-0.427396	0.358175	0.144912	-0.122673	-0.265006	0.0251812	0.439887	-0.512704	1.82059	1.83652	3.03304	2.62619	2.40967	2.84634	2.56776	1.44477	2.9061	2.56725	3.36495	2.41457	2.27649	2.74573	2.6187	-0.372669	-0.846821	-0.972338	-0.911171	-0.911642	-0.435363	0.298545	-1.05308	-0.591323	-0.35361	-1.5201	-1.14406	-0.0544206	-0.783308	-0.814237	-2.02523
ENSMUSG00000032297	Celf6	D	2.23712	2.18567	2.20351	1.87698	2.2487	2.0471	2.03704	2.01785	2.06645	2.07231	1.96748	1.93157	1.97103	2.01847	1.84084	2.08441	0.794949	0.259607	0.648148	0.468487	0.508398	0.696114	0.562598	-0.0906612	0.610325	0.448083	0.702471	0.615862	0.369317	0.409232	0.374412	-0.310607	0.0206483	0.0239738	0.155923	-0.0549291	0.187314	-0.174548	-0.294725	0.0987975	-0.233599	-0.133227	-0.395928	-0.205408	-0.052562	0.0369021	-0.56332
ENSMUSG00000020182	Ddc	D	2.52776	2.56256	2.35712	2.85285	1.96373	2.42845	2.77717	2.45311	2.72939	2.07274	2.81313	2.40296	2.71668	2.89534	2.49065	2.60812	-0.551316	-0.631941	-0.0265093	-0.293862	-0.0275169	0.544978	0.00281229	-0.67745	0.249735	0.209462	-0.314091	-0.487359	-0.345757	-0.130019	0.313405	-0.24605	-0.83183	-0.967774	-0.879323	-0.579677	-0.623244	-0.746051	-0.31969	-0.839372	-0.356248	-0.365649	-0.550952	0.0637594	-0.650176	0.0657537	-1.04845
ENSMUSG00000049154	Fam183b	D	1.47092	2.03991	2.31866	1.78234	2.35529	2.29889	2.29583	2.25526	1.85094	2.26247	1.65527	1.92157	1.80543	1.81983	1.55752	1.81294	0.0961552	-1.23817	0.729139	-0.0265252	0.850895	0.490453	-0.952624	0.0897566	0.0634167	0.799045	0.161126	-0.0316575	-0.48974	0.648407	0.553224	0.670777	0.263117	0.110514	-0.0135685	0.604306	0.509493	0.72185	0.91979	0.373418	0.556077	0.860176	0.450169	-0.12904	0.778536	0.942296	-1.05132
ENSMUSG00000020098	Pcbd1	D	2.36277	2.59073	2.60101	2.60983	2.61976	2.35351	2.63101	2.44354	2.47625	2.62064	2.3901	2.47674	2.45143	2.50536	2.42454	2.50498	-0.31673	-0.721869	0.162576	-0.0399292	0.392187	0.0129999	-0.341079	-0.0185466	0.518923	0.459158	-0.0803046	0.230642	-0.301533	-0.132476	0.46517	-0.638033	-0.96813	-0.454584	-0.630328	-0.610892	-0.544998	-0.881175	-0.94741	-0.753431	-0.059961	-0.883981	-0.333847	-0.722766	-0.473967	-0.800501	-1.30098
ENSMUSG00000034282	Evpl	D	2.12968	2.13456	1.74033	1.4512	2.30558	1.74551	1.9026	2.2323	1.8468	1.91029	1.80958	1.75332	1.66698	1.69893	1.61781	1.60797	0.704322	0.740743	0.667492	0.719423	0.301826	0.820609	0.820646	-0.0622142	1.40729	1.3196	1.00909	0.840448	0.759986	0.944578	1.15273	-0.59178	-0.58268	-1.11001	-1.26238	-0.672986	-0.720355	-0.996194	-0.830073	-0.421507	-0.680527	-0.946064	-0.703369	-0.62822	-0.74484	-0.875205	-0.164186
ENSMUSG00000063704	Mapk15	D	1.9603	2.07165	1.92284	1.92395	2.12694	1.81083	2.3833	1.90953	1.89433	1.99302	1.59426	1.43345	1.63086	1.62033	1.7854	1.38774	1.79581	0.000264152	1.15645	0.670409	1.03357	1.53528	0.365274	0.295422	1.12301	1.10923	-0.109211	1.28236	0.693668	1.63648	1.07167	-0.513848	-0.97808	-0.276766	-0.277638	-0.28225	0.36611	0.453038	-0.344722	0.0963875	0.0421021	-0.710982	0.333843	0.236132	-0.120942	-0.398664	-1.61534
ENSMUSG00000027520	Zdbf2	D	1.8288	1.75118	1.90735	2.48266	1.72536	1.958	2.01205	2.21624	2.2316	1.97129	2.14186	2.38544	2.3152	2.4374	2.18993	2.27406	0.746456	0.569954	0.898663	0.421339	1.09396	0.923825	1.03328	0.132398	0.41936	0.853471	0.664628	0.751909	0.258203	0.248548	0.648906	-0.703619	-0.24035	0.217959	0.0532348	-0.367112	-0.0141863	-0.0313862	-0.477167	-0.0797097	-0.302631	-0.580953	-0.392004	-0.00366861	-0.403311	-0.744157	-0.337304
ENSMUSG00000031298	Adgrg2	D	1.94382	1.82398	1.82403	1.5576	1.97792	1.83075	2.06698	2.00454	2.39136	1.90952	2.3797	1.87803	2.38792	2.34051	1.96389	1.95131	0.849899	0.082574	0.508156	0.82053	0.41358	0.702929	0.839544	1.60091	1.021	-0.0993856	0.644044	0.452694	1.28838	0.147103	0.40635	-0.491348	0.113138	0.0195874	-0.38315	0.0380631	-0.170562	0.108677	0.121659	-0.315635	-0.222711	-0.0488748	0.367981	-0.371918	0.0496269	-0.00896869	-0.161722
ENSMUSG00000042761	Mrap2	D	2.20035	2.21659	2.5686	2.04947	2.37413	2.05841	2.13677	1.9462	2.19051	2.22287	1.97929	2.23941	2.17006	2.15377	2.16349	2.10915	0.73348	0.460078	1.10719	0.861739	1.07595	1.0898	0.13475	0.71428	0.731703	0.545599	1.12636	0.797406	0.589937	0.791885	1.08953	-1.64799	-1.73851	-1.22388	-0.752263	-1.30155	-0.451381	-0.739492	-2.35015	-1.25259	-1.06475	-1.45483	-1.05199	-1.07086	-1.70828	-1.44357	-1.07987
ENSMUSG00000024164	C3	D	1.25242	1.81564	2.13247	2.10585	1.92105	1.35932	2.71145	0.980138	1.8446	2.0208	1.64347	1.46864	0.91941	1.79517	0.981021	1.56337	-2.95628	-0.320109	-0.438318	-1.82289	1.10106	-0.52527	-2.95628	0.589165	-1.28784	0.823364	-2.15898	0.0136137	-0.241314	0.266722	-0.463619	0.443577	0.0142167	0.257094	-0.0670237	0.684929	-0.0785838	1.45823	0.894104	0.465379	0.815159	0.407791	1.91994	1.4469	0.607844	-0.145539	-1.36161
ENSMUSG00000034755	Pcdh11x	D	1.43758	1.68177	1.61327	1.83322	1.55082	1.87756	1.7134	1.77836	1.90025	1.85351	1.80702	2.0815	1.94239	1.89763	1.72626	2.06971	0.744641	0.829459	1.25798	1.1319	1.13993	1.32427	1.01525	0.523341	0.904715	1.49701	1.43799	1.40172	0.643704	0.904546	1.17068	-0.65412	-0.65752	-0.683237	-0.653644	-0.616973	-0.318768	-0.248524	-1.13858	-1.03558	-0.704331	-0.807694	-0.830085	-0.326611	-0.941196	-0.654245	-0.178369
ENSMUSG00000034993	Vat1	D	2.43572	2.58811	2.60652	2.3581	2.73143	2.41231	2.52941	2.36467	2.28494	2.49236	2.30377	2.18498	2.2037	2.38503	2.23886	2.29867	-0.129205	0.206495	0.320192	0.253459	-0.0121065	0.522035	0.093229	0.160747	0.374688	0.653963	0.346106	0.507789	0.13008	0.228328	0.0966899	-0.885537	-1.12629	-1.38516	-1.04293	-1.38413	-1.05413	-1.07455	-0.99923	-0.981134	-1.37623	-1.20178	-1.23495	-1.1086	-1.08871	-1.28396	-0.775617
ENSMUSG00000068762	Gstm6	D	2.0853	2.04859	2.10846	1.6146	1.76319	2.20218	2.01983	2.03469	1.82281	1.97791	1.88818	1.67585	1.98242	1.71392	1.82908	2.07817	0.428959	0.0841327	0.844085	0.41955	-0.0148024	0.652037	-0.298346	-0.994332	0.602615	0.0786518	0.201732	0.4661	0.187269	0.325513	0.587217	0.285989	0.639994	0.184849	0.398888	0.419236	0.530341	0.485385	0.46556	0.641708	0.19273	0.449535	0.0736312	0.485999	0.558689	0.490794	-1.46949
ENSMUSG00000024011	Pi16	D	2.25055	2.20175	2.1379	1.15797	2.50523	2.31343	2.2551	1.90575	1.93519	2.2653	1.9654	1.91502	2.28948	2.04119	1.57213	1.89207	-0.636018	-0.450685	1.12412	1.15857	0.227711	1.3517	0.194182	0.133542	1.98654	0.394249	0.614619	0.522747	0.682852	0.0712285	0.641373	-0.847969	-0.854133	-0.714091	-1.7729	-0.643546	-0.960919	-1.14532	-1.02662	-1.68867	-0.137852	-1.24921	-0.938561	-1.07193	-0.762979	-0.793265	-1.65672
ENSMUSG00000068617	Efcab1	D	1.52554	1.2416	1.61047	1.81262	1.25228	1.46278	1.21237	1.74071	1.62194	1.24625	1.53112	1.64756	1.85956	1.89635	1.84893	1.72697	0.664926	0.832444	0.84399	0.894151	0.477088	1.35145	-0.68726	1.34215	-0.117664	0.169953	1.15029	0.685225	0.493887	0.950236	0.789598	0.190087	0.455076	0.678079	0.424787	0.590479	0.614896	0.158584	0.548727	0.417447	0.705983	0.541305	0.826099	0.668495	0.120177	-0.34665	-0.522655
ENSMUSG00000039313	Minar1	D	1.39063	1.72108	1.88614	2.22274	1.9602	1.78999	1.87569	2.14822	2.24597	2.19063	1.7679	2.07787	2.31046	1.91254	1.7597	2.25142	-0.495048	-0.0016527	-0.672778	-0.509794	-0.2859	-0.256637	-1.0016	-4.37065	-0.755157	-0.110833	-0.294805	-0.407031	-0.740183	-0.10478	0.0942647	-0.551968	-1.2576	-1.04477	-1.6412	-1.00023	-0.949578	-1.7975	-1.49938	-1.08611	-1.2275	-1.92786	-1.18393	-1.31415	-1.45722	-1.67171	-0.538382
ENSMUSG00000027070	Lrp2	D	1.09862	2.07669	1.54646	0.95968	2.0787	1.95023	2.05179	1.46985	1.90241	2.44414	2.01588	1.42358	1.97692	1.86818	1.57475	1.67287	-0.733478	-1.04677	-0.694993	0.528375	0.480313	-0.382304	-1.11559	0.336652	-1.1414	1.0944	-2.18179	0.596006	-1.30259	-0.784675	0.35471	0.344917	0.557447	0.828594	1.1332	0.639359	0.509835	0.547554	0.789937	0.742551	0.69283	0.434676	1.18399	0.881094	1.23585	0.948511	-1.54916
ENSMUSG00000021879	Dnah12	D	2.13145	1.80808	1.29677	2.09267	1.65997	1.64188	2.23086	1.80779	2.32896	1.8627	1.56169	1.86213	2.3207	1.65857	1.80935	1.76525	-0.554416	-0.0616955	0.45589	0.282419	0.830757	0.0248706	-2.36562	1.91088	-0.565206	-0.156815	-0.940794	-0.319457	-0.696665	0.241279	0.750299	-0.558777	0.14522	1.02383	-0.825775	0.617667	0.173422	1.54556	0.68024	0.336185	0.113556	-0.253715	0.672843	0.785823	0.17294	-0.832558	-0.494929
ENSMUSG00000085925	Rtl1	D	1.8847	2.09387	1.68859	1.50323	2.08101	1.42314	2.21894	1.86397	1.96664	2.19081	1.66676	1.63181	1.76381	1.68426	1.18429	1.73347	1.06206	-0.0141833	0.75156	0.0196465	-0.91925	1.11643	-0.357853	0.808482	0.585899	0.721499	-0.219522	0.965515	-0.10353	1.05589	1.29612	-1.41754	-0.930006	-1.86332	-0.67535	-1.07182	-0.303951	-0.450602	-2.30685	-1.04581	-0.262055	-1.12304	-0.21274	-0.441244	-1.03522	-0.106302	0.203221
ENSMUSG00000035539	Ccdc180	D	1.42422	2.08902	2.33666	2.08632	2.12497	2.59582	2.57186	1.31223	2.02932	2.2611	1.4486	2.17425	2.32567	1.47835	1.61355	2.04071	1.077	-0.0355986	0.00241795	-1.16694	0.856776	-0.414549	-0.0502311	0.837529	-1.86409	0.389102	-2.47411	-0.783953	-0.157638	-0.0176633	0.0623954	0.242704	-0.0494772	0.503103	-0.476452	0.0374678	-0.288099	0.519395	0.755939	-0.0246579	0.779174	-0.601082	0.502357	0.286891	0.746562	-0.381349	-0.876607
ENSMUSG00000029155	Spata18	D	1.71737	1.59277	2.02913	2.41961	2.13276	2.18308	1.99743	1.68227	2.07198	1.5465	1.16673	1.90636	2.00025	1.98792	1.64183	1.19118	0.540959	-0.417393	-1.53115	0.734581	-0.0395071	-0.337065	-2.49133	0.480157	-2.49133	0.790357	-1.4163	-1.13893	-0.57184	-0.540509	1.00498	0.404765	0.287131	-0.680833	-0.261752	0.658225	0.65334	0.467545	0.43093	0.347281	0.878998	0.00646531	1.72909	0.315944	0.310663	-1.05821	-0.606273
ENSMUSG00000017817	Jph2	D	1.4633	1.93047	1.89628	2.22455	1.78937	2.13384	1.34263	1.96746	1.75738	1.96066	1.79043	1.86105	1.63139	1.91525	1.61888	2.26283	0.900187	0.807058	-0.0727945	0.660464	1.11593	0.915765	0.0751504	1.35241	1.80175	0.268559	0.651668	0.425985	1.20405	1.26462	0.619187	-0.49669	-0.96666	-0.182776	-0.711832	-1.23268	-1.42158	-0.896315	-0.979659	-0.391032	-0.476762	-1.0358	-0.992534	-1.51924	-0.946101	-0.680486	-0.673563
ENSMUSG00000003418	St8sia6	D	2.28545	1.47819	1.88303	0.948285	1.34962	2.19535	1.86649	0.22535	1.87855	1.82361	1.60286	2.20709	2.16639	1.79742	2.16078	2.02379	-0.800171	-1.17525	0.681964	-1.18387	0.584368	0.816214	-1.09088	-2.595	0.336119	0.0264968	-0.0103829	-0.524691	-0.608405	-0.193061	-0.0510991	1.28681	0.273681	1.08242	0.717282	1.05113	0.169806	0.695818	1.07975	0.134664	0.0433485	0.737582	1.49823	0.729397	0.664891	0.857961	-1.3494
ENSMUSG00000039552	Rsph4a	D	1.21742	1.69345	1.83806	1.6629	1.86344	1.58334	1.74597	1.88101	1.91515	1.77221	1.17495	1.96167	1.85261	1.89665	1.84022	1.64673	0.835546	0.62217	1.09019	0.516681	0.6827	0.977026	0.238381	0.371399	0.271406	1.40319	0.920264	0.0887034	0.664255	0.777843	1.04571	-0.142528	-0.221605	0.107837	-0.0579199	0.372397	0.580569	0.408794	0.241206	0.0946674	0.577792	0.326231	0.909703	0.305029	0.327623	-0.149222	-0.948893
ENSMUSG00000083695	Rnf138rt1	D	2.11836	2.08427	2.39778	2.5224	2.78269	2.27004	1.98036	2.11443	2.20097	2.29539	2.17173	2.07645	2.09534	2.07989	2.35038	1.77166	-0.231295	0.0615567	-0.117526	0.340862	-0.0101455	0.548727	0.641364	0.0523577	0.392437	0.308186	0.332737	0.202718	0.0310228	-0.241953	-0.173663	-0.790286	-0.0802172	-0.371897	-0.0870805	-0.923702	0.574017	-0.524861	-1.16352	-0.291614	-0.168572	-0.642228	-0.721882	-1.23774	-0.679085	-0.469598	-1.6324
ENSMUSG00000020218	Wif1	D	1.37554	1.79057	1.97241	1.93816	1.92297	2.30056	1.81063	1.98928	1.98952	1.98956	2.21551	1.415	1.89512	2.06397	1.77281	1.98913	-2.59351	-0.453772	-1.81371	-1.76539	-0.524046	-2.17216	-0.543644	-2.71541	-1.67688	-0.891051	-0.0996401	-1.10407	-0.746052	-1.12885	-0.788213	-0.365571	-1.05034	-1.75743	-0.658745	-1.10143	-1.10191	-0.539324	-0.474048	-0.322976	-1.8558	-0.694085	-0.941754	-1.68546	-1.35001	-0.865643	-1.98282
245440	NA	D	1.80881	2.00764	2.05474	2.2195	1.86186	1.68414	1.83654	1.85503	2.08213	1.89182	2.13748	2.2518	2.06102	1.95754	1.9476	2.19249	0.716598	-0.523438	0.999434	0.291411	0.130602	0.271373	0.708637	0.275934	0.347089	0.528039	0.369143	0.525803	0.323309	0.611751	0.764593	0.284069	-0.181286	-0.0729384	-0.370228	-0.368787	-0.678421	0.468597	-0.811957	-0.17645	-0.227011	-0.396972	-0.912445	-0.0314949	-0.639581	-0.730586	-0.371766
ENSMUSG00000069911	Fam196b	D	2.09289	1.82848	1.99293	1.89429	1.67625	1.72812	2.04825	1.57189	1.9614	2.04526	1.79938	2.18341	1.94211	2.11839	1.76284	2.04187	-0.54633	-0.452584	0.0334557	-0.092945	0.0812515	-0.324049	0.00917705	-0.671161	-0.439863	0.591654	-0.796211	0.343507	-0.717151	-0.916798	-0.372692	-1.53412	-1.58792	-1.99258	-1.70844	-1.44266	-1.72846	-1.06637	-1.93178	-1.39695	-1.53295	-1.83377	-1.47377	-1.59885	-1.95453	-2.29426	-2.22806
ENSMUSG00000055653	Gpc3	D	2.35252	1.82226	2.14945	1.66604	2.0025	2.30464	2.16128	2.21907	1.93401	1.98031	1.69382	1.76604	2.10341	2.10036	1.70717	1.8418	0.191512	0.58056	0.912191	1.04154	0.471851	1.60886	0.273469	0.211775	0.605502	0.850275	0.2369	0.642376	0.44305	0.303252	0.720787	-0.56153	-0.675275	0.208303	0.123264	-0.708687	0.202112	-0.389771	-0.908642	-0.364604	-0.462371	-0.963365	-0.488279	-0.00900523	-1.09896	-0.441306	-1.35864
ENSMUSG00000030307	Slc6a11	D	2.10462	2.05478	2.07883	1.87878	2.25185	1.95937	2.16924	2.20762	2.05301	2.0695	2.06936	1.93827	1.90204	2.00462	1.84327	1.92178	0.0688611	-0.125904	0.230376	0.195071	0.271753	0.337252	0.157735	-0.142272	0.160685	0.563176	-0.244519	0.173537	-0.037021	-0.0396928	0.0727675	-0.431244	-0.541008	-0.502378	-0.336299	-0.576644	-0.34751	-0.530518	-0.563975	-0.34906	-0.582553	-0.685185	-0.344146	-0.460986	-0.521151	-0.489395	-0.577581
ENSMUSG00000045655	Fam216b	D	1.55143	1.50497	2.20648	1.59887	1.89673	1.92074	2.11316	1.75011	1.93733	1.50154	1.19316	1.7087	1.84055	1.66596	1.34108	1.04851	-0.223246	-0.712021	0.283509	-0.291364	0.832785	0.00662469	-2.9173	1.39652	-2.47039	0.981172	-1.40906	-1.25067	-0.0952287	-1.29234	1.07483	-0.110012	0.0531996	0.701449	-0.146202	0.415397	0.756906	0.971292	0.0542065	0.268007	0.75533	-0.000868053	0.800584	0.315278	0.503291	-1.0117	-0.460635
ENSMUSG00000025789	St8sia2	D	2.5783	1.94732	2.26848	2.0039	2.09056	2.6022	2.29339	2.18352	2.24103	2.07382	1.92434	2.16933	2.21461	2.38074	2.3175	2.08418	-0.277421	-0.0596519	0.484529	0.30135	-0.0728752	-0.334987	-0.703361	0.321163	-0.0522693	0.998083	-0.0582085	-0.348366	0.319178	-0.00755804	0.79342	-0.151072	-0.0709703	-0.47501	-0.19816	-0.416756	-0.0412911	-0.672099	-0.265011	-0.687298	-0.36117	-0.630335	0.0656041	-0.842188	-0.681118	-0.793026	-0.810454
ENSMUSG00000067786	Nnat	D	1.74042	1.83934	1.83505	1.43323	2.06199	1.59638	1.90302	1.66177	1.69758	1.72934	1.61568	1.36787	1.58359	1.70136	1.3531	1.40443	1.00934	0.454351	1.01582	0.851688	0.731377	1.29021	0.463941	0.91417	0.712286	1.19015	0.293392	0.640793	0.662788	0.628466	0.720247	-0.0347045	0.0708483	0.513412	0.590036	-0.0528216	0.712034	0.54192	-0.106557	0.476672	0.288929	0.0476495	-0.16325	0.460941	0.188184	0.0447585	-1.6051
ENSMUSG00000002944	Cd36	D	0.564989	1.36568	0.849662	1.35081	1.41	1.0798	1.45114	1.7335	1.76326	1.11971	1.54474	1.86507	1.83694	1.66334	1.42194	1.62773	1.08454	0.873613	1.7258	1.14111	1.3186	1.7027	1.17528	1.51368	0.577875	2.04037	0.760669	0.675659	1.81182	1.47873	0.356541	-0.230335	-0.365701	0.358674	-0.111033	-0.229142	0.195668	0.745689	-0.517115	-0.847815	-0.0502007	-0.77366	-0.340942	0.478308	-1.1115	-0.816614	-1.55437
ENSMUSG00000018604	Tbx3	D	2.6716	2.52155	2.00684	2.6673	1.91705	2.05579	2.48141	2.43459	2.2134	2.30048	2.10866	1.849	2.44867	2.26765	1.83548	2.07059	-0.209863	-0.302774	-0.516133	-0.434419	-0.102354	-0.153247	0.2391	-0.0684941	0.509457	-0.338533	-1.8754	-0.0125588	-1.19899	-0.667775	0.199617	-0.538517	-0.186833	-1.81813	-0.00620999	-0.736001	-0.498198	-0.458265	-0.337533	-0.749391	-0.761963	-0.682424	-0.496126	-0.909582	-0.719866	-0.946128	-0.629147
ENSMUSG00000049571	Cfap46	D	1.73178	2.07398	1.89609	1.62763	1.6685	2.09152	2.11728	1.85828	1.6158	1.78983	1.52146	1.81167	1.98121	1.61224	1.63062	1.51617	0.905313	0.530382	0.637052	0.564212	0.687739	0.931507	-0.58016	0.197476	1.26111	-0.874376	0.463824	0.617799	0.171551	1.03546	1.63767	-0.941689	-0.985523	-0.218553	-1.48019	-0.435123	-0.724507	-0.323255	-0.54404	-0.226763	0.198411	-0.930194	-0.60121	-0.24963	-0.626615	-0.791667	-0.0575605
ENSMUSG00000085584	Rtl9	D	1.76784	1.86945	1.9222	2.31742	1.44609	2.17624	1.52762	2.41625	2.15149	2.10137	2.00771	2.36295	1.96146	2.09995	1.96991	2.26188	0.685228	0.626928	1.23891	-0.240547	0.324745	0.422947	0.0223304	0.955428	0.311981	0.776931	0.714508	0.753216	-0.860054	0.289885	0.124101	-0.619105	-0.44962	-0.417379	-0.270604	-0.519541	-0.99667	-0.988112	-0.976916	-0.41986	-0.438089	-0.735929	-0.226886	-0.67801	-0.936599	-1.49268	-0.607057
ENSMUSG00000032303	Chrna3	D	1.53399	2.04259	2.25283	2.06645	1.76387	1.88887	2.39918	2.02228	1.94738	1.68057	1.55768	2.43796	1.86118	1.86467	1.73943	2.08716	-0.202613	-1.12784	-0.0916922	-0.700942	-0.942746	0.248054	-1.57871	-2.89666	-0.475127	-0.572216	-0.361608	-0.972166	-0.977177	-1.69334	-0.471465	-0.857198	-1.04668	-1.19318	-0.667088	-1.44517	-1.37683	-0.455734	-0.514992	-1.50749	-1.75568	-1.35985	-1.48049	-1.47449	-1.28617	-0.71671	-0.500237
ENSMUSG00000050994	Adgb	D	2.55128	2.01752	1.62451	2.2422	1.65184	2.05014	2.1101	2.06223	2.09821	2.22506	1.6299	2.00607	2.01766	1.89387	1.82502	1.47092	0.513616	-0.729572	0.576239	-0.405047	0.378706	0.488288	-1.61689	-0.582637	-0.969545	0.819809	-0.596238	-0.515469	-0.0620695	0.820672	1.0804	-0.222199	0.257433	0.113409	0.0636201	0.00489043	-0.0571519	0.511695	0.0366554	0.442537	0.256691	-0.189692	-0.087201	0.121651	-0.0576143	-0.88556	-2.01045
19791	NA	D	-0.225823	1.55655	0.93075	-0.531544	0.633678	1.11817	0.0244304	0.157236	0.00191017	-0.22881	-0.714764	1.7527	1.61444	-0.512189	0.065646	0.733886	-1.63556	-0.237099	-0.0573989	-1.32698	-0.407405	-1.38987	-1.89551	-1.18942	-0.0535217	0.629734	-0.615106	1.28455	-0.0183767	0.823727	1.36271	0.345614	-1.22475	-0.494796	0.368956	-0.854441	-0.955184	0.900885	-1.05063	0.541784	-0.871278	-0.435791	0.792256	-1.68737	-0.901939	-0.986637	0.540122
ENSMUSG00000027849	Syt6	D	1.08974	1.35785	1.07442	1.15334	0.962475	1.40467	1.3062	1.12407	1.15699	1.11344	1.28122	1.09748	1.34332	1.31744	1.29555	1.56089	-0.501322	-0.416877	-0.415276	-1.16908	-0.0438611	-0.251901	-0.62273	-0.371082	-0.183236	-0.0447847	-0.176144	-0.420127	-0.972331	-0.930965	-0.751013	-1.31002	-1.67263	-1.16165	-1.58187	-1.6526	-1.54186	-0.977778	-1.64864	-1.37608	-1.69545	-1.86281	-1.72545	-1.41258	-1.4163	-1.78581	0.502245
ENSMUSG00000045761	Togaram2	D	2.0398	1.81418	1.7725	1.65839	1.87265	1.9474	2.13176	1.81447	1.70074	1.88659	1.51046	1.63914	1.69289	1.54202	1.44101	1.0862	1.38489	0.774423	0.956663	0.681488	1.00761	1.06564	0.506355	0.271569	0.467854	1.16594	0.687657	1.24907	0.80227	0.401744	1.24519	-0.62809	-1.20612	-0.171782	-1.11156	-0.47779	-0.379403	-0.877421	-0.682838	-0.621234	-0.0602604	-1.12026	-0.0135649	-0.434825	-0.331735	-0.76389	-1.27713
ENSMUSG00000043388	Tmem130	D	2.09431	2.15214	2.2456	1.95499	2.23795	2.06599	2.0574	1.95962	1.88136	2.07091	1.93401	2.0017	1.88526	1.94157	1.91015	2.02329	0.0931214	0.0810807	0.507683	0.515906	0.342862	0.497124	0.297904	0.18932	0.55539	0.630594	0.571001	0.490956	0.24676	0.374768	0.460213	-0.639898	-0.664904	-0.76521	-0.571971	-0.585578	-0.419161	-0.659775	-0.697484	-0.61107	-0.536362	-0.67749	-0.816909	-0.59053	-0.661653	-0.677546	-0.584887
ENSMUSG00000086228	Ubap1l	D	2.39544	2.13727	1.50995	1.3071	2.13931	1.99363	1.56512	2.18775	1.97729	1.90309	1.72983	1.46975	1.73437	1.54722	1.6225	1.54983	-0.913072	0.1095	-0.295229	-1.05548	-0.367857	0.295589	-0.365446	-0.869484	-0.699697	-0.946019	-0.552561	0.338551	-1.08214	0.328591	-0.120817	-0.785318	-1.24955	-1.97793	-1.51285	-1.65658	-1.49606	-0.628938	-1.53679	-1.13104	-0.808015	-1.23862	-0.421055	-0.825505	-0.698197	-1.30697	-0.772656
100628579	NA	D	-0.437022	1.99124	0.282194	-0.685869	-0.551686	0.267176	0.780725	-0.858185	0.630563	0.00628094	-0.647614	2.53699	2.34242	-0.0508272	0.377424	0.704021	-0.139987	-0.451414	-0.153433	-0.795687	-0.504632	-0.589634	-1.21976	-1.12511	-0.156174	0.505157	-0.582056	0.840394	-0.369613	0.0820093	0.926776	0.0495896	-1.29265	-0.688244	0.128145	-0.89033	-0.93771	0.603986	-0.710299	-0.1149	-0.437903	-0.681516	0.0926785	-1.32126	-1.28681	-1.16286	0.874424
ENSMUSG00000041323	Ak7	D	1.93667	2.25632	2.07581	1.27089	2.26639	1.8603	2.24622	1.59009	2.08535	1.89839	1.34748	1.79659	1.77757	1.75286	1.68387	1.68192	0.268114	-0.29322	-0.862429	-0.0905593	-0.56094	0.0818465	-1.18789	0.0485283	-1.09585	0.141532	-1.76428	-0.79427	-0.867079	-0.793029	-0.1892	0.187787	-0.206383	0.443623	-0.33709	0.41739	0.6818	0.784179	0.374456	0.148269	0.561905	-0.042357	1.25987	0.82579	0.606494	-0.402421	-0.540816
ENSMUSG00000070306	Ccdc153	D	1.28679	1.69659	1.9192	1.26082	2.32562	1.69612	2.03454	2.19256	1.63467	1.71509	1.24461	1.36683	1.41515	1.50365	1.43848	1.27111	0.511734	-0.183226	0.506781	0.476522	0.104997	0.551642	-2.50966	1.77493	-1.88523	1.06103	-0.29679	-0.213447	-0.0600538	-0.0407997	1.23493	-0.118127	-0.282882	0.0840586	-0.12442	0.319301	0.400022	0.659565	0.341263	0.100732	0.683286	-0.205419	0.57384	0.814095	0.546682	-0.736799	-1.13382
ENSMUSG00000020014	Cfap54	D	1.29916	1.18981	1.31587	1.56988	1.09909	1.24026	1.56115	1.52815	1.6603	1.36948	0.95051	1.38389	1.62299	1.29273	1.2859	1.06414	1.50835	0.946788	0.593385	0.607231	0.905106	0.662511	0.397426	0.57135	0.359175	1.4547	1.22951	0.619005	0.591837	1.27543	1.12316	-0.253036	0.077469	-0.14928	0.123129	0.225283	0.333854	0.717718	0.0165459	-0.099659	0.434917	0.157293	0.830561	0.367966	-0.174862	-0.564215	0.0925815
ENSMUSG00000031027	Stk33	D	0.947813	1.7485	1.71334	1.91284	2.64849	1.62329	2.01322	1.58458	2.22079	2.07482	1.87408	2.18859	2.10305	2.16449	1.52976	1.5477	0.493319	0.312735	1.17684	0.899004	-0.202975	-0.223786	-0.105703	0.821363	-0.443415	-1.24844	-1.34696	-0.153973	-0.554199	-0.438322	0.551195	-0.332933	-0.097918	0.103836	0.477509	-0.494581	-0.0157467	-0.521369	-0.273124	-0.10442	-0.271136	0.340203	0.569214	0.201111	-0.105399	0.155945	-0.0847229
ENSMUSG00000043164	Tmem212	D	1.71429	1.80075	2.11485	1.58325	2.17891	1.68582	2.09296	1.48822	1.66226	1.89114	0.883091	1.57865	1.73436	1.43506	1.14838	1.44253	-0.434547	-0.235356	-0.766581	0.617908	1.03622	-0.613067	-1.3497	0.375991	-2.13983	1.30138	-1.22053	-0.702065	0.0218729	-0.568108	0.835125	-0.264359	0.351152	0.227364	-0.473432	0.513484	0.11389	0.940942	0.221883	0.174498	0.326493	0.190488	0.861826	0.807802	0.904958	-0.865301	-1.23272
ENSMUSG00000045471	Hcrt	E	7.79038	7.06822	7.18899	6.78777	7.73489	6.5031	7.63811	7.19058	7.32969	6.67471	7.19835	6.97997	7.13271	7.01176	7.10021	7.597	-0.507263	-0.829252	-1.79851	-2.27541	-1.57126	-1.08225	-1.44072	3.39817	-0.793378	-2.75868	-1.25045	-1.40628	-1.16226	-2.15358	-1.27334	-1.2848	-2.75868	-2.17225	-2.75868	-1.9101	-2.30081	-2.75868	-2.14852	-2.75868	-2.75868	-1.57745	-1.10537	-1.62123	-1.80751	-1.63625	-2.01588
ENSMUSG00000037727	Avp	E	5.79703	5.69563	6.03237	5.99161	6.60362	5.80612	6.59106	6.25801	5.90032	6.33832	6.00737	5.37353	5.50178	5.89818	4.61089	5.35008	-1.49362	2.8277	0.259335	2.53506	1.98193	2.4831	2.88808	2.96609	3.20935	3.74844	0.938989	3.66374	1.83613	-0.821906	2.31612	-0.070117	-2.31039	-2.14856	-2.2314	-3.26174	-1.71829	-0.953417	-2.64768	-2.55563	-2.76337	-2.01435	-4.09149	-2.79595	-2.47384	-3.27753	-2.80529
ENSMUSG00000027301	Oxt	E	6.43394	6.87083	6.84368	6.42209	7.45357	6.44496	7.17265	6.25678	6.54667	6.88306	6.61795	6.55513	5.71536	6.8054	6.2113	5.98709	-2.51811	1.11168	-0.548597	-0.0325748	0.375231	0.702494	0.198693	1.678	0.695464	1.46906	-2.02841	1.61248	0.746408	-0.235296	0.977804	0.138846	-3.12997	-2.21208	-3.28059	-3.05084	-1.08189	-3.20255	-1.39202	-2.5573	-3.53664	-1.21058	-1.67972	-3.53664	-3.53664	-1.90779	-1.74204
ENSMUSG00000035383	Pmch	E	6.52493	6.51795	6.57968	6.78633	6.06911	6.67554	6.42456	6.46912	7.0612	6.26456	7.04913	7.20081	7.01854	6.99385	7.14346	7.59074	-1.22183	-2.66	-0.843832	-1.08007	-0.485923	-1.70298	1.86504	2.13837	-0.566421	1.01699	0.794294	-0.240623	-0.122258	-1.82681	-2.66	-1.07509	-1.26598	-2.66	-2.66	-2.31869	-2.20213	-2.66	-1.29304	-2.25525	-2.66	-1.95173	-2.66	-1.056	-2.66	-1.72225	-2.125
ENSMUSG00000054667	Irs4	E	5.57541	5.54723	5.71227	5.61578	5.59878	5.66597	5.65895	5.79381	5.80662	5.62162	5.71456	5.62585	5.8771	5.87248	5.56769	5.61298	1.85972	0.954645	2.34226	1.98079	1.92403	2.94662	1.96349	1.53599	1.74013	2.57744	2.09202	2.28833	0.983104	2.30297	2.60512	-1.64591	-3.03777	-2.17343	-2.78236	-3.27552	-1.98402	-2.01921	-3.76132	-1.38	-2.8323	-2.7212	-3.76132	-1.34998	-3.3036	-2.55473	-1.79115
ENSMUSG00000005892	Trh	E	3.85938	3.97638	4.57872	4.29657	4.56575	4.35375	4.17736	3.64168	3.80895	3.74417	3.84396	4.25422	3.7976	4.18642	3.97329	3.836	3.2272	-0.250615	2.6584	1.23917	0.311894	2.32937	1.22187	2.11033	0.746421	1.67126	0.13975	0.992598	1.11376	1.64323	1.65593	-1.69567	-3.40556	-3.33058	-3.52399	-3.36473	-3.41852	-3.89777	-3.29128	-3.30418	-3.01342	-4.50295	-2.09938	-2.73748	-3.55178	-2.81434	-1.5517
ENSMUSG00000047507	Baiap3	E	4.93053	4.94664	4.63307	4.65603	4.84751	4.71088	4.64449	4.55113	4.45701	4.60691	4.43725	4.46262	4.44034	4.47612	4.32467	4.3692	2.23548	1.70096	2.85335	2.55754	2.54617	3.14546	2.31321	1.98757	3.0115	2.88331	2.59244	2.88691	1.99988	2.73052	3.01865	-1.96324	-2.53644	-1.56173	-1.57324	-2.28262	-1.1979	-1.38122	-2.4868	-1.71203	-2.5129	-2.56326	-1.80788	-1.43839	-2.20629	-1.76877	-3.01367
ENSMUSG00000036198	Arhgap36	E	4.79418	4.8543	4.88187	5.02502	4.69584	4.76337	4.98084	4.75648	4.66386	4.81533	4.78245	4.7522	4.86739	4.98117	4.64064	4.6993	1.19685	1.48441	2.19667	2.28062	2.13748	2.37619	1.85489	0.909989	1.93339	2.28505	2.13058	1.92846	0.58773	1.81709	1.83552	-1.19086	-1.53008	-1.3828	-2.35122	-1.76398	-0.717089	-0.711083	-2.71999	-1.61863	-1.7033	-1.25362	-1.44433	-1.49249	-2.66462	-2.88036	-3.16256
ENSMUSG00000040856	Dlk1	E	4.7225	4.80322	4.74975	4.60782	4.90183	4.68865	4.85865	4.62156	4.663	4.64739	4.68905	4.56188	4.66992	4.6761	4.51086	4.64006	1.79419	0.876814	1.52328	1.33248	1.15957	1.95947	1.4647	1.21382	1.46599	1.71463	1.11093	1.59219	0.855309	1.53624	1.74004	-0.886601	-0.921796	0.0486204	0.328136	-1.04956	0.548412	0.210541	-1.57969	-0.188237	-0.873554	-1.55909	-0.852897	0.309303	-1.44214	-0.130121	-3.09484
ENSMUSG00000038112	AW551984	E	4.32428	4.38098	4.55529	4.48385	4.25818	4.52275	4.50134	4.41669	4.41366	4.44219	4.48458	4.7038	4.55721	4.58269	4.48735	4.6075	1.59894	1.31035	2.23868	1.83546	2.08581	2.42957	1.88891	0.924715	1.88058	2.43086	1.96665	1.91132	1.43379	1.91491	2.12343	-1.46373	-1.88403	-0.66711	-0.222508	-1.59417	-0.531186	-0.719578	-1.3999	-1.33038	-1.73762	-1.41524	-1.94217	-0.329586	-1.88449	-1.26696	-1.92172
ENSMUSG00000023964	Calcr	E	4.58165	4.6268	4.93271	4.61129	4.33813	4.62469	4.75619	4.04996	4.53878	4.43133	4.59394	4.63852	4.63189	4.81829	4.6627	4.80971	2.18872	0.635154	1.94541	1.78346	1.63745	2.9276	0.767388	0.977213	2.34205	2.7339	1.37625	1.57521	1.50195	1.72166	2.98489	-1.12779	-2.60166	-2.27886	-2.60166	-2.60166	-2.60166	-2.60166	-2.26457	-2.60166	-2.22168	-2.32513	-2.29319	-2.60166	-2.60166	-2.60166	-2.60166
ENSMUSG00000021647	Cartpt	E	3.9609	3.97029	4.05417	3.79051	3.82603	3.78621	3.71632	3.73881	3.85963	3.99205	3.6694	3.5192	3.73573	3.62385	3.65866	3.85952	1.29316	1.46184	1.98003	1.94804	1.80924	2.17745	1.49521	1.34371	1.76303	2.48922	1.56485	1.97586	1.22048	2.0318	2.41812	-1.94965	-2.16744	-1.66885	-1.14067	-1.71908	-1.40633	-0.913437	-1.17931	-0.966287	-1.0957	-1.21867	-1.6929	-1.42916	-1.88859	-1.63558	-0.0692224
ENSMUSG00000031344	Gabrq	E	4.70161	4.75934	5.04765	5.04283	4.8209	4.78865	4.83532	4.67982	4.73431	4.75988	4.60593	4.89864	4.84425	4.87974	4.6877	4.91488	-0.257372	0.812792	1.56666	1.78861	1.04767	1.96852	1.75069	-1.15834	1.71271	1.42741	1.60611	1.49903	0.928054	1.35351	1.42321	-1.62445	-1.40065	-2.11598	-2.44636	-1.75069	-0.848576	-2.09724	-1.66478	-1.72307	-2.02195	-1.66229	-2.70241	-2.02438	-1.75124	-0.956419	-1.33991
ENSMUSG00000062393	Dgkk	E	4.34808	4.62277	4.58187	4.94693	4.44007	4.57365	4.76849	4.74155	4.85787	4.74802	4.72757	4.8541	4.75892	4.95739	4.65422	4.88203	0.570041	1.02161	1.47841	0.44897	1.76896	0.942474	1.68324	0.830474	1.5862	2.4502	1.10266	1.21756	0.545608	1.03541	0.802637	-1.02776	-1.90538	-0.666757	-1.42943	-1.04443	-0.766254	-1.12892	-1.49846	-1.32975	-1.87535	-1.68107	-1.41298	-1.4366	-1.52762	-1.78596	-1.99508
ENSMUSG00000038805	Six3	E	4.05212	4.18342	4.04549	3.97331	4.39245	3.83897	4.10763	3.8531	3.82269	3.86191	3.88603	3.94508	3.91336	4.07523	3.87491	3.5501	1.92803	2.38048	2.1346	1.69682	2.57647	2.48667	2.07299	1.3361	3.17476	3.31148	1.97003	2.00873	2.12742	2.30604	2.05124	-0.714416	-2.75129	-1.43717	-1.26614	-1.04058	-0.348852	-0.163967	-2.39883	-2.63116	-1.60573	-2.18276	1.28894	-0.828183	-1.2062	-1.86451	-2.86771
ENSMUSG00000001496	Nkx2-1	E	5.17021	4.87466	4.63439	4.60804	4.74893	4.72892	4.73154	4.98901	4.81254	4.64846	4.40293	4.45317	5.00303	4.73755	4.55399	4.78097	1.01815	0.45773	1.37742	-0.0903987	0.927181	0.975545	0.652722	-0.443614	0.98221	2.25725	1.19239	1.41011	1.36589	1.03919	0.567896	-0.841921	-1.61894	-0.542987	-0.748008	-0.691497	-1.01985	0.546591	-1.6787	-1.00836	-1.57535	-1.07811	0.267973	-0.67376	-1.10583	-1.35484	-2.71633
ENSMUSG00000056972	Magel2	E	4.45468	4.38515	4.13056	4.28482	4.35992	4.47211	4.4457	4.14191	4.24773	4.35704	4.03143	4.14918	4.47745	4.19862	4.02346	4.05638	1.22379	0.884183	2.01047	1.77416	1.79106	2.32695	1.62956	1.27916	1.88697	2.26688	1.38549	2.00177	1.50868	1.86978	1.94515	-1.35353	-1.19191	-1.20136	-0.588267	-1.52604	-0.685006	-0.837978	-2.49734	-1.17088	-1.95176	-1.55066	-0.697766	-0.373929	-1.16768	-1.49369	-2.36456
ENSMUSG00000028023	Pitx2	E	5.51277	5.03683	5.13305	4.77132	5.01998	4.88975	5.14959	5.55555	5.4257	5.29044	5.31373	5.00369	5.31016	5.28509	5.129	5.42184	-1.55954	-1.55954	-1.55954	-0.714902	-1.55954	-1.55954	-1.10192	-1.55954	-0.0661075	-1.55954	-0.484514	0.107077	-0.550944	-1.55954	-1.55954	-0.822612	-1.55954	-1.55954	-1.55954	-1.55954	-0.754641	-1.55954	-1.55954	-1.55954	-1.55954	-1.05105	-1.55954	-1.55954	-1.3126	-1.55954	-1.55954
ENSMUSG00000026247	Ecel1	E	4.05893	4.20078	4.03978	3.69443	4.12995	3.99232	4.01474	3.98581	3.77963	3.93967	3.86847	3.64102	3.85648	3.61479	3.48255	3.66854	1.96545	1.44133	2.69009	1.79177	1.91927	2.54361	1.86245	1.54739	2.48934	2.52826	2.27845	2.2275	1.84213	2.29487	2.03374	-1.89976	-1.82206	-1.1687	-1.51871	-1.44054	-1.09952	-1.30641	-2.15481	-1.16483	-1.39466	-1.57428	-1.73547	-0.7573	-1.81524	-1.16842	-1.68601
ENSMUSG00000019913	Sim1	E	4.0177	4.0512	4.28026	4.58547	4.33462	3.98188	4.15567	4.60966	4.61182	4.17218	4.37969	4.72547	4.56557	4.96458	4.53695	4.60984	-2.11554	2.30843	-0.0618027	1.99835	3.18177	0.808376	2.72355	0.639019	2.0597	1.82784	2.02208	1.98501	0.706523	0.743025	1.72946	-1.58505	-2.11554	-0.943177	-2.11554	-2.11554	-1.65767	-2.11554	-1.77845	-2.11554	-2.11554	-2.11554	-2.11554	-2.11554	-1.8686	-2.11554	-2.11554
ENSMUSG00000021685	Otp	E	5.31166	4.76644	4.50394	4.05664	4.99858	4.74981	4.94105	4.42979	4.41095	4.58672	4.40151	4.41794	4.3697	4.64692	4.40437	4.21472	0.679262	-0.949035	1.74256	0.626978	0.275971	1.49369	0.364934	1.9643	1.64926	2.79517	0.140272	1.55418	0.0942038	1.17363	1.70336	-1.79959	-2.08908	-2.08908	-2.08908	-2.08908	-1.84205	-1.05886	-2.08908	-2.08908	-1.40861	-2.08908	-2.08908	-1.41104	-2.08908	-1.91174	-2.08908
ENSMUSG00000059246	Foxb1	E	5.56716	4.46766	4.91034	5.09916	4.36587	4.78454	4.43016	5.53991	5.11366	4.90526	4.6163	4.75137	5.07192	4.98412	4.96091	5.03275	0.260323	-0.743534	-1.88358	-1.88358	-1.88358	0.051462	-1.88358	-1.88358	-1.43667	0.799804	-0.575745	-0.0822623	0.0359112	-0.525608	0.146913	-1.88358	-1.88358	-1.88358	-1.88358	-1.88358	-1.88358	-1.88358	-1.88358	-1.88358	-1.88358	-1.88358	-0.917458	-1.72009	-1.88358	-1.88358	-1.88358
ENSMUSG00000031340	Gabre	E	4.6121	4.75741	4.65202	4.90049	4.66059	4.50727	4.66736	4.76847	4.63356	4.62874	4.51807	4.42403	4.47623	4.68339	4.42208	4.38095	1.27433	-0.270502	0.393956	0.881472	0.34019	1.34744	0.204655	-0.442412	1.22767	1.80469	1.20385	1.56055	0.477631	0.752441	1.39344	-1.26648	-1.77064	-1.75801	-1.871	-1.85864	-1.88656	-0.602323	-2.34444	-2.34444	-1.96445	-2.0679	-0.309121	-0.988352	-1.88671	-1.73736	-2.34444
ENSMUSG00000029697	Fezf1	E	4.63713	4.64547	4.45074	4.94281	4.48522	4.80421	4.70441	4.13346	4.12582	4.49925	4.26469	4.42957	4.39786	4.47881	4.37954	4.45298	-2.16398	0.803553	1.81911	1.8108	1.00339	1.34118	0.474314	0.335176	1.45152	0.621617	0.623196	2.0129	1.43671	1.53478	1.62846	-1.42704	-2.16398	-2.16398	-1.69054	-0.940837	-1.91695	-2.16398	-1.82688	-1.75923	-1.023	-1.65548	-1.60151	-1.19317	-1.70625	-1.68643	-2.16398
ENSMUSG00000042258	Isl1	E	4.72393	4.73588	4.554	5.12255	4.50796	4.87078	4.74286	4.56049	4.56541	4.46294	4.51494	4.4904	4.81187	4.80805	4.45878	4.84008	-1.35732	0.702204	-0.0553974	-0.188705	1.05822	2.05623	0.0150344	-1.76007	1.22399	2.25348	0.12021	0.802382	-0.776896	-0.258981	0.926369	-0.886794	-1.89152	-2.10914	-1.85308	-1.06116	-1.65127	-2.10914	-2.10914	-2.10914	-1.42867	-2.10914	-0.97691	-2.10914	-1.46753	-2.10914	-2.10914
ENSMUSG00000031212	Pgr15l	E	4.22443	4.33456	4.59374	4.86959	3.93978	4.56665	4.54391	4.39711	4.4403	4.1952	4.51114	4.72993	4.7189	4.73924	4.54161	5.19723	-2.01172	-0.630344	1.28475	1.15149	-0.317718	1.45301	0.626571	-1.3818	1.15638	0.958846	1.17673	1.31158	-0.0922329	0.623058	1.57998	-0.933761	-2.01172	-1.42529	-1.53828	-0.873503	-1.7647	-2.01172	-2.01172	-1.60697	-0.522195	-1.30345	-1.23336	-1.22935	-1.76478	-0.889293	-1.47672
ENSMUSG00000042607	Asb4	E	4.23672	4.41672	4.52748	4.76014	4.0275	4.50077	4.53484	4.64868	4.64451	4.65026	4.49989	4.65873	4.72704	4.6679	4.44721	4.73559	-0.233956	-0.785415	-0.124513	-0.0994098	-1.94858	-0.0346858	-0.776226	0.797705	0.00781199	0.269587	-1.81709	-0.992257	-0.140139	-0.519527	-0.160098	-3.03583	-1.76278	-2.15295	-1.58958	-1.39835	-1.80549	-1.47499	-2.28769	-1.13551	-1.02746	-1.6871	-0.256609	-1.28275	-1.26399	-2.59939	-1.73065
ENSMUSG00000021032	Ngb	E	3.40065	3.55001	3.60134	3.26282	3.7975	3.46047	3.61761	3.22601	3.27018	3.55798	3.46135	3.41014	3.34558	3.36936	3.16513	3.43097	2.30541	1.36029	2.44878	2.33502	2.10798	2.54127	1.47253	1.58895	1.47763	2.55581	1.84855	2.16465	1.67574	2.09053	2.43295	-1.6717	-2.23917	-1.23461	-1.54344	-1.87431	-1.62161	-0.532276	-2.52942	-1.01134	-1.71955	-2.36031	-1.72436	-0.94401	-1.64991	-1.62375	-1.19723
100043902	NA	E	3.42469	3.40421	3.49025	3.47516	3.64072	3.08455	3.57962	3.12312	3.20098	3.3309	3.16807	3.42907	3.48793	3.40726	3.23161	3.17373	1.69322	2.16571	2.0859	1.6756	2.84637	2.24597	2.1336	2.5288	2.04367	2.71002	1.66643	2.0804	1.57702	2.07464	2.06838	-0.543738	-2.29181	-0.955487	-1.12986	-0.431575	0.0120946	0.23149	-1.65393	-2.8656	-0.973424	-1.04373	1.15741	-0.954939	-0.56681	-2.8656	-2.8656
ENSMUSG00000021609	Slc6a3	E	2.07163	4.20672	2.23232	4.89054	1.77682	3.52407	5.95839	3.73489	5.67745	3.35805	5.40344	4.22178	5.18113	5.68398	4.86271	3.72847	0.743541	-2.07579	-0.0445887	-1.71791	-2.56255	-0.131541	0.314367	-0.558548	0.419164	-1.79073	-1.48752	-0.419355	-0.156333	-0.820605	-1.96396	-1.82562	-1.08181	-1.56035	-2.56255	-1.71397	-1.92075	-1.35909	-1.72288	-1.17337	-2.56255	-1.02573	-1.28138	-1.27573	-1.04307	1.05194	-2.02755
ENSMUSG00000036357	Gpr101	E	3.17438	3.2391	3.39499	3.32462	3.21121	3.36734	3.41513	3.11678	3.39249	3.29909	3.14425	3.48883	3.36185	3.54003	3.37227	3.54741	1.9702	1.27562	2.32956	1.95414	1.76757	2.44876	1.54831	0.633784	1.17861	2.24234	1.20628	1.88085	1.32761	1.80906	2.2616	-0.67069	-0.215745	0.400543	0.949906	-0.114531	0.903502	0.298334	-0.198797	0.369091	-0.255599	-0.37275	-0.724406	0.894891	-0.890745	-0.129435	-3.13216
ENSMUSG00000026751	Nr5a1	E	5.11422	4.55	4.58263	5.15794	4.31112	5.06348	4.91133	3.62749	4.03501	4.63284	4.69485	4.47353	4.84519	4.5136	4.29789	4.37307	-1.44371	-1.44371	-1.44371	-1.44371	-1.44371	-1.44371	-1.44371	0.655537	-1.44371	-1.44371	-1.44371	-1.44371	-1.11833	-0.0857391	0.168388	-0.365748	-1.22609	-1.44371	-1.44371	-1.44371	-1.44371	-0.240245	-1.44371	-1.44371	-1.06372	-1.44371	-0.881244	-1.44371	-1.44371	-1.44371	-1.44371
ENSMUSG00000091705	H2-Q2	E	4.48427	4.36139	3.77348	4.18302	3.99089	3.93755	4.0775	3.68452	3.57178	3.7992	3.66311	3.91361	3.79237	3.78011	3.69131	3.53513	2.1651	-0.582414	0.74711	1.34223	-0.397316	1.8879	0.450442	0.763906	0.164916	1.40342	1.36844	1.1005	1.05661	1.22682	1.07778	-1.6143	-1.62768	-1.76481	-2.35123	-1.12809	-1.89336	-1.74606	-1.13956	-1.94649	-1.97125	-1.17001	-0.697923	-2.04091	-2.10429	-2.35123	-1.26556
ENSMUSG00000031255	Sytl4	E	3.8776	4.03053	4.32831	3.813	3.97014	4.01983	4.48986	4.0762	4.05416	4.05392	4.25198	4.1897	4.27633	4.19724	3.98261	4.2849	0.0777136	0.228251	0.561788	0.407227	0.642083	0.169786	0.290026	-2.79668	-0.583401	0.413877	-1.0013	0.0413978	-0.0403035	-0.383189	0.364554	-0.925062	-0.350113	0.140529	-0.668754	-0.474676	-0.298977	-0.026682	-0.844468	-0.486206	-0.124343	-0.947162	-0.371615	0.0470518	-0.520507	-0.519407	-2.38034
100504399	NA	E	4.30562	4.45631	3.59081	4.00821	4.36359	4.00183	4.38285	4.55634	4.5115	4.28918	4.33263	4.1437	4.42562	4.38095	4.18659	4.53195	-1.99526	-0.407199	-1.99526	-0.415336	-1.59542	-1.99526	-1.99526	1.07356	-1.99526	-1.03681	-0.920233	-0.830036	-1.18053	-1.99526	-1.17041	-1.46477	-1.99526	-1.40884	-1.16596	-1.81454	-0.789058	-1.16197	-1.99526	-1.59052	-1.99526	-1.99526	-1.99526	-0.179758	-1.35366	-1.99526	-1.7031
ENSMUSG00000021099	Six6	E	4.42914	4.45321	4.04784	4.43049	3.63088	4.39582	4.40997	4.2546	4.33077	4.52509	4.15673	4.63321	4.94278	4.72305	4.41973	3.90936	-1.32187	-1.32187	-1.32187	-1.32187	-1.32187	-1.32187	-1.32187	1.59836	-1.32187	-1.32187	-0.246843	-1.32187	-0.9965	-1.32187	-1.32187	-1.03238	-1.32187	-1.32187	-0.342916	-0.980562	-1.32187	-0.118412	-1.32187	-1.32187	-1.32187	-1.32187	-0.543512	-1.15839	-1.32187	-1.32187	-1.32187
ENSMUSG00000024907	Gal	E	4.0815	4.42903	4.639	3.90679	4.70488	4.20854	4.49312	3.94061	3.77851	4.17914	4.13131	3.88858	4.00558	4.04973	3.77058	3.82379	-2.95747	-0.520721	0.384551	0.140188	-0.68475	0.0810677	-1.26162	-0.858228	-0.189841	-0.503202	-0.422416	0.0685232	-1.4871	-1.10731	0.364338	-1.48359	-1.10748	-0.494444	-1.71902	-1.90949	-1.5348	-1.92725	-2.1178	-2.237	-2.57749	-1.1356	-1.99135	-1.67065	-1.87332	-1.92443	-2.66531
ENSMUSG00000020660	Pomc	E	3.87103	4.22586	3.4897	4.02681	4.23192	3.657	4.42204	4.14611	4.10745	4.26502	3.92674	3.59765	4.21388	3.75557	3.93254	3.83419	-0.945122	-2.00133	0.358432	-0.744619	-1.98626	1.12986	-0.874296	1.14937	-0.292127	-1.30359	-1.57579	-1.41209	-1.2529	-0.654999	-2.08366	-1.23304	-0.425389	-2.34726	-1.84129	-1.54943	-0.742928	1.55151	-1.85287	-1.35935	-1.62527	-2.11202	-2.03452	-1.76009	-1.88869	-1.57454	-1.44556
ENSMUSG00000031111	Igsf1	E	3.67771	3.68986	3.65988	3.65034	3.69095	3.61145	3.79407	3.84928	3.66377	3.60155	3.73802	3.48506	3.65048	3.62149	3.49278	3.50442	0.85994	-0.0344128	1.18405	0.944162	1.09341	1.44962	1.17787	0.750189	1.14841	1.73544	0.885668	0.817314	0.442452	0.747416	1.33866	-0.563864	-0.735134	-0.645672	-0.565481	-0.528962	-0.463208	-0.391714	-0.316574	-0.564717	-1.02664	-0.556674	0.294525	-0.327039	-0.71996	-0.771128	-2.61754
ENSMUSG00000056380	Gpr50	E	4.07736	4.27528	4.30489	3.91692	4.2671	4.0473	4.45746	4.00319	3.83711	4.20465	3.33444	3.51863	3.83126	3.5853	3.61733	3.52011	0.753562	-0.349296	-0.0210571	0.750265	0.0863239	-0.467205	1.60991	0.533203	-0.0673446	0.647775	-0.970894	0.952115	-1.09925	0.579844	0.340075	-1.54179	-1.55517	0.0467198	-2.02267	-1.14051	-0.960229	-1.24851	-1.43906	-1.29938	-1.3497	-2.00219	0.124842	-1.06465	-0.856388	-2.10139	-2.27872
ENSMUSG00000054160	Nkx2-4	E	4.22128	4.9238	4.61672	3.18847	4.59333	4.40558	4.48953	4.27779	3.95033	4.06578	4.18664	3.82067	4.18806	4.32056	4.09408	3.83413	-1.10126	-1.10126	-1.10126	-1.10126	-1.10126	-1.10126	-1.10126	-1.10126	-1.10126	-1.10126	-1.10126	-1.10126	-1.10126	-1.10126	-1.10126	-1.10126	-1.10126	-1.10126	-1.10126	-1.10126	-1.10126	-1.10126	-1.10126	-1.10126	-1.10126	-1.10126	-1.10126	-1.10126	-1.10126	-1.10126	-1.10126
104798	NA	E	3.83606	4.00774	3.62094	4.53612	3.65763	4.0882	3.59557	4.5299	4.18234	4.14932	3.50602	4.09112	3.97535	3.81615	4.18868	4.29101	-1.58684	0.00122381	1.08175	-1.10357	-0.399424	-1.58684	-1.58684	0.84071	-0.093404	0.737607	-0.0786091	-0.889651	-0.254599	-0.753652	-0.566444	-0.233254	-0.863288	-1.26403	-1.58684	-1.24553	-1.58684	0.546585	-1.58684	-1.18209	-0.906377	-0.878569	-0.170672	-0.0409366	-0.635671	-1.58684	-1.58684
ENSMUSG00000022860	Chodl	E	3.1275	3.03562	3.39934	3.17332	3.13693	3.22699	2.9579	2.86112	3.33787	3.17378	3.0882	3.51047	3.52394	3.61322	3.59074	3.44461	1.51047	1.31067	1.85746	1.66552	1.16506	2.22749	1.63058	-0.742816	0.868676	1.513	1.58832	1.50255	0.438362	1.53846	0.962981	-1.66886	-1.7636	-2.16039	-1.50836	-2.12969	-1.94191	-0.795821	-1.53514	-1.35764	-1.60584	-2.47028	-2.74682	-1.53275	-2.49988	-1.24546	-0.696277
ENSMUSG00000031789	Cngb1	E	3.38907	4.16532	3.76503	4.29089	3.74901	4.15714	3.93206	3.93183	4.02102	4.01146	3.55607	3.97671	3.9189	3.79317	3.7798	3.56446	-2.45177	-1.07039	0.646574	0.0780304	-1.07503	-0.40296	-1.64725	0.569206	-0.486468	0.23161	0.410519	-0.785149	0.0217085	-0.709825	0.906668	-1.09818	-0.97103	-0.0558948	-1.0992	-0.475042	-1.13327	-1.84659	-1.41414	-1.47242	-1.12602	-0.718805	0.0762721	-0.250212	-0.674847	0.125986	-2.45177
ENSMUSG00000029193	Cckar	E	3.28209	4.08738	3.85835	3.95293	4.0161	3.9002	3.73114	4.13458	3.9247	3.93348	4.09837	3.67468	3.58374	3.8564	3.78671	3.78169	-1.54026	-0.690193	0.977702	0.219945	0.153743	0.394779	-0.222303	-1.54026	0.128182	0.207379	-0.0320268	1.53974	0.172076	-0.182291	0.88494	-1.25077	-1.54026	-1.54026	-1.54026	-1.54026	-1.29323	-1.54026	-1.54026	-1.54026	-1.54026	-1.26372	0.796796	-1.54026	-1.29332	-1.54026	-1.54026
ENSMUSG00000018822	Sfrp5	E	3.84177	3.58763	3.34017	3.41734	3.71666	2.99923	3.70915	3.22981	3.27344	3.74183	3.36288	3.11601	3.00786	3.06433	3.07226	3.62979	-1.5361	0.491955	0.712602	0.600881	0.785795	-1.14469	-0.095412	0.246487	1.42451	1.60815	0.838671	0.69311	0.444827	0.214736	1.67098	-1.94537	-1.90493	-2.48972	-1.6499	-1.77873	0.644057	-2.69378	-2.45929	-3.29896	-1.66237	-2.25883	-0.358782	-0.855429	-1.77947	-1.86584	-1.60086
ENSMUSG00000018339	Gpx3	E	3.62634	3.56098	3.67885	3.55404	3.56625	3.39534	3.55297	3.50988	3.50267	3.55913	3.49306	3.32203	3.49279	3.45904	3.29111	3.49325	0.125955	0.234169	0.826456	0.617727	0.75859	1.32747	0.404325	0.621076	1.18159	1.24378	0.596278	0.930346	0.298789	0.730241	1.08448	-1.60026	-1.96941	-1.75893	-1.9053	-1.91184	-1.35471	-1.58353	-1.69247	-1.83329	-1.79031	-2.1251	-1.20242	-1.43006	-2.00668	-2.12323	-1.61561
ENSMUSG00000026354	Lct	F	-1.58049	-1.8644	-2.62349	-1.11063	-1.76158	-3.12745	-3.12745	-1.14698	-2.61829	-3.12745	-2.01484	-2.64041	-2.40378	-2.32752	-2.41691	-2.6964	-0.511724	0.109366	-1.31128	-0.597651	-0.51633	-1.19241	-0.775231	-0.260354	-1.83321	-0.872576	0.592218	-1.32614	-0.357942	0.352949	-1.64211	5.03178	5.02377	4.76871	4.68334	5.21992	4.83479	4.53754	5.52692	4.98591	4.98008	5.29667	4.96156	4.22118	5.30873	5.13059	-0.176205
ENSMUSG00000054889	Dsp	F	-0.149423	-0.200611	-0.0928287	-1.75234	-0.817297	-0.280362	0.702606	0.418758	-0.809716	0.316254	-0.113165	-0.664377	-0.313724	0.0854308	-0.158111	-0.501485	-1.20531	-1.62736	-1.29912	-0.330875	-2.36937	-1.62175	-1.86093	-0.86196	-0.714206	-1.30191	-2.48175	-0.530789	-0.957515	-1.81484	-2.73193	4.92919	4.8635	4.93141	4.5719	5.26916	4.80656	4.31816	5.43921	4.87476	4.63494	5.27174	4.72247	4.35745	5.11293	4.90872	-2.19428
ENSMUSG00000036907	C1ql2	F	1.59727	1.44871	1.30307	1.18081	1.60206	1.54746	1.51365	1.5757	0.885211	1.26594	1.34614	1.11461	1.02175	1.07779	0.872204	1.0145	0.544884	-1.34417	-0.243593	-0.749965	-1.13418	-0.537042	-0.204857	-0.841263	-0.744727	-0.0571005	-1.68079	-0.189079	-0.692463	-0.405374	-0.792818	3.8303	3.89236	3.77994	3.65044	3.76286	3.55225	3.37886	4.08247	3.88768	3.85825	4.04566	3.49694	3.21496	4.0525	3.84115	-1.25805
ENSMUSG00000026065	Slc9a4	F	-2.66055	-2.66055	-2.66055	-2.66055	-2.66055	-2.66055	-2.66055	-2.66055	-2.66055	-2.66055	-1.99954	-2.66055	-2.66055	-2.20583	-2.66055	-2.66055	0.594783	0.513513	1.2935	0.29634	-0.592353	0.202458	0.42107	-2.66055	0.182031	-0.555769	0.887736	0.309346	-0.0612785	1.06687	0.281518	3.12655	3.87337	3.91745	4.08926	3.71114	4.02291	4.00229	3.82653	3.82187	3.58223	3.84735	3.4715	3.83185	3.87048	3.80492	-1.73615
ENSMUSG00000050074	Spink8	F	-1.85874	-1.54297	-1.43842	-2.96523	-1.28344	-0.941303	-1.9724	-2.25918	-0.764409	-1.09358	-1.1111	-1.3765	-0.577312	-1.45298	-1.27482	-0.592657	0.943601	0.208834	1.67596	-0.00833883	0.976938	0.69119	1.02856	0.799451	0.562147	0.933243	1.44693	0.998394	0.298056	0.612828	0.53108	3.79993	3.58382	3.44851	3.64242	3.7649	3.74935	3.33222	3.85659	3.69863	3.81324	3.98612	3.70495	3.83273	3.78679	3.93877	-0.838555
ENSMUSG00000026322	Htr4	F	1.43563	1.2883	1.42553	1.4572	0.693527	1.68568	0.75505	0.61521	1.45271	1.55547	1.22997	1.36933	1.07902	1.27772	1.55457	1.48165	0.696477	0.603743	1.22344	0.484052	0.226176	0.785397	0.606118	-2.38683	-0.228509	0.788209	-0.324891	0.451248	0.732387	0.0266609	0.671881	2.3621	2.79833	2.85894	2.60883	2.68642	2.57817	2.52992	2.73846	2.80897	2.30205	2.86473	2.43301	2.54346	2.81271	2.66321	-1.48357
ENSMUSG00000007888	Crlf1	F	-0.0525161	-1.34349	-1.47017	-3.36928	-0.791344	-2.38093	-0.150237	-1.17601	-1.11827	-0.737491	-0.726691	-1.51598	-1.24702	-1.09276	-1.552	-1.55782	0.0490478	0.150202	-0.472598	0.518741	0.0618962	-0.431395	0.547813	0.207227	0.810925	0.243306	-0.655344	0.025024	0.753779	-0.459322	-0.225722	3.33076	3.27237	3.50634	3.26049	3.47894	3.16636	3.13168	3.44185	3.29558	3.35576	3.69295	3.15833	3.00253	3.68696	3.74915	-1.45418
ENSMUSG00000039358	Drd5	F	0.102868	0.30852	1.34601	0.0698391	1.13002	0.508014	-0.20491	0.139185	0.845974	0.370895	0.384461	0.140551	0.19204	0.190526	1.15855	0.754487	-1.2998	-1.88246	-1.13332	-0.365283	-0.337726	-0.315114	-1.10219	-2.78638	-0.0357856	0.200827	-0.943349	-1.50809	-0.936315	-0.170878	-1.29685	2.87394	2.99007	2.71938	2.82092	3.20883	2.92896	2.72068	3.15026	3.05794	2.8723	3.17939	2.86584	2.98728	2.97552	2.97754	-0.700033
ENSMUSG00000019230	Lhx9	F	-0.384651	0.851696	0.571807	0.800083	0.998072	0.261608	0.299155	-1.1879	0.193649	0.816543	0.66661	0.927827	0.342646	0.139238	0.702589	0.915379	0.249591	-0.329052	1.39716	1.1216	-0.0581872	1.80174	1.05412	0.250443	0.0725288	1.08722	0.92884	0.958333	0.412457	0.873822	1.09945	1.92166	2.5206	2.78347	2.79806	2.50594	2.6127	2.53098	2.49159	2.60595	1.66929	2.5224	2.49125	2.52283	2.57238	2.39541	-2.14276
ENSMUSG00000050122	Vwa3b	F	0.593609	0.309376	0.275821	0.058208	0.880149	-0.0449727	0.732939	0.467528	0.763369	0.797247	-0.0637097	0.500008	0.26851	0.274889	-0.16042	0.169114	0.145552	-1.23111	-0.010055	-0.444483	-0.708718	0.262596	-0.917841	-0.293442	-1.33605	0.28624	-2.36324	-0.659717	-0.622795	0.215117	-0.959008	2.93858	3.21265	2.94708	2.66075	2.96315	2.47048	2.53472	3.22119	3.00137	2.71855	3.14257	2.90117	2.51631	3.15069	3.05111	-1.56587
ENSMUSG00000038463	Olfml2b	F	-0.574601	0.188437	-0.204053	0.105349	-0.375917	0.100448	-0.24883	-0.106482	-0.174285	-0.107756	-0.3025	-0.714376	-0.0879065	-0.383442	-0.216755	-0.285187	-0.429616	-1.44063	-1.11156	-1.18379	-1.47114	-0.704216	-0.743805	-1.33422	-0.922812	-0.885487	-1.80391	-0.585711	-1.10712	-1.01018	-0.97218	2.74972	2.79233	3.14023	3.12347	3.34657	3.24184	2.98193	3.29061	3.04542	2.84315	3.4829	2.90152	2.84215	3.36796	3.03308	0.0193661
ENSMUSG00000063661	Krt73	F	-0.21248	-0.352256	0.169247	0.28411	1.04812	-0.303508	-0.247571	0.300311	-0.450122	0.457403	0.344397	-0.88142	-0.0160962	0.14153	-0.203369	0.210606	-0.299464	-0.214189	1.33215	1.20992	0.410027	-0.138341	0.365619	-1.10687	0.395614	-0.469161	1.57467	0.000151568	-0.177461	0.401322	0.55505	2.46907	2.28601	2.49288	2.38689	2.47962	2.78226	2.39571	2.6112	2.26301	2.55297	2.4877	2.35938	2.19295	2.09123	2.48397	-0.0808674
ENSMUSG00000046318	Ccbe1	F	-1.76447	-0.609801	-1.09481	-1.26902	-1.10547	-0.26323	-0.993695	-3.4448	-0.670926	-0.524736	-1.20907	-0.913146	-0.2435	-0.791507	-0.841974	-0.0618548	-0.795723	-0.53777	-0.00479607	0.234271	0.490241	0.330449	0.118991	-0.571972	-0.299314	-0.555944	0.184289	-0.92001	0.291772	-0.288094	-0.385437	2.39511	2.76791	3.08474	2.88175	2.80542	2.65806	2.79111	2.77769	2.65758	2.05118	2.70109	2.85256	2.53556	2.76404	2.58983	1.07275
ENSMUSG00000075270	Pde11a	F	0.537415	0.698862	0.704355	0.901157	1.15877	1.2066	-0.306088	1.01156	0.885531	0.597489	0.601094	0.382974	0.466833	0.432949	0.370243	0.588744	1.32702	0.781407	1.3712	1.10748	0.562975	0.317629	1.5036	-0.122035	0.930656	0.833093	-0.0551006	1.07891	-0.00101312	1.07427	0.716765	1.42676	2.01758	2.35034	2.36201	1.43706	2.51625	2.04188	1.59381	2.20382	2.21209	1.49542	1.11045	2.22332	1.50395	2.33473	-0.057883
ENSMUSG00000038793	Lefty1	F	-2.63782	-0.513464	-0.38596	-2.00184	-0.379131	-1.62182	-0.648585	-0.443245	-1.92867	-0.837816	-0.90458	-0.563126	-1.2436	-0.584939	-1.26427	-0.717238	-0.874964	-1.25644	-2.63782	0.243174	-1.4504	0.344552	-1.8333	-1.39373	-0.426437	-0.0644483	-0.526684	-0.304755	-0.376332	-1.60772	0.527404	2.88218	2.88883	2.6884	3.2274	2.89328	3.06737	2.33892	3.2681	3.12008	3.18094	3.44015	3.14032	3.13714	3.25538	3.22729	-0.587276
ENSMUSG00000041957	Pkp2	F	-0.796343	-0.395305	-0.193028	-1.10627	-0.67348	0.29664	-0.313713	0.00496748	-0.501629	-0.111817	-0.260063	-0.204987	0.166688	-0.0871129	-0.0389374	-0.239357	1.03107	0.539747	0.87569	0.501702	0.281472	0.93232	1.08313	0.602015	0.967638	-0.167114	1.14674	0.416475	0.51593	0.598315	0.870795	1.99344	2.37434	2.39822	2.57478	2.74823	2.53837	2.50801	2.52027	2.45227	2.29234	2.75852	2.51159	2.43326	2.59834	2.58984	-0.648695
ENSMUSG00000059852	Kcng2	F	0.298522	-0.0311048	-0.119579	-0.612188	0.390436	-0.0968736	0.123457	0.260242	0.207999	-0.183513	0.133696	-0.336626	-0.280217	-0.199017	-0.159414	-0.375366	0.90174	-0.676149	0.81941	0.269648	0.0545004	0.946163	-0.119079	0.234025	-0.127951	0.863305	-0.181492	0.187888	0.182158	0.607552	0.331981	1.88672	2.19667	2.24253	2.46555	2.15282	2.42886	1.90339	2.01544	2.17827	2.31225	2.37411	1.95582	2.07215	2.23094	2.3911	-0.671983
ENSMUSG00000009075	Cabp7	F	-1.17308	-0.710024	-0.505282	-1.10188	-0.620746	-0.750598	-0.549216	-0.783085	-0.709836	-0.583695	-0.790376	-0.894869	-0.938938	-0.957859	-0.749569	-1.10765	-0.363939	-1.48373	-0.892275	-1.02759	-1.50841	-1.04049	-1.00961	-1.43441	-1.18173	-0.750214	-1.27836	-0.791794	-0.738756	-0.869573	-1.19763	2.33695	2.41346	2.34615	2.51201	2.17762	2.45252	2.01942	2.40601	2.50561	2.41577	2.44248	2.36596	2.18351	2.47802	2.51486	-1.00875
ENSMUSG00000064023	Klk8	F	-0.785835	-1.50754	-0.684758	-1.76784	-0.171512	-1.49299	-0.598383	-1.42173	-1.0574	-1.45149	-0.752664	-0.88558	-0.766002	-1.14687	-0.793773	-1.05099	0.0319881	0.336496	0.68842	0.41403	0.036029	0.403347	0.88976	-0.628315	0.292355	0.0598514	0.396532	-0.140848	-0.785394	-0.100137	0.386661	2.33658	2.45962	1.59997	2.33573	2.53115	2.29696	2.33538	2.68662	2.35488	2.25295	2.53599	2.76914	2.05805	2.72054	2.74121	0.149513
ENSMUSG00000058488	Kl	F	-0.141847	-0.085751	0.165429	-0.316429	-0.0312256	0.415543	0.0521385	-0.150327	-0.26175	-0.294847	-0.0334039	-0.209358	0.181483	0.449757	-0.375517	0.175974	-1.5852	-0.0747507	-0.363887	0.173082	0.489394	0.00967641	0.0609466	0.609609	0.0544241	0.0733151	-0.493681	0.114669	-0.48635	-0.732653	-0.0187968	1.52321	1.72257	1.63097	1.30659	2.74529	4.1039	1.44065	1.74196	1.49847	1.54187	1.67619	4.05008	2.58139	1.66132	1.37844	-1.45712
ENSMUSG00000010175	Prox1	F	0.564984	0.285383	0.364374	0.287668	0.259874	0.190382	0.427891	-0.073332	0.323863	0.406185	0.315857	0.284547	0.441945	0.259579	0.604226	0.16207	-0.846249	-1.23889	-0.960912	-0.783848	-1.00321	-0.686826	-0.664153	-1.92227	-1.49262	-0.238405	-0.851076	-0.781414	-1.18824	-1.06019	-0.801501	2.07692	2.17231	2.26807	1.98674	2.23009	1.71006	1.67952	2.50729	2.05985	1.69414	2.01357	1.6814	1.45313	2.24094	1.9225	-1.36636
ENSMUSG00000027748	Trpc4	F	-0.0749313	0.0311989	0.377338	0.413055	0.323656	0.536566	0.163756	0.278978	0.0435552	0.0954997	0.0655143	0.128696	0.282401	0.135575	0.0516699	0.102533	0.091086	-0.0831505	0.229714	0.218205	0.27221	0.397747	-0.00817923	-0.751601	0.0338059	0.294858	0.102958	-0.310804	-0.220263	-0.120703	-0.364059	1.55215	2.03004	2.01796	1.87949	2.01883	2.06793	1.93441	1.85479	1.94759	2.11407	2.00642	1.50391	2.06167	1.79907	1.88108	0.113651
ENSMUSG00000026579	F5	F	-2.49562	-0.438789	0.0167399	0.561901	0.506928	-0.030385	0.0813667	0.561457	-0.0874642	-0.0130336	-0.39441	-0.152692	0.227674	-0.519658	-0.148075	-0.592315	-0.196545	0.0748246	0.0231624	-0.248829	0.523061	-0.0409633	-1.26903	-0.210321	-0.543347	0.738463	-0.982528	0.00500872	-0.0431183	-0.748412	-0.539686	0.274508	0.667007	0.593725	-0.278308	2.8037	4.57487	-0.270617	0.747467	-0.263206	1.0679	-0.363004	4.8139	2.97988	0.576286	-0.519439	-0.450404
ENSMUSG00000055540	Epha6	F	-0.978364	-0.293715	-0.421124	-0.237924	-0.263753	-0.799212	-0.128232	-0.238656	-0.137903	-0.443875	-0.37296	-0.0272002	-0.293571	-0.0536171	-0.0922364	-0.2537	1.13294	1.16228	0.752534	0.772163	1.05587	0.493988	1.23435	1.22716	0.581554	0.462077	1.48781	0.646302	0.617777	0.934592	0.500526	1.91289	2.13606	2.1071	2.05888	2.26387	2.05044	1.80997	2.27986	2.08171	1.53931	1.97109	2.01967	1.80743	2.06809	2.08274	-0.674389
ENSMUSG00000027217	Tspan18	F	0.268499	0.368163	0.160701	0.471792	0.562326	0.631889	0.161871	0.569335	0.256022	0.408238	0.199985	0.431875	0.295074	0.338617	-0.0313872	0.195093	-0.831295	-0.985672	-0.661966	-0.888075	-1.46743	-1.59614	-1.66311	-2.29134	-1.42479	-0.640646	-1.34837	-0.667917	-1.59639	-0.885301	-0.945529	1.58778	1.72879	2.05311	1.8904	2.18529	1.98891	1.2666	2.15008	1.77476	1.16832	1.96876	1.23219	1.60867	2.04639	1.90195	-2.43882
100042056	NA	F	-0.0292353	-1.24175	-1.7146	-2.3464	-1.84698	-0.480571	-1.25083	-3.62616	-1.91526	-1.242	-1.93604	-1.97154	-1.92672	-2.38945	-1.6331	-2.27441	1.17843	0.878888	0.827838	0.277026	-0.295534	0.361212	0.646546	0.371847	1.52864	0.798502	1.19435	0.773162	0.714662	0.937113	0.403522	1.96447	1.78856	1.68757	1.48317	1.51687	2.15875	1.64867	2.13723	1.95626	1.89376	2.0637	1.71759	1.35371	2.27079	1.76967	-0.488604
100039239	NA	F	-0.49551	-0.944724	-1.72395	-1.17756	-1.35458	-0.91185	-1.57114	-0.155573	-1.15715	-1.22033	-1.57037	-0.788526	-1.07813	-1.26767	-1.13174	-0.964506	-0.321556	-0.443845	-0.409433	-0.656867	-0.796729	-0.838716	-0.430457	-0.862679	-1.21391	-0.243199	-1.97903	-0.767279	-0.838404	-1.04419	-0.873722	2.25032	2.69721	2.23362	2.45061	2.52602	2.43385	1.82675	2.53255	2.38932	2.47734	2.18665	2.40579	2.25317	2.23299	2.54271	-0.559046
ENSMUSG00000050534	Htr5b	F	-0.830554	-0.171375	-0.326087	-0.982754	-0.831659	0.515351	0.454659	-0.133741	0.484279	-0.781063	0.0116052	-0.541759	-0.0764556	-0.165443	-1.31895	-0.213715	0.502061	0.680194	0.797856	0.811336	0.33715	-0.756415	0.854022	0.52443	0.847044	0.629455	0.40968	0.956592	0.138829	-1.05254	0.699612	1.72589	1.62907	1.52964	1.47675	1.50835	1.91277	1.63425	1.47487	2.02433	2.05913	2.01753	1.37933	1.73449	1.94164	1.74847	-0.872587
ENSMUSG00000028360	Slc44a5	F	-0.210699	-0.0732238	0.213542	-0.109549	-0.17021	0.213897	-0.145322	0.222903	-0.132352	-0.339549	0.109328	0.0501482	0.0749889	0.388668	0.312351	0.158219	1.29062	0.278476	0.742815	0.368786	0.232911	0.882916	0.857244	0.569157	0.561889	-0.0307208	0.619006	0.340907	0.00685303	0.66035	0.569401	1.76416	2.0449	2.37439	2.27667	2.13678	2.24877	1.96657	2.08842	2.18007	1.53342	1.92372	1.60519	1.91575	2.34167	2.02451	-0.934627
ENSMUSG00000056752	Dnah9	F	0.479345	1.02958	0.728016	0.793236	0.907123	0.764305	1.14563	0.546727	1.04044	0.875029	0.318005	0.803312	0.82099	0.742276	0.594458	0.601111	0.472588	0.373642	0.41426	0.247747	0.157014	0.678366	0.0626058	0.522999	0.326671	0.137842	0.326104	0.277815	0.381306	0.295128	0.485841	1.46674	1.64736	1.47551	1.2198	1.71925	1.89988	1.47252	1.68971	1.48899	1.96139	1.5446	1.91905	1.65518	1.64391	1.72505	-0.688422
ENSMUSG00000036304	Zdhhc23	F	0.597262	-0.47766	-0.188227	-0.0531679	-0.206477	-0.364838	-0.345266	-1.38999	-0.120293	-0.481748	-0.676981	-0.3143	-0.11069	-0.478395	-0.489281	-0.368153	0.452838	-0.279152	0.679162	0.311897	0.0990836	0.0305276	0.420105	0.347537	0.208705	0.437497	0.110715	0.441956	0.813246	-0.157837	0.291959	1.68084	1.7097	1.82701	1.74426	1.72812	1.87531	1.82897	1.7142	1.67256	1.71158	1.62439	1.86932	2.11395	1.84467	2.10297	0.614149
ENSMUSG00000073514	Dok6	F	-0.25998	-0.213352	0.368084	-0.0677433	0.222357	0.142465	0.355627	0.512533	0.13896	0.315494	-0.180105	0.167132	-0.0482787	0.201322	0.0229181	-0.234824	1.71321	1.30749	1.43933	0.863742	1.19118	1.42609	1.83588	1.44214	0.989126	1.37356	1.36875	1.22712	1.28463	1.06901	1.29565	1.10215	1.16497	1.08494	1.35451	1.07428	1.35916	0.803926	1.15419	1.24738	0.775243	0.539518	0.898114	1.20459	1.1925	1.25952	-0.363928
ENSMUSG00000040441	Slc26a10	F	0.24348	-0.806569	-1.1702	-0.72599	-1.69592	-1.12883	-1.20536	-2.67821	-0.859264	-1.11776	-1.51473	-1.41867	-1.38122	-2.08717	-1.49537	-1.14001	0.616338	-0.0653168	0.210642	0.414589	-0.368283	0.0318476	-0.774611	0.417318	0.229298	0.234199	-0.610547	-0.324804	-0.255537	0.265948	0.574696	2.05857	1.94349	2.11388	1.15578	2.23958	1.43969	2.22505	2.30447	2.17604	2.29165	2.46986	1.98325	1.4037	2.39969	2.73786	0.0426851
ENSMUSG00000040836	Gpr161	F	-0.510357	0.23608	-0.0733427	0.0872185	0.893214	0.41429	0.129331	-0.187633	0.116691	0.500231	-0.0290507	0.0321995	-0.144615	-0.102619	-0.198234	0.0314041	0.664458	-0.253096	0.0833778	-0.236418	0.237321	-0.217567	-0.600012	-1.11764	-0.0162849	0.255467	0.533043	0.166231	0.0520175	-0.093967	-0.365656	1.82678	2.00698	1.69131	2.07571	2.28115	2.63353	1.87472	2.05339	2.1894	2.24667	2.06652	1.63772	2.04649	2.22416	2.33519	-1.44706
ENSMUSG00000070570	Slc17a7	G	-6.09188	-7.18041	-6.8773	-5.50807	-6.15722	-3.84304	-8.09322	-4.83968	-6.23365	-6.60619	-6.24739	-6.27401	-6.72027	-7.13724	-4.1935	-7.2705	1.96651	2.00247	1.7835	2.03971	1.64102	1.38182	1.86799	1.7983	1.88474	1.58646	2.28524	2.02932	2.22841	2.07837	1.84484	1.9544	1.95921	2.04242	2.15482	2.00223	2.2059	1.92818	2.0998	2.10138	1.91543	2.14214	1.87728	1.99226	2.16682	2.09137	1.99787
ENSMUSG00000051985	Igfn1	G	-4.04885	-3.6927	-3.54488	-3.17623	-4.04885	-3.03285	-3.05602	-4.04885	-3.1641	-3.43352	-3.14444	-4.04885	-2.33522	-3.59414	-4.04885	-4.04885	4.42529	4.7625	3.69304	3.94475	4.10229	2.32432	4.37604	4.4995	4.20863	3.62046	4.03357	4.1942	3.86305	4.24894	3.96878	-1.28811	-1.75387	-1.18708	-3.06989	-1.13442	-0.253261	0.652479	-1.99277	-1.0265	-1.66519	-1.78489	0.134193	-0.0707426	-2.52937	-1.71126	3.5795
100503068	NA	G	-4.04359	-3.68744	-2.51678	-4.04359	-2.67772	-2.01967	-3.63213	-2.14219	-2.40384	-2.87938	-3.38259	-3.19308	-3.63684	-3.09778	-3.33304	-3.01173	2.08724	2.67526	1.60512	2.38524	2.0721	1.47584	2.52728	2.39858	1.76875	1.16893	2.32973	2.08506	2.64582	2.03189	2.31383	0.254014	0.678795	0.903177	0.488714	1.23319	0.833523	0.921164	0.597515	0.901031	0.553479	0.987291	0.382804	0.853558	0.527842	0.4024	4.33577
ENSMUSG00000020912	Krt12	G	-1.03035	-2.7587	-2.45867	-4.18095	-3.78538	-3.58531	-4.18095	-4.18095	-2.99847	-2.45635	-3.81292	-2.79897	-2.97758	-3.38102	-1.50072	-4.18095	2.67148	3.27158	2.63781	2.93048	2.59912	2.61517	2.70426	2.96017	2.02114	2.50371	2.73671	2.77715	3.0333	3.00749	3.11904	0.397235	0.748305	0.315098	0.15723	0.910605	0.171152	0.734821	0.99977	0.148715	0.736897	0.650248	0.338353	0.644738	0.629991	1.00668	2.94316
ENSMUSG00000027335	Adra1d	G	-5.0944	-3.22512	-3.77789	-4.49725	-3.49253	-1.9143	-4.17582	-5.24443	-3.36379	-2.90212	-3.32929	-3.02396	-4.357	-3.9058	-3.00108	-3.19662	-0.613901	-0.267701	-0.728047	-0.0862041	-1.44071	-0.57563	-0.623231	-1.32292	-0.461113	-0.35785	-0.31073	-0.666679	0.499324	-0.193089	-0.362962	2.6453	2.63296	2.79232	3.03239	2.85124	3.05163	2.60303	2.93484	2.98535	2.78768	3.07462	2.74454	2.93938	3.00076	2.79777	2.12192
ENSMUSG00000030792	Dkkl1	G	-0.705134	-1.00052	-1.96091	-1.96657	-2.98349	-2.03796	-1.51503	-0.940951	-2.19658	-1.8182	-1.52494	-1.79033	-2.17569	-1.61	-2.19456	-1.92431	2.4472	3.09477	1.57244	2.71363	2.45908	0.654316	2.60594	1.1553	2.77235	1.88748	2.61454	2.49831	2.69853	2.01892	2.14437	-1.59485	-1.52907	-1.56857	-2.26453	-1.13517	-1.7682	-0.420187	-0.858556	-0.540452	-0.914414	-1.1151	-2.8166	-1.56355	-1.60214	-1.47346	3.41524
ENSMUSG00000037474	Dtl	G	-2.75798	-2.14316	-1.92661	-2.87449	-3.22724	-1.621	-2.49601	-3.22724	-2.34249	-2.18194	-2.11464	-2.7402	-1.83303	-2.77253	-2.04274	-2.19539	2.42356	3.05161	2.57602	2.84852	2.73432	2.42412	3.45794	3.27715	2.1909	2.6671	3.01159	2.81563	3.01368	2.99642	2.99262	-0.564349	0.265516	0.062101	-0.677524	0.0065854	-0.176998	1.11497	-0.355973	0.703468	0.544193	-0.310817	-0.332593	0.273469	-0.928455	0.340271	2.72826
ENSMUSG00000001023	S100a5	G	-1.45965	-0.818098	-1.18578	-1.45965	-1.45965	-0.443663	1.19121	-1.45965	-1.18273	-1.45965	-0.00361344	-0.319071	-1.45965	-1.45965	-1.45965	-1.45965	-1.45965	0.61428	-1.06439	-1.45965	-1.45965	-0.28649	-1.45965	1.46058	-1.45965	-1.45965	-0.384624	-1.45965	-0.451054	-1.45965	-1.45965	-0.542156	-0.736102	0.128238	-0.986214	-1.45965	-1.45965	-1.45965	-0.849498	-1.45965	-1.45965	-1.45965	-0.327426	-1.45965	-1.45965	-0.5219	-1.16749
ENSMUSG00000067571	Ms4a15	G	-1.23812	-1.23812	-0.964242	-1.23812	-0.27732	-1.23812	-1.23812	-1.23812	-1.23812	-1.23812	-1.23812	-1.23812	-1.23812	-1.23812	-1.23812	-1.23812	-1.23812	-1.23812	-0.277946	-0.754848	-1.23812	-1.23812	-1.23812	-1.23812	-1.23812	-1.23812	-1.23812	-0.847813	-0.912745	-1.23812	-1.23812	-0.501187	-1.0205	-1.23812	-1.23812	-1.23812	-1.23812	-0.904028	-1.23812	-1.23812	-1.23812	-1.23812	0.17805	-1.23812	-0.780393	-1.23812	-1.23812
ENSMUSG00000055523	Gucy2g	G	-3.36506	-3.00891	-2.8611	-3.36506	-2.40426	-1.01763	-2.37223	-1.04359	-3.08813	-2.92719	-2.46066	-2.22448	-2.16169	-3.36506	-3.36506	-2.3332	2.04013	2.69697	1.38151	2.32241	1.69046	1.52015	2.30792	1.75054	2.02837	1.81028	2.02555	2.25418	2.41333	2.00593	2.0408	0.916146	1.06215	1.209	0.69938	1.01931	0.758823	0.548689	1.02754	1.05468	1.15831	0.879748	0.501695	0.817539	1.66779	1.28258	2.12668
ENSMUSG00000038331	Satb2	G	-1.37817	-1.3162	-1.15441	-0.774005	-1.52758	-0.927931	-2.03167	-1.00166	-1.56236	-1.21243	-1.67715	-1.34378	-1.11445	-1.49785	-2.20763	-1.579	0.326038	0.939192	0.037159	0.974959	-0.335267	0.230289	-0.716122	0.997434	-0.214614	0.140216	-0.315073	0.0312081	1.60994	0.69305	0.573703	1.22757	1.32479	1.05778	1.07086	1.29524	0.980575	1.30092	0.773305	1.09576	1.463	0.814791	1.49405	1.02033	0.836979	1.01641	3.41378
329160	NA	G	-0.800957	-1.02068	-1.84703	-2.83891	-1.7931	-0.863364	-2.06881	-0.689873	-1.93659	-1.40745	-1.50922	-1.26883	-0.565332	-2.16336	-2.29038	-0.920279	0.366712	0.894115	-0.376539	0.82537	-1.40669	0.788027	-1.02087	0.480064	0.140611	-0.791503	-0.229202	0.0947919	2.12687	0.223872	0.650738	1.19432	1.38327	1.22978	0.71767	1.17023	0.396299	0.810623	1.08805	1.34295	1.78682	1.03368	1.48107	1.35081	0.569083	1.10337	3.42624
320155	NA	G	-0.856789	-2.58206	-2.58206	-2.22931	-2.18649	-2.58206	-1.58923	-2.58206	-2.30513	-1.96673	-1.92105	-1.44147	-1.85838	-1.78212	-2.58206	-2.58206	1.75061	2.04299	1.564	1.59667	1.09786	1.74991	1.82102	1.65006	1.26948	-0.644825	2.29603	1.2927	2.01935	1.56154	1.50042	0.437771	0.779743	0.669803	0.672715	0.806858	0.73472	1.25485	-0.200385	0.189711	1.52828	0.293422	-1.30088	0.0686267	-0.728606	-0.0362579	3.16013
ENSMUSG00000074006	Omp	G	-0.0575099	0.663656	0.000709763	-0.365494	1.03606	0.203063	1.93658	-0.409962	-0.824179	-0.546837	-0.0262922	0.834444	-0.756455	0.242069	-0.370579	0.197627	-1.97962	-1.14337	-0.572131	-2.73144	-0.120314	-0.0683189	-1.21219	1.85316	-1.238	-1.77298	-1.6564	-2.03425	-1.72284	-2.73144	-1.38507	-1.50909	-0.756688	-0.268408	-0.913931	-1.99395	-1.647	-0.43608	-1.22428	-1.34226	-1.40568	-1.69131	-1.31527	-1.6749	-1.52553	-0.930255	-1.03334
ENSMUSG00000037279	Ovol2	G	-2.07002	-2.07002	-2.07002	-2.07002	-0.892513	-2.07002	-2.07002	-2.07002	-1.79309	-1.83453	-1.70199	-2.07002	-1.66327	-2.07002	-2.07002	-2.07002	-2.07002	0.741326	-0.893231	0.88687	-1.10057	-0.39359	-2.07002	-2.07002	0.446133	-0.0465814	0.159333	-0.145519	1.75327	-0.866691	0.965491	0.374701	1.22156	0.688614	0.328494	1.22394	0.2292	0.788759	0.995203	0.952328	1.07313	0.372774	0.62666	1.28604	0.384294	0.229745	3.45727
ENSMUSG00000022237	Ankrd33b	G	-4.25673	-3.54491	-4.14955	-4.3241	-3.35523	-2.55193	-3.48254	-4.14106	-3.94438	-3.7697	-3.72042	-4.2699	-3.50027	-3.46867	-3.53138	-3.9317	1.35563	1.58595	0.956247	1.23119	1.36261	0.66687	1.54594	1.36212	0.977491	0.741228	1.64614	1.22484	1.31026	1.08207	1.14671	1.42001	1.64024	1.591	1.49772	1.7156	1.46804	1.45137	1.52604	1.54887	1.71325	1.54133	1.42765	1.5413	1.42517	1.58366	1.93365
ENSMUSG00000043439	Epop	G	-1.38794	-1.90744	-2.60381	-1.86734	-2.10904	-2.47338	-2.22089	-1.78319	-2.55358	-2.72928	-2.00393	-2.43867	-2.32395	-2.83696	-2.11536	-2.66246	2.26735	1.46944	1.66118	1.98986	1.48312	0.983962	1.60278	1.59087	1.99742	1.65432	1.84982	1.75086	2.02221	1.82267	1.60634	0.827566	0.754115	0.358812	0.797332	0.466426	0.897033	0.84914	0.637537	0.851004	1.15334	0.712683	0.486468	0.763514	0.528301	0.755429	2.43437
68144	NA	G	-2.2332	-1.59165	-2.2332	-2.2332	-2.2332	-1.63756	-1.50197	-2.2332	-2.2332	-1.45988	-0.631917	-2.2332	-1.50953	-1.28739	-1.83462	-2.2332	1.16935	0.578139	-0.417033	-1.38856	-0.689129	0.859402	0.00949473	0.194348	0.680619	-0.0514252	1.06753	0.267618	0.951976	1.43631	2.31334	-0.358794	-0.199902	0.0922408	-0.497464	-0.161817	-1.14877	0.625573	-0.726049	-0.149623	2.32749	1.27178	1.67995	1.9302	0.715542	0.141238	2.79583
ENSMUSG00000068117	Mei1	G	-1.80121	-2.45803	-1.28534	-2.45803	-2.45803	-2.45803	-2.45803	-2.45803	-2.1811	-2.45803	-2.45803	-1.60752	-2.45803	-2.45803	-2.45803	-2.45803	1.2389	2.60826	2.04961	1.7207	1.62672	2.31577	1.81181	1.97027	2.37976	1.01962	1.61782	1.50559	2.33986	2.10677	1.72998	-0.0734319	-0.608041	-0.754546	-0.489707	-0.0600787	-0.938199	0.500844	-0.597215	-0.268225	0.354788	-0.636162	0.341028	-0.219319	-1.03569	-0.712035	2.38042
ENSMUSG00000027296	Itpka	G	-3.89317	-3.84404	-3.50426	-4.01172	-3.24177	-2.69508	-3.61478	-3.88528	-3.94645	-3.8682	-3.80698	-3.88491	-3.75474	-3.64805	-3.7404	-4.04053	1.22076	0.96044	0.946511	1.32134	0.720047	0.695277	0.749029	0.972794	0.882497	0.788733	1.19908	0.99983	1.20834	1.20788	1.065	1.69243	1.50052	1.29322	1.62778	1.57645	1.66837	1.27095	1.67931	1.73421	1.96105	1.79823	1.44738	1.56393	1.62223	1.78543	1.1501
ENSMUSG00000032355	Mlip	G	-1.98629	-2.69008	-2.30227	-2.17465	-2.79901	-2.78595	-2.75207	-1.83109	-2.06346	-1.9564	-2.35979	-3.23411	-2.22819	-2.38188	-2.25524	-1.39001	2.00031	1.44593	1.31935	1.77218	1.45231	0.508502	1.70827	1.04344	1.28658	1.10204	1.72475	1.26128	1.34329	1.59748	1.08896	1.03088	1.09224	0.980661	0.678855	1.25473	0.772775	1.23056	1.10061	1.02494	1.48821	1.22719	0.84041	1.33147	0.997988	1.21626	2.32511
ENSMUSG00000004655	Aqp1	G	-2.46199	-0.765971	-2.18811	-2.46199	-1.7563	-1.86634	-0.472755	-2.46199	-1.75284	-0.737379	-1.55758	-1.97495	-1.47862	-1.04661	-0.511927	-1.20324	0.0709204	-0.388052	-1.09691	-0.701783	-0.508069	-0.78556	0.486439	-2.46199	-1.67436	0.63324	-2.46199	-0.795365	-0.278705	-2.12795	-1.26942	-0.140125	0.350306	-0.874094	-1.00367	1.76679	4.59775	-1.85681	0.0585174	-1.26322	-0.0783278	-0.477234	4.15311	2.45821	-0.851491	0.115769	-0.763892
ENSMUSG00000035355	Kcnh4	G	-0.617146	0.367599	-0.74709	-0.922606	-0.0181868	0.409708	0.0435757	0.127077	-0.170254	-0.445009	-0.57381	-0.314564	-0.099913	0.165804	-1.38416	-0.433601	2.09361	1.79733	1.5304	1.33078	1.39354	1.64942	1.49035	1.94647	1.95156	1.6967	1.49352	1.79842	1.88149	2.01326	1.70589	-0.776488	-0.730799	-0.675708	-0.625664	-1.63133	-1.71486	-1.12433	-0.988796	-0.602621	-0.400786	-0.46891	-1.15557	-0.140462	-0.633831	-0.422645	2.14389
100125263	NA	G	1.03403	0.31275	1.42229	0.840633	0.94475	0.625585	0.324506	0.14074	0.146902	0.752533	0.653446	-0.0557744	-0.423189	0.129959	0.374923	0.286211	0.157966	-1.13587	-1.28074	-1.14129	-1.27336	0.0628771	-1.98593	-1.98593	-1.98593	-0.714	-0.00357683	-0.633537	-0.515564	-0.360982	-0.500591	-0.763588	-1.26238	-1.98593	-0.871399	-1.50013	-1.18103	-1.15264	-1.98593	0.395392	-1.60595	-1.47744	-1.42347	-1.98593	-1.03476	-0.952889	3.27192
ENSMUSG00000044254	Pcsk9	G	-0.206423	-1.12953	-0.575845	-0.890711	-0.257796	-0.347719	-0.590719	-0.202078	-0.63366	-0.2072	-0.43884	-1.55457	-0.60534	-0.708167	-0.0883793	-1.43641	3.16548	4.08293	2.60688	3.22815	2.28938	1.03133	3.13754	3.18158	3.64267	2.73813	3.60575	3.53848	3.54577	3.49287	2.59224	-1.95822	-1.9716	-2.69515	-1.71619	-1.24366	-1.48894	-1.66493	-1.65752	-0.726241	-1.55417	-2.18666	-2.13269	-1.09114	-1.48925	-2.69515	0.169823
ENSMUSG00000026315	Serpinb8	G	-3.4641	-2.38001	-3.4641	-3.4641	-3.4641	-2.86845	-1.8887	-3.4641	-3.18717	-3.02623	-3.09606	-2.97705	-3.4641	-1.54616	-2.09055	-3.03304	1.344	1.25187	1.04354	0.315492	0.593243	1.32616	0.349926	0.465159	0.0632778	0.290561	0.334192	0.379777	1.15226	0.636333	1.32982	0.0241159	0.0698047	0.267888	0.0332676	0.418136	-0.0180855	0.175792	0.18912	0.197982	-0.225741	0.169247	0.699885	0.0212429	0.0537512	0.454821	2.95966
ENSMUSG00000050010	Shisa3	G	-2.24747	-0.681855	-1.37074	-1.17162	0.189882	0.58719	-1.51624	0.446634	-1.20619	-0.871348	-1.13486	-0.658746	-1.0441	-0.935949	0.281893	-1.21561	-2.24747	-0.0421977	-0.882393	0.0684117	0.204348	-1.07431	1.12158	0.773504	-0.42298	-0.0656947	-0.406523	-0.209487	-0.234591	-1.41428	-1.64888	-1.16951	-1.52392	-0.922907	-0.598412	-1.10926	-1.16304	-1.64229	-1.91038	-1.26813	-1.86749	-1.73898	-0.831304	-1.80389	-1.4428	-1.21443	-0.452872
ENSMUSG00000061086	Myl4	G	-1.12103	-0.409429	-0.752543	-0.352559	-1.13986	-0.681109	-0.891914	-0.326891	-1.3267	-0.894807	-2.02522	-1.33862	-1.68317	-1.08687	-1.06253	-1.32474	0.740943	0.212497	0.648146	1.44241	0.902383	0.335622	0.714216	0.150046	0.84412	1.09423	1.08652	0.504913	1.41349	1.0609	0.698606	-1.26798	-1.20743	-0.746168	-0.567028	-0.866224	-0.589864	-1.58399	-0.814124	-0.915682	-0.786258	-0.515274	-1.61202	-1.09702	-0.965912	-0.41063	3.04596
ENSMUSG00000023046	Igfbp6	G	-1.62531	-3.69296	-3.42189	-1.91093	-3.55632	-1.78969	-3.33411	-3.85168	-3.92067	-2.6576	-3.48518	-3.2701	-3.93212	-1.40409	-3.22687	-4.27982	1.42718	0.937968	1.03512	1.25732	0.586379	0.805161	0.762289	0.977487	1.31354	1.00362	1.08771	0.988382	1.31938	0.827856	0.762358	-0.0969719	-0.380454	-0.161327	-0.0808664	-0.260044	-0.156169	-0.263548	-0.540031	-0.00160755	0.209787	-0.423761	-0.55619	-0.48901	-0.57782	-0.258126	1.91114
ENSMUSG00000046321	Hs3st2	G	-1.22351	-0.849626	-1.06407	-1.97649	-0.570446	-0.29279	-1.30281	-1.32753	-1.07689	-0.673955	-0.716241	-1.3738	-1.24146	-0.952964	-1.19803	-0.65271	0.402717	1.31386	0.785741	1.40579	0.887592	0.0471897	0.951409	0.871845	1.49756	0.810985	1.17199	1.19965	1.43654	0.826242	1.24814	-0.122437	-0.0333436	-0.218483	0.215527	0.060921	0.519257	0.142023	0.0153819	0.317022	0.371057	0.0714309	-0.703846	0.210395	-0.28095	0.0410235	2.69717
ENSMUSG00000037868	Egr2	G	-1.00175	-0.911416	-2.22305	-0.440755	-0.909923	-1.38592	-0.323646	-2.72701	-2.01787	-1.16615	-1.43249	-1.34503	-1.3328	-0.957958	-0.556983	-1.69516	1.55584	2.03235	2.20972	1.81419	1.53629	1.30636	1.70129	1.73751	2.01614	1.61897	2.09573	1.93019	2.2321	1.68726	1.88167	-1.64905	0.0852789	-0.916519	-0.832131	-0.404039	0.0362866	1.00062	-1.21986	0.508759	-0.112877	-0.284223	-0.0843881	-0.104165	-0.0458	-0.087391	1.73899
ENSMUSG00000032528	Vipr1	G	-1.5274	-2.31149	-2.32877	-1.99985	-3.63848	-1.96719	-4.0495	-2.15711	-3.46913	-3.27097	-2.40859	-3.38088	-2.54602	-2.62503	-2.70543	-3.6742	1.46768	1.25225	1.00886	0.966578	1.22471	0.725104	0.651643	0.706808	1.31538	0.968867	0.504229	0.930531	1.06522	1.24005	1.07234	1.14426	1.16921	1.19264	1.09045	1.20584	1.11903	1.15437	1.18402	0.918359	1.27457	1.29244	0.734159	1.09524	1.07546	1.04784	2.08158
ENSMUSG00000005583	Mef2c	G	-2.46273	-2.47251	-2.19918	-1.95062	-2.34214	-2.4747	-2.31047	-2.21677	-2.09198	-2.2607	-2.26609	-1.96454	-1.94488	-1.99676	-1.84158	-2.37336	1.48792	1.71894	1.59364	1.61702	1.45503	1.27184	1.56132	1.54726	1.10217	1.33579	1.82198	1.2443	1.92745	1.57704	1.52479	0.157447	0.360547	0.436479	0.025343	0.376516	-0.203752	0.63421	0.211269	0.334574	0.229393	0.146706	0.190334	0.0410596	-0.108664	-0.132454	2.59471
ENSMUSG00000026167	Wnt10a	G	-2.1348	-1.55501	-2.70687	-2.32964	-0.987287	-1.75346	-1.18023	-0.843328	-1.08396	-1.399	-2.12756	-1.50891	-2.18938	-1.29367	-1.51937	-0.792889	0.843822	0.757102	0.483268	0.932731	0.297332	0.50403	1.03209	1.21477	0.470731	0.565526	0.751536	0.568279	1.17438	0.830675	0.454409	0.777776	0.928413	-0.37023	0.654204	0.974285	0.509039	1.1032	0.530696	0.879154	0.338824	0.167609	0.501517	-0.210738	0.58541	0.177263	2.54389
320297	NA	G	-1.45587	-1.45587	-1.45587	-1.45587	-1.45587	-1.45587	-1.04441	-1.45587	-1.45587	-1.018	-0.794862	-0.605358	-1.45587	-0.818243	-0.488966	-1.45587	-1.45587	-0.315823	-1.45587	0.124062	-0.268449	-1.45587	0.0633778	1.23896	0.509436	0.56757	-0.148035	-0.103469	1.01761	-1.45587	-0.263295	-0.538366	-0.252673	-0.283498	-0.341331	-0.718376	-0.249659	-0.622571	-0.616198	-1.45587	0.314169	-1.17933	-0.489747	-1.01228	-0.65119	-1.12063	3.22738
ENSMUSG00000039714	Cplx3	G	-0.961926	-1.44656	-1.45226	-1.56862	-1.09756	-2.20046	-1.23803	-2.07371	-1.64812	-1.37869	-1.45341	-1.75819	-1.61646	-1.56465	-1.39507	-1.60447	0.563286	1.27044	0.641902	0.982867	1.11927	1.23806	0.879128	1.12501	0.514079	0.853572	0.247512	0.13199	1.69853	0.616701	1.13629	0.715579	0.291159	0.441943	0.0752668	0.856544	0.142365	0.792237	0.710323	1.01263	0.772894	0.336275	0.445464	0.530719	0.0946854	0.662509	2.61296
ENSMUSG00000027318	Adam33	G	0.799385	-0.304535	0.0900021	-3.19987	-1.834	-1.17594	-1.21063	0.326475	-0.364601	0.0224925	-0.494722	-0.993814	-0.565022	-0.706381	-0.449728	-0.927721	2.03238	0.857617	0.811693	0.448529	0.771966	1.73058	0.759717	1.89277	1.03224	0.215371	0.778046	1.42137	0.945593	1.51561	1.1424	-1.32546	-1.22512	-0.80399	-1.84729	-1.12848	-0.476805	-0.0174783	-1.44758	-0.0668633	-0.450283	-1.4669	-1.00581	-0.495076	-1.77753	-0.654067	2.2406
ENSMUSG00000016763	Scube1	G	-1.41723	-1.21666	-0.949805	-1.4451	-1.03296	-1.14767	-1.29438	-1.04424	-1.53414	-1.27741	-1.43826	-1.62203	-1.2246	-1.36329	-1.4402	-0.990652	1.72649	2.41875	1.03589	1.91043	1.35857	-0.0781879	2.12292	1.51617	1.99859	1.2252	2.12139	2.03736	1.97947	1.76078	1.45704	0.0800078	0.1833	0.356207	0.520977	0.324731	0.469421	0.160953	0.367061	0.394168	0.172134	0.285099	0.254689	0.449045	0.427219	0.482673	1.63704
ENSMUSG00000033633	Clec18a	G	-1.69142	-0.490302	-1.28212	-0.448462	0.296928	-0.39579	-0.605533	-1.60133	-1.12947	-0.75391	-0.988795	-0.518096	-1.61666	-1.56123	-0.882719	-1.16609	1.22853	1.34094	1.00785	1.10876	1.29222	1.15101	1.02096	0.88066	1.06007	0.424368	1.51114	0.743897	1.71976	1.60995	1.7643	-0.391761	0.339008	0.288457	-0.135452	-0.1592	0.279164	0.183622	-0.459016	0.134326	0.376032	-0.0578823	-0.390115	0.625677	0.34342	0.637685	2.31169
ENSMUSG00000032532	Cck	G	-2.39675	-2.77904	-2.21344	-2.75974	-1.90482	-2.30237	-2.80808	-2.4548	-2.83099	-2.20764	-2.58157	-2.65404	-2.85529	-2.43394	-2.01234	-2.66976	0.983368	0.898559	1.01196	1.09922	0.6768	0.833352	0.687564	0.890635	1.06728	0.723459	1.22981	1.02876	1.25186	1.11433	1.06306	1.35823	1.20475	1.17022	1.3266	1.15991	1.34351	1.17027	1.14399	1.36768	1.21162	1.40232	1.27307	1.04239	1.15082	1.35786	1.63752
ENSMUSG00000005124	Wisp1	G	-3.10219	-1.53657	-2.82831	-2.74944	-2.70662	-2.50654	-2.37096	-1.92417	-2.39304	-1.72606	-1.98958	-2.25168	-2.69544	-2.30226	-2.70361	-0.937986	1.61506	1.4507	1.30187	0.183808	1.11232	0.141426	0.318067	1.65297	1.26297	0.520601	1.28475	1.17055	1.38993	1.01999	1.31143	-1.41419	-1.01262	-0.706313	-1.20731	-0.532258	-0.749243	-0.467209	-0.649432	-1.25786	-1.77644	-0.776123	-1.34348	-0.977935	-1.40608	-0.764604	2.29282
ENSMUSG00000001444	Tbx21	G	0.558823	-0.205002	0.651251	0.973398	0.213727	-1.46805	-0.736822	-0.430871	-0.958893	-1.23257	-0.563649	-0.981013	-0.744378	-0.0526792	-0.757508	-1.037	-1.46805	-0.328012	-1.46805	-0.334669	-1.46805	-1.46805	-1.46805	-1.46805	0.497247	-0.0617039	-0.160224	-0.770865	-1.46805	-1.13401	-0.447657	-0.390095	-1.06139	-1.14525	-0.489096	0.458909	-0.826257	0.0297278	-0.25638	-1.06331	-1.46805	-0.584333	-0.0518851	-0.685686	-0.0457176	-0.345627	-0.237339
ENSMUSG00000046818	Ddit4l	G	-1.19777	-1.30739	-1.36867	-0.722563	-1.21175	-0.337881	-0.610948	-1.11609	-0.90008	-1.22929	-1.16758	-1.06215	-1.38011	-0.946488	-0.987776	-1.01469	0.608757	0.731045	0.552446	0.522575	0.353669	0.271839	-0.0645039	0.285022	-0.412996	0.381082	0.0681188	0.0854029	1.02697	0.682739	0.275099	1.04893	0.897014	0.515573	0.450887	1.08914	0.402081	0.349825	0.560258	0.561678	0.38968	0.320366	0.845102	0.619886	0.91672	0.417834	2.54906
ENSMUSG00000020374	Rasgef1c	G	0.149426	0.20339	0.264573	0.352838	0.246995	-0.373926	0.222921	-0.0109622	0.421443	0.285978	-0.0666325	-0.120147	0.356777	0.176421	0.0545449	0.0388021	1.87034	2.27666	1.62252	1.99221	1.8334	1.00319	2.10121	2.06351	1.90948	1.58698	2.02047	2.02685	1.98393	2.00222	1.71112	-2.4646	-2.37169	-2.8162	-2.076	-2.43924	-2.255	-1.57895	-2.71123	-2.31758	-2.29791	-2.35947	-2.64044	-1.95381	-2.72026	-2.43024	1.39051
ENSMUSG00000026479	Lamc2	G	-2.7031	-1.93779	-1.56843	-1.39924	-1.5608	-2.17477	-1.67285	-3.12722	-1.45038	-0.840592	-1.89224	-1.84809	-1.75073	-1.32722	-1.49754	-1.48891	2.15759	2.53614	1.38252	1.91419	1.8126	0.991087	2.50556	2.23098	2.26519	1.39619	2.63144	2.4088	2.32252	2.21576	1.92283	-0.59188	-0.867213	-0.370711	-0.892251	-0.135468	-0.845423	0.165566	-0.568077	-0.0756864	-0.155942	-1.00258	-0.555039	-0.857145	-1.02941	-1.22607	1.41533
ENSMUSG00000048458	Inka2	G	-2.89191	-2.74525	-2.11916	-2.37832	-2.97723	-2.56226	-2.52552	-2.22853	-2.77439	-2.76968	-2.79799	-2.88294	-2.51048	-2.93486	-2.47817	-3.04703	1.12906	1.16143	0.886828	0.98954	0.884239	0.432398	1.17654	0.912322	0.989356	0.529168	1.13574	1.03145	1.02375	0.937026	0.721389	1.18011	1.17219	1.11501	1.20688	1.22001	1.118	0.941327	1.36232	1.12275	1.09593	1.37426	1.1482	1.19395	1.29665	1.27738	1.69819
ENSMUSG00000024871	Doc2g	G	-1.03776	-0.73566	-1.30391	0.112375	-0.984874	-0.528385	-1.30622	-0.0389969	-1.05024	-1.32385	-0.815805	-1.31923	-1.45507	-1.23088	-1.0218	-1.17222	-0.305001	-0.703375	-0.222265	-0.766115	-1.14664	0.185815	-0.551255	-0.490928	-0.0817928	-0.727124	-0.949975	-1.05451	-1.4876	-0.366541	-0.192125	-0.587609	-1.05386	-1.22727	-1.03883	-1.13142	-0.866147	-0.852574	-1.49035	-1.15508	-0.867774	-1.35037	-0.596826	-1.28662	-0.705994	-1.28773	-0.652678
ENSMUSG00000050201	Otop2	G	-1.84474	-1.48859	-1.14238	-1.84474	-1.84474	-1.84474	-1.43328	-1.84474	-0.662255	-1.22941	-1.84474	-1.84474	-1.43799	-1.59954	-1.13419	-1.84474	0.600304	1.45222	0.209004	0.582066	1.21623	0.49979	-1.04022	0.254506	1.38049	0.728631	0.266395	0.942437	1.02804	0.663619	-0.498367	-0.491151	-0.861523	-0.141255	-0.38642	-0.541396	-0.638531	0.00559476	-1.23458	-1.12427	-1.46475	-0.961016	-1.06638	-1.84474	-0.526563	-0.558617	0.778863
ENSMUSG00000040164	Kcns1	G	-2.54879	-1.13862	-1.62819	-2.93645	-1.5955	-1.94629	-1.39478	-2.7846	-1.71568	-1.55575	-1.94209	-1.92486	-1.75068	-1.45746	-1.82404	-1.70587	0.929081	0.830628	1.27228	1.10253	0.389175	0.834236	0.907746	0.217884	0.421748	1.15748	0.921464	1.02278	1.26185	0.923468	1.35264	0.53506	0.507914	0.633355	0.814482	0.570387	0.567705	0.50838	0.591701	0.858685	0.541098	0.677827	0.375428	0.635174	0.771125	0.751467	2.05539
102688	NA	G	-2.02499	-2.27862	-0.650761	-2.27862	-2.27862	-1.26262	-0.872546	-1.39752	-0.96753	-1.50529	-0.984095	-0.0725638	-0.303634	-0.766365	-1.56807	-1.84756	3.11489	3.01132	2.05953	2.63055	2.74893	1.10169	2.22284	2.97795	2.61311	2.24056	2.68724	2.5774	2.13004	2.15318	2.44684	-0.0910525	-0.134886	-0.468121	-1.16408	-0.630026	-1.32719	0.903772	-1.24099	-0.434285	0.0192391	-0.850871	-0.739008	0.257357	-1.07271	-0.140916	1.30624
ENSMUSG00000022602	Arc	G	-1.88828	-1.84418	-2.21364	-1.59017	-1.98043	-2.35174	-1.93566	-1.29143	-2.07157	-1.9561	-2.43616	-2.07011	-2.25043	-2.08762	-2.48964	-1.98193	0.855835	0.434037	0.340623	0.584341	0.259687	-0.569806	1.02156	0.263419	1.06042	0.215682	-0.162772	0.739035	0.89902	0.408694	0.463838	0.799977	0.793161	0.298864	0.873828	0.489873	1.10692	0.626122	0.603438	1.25399	0.788223	0.677031	1.09251	0.857332	1.00616	0.926641	2.08006
ENSMUSG00000071341	Egr4	G	-1.7669	-2.01316	-2.84555	-2.22192	-2.04965	-1.54872	-2.25931	-2.02562	-2.08894	-2.06175	-2.30509	-2.8563	-2.19439	-1.98346	-2.69232	-2.52263	1.21066	1.16039	1.21188	1.65147	0.927073	0.462832	1.29184	1.07443	2.03952	1.38188	1.57327	1.62063	1.74408	1.72838	1.48382	0.790368	0.859314	0.586547	0.850296	0.601902	0.98877	0.614146	0.567809	0.873067	0.905776	0.735545	0.651111	0.523965	0.6766	0.837544	1.28931
ENSMUSG00000020216	Jsrp1	G	-1.52778	-1.05056	-1.67595	-1.29134	-0.380264	-1.14643	-1.76238	-1.44352	-0.775762	-0.68362	-1.24334	-1.836	-1.26295	-0.860687	-1.02652	-0.812377	1.38037	1.64847	1.46981	2.02509	1.54923	1.79722	0.837442	1.94418	2.11274	1.22895	2.37546	1.31917	1.87286	1.98794	1.98147	-0.0380518	0.0811284	0.156596	0.218257	-0.0119645	-0.136017	0.469963	-0.00507705	-0.137971	0.945846	0.501297	0.688053	0.412899	0.339715	0.457637	0.832772
ENSMUSG00000017493	Igfbp4	G	-1.77939	-1.80468	-1.56802	-1.82941	-1.3533	-1.14583	-1.15534	-2.13241	-1.56285	-1.37904	-1.76188	-1.78978	-1.98111	-1.42324	-1.62421	-1.99031	0.320238	0.149393	0.490287	0.502923	0.339045	0.212601	0.0802017	0.0143115	0.319081	0.237631	0.245858	0.321256	0.563704	0.359306	0.133857	1.38857	1.16474	0.788449	1.08048	1.20965	1.26033	0.849264	1.3464	1.18405	1.26982	1.26848	1.1237	1.13114	1.25224	1.1689	1.74424
ENSMUSG00000035357	Pdzrn3	G	-0.526786	-0.906742	-1.24026	-1.06743	-0.630327	-1.20737	-1.37981	-2.88268	-1.14273	-1.37665	-1.47528	-1.33208	-1.27953	-1.2832	-1.77722	-1.07702	1.27934	1.83437	1.43838	1.7867	1.22795	0.873476	1.68109	1.65231	1.2711	1.543	1.67535	1.41493	1.92208	1.56249	1.4984	-0.117485	-0.106444	-0.414225	-0.378975	-0.24423	-0.380701	0.198405	-0.489124	-0.406755	-0.245919	-0.616046	-0.113562	-0.0918239	-0.340965	-0.458535	1.9405
ENSMUSG00000066189	Cacng3	G	-0.879566	-0.685014	-0.871953	-1.44687	-0.739731	-1.12491	-1.24082	-1.02328	-0.961054	-1.058	-1.00541	-1.03586	-1.09616	-1.06549	-1.11004	-0.608445	1.34116	1.46123	1.28612	1.37579	1.1487	0.952375	1.38247	1.13953	1.25261	0.906537	1.56437	1.37245	1.36182	1.52124	1.22956	0.368603	0.385898	0.0157288	0.286982	0.454067	0.114428	0.403323	0.369569	0.398691	0.376853	0.378179	0.0974802	0.405605	0.366429	0.41156	1.63417
ENSMUSG00000091387	Gcnt4	G	-1.59956	-1.0032	-1.01875	-1.51646	-0.886026	-0.784139	-0.867104	-0.403573	-0.396086	-1.26058	-0.553582	-0.525134	-0.588081	-0.914278	-0.522201	-0.532316	0.959572	0.650618	-0.0828016	0.432363	0.400094	0.455961	-0.338428	0.948383	-0.583506	0.301913	-0.0113507	0.0693634	0.695174	-0.172032	0.770365	0.258258	0.435364	0.583248	0.158031	0.2545	0.334295	0.517488	0.0819926	0.205652	0.319336	0.238331	0.744485	0.286439	0.0915856	-0.609848	2.68342
ENSMUSG00000001119	Col6a1	G	-0.659469	-1.15955	-1.70579	-1.07449	-1.20595	-0.071678	-1.45655	-1.22534	-1.66072	-1.2702	-1.43681	-1.32601	-1.75057	-1.00932	-1.81365	-1.97952	1.89464	1.71857	1.5666	1.14862	0.996991	2.21263	0.772134	1.64169	1.81093	1.30436	0.53325	1.71789	1.25945	2.17495	1.48831	-0.77242	-0.249964	0.223123	0.234439	-0.5067	0.706446	0.124387	-0.405743	-0.22066	-0.518875	-0.823093	-0.764937	0.513283	-0.0790061	0.0411294	1.23092
ENSMUSG00000061132	Blnk	G	-1.29664	-1.37599	-1.38146	-0.249447	-1.81026	-1.62313	-0.813411	0.660545	-0.604465	-0.862223	-1.80478	-1.76451	-1.26199	-1.14003	-1.70197	-1.41596	0.987908	0.851545	0.389887	0.666036	0.193429	0.944961	0.15247	1.56674	0.60695	-0.433098	1.20127	0.0493966	0.853331	1.08719	0.607385	0.43686	0.551708	0.891658	0.655491	0.901886	0.656936	0.773474	0.744692	0.614031	0.514492	0.839061	1.1427	0.240355	0.849944	0.931754	1.76555
100502774	NA	G	-0.845588	-2.09726	-1.79723	-0.692948	-1.70242	-1.32479	-1.7926	-2.81347	-1.38668	-2.6038	-1.45033	-1.08196	-1.80589	-2.44123	-1.56945	-2.06476	1.43896	2.01486	1.63712	1.31114	1.4056	1.68091	1.68349	1.06508	0.919958	1.18069	1.89625	1.11982	1.726	1.43292	0.978611	0.0786695	0.014386	0.391478	0.0504233	0.534827	-0.469267	0.394236	0.504303	0.142564	-0.376363	-0.215902	0.503495	0.194092	0.175147	0.0949754	1.93579
ENSMUSG00000020080	Hkdc1	G	-1.76805	-1.55985	-1.09839	-3.80168	-1.55811	-1.9597	-0.752412	-0.408528	-1.45357	-1.01673	-2.18877	-2.07974	-1.51958	-1.97816	-1.40429	-1.03993	-0.751878	0.398461	-0.456555	0.411222	-0.708145	-0.64927	-1.206	0.198567	-0.197933	-0.189095	-0.143127	-1.43369	0.917492	-0.344295	-0.72541	0.489349	0.205747	-0.196121	-0.325982	0.528654	0.210811	-0.37112	-0.084661	0.128004	0.495544	0.299546	0.0843257	0.281108	0.157039	0.594938	2.33928
ENSMUSG00000000126	Wnt9a	G	0.240843	-0.924162	-0.840421	-0.777031	-0.883518	-1.47152	-0.95393	-1.87742	-1.38184	-0.946481	-0.993544	-1.28338	-1.71845	-1.3886	-0.0935001	-1.02683	1.06082	0.859499	1.2386	1.2401	0.82576	0.323801	0.0911528	1.08789	0.799042	0.98946	1.34257	0.623176	1.77682	1.31635	1.11841	0.195796	0.422157	0.256316	-0.179764	-0.126099	-0.0357722	0.55826	0.266517	0.181426	0.81901	0.273585	0.442703	0.364665	-0.187883	0.429303	1.7707
100503874	NA	G	-2.88789	0.209745	-2.01116	-2.01528	-1.20611	-0.276375	-0.484525	-0.628476	-1.24814	-0.760688	0.303755	-1.74731	-0.179316	-1.04248	-1.51435	-1.10652	-0.860176	1.06131	-1.35628	-1.30797	-0.133326	0.905414	-1.56994	1.30157	1.19763	-0.633018	-0.179963	-0.387072	0.553934	0.55843	1.12736	-0.175245	-0.144082	-0.183735	-0.993011	-1.17917	-0.702538	-0.379339	-0.743272	-0.804314	1.45445	0.793758	0.604081	0.951976	-0.892587	-0.218304	1.86906
ENSMUSG00000030123	Plxnd1	G	-1.53471	-1.17382	-1.47456	-1.62459	-0.963275	-1.51816	-1.68544	-1.81203	-1.59209	-1.3784	-1.58143	-1.68564	-1.73556	-1.51439	-1.74355	-1.79384	2.29375	2.25507	2.01139	2.29251	1.99624	1.49439	2.08866	2.11284	1.94655	2.00284	2.11757	2.21209	2.22779	2.22896	2.07156	-0.746532	-0.662105	-1.14199	-0.857113	-0.783936	-0.92136	-0.415257	-0.826875	-0.643096	-0.668955	-1.10914	-0.723989	-0.65375	-1.15902	-0.975768	0.997062
ENSMUSG00000031283	Chrdl1	G	-3.47638	-1.65542	-2.01006	-4.4877	-2.10974	-2.24475	-1.78853	-1.30957	-1.49805	-1.81954	-1.15591	-1.20119	-1.11901	-1.29452	-1.25357	-1.67781	1.44437	1.15208	1.04096	1.30179	1.50916	0.0883191	1.22745	1.93206	0.627374	0.142139	1.17669	0.914415	1.22271	1.0023	0.978893	-0.703773	-0.585512	-0.548725	-0.745653	-0.677236	-0.995078	-0.348196	-0.616434	-0.400604	-0.894804	-0.906344	-0.371503	-0.682339	-0.919207	-1.17971	1.74746
ENSMUSG00000046447	Camk2n1	G	-1.35993	-1.38632	-1.58337	-1.35739	-1.31831	-1.4633	-1.46641	-1.44633	-1.29784	-1.43677	-1.02403	-1.16792	-1.20331	-1.25807	-1.09606	-1.12926	1.14377	1.08199	1.0076	1.15943	1.2797	0.945008	1.18357	1.38516	0.867846	1.01675	0.945011	0.951589	1.36598	1.01388	1.12828	-0.00133889	0.022712	0.119041	-0.0615025	-0.0168634	-0.349763	0.221123	-0.113495	0.183757	0.178201	0.0507102	0.224984	-0.0872661	-0.0804369	-0.171611	1.96219
ENSMUSG00000044017	Adgrd1	G	-1.05357	-0.756287	-2.1782	-0.924229	-0.859704	-2.1945	-2.47926	-0.146033	-1.57074	-1.41049	-1.35637	-1.62176	-2.48681	-2.01087	-0.460351	-0.744033	0.911673	1.10136	0.961022	1.08976	1.27476	0.481387	0.603534	0.912535	-0.228774	0.776461	0.800812	1.1079	0.914197	0.128491	1.05671	-0.765771	-0.73574	-0.959091	-0.922375	-0.0394	-0.226807	0.367786	-1.45821	-0.660113	-0.278955	-0.767698	-0.94316	0.320492	-0.529274	-1.20753	2.12962
ENSMUSG00000050423	Ppp1r3g	G	-2.09824	-1.78547	-2.60129	-0.726263	-0.635167	-3.36829	-1.11346	-1.20618	-1.31477	-0.95236	-0.816337	-1.61895	-1.68268	-1.66824	-0.894679	-1.64488	1.26475	0.979577	0.599774	1.46094	1.36816	0.838544	1.10905	0.902193	1.23466	1.29536	0.638995	1.22291	1.23221	1.30343	1.1422	0.829875	0.457356	0.360668	0.846758	0.585423	0.751167	0.293151	0.515924	0.883421	0.844221	0.900263	0.442271	0.347299	0.488989	0.415651	1.10587
ENSMUSG00000032503	Arpp21	G	-1.54683	-1.63734	-1.48385	-1.92818	-1.51635	-1.64747	-1.71036	-1.16293	-1.58003	-1.6324	-1.55865	-1.5691	-1.51087	-1.51276	-1.52489	-1.56464	1.83283	2.02145	1.44852	1.67713	1.81844	1.21757	1.9868	1.85405	1.6422	1.44086	1.86315	1.61278	1.68444	1.70855	1.52773	-0.246631	-0.120434	0.0762745	0.0017117	-0.183779	-0.18235	0.295771	-0.255063	-0.0948224	0.0261654	-0.237982	-0.216891	-0.0615952	-0.26484	-0.279586	1.35699
ENSMUSG00000033805	Ephx4	G	-2.9717	-2.28379	-2.16552	-2.43475	-2.70362	-2.04754	-2.17204	-2.18657	-2.02048	-2.13397	-1.99355	-1.95032	-1.91175	-1.95474	-1.37287	-2.27463	0.754835	0.870285	0.43807	0.688012	0.521998	0.0485052	0.619837	0.568207	0.350656	0.112807	0.667192	0.364738	0.518488	0.546485	0.73084	0.682291	0.78872	1.00603	0.832223	0.807608	0.756945	0.658524	0.683366	0.779435	0.953391	0.752403	0.673283	0.579389	0.569117	0.775084	1.70618
ENSMUSG00000043811	Rtn4r	G	-1.81026	-1.70054	-2.75657	-2.87518	-1.76895	-2.18758	-2.55446	-2.25179	-2.39108	-2.12553	-2.5627	-2.71747	-2.80016	-2.6207	-1.79038	-2.30929	0.720189	0.586155	0.149454	0.674006	0.0868324	-0.255131	0.407792	0.240762	0.655751	0.0194454	0.818051	0.660486	0.755013	0.644249	0.454014	0.729812	0.573873	0.623719	0.811237	0.787203	0.987332	0.601218	0.897684	0.683225	0.725091	0.977209	0.503583	0.826918	0.934773	0.833524	1.06601
16019	NA	G	0.487606	0.0917378	-0.0834298	-0.45938	0.285949	-0.239652	0.178929	0.196478	-0.125579	0.0807857	-0.249674	0.0623707	-0.405422	-0.366164	-0.156511	0.0496511	-0.323106	-0.679839	-0.748131	-0.355063	-0.505299	-0.686627	-0.982939	-0.795793	-0.252973	-0.211666	-2.39374	-0.71703	-0.0427983	-0.730714	-0.398776	0.355412	0.106424	0.0357252	0.0649044	0.423505	-0.117281	0.227564	0.476818	0.381329	0.14275	0.409169	0.748027	-0.352831	0.175492	0.480353	2.2721
ENSMUSG00000050623	Catsperz	G	-1.81423	-0.699507	-1.72858	-1.62496	-1.5987	0.133653	-1.32838	-2.11535	-0.986854	-0.763198	-0.83435	-0.99877	-1.24427	-1.09427	-1.17864	-0.209841	0.194986	0.251418	0.554257	0.321364	0.104018	0.408469	0.757996	-0.136116	-0.0121202	-0.156504	1.05995	0.395108	0.20429	0.27064	0.958631	0.547892	0.0923976	0.322579	0.143834	0.678976	0.553148	-0.357106	0.507481	0.617599	0.199753	0.721305	0.80462	0.438611	0.688199	0.566372	1.93778
ENSMUSG00000030047	Arhgap25	G	-1.1515	-0.407536	-0.44597	-0.338087	-0.970549	-1.02871	-1.53579	-0.855216	-1.03647	-1.02159	-1.38391	-1.20267	-1.08309	-0.736433	-1.69017	-0.361428	-0.0621856	0.232004	-0.595976	-0.354229	-0.326672	0.0862596	-0.21997	-0.571399	-0.47213	0.139418	-0.853052	0.203647	0.623955	-0.126533	0.720214	0.349644	0.101093	-0.426852	0.107092	0.330626	0.135826	-0.0619512	0.210158	0.568317	0.310591	0.198805	-0.05934	0.223623	0.075089	0.240772	2.5507
ENSMUSG00000020178	Adora2a	G	-0.290941	-0.975209	-0.00378543	-1.35733	-0.527357	-0.449412	-1.29755	-3.87054	-1.03527	-0.98637	-2.1373	-2.28181	-1.39553	-1.75465	-1.50968	-1.15432	1.45077	2.38577	0.752309	0.0672528	2.04597	1.24103	1.37567	0.252484	2.58537	3.71976	0.107372	1.13249	2.45928	1.80255	2.02726	-0.532744	-0.50874	-0.31193	-0.300602	-0.678232	-0.921328	-1.11933	-0.76065	-0.634766	-0.34116	-0.420284	-1.02289	-0.944624	-0.527456	-1.60962	-0.652459
ENSMUSG00000022468	Endou	G	-2.68299	-1.72856	-0.792314	-1.96934	-0.267239	-2.04834	-1.00372	-1.0575	-0.953723	-0.994887	-1.80046	-1.32814	-1.09745	-1.36465	-0.130899	-1.09998	2.09122	2.94993	1.46329	2.22063	1.96669	0.535798	2.90491	1.54938	1.91464	1.4434	2.04339	2.45472	2.0696	1.98874	1.80284	-0.991689	-0.946272	-0.521409	-1.25607	-0.740161	-1.52972	0.128723	-0.732327	-0.752095	-0.781189	-0.738156	-0.855527	-0.872259	-0.97337	-0.984995	0.590134
ENSMUSG00000061462	Obscn	G	-1.10444	-1.06318	-2.18088	-2.49068	-0.857782	-1.29164	-1.25229	-0.802863	-1.77033	-1.83573	-2.16993	-1.36244	-1.70699	-1.14979	-1.63457	-1.43671	-0.206231	1.16313	0.876898	-0.165994	1.05196	0.23676	0.973079	0.410655	-0.164825	1.33662	-0.183492	0.771698	0.894728	1.07335	0.457278	0.95474	0.764823	1.15638	1.20946	1.22739	0.879223	0.32332	1.24581	1.36615	0.985636	0.98061	0.77235	0.827928	1.15416	0.774286	1.27643
ENSMUSG00000038418	Egr1	G	-1.37379	-1.06183	-1.75889	-1.8531	-1.52121	-1.40489	-1.24281	-1.9886	-1.26698	-0.967265	-1.49155	-1.14814	-1.09987	-1.90068	-0.933325	-1.26527	0.430395	0.748255	0.32303	0.702133	0.338673	0.051563	1.1109	0.0488228	1.36755	0.486092	0.845539	0.863021	0.976675	0.55151	0.762002	0.127402	0.338643	-0.0159057	-0.0779782	0.0593142	0.100902	0.0723434	-0.117275	0.395983	0.387248	0.00400192	0.378489	0.102015	0.202125	0.132798	2.05166
ENSMUSG00000079434	Neu2	G	-2.92646	-0.547924	-1.03206	-0.0446341	-0.256785	-0.902539	-0.353468	-0.667044	-0.539035	-0.686665	-0.67015	0.371388	-0.73029	-0.386281	-0.31969	-0.553892	1.1957	1.23173	-0.0578482	0.675411	-0.858267	0.218257	0.767862	1.19656	1.12787	0.355223	0.374269	0.82059	0.996442	-0.0169772	0.395348	-1.05205	-0.893159	-0.463434	-1.81193	-1.27787	-0.999945	-0.975465	-0.964713	-0.545136	-1.60071	-0.941708	-1.64529	-1.50429	-1.50412	-2.31939	2.01043
ENSMUSG00000028600	Podn	G	-3.20283	-1.53044	-1.82861	-0.154323	-1.01911	-0.621798	-1.88107	-3.45646	-1.91817	-1.8956	-2.16194	-1.86773	-1.89372	-0.871048	-0.706324	-2.4246	1.16383	1.12088	0.740065	1.22557	0.36053	1.12277	0.785189	1.19251	0.85694	0.246886	0.587473	1.20074	1.89118	1.3424	1.65968	-0.056605	0.585047	0.524934	0.331991	0.0387205	0.855514	0.57691	0.00324317	-0.171923	0.751198	-0.461463	0.76396	0.575549	-0.0612484	0.649404	1.38199
ENSMUSG00000019997	Ctgf	G	-2.08628	-1.96037	-1.71463	-3.42126	-1.97312	-1.54582	-1.64439	-1.28589	-1.64005	-1.81375	-1.36815	-1.94175	-1.6189	-0.723097	-1.96133	-1.46338	0.573244	1.21638	0.338558	1.57257	0.621154	1.46714	0.770836	0.92279	1.44126	0.545406	-0.0414501	1.15293	1.5692	0.839608	0.869936	-0.126955	-0.364247	0.212377	-0.585981	0.0693425	0.152679	0.605844	-0.149554	0.539388	0.168942	0.12684	-0.734122	0.080754	-0.527316	-0.0554037	1.54049
ENSMUSG00000023800	Tiam2	G	-1.80681	-1.69491	-1.64426	-1.82593	-1.78156	-1.69758	-1.61298	-1.03005	-1.56292	-1.58704	-1.61263	-1.47864	-1.52314	-1.69554	-1.61997	-1.99875	1.44342	1.45418	0.751087	1.10468	0.928242	0.80199	1.19677	1.0951	0.943971	0.81196	1.28839	1.06637	1.13754	1.22903	1.0362	0.24751	0.0920441	0.298724	0.0164797	0.22827	-0.0309763	0.420522	0.31959	0.296348	0.145137	0.338954	-0.0568808	-0.0795604	0.159711	0.137034	1.19636
ENSMUSG00000007682	Dio2	G	-2.29799	-2.4701	-2.39963	-1.9802	-2.09404	-1.74754	-1.70201	-1.45064	-1.5923	-1.88986	-1.38235	-2.1141	-1.64832	-1.79902	-1.77282	-2.14684	1.47484	1.06242	0.74987	0.817596	1.45012	1.25498	1.73062	1.32541	0.434244	0.695507	0.67301	1.18199	0.865797	0.406715	0.780439	0.536857	0.610649	0.612709	0.837066	0.658539	0.749771	0.720369	0.639193	0.764402	0.361447	0.514481	0.360797	0.48552	0.596557	0.474982	1.4781
ENSMUSG00000020000	Moxd1	G	-0.992414	-1.81522	-1.51462	-3.45239	-1.27497	-0.977257	-2.14012	-1.95343	-1.98746	-1.3241	-1.71986	-1.75555	-1.35111	-0.691476	-2.33551	-2.59273	1.76653	1.4065	2.14947	1.56395	1.69848	1.93125	1.6889	1.2527	1.08093	1.46968	1.77712	1.56347	1.53577	1.7371	1.80823	0.149994	0.0873263	0.670804	0.349356	0.69508	0.647193	0.732838	0.229562	0.67936	0.136779	0.31639	-0.0122722	0.452622	0.367434	0.538744	0.367362
ENSMUSG00000032511	Scn5a	H	2.95173	2.73692	2.80527	2.35531	3.12546	2.62407	2.678	2.57547	2.49256	2.5625	2.54767	2.51003	2.50269	2.63999	2.45688	2.39109	2.57565	3.06377	3.12222	3.10775	3.09326	3.0078	3.30108	2.96988	3.44252	2.78764	3.35823	3.2523	2.62069	2.85471	3.27504	-1.52894	-0.339892	-1.64264	-0.686379	-0.750897	-0.739343	-0.467877	-1.53869	-1.4982	-0.78316	-1.52608	-1.66527	-0.580262	-0.978223	-1.18246	-2.1639
ENSMUSG00000028004	Npy2r	H	1.70033	1.66636	1.91599	1.97537	1.40954	1.48794	1.65234	1.76172	1.90363	1.63311	1.82696	1.84702	2.02549	1.90953	1.67166	1.99055	1.02984	0.840428	1.74499	1.31164	1.46993	1.88986	1.83924	1.20282	1.0987	1.07807	1.83277	1.33946	1.13313	1.24627	1.22739	2.44753	2.70534	2.74213	2.93294	2.60107	2.68128	2.78358	2.77004	2.40483	2.16037	2.85772	2.62124	2.66014	2.78716	2.61109	-1.56139
ENSMUSG00000024647	Cbln2	H	1.93168	2.10282	2.02256	2.08919	1.97678	1.96794	1.76064	2.1448	1.96124	1.71695	1.9386	2.14918	2.02959	2.23211	2.22821	2.11156	-0.36769	0.834799	-0.120039	1.16617	1.04532	0.121237	0.916318	0.678109	1.05085	0.475806	0.342374	0.613626	0.327561	0.351526	0.350547	-0.460563	-0.260876	-0.577293	-0.554399	-0.314817	-0.289458	-0.480394	-0.324762	-0.45696	0.153775	-0.378994	-0.522652	-0.361506	-0.459607	-0.50724	2.45999
ENSMUSG00000041911	Dlx1	H	1.85248	1.44501	1.8835	1.2425	1.62758	1.45444	1.37631	1.19558	1.47817	1.34956	1.32933	1.7063	1.49673	1.5466	1.35421	1.70253	0.436666	0.362431	0.728609	0.710263	0.446229	1.05139	0.850754	1.44095	0.609197	1.04981	0.696327	1.06112	0.780863	0.732171	1.0796	0.314501	0.44074	0.665429	0.666343	0.287221	0.494756	0.675286	0.3312	0.369836	0.445379	0.345891	0.684827	0.56506	0.00428887	0.280336	0.744799
ENSMUSG00000025400	Tac2	H	2.84812	2.94355	3.06276	2.61957	3.09439	2.63459	2.83279	2.78801	2.92988	2.79002	2.6726	2.35032	2.71841	2.72968	2.32804	2.71562	1.97896	1.18004	1.61657	1.28495	1.711	1.40555	1.39332	1.05833	1.12164	1.73498	0.973681	1.8776	0.974129	1.26695	1.11588	-0.874831	-0.962565	-0.832722	-1.25903	-0.445249	-0.576471	-0.528351	-0.567517	-0.926716	-0.861951	-0.997957	-2.05428	-0.759152	-1.15852	-0.658577	0.491702
ENSMUSG00000068696	Gpr88	H	0.65198	0.454643	0.684818	0.497988	0.646232	0.905183	0.933739	0.632984	0.478328	0.680546	0.829166	0.908689	1.13612	0.596805	0.683788	0.607414	2.09293	2.6255	2.11198	1.87636	2.45678	1.70829	2.42404	1.92604	2.67296	3.13578	2.44316	2.30813	2.80676	2.28104	2.31177	-0.86852	-0.851147	-0.664736	-1.17199	-0.475935	-1.38124	-0.290038	-1.10099	-0.64183	-0.430654	-1.17917	-1.0104	-0.756085	-2.45121	-1.50969	1.77225
ENSMUSG00000061762	Tac1	H	2.35806	2.65052	2.56472	2.79863	2.48654	2.69821	2.48428	2.82953	2.78197	2.67144	2.69811	2.75422	2.79205	2.83082	2.64061	3.04299	1.37022	0.999953	1.24314	1.16382	1.49415	1.606	0.891332	0.27227	1.19786	1.94672	0.708993	1.16623	1.3001	1.22004	1.83928	-0.457325	-0.622464	0.171036	-0.173863	-0.159716	-0.168058	-0.391966	-0.693562	-0.50573	0.0800187	-0.315727	-0.374238	-0.283152	-0.531375	-0.109309	0.300353
ENSMUSG00000027400	Pdyn	H	2.44253	2.53951	2.147	2.57487	2.50995	2.21855	2.69516	2.57661	2.1923	2.29717	2.48828	2.05799	2.56227	2.20302	1.98803	2.22301	0.410971	1.21243	0.68446	0.940528	1.02694	0.746739	0.899032	0.555043	1.60776	1.97685	0.704615	1.02491	1.08069	0.794708	0.60493	0.571051	0.163209	-0.114404	-0.0741909	0.244872	0.0331671	-0.197564	0.372348	0.480755	0.203621	0.389157	0.327982	-0.134995	0.714713	0.35149	0.815986
ENSMUSG00000027568	Ntsr1	H	2.183	2.22623	2.07994	2.45091	2.18599	1.97387	2.20604	2.37231	2.24057	2.15715	2.19795	1.93746	1.88161	2.12793	1.98866	2.2704	1.57609	1.28524	1.63938	1.33797	1.23559	1.81307	1.33493	1.04038	1.49395	1.39098	1.47135	1.51025	0.936574	1.46932	1.22894	-0.0585256	-0.1075	-0.091277	-0.0240174	0.0917548	-0.284834	-0.218044	-0.389922	0.324577	0.209075	-0.0889187	-0.239765	0.0810169	-0.606106	0.0565739	0.348898
73040	NA	H	0.667091	0.515159	1.01838	0.878482	0.874831	0.674983	0.797686	0.745653	1.23273	1.13126	1.37598	1.53666	1.28243	1.423	1.22781	1.41468	2.06204	1.83935	2.12357	1.58872	2.2625	2.13666	1.95796	1.8419	1.37579	2.07129	1.3156	1.81705	1.65455	1.4494	1.90638	0.924179	1.0447	0.97899	1.12713	0.580594	0.679369	0.981242	0.616525	1.17257	1.10605	0.622092	1.13055	1.089	0.609996	1.03505	0.65181
ENSMUSG00000058897	Col25a1	H	1.87382	1.5743	1.81383	1.9675	1.6171	1.82393	1.81732	1.74164	1.82383	1.67273	1.78766	1.9534	1.93341	2.03198	1.97601	1.67389	1.25484	1.46087	1.50631	1.43885	1.61301	1.3558	1.64651	1.31636	1.52003	1.35902	2.13006	1.47715	1.22402	1.22572	1.26091	0.776778	1.18501	1.2561	1.04216	1.06042	0.979529	1.11405	0.87952	1.04822	0.85772	0.954776	0.904877	1.06278	0.837774	0.807303	0.265887
ENSMUSG00000030043	Tacr1	H	2.36721	2.23045	2.26829	2.23489	2.38029	2.32646	2.42938	2.0021	2.4009	2.3428	2.36595	2.48168	2.37938	2.44585	2.40279	2.18516	1.46417	1.45328	1.92308	2.1155	2.02962	2.06228	2.57408	1.37066	2.25126	2.29863	2.15396	2.02918	1.5403	1.3702	1.80433	-1.72126	-1.7182	-1.14784	-0.277414	-1.29738	-0.762295	-0.406884	-1.23459	-0.641246	-2.21368	-1.27253	-1.57782	-0.473682	-1.19243	-0.538345	-1.43065
ENSMUSG00000053093	Myh7	H	1.27509	1.3297	1.3773	0.830048	1.32255	1.43809	1.09248	1.01785	0.8355	1.40059	1.09629	1.08612	1.00399	1.15844	0.867439	0.94854	2.48146	1.59182	2.58375	2.05001	2.42844	2.49892	1.95006	1.91363	1.79109	2.46667	1.95433	2.19369	2.10226	2.36943	2.11244	-0.200683	-0.483686	-0.605848	0.0924228	-0.470265	0.160251	0.140767	-0.737051	-0.0322356	0.155759	-0.248581	-0.779446	-0.087796	-0.0622253	0.0986066	0.374017
ENSMUSG00000045763	Basp1	H	1.2321	1.08884	0.960025	0.599314	1.37613	0.959212	0.887449	0.8186	0.618174	0.613165	0.833834	0.707779	0.635965	0.702437	0.709734	0.682027	1.21528	1.03764	1.21418	1.39607	0.880381	0.929495	1.10241	0.920468	1.72467	1.43743	1.46903	1.09666	1.51852	1.34553	1.24617	0.742646	0.922448	0.908526	0.988006	0.6534	0.932831	0.956578	0.647654	1.08438	0.982759	1.00744	0.791552	0.827701	0.871777	0.949216	1.08632
ENSMUSG00000075334	Rprm	H	1.30713	0.810106	1.29997	0.608119	1.04345	0.850904	1.02683	1.49347	1.16452	1.13489	0.776217	0.774184	1.00588	1.03452	0.886028	1.17433	1.97698	1.81705	1.93695	2.19623	1.79687	1.673	1.73062	2.01403	1.89269	1.87479	2.36064	1.94368	1.97371	2.16332	1.8111	-0.134229	-0.0932518	0.101904	-0.0476447	-0.0352528	0.442738	0.00266045	-0.131227	0.161955	0.463005	0.345294	-0.783063	0.279311	-0.0449708	0.183342	0.851413
ENSMUSG00000023391	Dlx2	H	1.35554	1.69012	1.73761	2.11848	1.58862	1.54058	1.64453	0.984982	1.30695	1.13412	1.52753	1.17258	1.463	1.62733	1.24671	1.4146	0.19532	0.569393	0.949806	1.00085	0.566276	0.637709	0.38359	0.813481	1.29229	1.34351	0.645985	0.798608	1.17696	0.708135	1.0265	0.175321	0.0577623	0.215031	-0.403658	-0.0662967	0.0798705	0.316958	-0.435359	0.0503275	0.417868	-0.0700095	0.316891	0.129572	-0.171901	0.423051	0.143183
ENSMUSG00000028871	Rspo1	H	1.38906	2.33532	2.15063	2.00732	2.57287	1.88078	2.31662	2.0827	1.9271	2.02892	1.96069	2.05938	2.09591	2.02811	2.07635	1.96399	-0.112029	-0.784039	0.506633	0.495477	0.524822	0.398325	0.192041	-0.144402	-0.539648	0.780413	0.116771	0.274889	0.438453	0.0795717	0.587826	-1.46293	-2.17087	-1.37331	-0.680608	-2.09389	-1.72164	-1.7255	-1.2573	-1.47048	-1.91163	-1.88976	-1.6838	-0.964358	-1.21887	-1.79985	2.17891
ENSMUSG00000048905	4930539E08Rik	H	1.3113	1.10158	0.990286	0.539385	0.806926	0.541048	0.576001	0.597425	0.738974	0.614461	0.993256	0.814775	0.735011	1.03937	0.926833	1.01374	2.14682	1.76436	1.86611	1.90021	2.01921	2.02427	2.29559	2.5268	2.20215	1.97544	2.48708	1.92391	1.76517	1.88011	1.95687	-0.289464	-0.0661616	0.161728	0.338824	0.071614	0.37693	0.498211	0.210821	0.0887499	0.580461	-0.179796	0.0749011	-0.295387	-0.206559	0.0732616	0.916718
ENSMUSG00000048562	Sp8	H	0.887611	0.716414	0.44322	-0.468004	0.718388	0.952664	0.323989	0.0741545	0.625807	0.369092	0.630578	0.687254	0.165639	0.410556	0.492077	0.778167	-0.471659	0.155689	0.262358	0.825154	0.685524	0.18793	0.384691	-1.00479	0.642011	0.394523	-0.502229	0.516016	-0.0961028	-0.321773	0.118194	-0.484118	0.219702	-0.2146	-0.732852	-0.0433243	-0.453699	0.279362	-0.189361	-0.481601	-0.572413	-0.169788	0.290292	0.0119808	-0.134562	0.141031	0.185022
ENSMUSG00000029335	Bmp3	H	0.704636	0.461487	0.0255411	0.784332	0.589288	0.1012	0.140131	-0.516473	0.293642	0.684182	0.617702	0.586124	0.225092	0.632423	0.544069	0.919173	1.63459	2.75127	2.02658	2.45851	1.84588	1.70546	2.21086	2.26263	2.27553	1.39325	3.09865	2.0469	2.50457	2.38693	2.2999	-0.340731	-0.257445	-0.129481	-1.05325	-0.359664	-0.451607	0.190038	-0.363005	-0.213582	-0.777866	-0.432861	-1.07605	-0.200735	-0.872027	-0.241502	1.57963
ENSMUSG00000029878	Dbpht2	H	0.342781	0.424841	0.396797	0.6339	-0.0611669	0.437404	0.377094	0.374671	0.640408	0.398297	0.618092	0.871016	0.756372	0.656921	0.614737	0.67392	1.87149	1.90299	1.96892	1.87666	1.85658	1.90036	1.85587	1.89854	1.38341	1.46192	1.98985	1.64666	1.58943	1.87486	1.95166	0.330224	0.5562	0.576705	0.330019	0.700156	-0.201878	0.844281	0.586945	0.676953	0.498699	0.567423	0.498778	0.487377	0.456566	0.405735	1.16675
ENSMUSG00000047428	Dlk2	H	0.909638	1.10772	0.917208	0.394255	1.18271	0.785083	0.73288	0.494606	0.547027	0.835583	0.323957	0.320386	0.46637	0.372771	0.488203	0.311878	1.40825	1.19422	1.43937	1.33995	1.12	1.50876	0.963863	1.39178	1.65009	1.15063	1.03141	1.31722	1.31657	1.75396	1.54993	0.542905	0.58816	0.544033	0.33417	0.512946	0.633674	0.678497	0.59828	0.498515	0.518965	0.57578	0.717294	0.412814	0.694289	0.713594	0.997376
ENSMUSG00000021708	Rasgrf2	H	1.56404	1.49864	1.55381	1.65162	1.45952	1.69374	1.57823	1.61495	1.51423	1.57298	1.67601	1.81603	1.86542	1.71827	1.5909	1.63999	0.973087	1.17382	1.10262	1.045	1.06843	0.627118	1.21568	1.17658	0.946122	0.760113	1.38452	1.0247	1.07322	0.941051	0.958734	0.109539	0.188369	0.563785	0.213311	0.495245	0.150957	0.172337	0.428055	0.391023	0.104439	0.323672	-0.0388639	0.168665	0.32981	0.103532	1.09443
ENSMUSG00000060735	Rxfp3	H	2.08772	2.02065	2.16711	1.50232	2.55893	2.29213	1.96163	1.95586	1.94629	2.08401	1.92846	2.11333	1.81549	2.18935	1.90301	2.04472	1.97089	0.585424	1.60469	1.05901	1.3304	1.57324	1.23321	0.325919	0.607816	1.275	1.38418	0.975177	0.796854	1.36005	0.865318	0.520239	0.830418	0.830314	1.05531	0.705066	0.985399	1.46961	1.06827	0.91494	0.440976	0.545999	0.299655	1.08599	0.946681	0.643925	-0.589083
ENSMUSG00000067594	Krt77	H	1.30595	1.35765	1.15945	1.18443	1.00033	0.777022	0.927412	0.927349	0.705459	1.24138	0.812082	0.757264	1.08755	1.18149	0.844581	1.12403	2.41243	1.39458	2.3705	2.17694	1.76519	1.87126	2.03709	2.4561	1.75424	2.14479	2.01208	1.99883	1.43611	2.3061	2.08628	0.761364	0.75855	0.764176	0.931669	0.526468	0.94072	0.790307	0.317731	1.13456	0.768774	0.356667	0.310875	0.756073	0.370077	0.564785	-0.126693
ENSMUSG00000015843	Rxrg	H	1.53258	1.91596	2.09675	1.58528	1.67525	2.17379	1.80425	1.92513	1.76204	1.87498	1.80416	1.71062	1.80327	1.82752	1.71101	1.95136	1.79983	1.50228	1.99386	1.82625	2.03146	2.0859	1.87747	1.52823	2.27379	1.86832	2.29651	2.10655	1.92189	1.97031	1.74734	-0.496023	-0.287932	-0.422424	0.102194	-0.91125	0.210388	0.105248	-1.32693	0.211015	-0.000625513	-0.626223	-0.874465	0.390314	-0.690784	0.00886306	-0.761803
ENSMUSG00000015981	Stk32c	H	0.636557	0.693042	0.569035	0.175913	0.870399	0.553461	0.588813	0.318809	0.170789	0.556991	0.412813	0.415406	0.239614	0.300272	0.447264	0.239615	1.49286	1.43021	1.28007	1.55377	1.36561	0.964091	1.27626	1.40948	1.61649	1.41448	1.61585	1.53674	1.65182	1.61151	1.41136	0.380397	0.272526	0.326917	0.377331	0.398803	0.347412	0.372799	0.529048	0.503951	0.561951	0.588919	0.308371	0.28647	0.553526	0.517122	1.30782
ENSMUSG00000044071	Fam19a2	H	-0.169392	0.103745	0.206074	-0.0327787	-0.0956401	0.347501	-0.13138	0.150212	0.192929	-0.0368963	0.334275	0.3648	0.31087	0.247823	0.473168	0.416588	1.95938	2.38716	1.80728	2.04169	1.95261	0.998976	2.4245	2.13052	2.06291	1.421	2.46761	2.01128	1.90671	1.95594	1.7601	0.954266	1.07401	1.15763	0.897551	1.27735	0.743248	1.18445	1.14799	1.17935	1.0623	1.21224	1.07546	0.867892	0.908797	0.856238	0.743505
ENSMUSG00000031932	Gpr83	H	1.33632	1.48806	1.66094	1.49562	1.50889	1.69949	1.57356	1.9093	1.52846	1.58312	1.30492	1.31208	1.48181	1.40874	1.29092	1.47563	1.05859	1.27777	0.848464	1.18646	1.12337	1.31916	1.28543	0.707297	1.74876	1.31016	1.67392	1.22987	1.1305	1.62261	1.24488	0.17308	0.42992	0.400904	0.170006	0.458838	0.453143	0.525664	0.436189	0.422201	-0.0921552	0.455634	0.153057	0.313434	0.480144	0.294007	0.694898
ENSMUSG00000030898	Cckbr	H	-0.00754934	-0.0385566	-0.452582	-0.488677	0.383311	-0.25174	-0.126697	-0.41242	-0.3217	-0.169072	-0.679872	-0.0960703	-0.411524	-0.34199	-0.593083	-0.114711	1.79716	1.97251	1.74698	1.83006	1.7577	1.15675	1.85289	1.80021	1.72038	1.03756	1.92958	1.92981	1.8683	1.91957	1.64379	-0.693685	-0.613835	-0.332601	-0.836924	-0.553755	-0.617958	-0.12816	-0.88094	-0.467415	-0.456953	-0.820346	-0.978193	-0.649348	-0.840502	-0.57368	2.15041
ENSMUSG00000036131	Frmd7	H	-0.10622	0.0497331	-0.365438	0.776983	0.147014	-0.0716705	-0.196419	-0.133366	0.0674743	-0.0805712	0.495671	0.684123	0.252511	0.628586	0.420932	0.596294	-1.24078	-0.718288	-0.436389	-1.4901	-1.99182	0.454104	-1.04753	0.107625	-1.86132	-0.950426	-0.0927425	-0.503528	-0.500639	-0.776334	-0.562553	0.659878	0.982166	0.744636	0.951539	0.716877	0.74335	1.17926	0.651502	0.898778	0.719422	1.12381	0.803177	1.30686	0.919203	0.852389	-0.539077
ENSMUSG00000031837	Necab2	H	0.636798	0.759929	0.850207	0.461132	0.599278	0.5132	0.491354	0.792144	0.452572	0.665611	0.516236	0.341211	0.375391	0.321994	0.497618	0.318469	1.61823	1.43221	1.86894	1.92642	1.49595	1.58693	1.54145	1.49732	1.66048	1.85843	1.43228	1.68778	1.43326	1.77637	1.83779	0.942901	1.17993	1.27752	1.35977	1.04667	1.41242	1.38208	1.08155	1.22841	1.19122	1.16519	1.13725	1.35809	1.16396	1.08787	-0.167173
ENSMUSG00000043668	Tox3	H	1.20164	1.05071	0.997476	1.07162	1.15971	0.929721	0.802739	1.42752	0.824579	0.94942	1.15784	1.23529	1.21007	1.07918	1.35258	1.22169	1.45123	1.97593	1.58045	1.97072	1.75557	1.44266	2.14348	1.88439	1.33641	1.585	2.46814	1.96658	1.96472	1.96662	1.63754	0.169357	0.266471	0.615663	0.231047	-0.133668	0.304874	0.408147	0.00688979	0.226176	0.0958136	-0.0281335	-0.0630076	0.0604083	-0.158902	0.17812	0.458478
ENSMUSG00000038760	Trhr	H	1.67778	1.39117	1.69676	0.932087	1.02018	1.28426	1.27774	1.55355	1.72307	1.60471	1.89679	1.8573	1.72781	2.01782	1.93565	1.78797	2.18262	1.47585	2.46117	1.96363	1.83168	2.71496	1.81425	1.72143	0.743011	2.20957	2.0117	1.74769	1.83521	1.89684	2.31149	-0.520388	0.16066	0.955553	0.309129	0.17154	0.587042	1.10621	-0.204116	0.5981	0.022963	0.0923604	-0.317602	1.20997	-0.0775345	0.32319	-0.948519
ENSMUSG00000024112	Cacna1h	H	0.614649	0.770595	0.382593	0.814948	0.728762	0.760548	0.724792	0.63095	0.432695	0.579353	0.546842	0.329713	0.397906	0.429139	0.183639	0.151288	1.08026	0.834549	0.761335	0.820923	0.55713	0.85859	0.876105	0.498761	1.27	1.03331	1.01281	1.14628	0.694607	1.08358	1.06772	1.73197	1.83718	1.89232	1.77741	1.93995	1.92067	1.55545	2.00913	1.97147	1.94807	2.03958	1.74048	1.65432	2.13915	2.03978	-0.252417
ENSMUSG00000029123	Stk32b	H	2.48011	1.90279	2.24228	1.66228	2.23014	2.41306	2.12916	2.18884	2.1664	2.21367	2.21561	1.92017	2.01636	2.11478	1.99824	1.97824	1.31288	0.801159	1.74388	1.13038	1.6724	0.864396	1.20026	1.03874	1.39734	1.04749	1.25725	1.38005	0.977242	1.15489	0.835709	0.685569	0.899945	0.964904	1.03633	0.894388	0.753961	0.945059	0.854849	0.859622	0.272789	0.641171	0.126912	1.0614	0.98993	0.733913	-0.740128
ENSMUSG00000050164	Mchr1	H	-0.0098615	0.117188	0.665612	0.595051	0.557546	0.53296	0.232243	0.519179	0.213998	0.550543	0.567059	0.24164	0.358377	0.245713	0.388393	0.135405	1.44595	1.24379	0.8178	1.15626	0.972201	0.323863	1.25805	0.913859	1.20733	0.93368	1.16006	1.08362	1.21419	1.17922	0.881351	1.06419	0.834756	1.1412	1.26601	1.00595	1.39096	0.993242	0.964303	1.07226	1.35317	1.30831	1.06084	1.27419	1.20964	1.25	0.928958
ENSMUSG00000057182	Scn3a	H	1.64375	1.42888	1.62226	1.99631	1.3531	1.63405	1.35838	1.68154	1.57759	1.34286	1.41254	1.67912	1.70693	1.67963	1.57797	1.69907	0.959839	1.10605	0.906695	1.02466	0.886157	0.903602	0.922932	0.787928	0.920438	0.584813	1.12114	0.816627	0.820305	1.10261	0.961281	0.625259	0.996901	1.06461	0.921387	1.09456	0.557958	0.927698	0.977558	0.845841	0.793902	1.02903	0.679045	0.791306	0.946894	0.778264	0.170802
ENSMUSG00000046999	1110032F04Rik	H	0.609932	0.586029	0.418101	0.851452	0.701847	0.36866	0.446092	-0.574357	0.836251	0.575077	0.629798	0.799626	0.53512	0.763325	0.906605	0.619115	0.0237296	-0.0451591	-0.306839	0.556293	0.342851	-0.0809208	0.376131	-0.225675	0.535318	0.27365	0.731844	0.315638	0.792165	0.261745	0.377146	1.07088	1.00063	1.18795	0.908662	0.940441	1.09835	0.873977	0.81414	0.883744	1.62664	0.984551	0.843	0.900679	0.722956	1.16435	1.94848
ENSMUSG00000047904	Sstr2	H	0.29592	0.533208	0.569193	0.643849	0.210315	0.7371	0.557666	0.153012	0.471285	0.43704	0.523335	0.210557	0.429499	0.33168	0.236637	0.536083	1.89927	1.60071	1.59918	1.78258	1.2478	1.33752	1.62333	1.78235	1.72278	1.04415	1.91871	2.11338	1.75466	1.53034	1.12433	-0.167964	-0.347771	0.262792	0.413195	0.112642	0.530483	0.548565	0.524923	0.507479	-0.340162	0.335366	-0.584011	0.195896	0.263348	0.299886	1.46157
ENSMUSG00000036422	Pcdh8	H	0.906095	1.06882	0.588334	0.44601	1.04554	0.803772	0.695903	0.445959	0.419268	0.654894	0.725752	0.566846	0.645871	0.543092	0.49933	0.559292	1.90504	1.1946	1.87626	1.812	1.37395	1.52507	1.50373	1.22035	1.5401	1.59482	1.75049	1.63124	1.496	1.58603	1.41379	1.16041	1.23171	1.39814	1.54098	1.24715	1.56405	1.12111	1.45007	1.3897	1.28044	1.47359	1.31434	1.01112	1.43663	1.43986	-0.379545
ENSMUSG00000052726	Kcnt2	H	0.120121	0.173183	0.342792	0.425024	0.0865304	0.804265	0.243801	-0.148813	0.248237	0.345018	0.40604	0.325602	0.323903	0.598605	0.788205	0.74048	0.371265	0.817532	0.493724	0.425652	-0.267007	0.63462	0.742415	0.171369	0.157547	0.102871	0.822435	0.500452	0.947826	0.819606	0.938411	1.3583	1.77482	1.92994	1.43567	1.81966	1.55839	1.87346	1.82867	1.49005	1.36344	1.49318	1.38988	1.36181	1.62845	1.66033	1.72788
ENSMUSG00000040490	Lrfn2	H	0.924218	0.842698	0.754543	0.254713	0.775049	0.909668	0.669079	0.263201	0.505715	0.626215	0.65778	0.578172	0.747366	0.617548	0.539637	0.280974	1.16967	0.958469	1.16612	1.04773	1.05702	1.18996	0.960975	0.536419	1.47398	0.751181	1.28574	0.868935	1.2625	1.32995	1.18522	0.642436	0.730518	1.13009	1.01551	1.15559	1.09909	0.65838	1.17144	0.852212	0.753522	1.08637	0.559105	0.948752	1.09644	1.20439	0.66034
ENSMUSG00000029755	Dlx5	H	0.771297	0.962327	0.873673	1.47731	1.05816	1.02498	1.0098	0.756981	0.749897	0.673738	0.814833	0.692527	0.645685	0.929151	0.638114	0.438909	0.959342	0.0393753	0.717884	0.650558	1.0573	1.10302	1.21883	-0.180032	1.64282	1.13136	0.547294	0.314343	0.950754	0.366222	0.910328	-0.103759	0.517794	0.859671	0.208187	-0.537311	0.564154	0.585999	-0.384103	0.510404	0.805353	0.0849537	0.148972	0.473886	-0.102412	0.234893	0.403361
ENSMUSG00000044912	Syt16	H	0.0726882	0.177552	0.20641	0.028461	-0.114829	0.0928247	0.0454707	-0.225147	0.107941	0.1222	0.087331	0.261843	0.097024	0.189571	0.215114	0.10496	1.4004	1.23567	1.31663	1.36568	1.28791	1.24103	1.45821	1.15771	0.9848	1.25326	1.50026	1.11451	1.48766	1.3393	1.37598	0.644319	0.704372	0.841022	0.743925	0.965138	0.738168	0.694147	0.779602	0.849817	0.851069	0.875502	0.440105	0.863826	0.640292	0.87042	1.56429
ENSMUSG00000021337	Scgn	H	0.84471	1.21616	1.02752	-0.0167527	1.23176	0.53466	1.0957	0.964493	0.788724	0.962539	0.528074	1.12826	1.14663	1.33693	1.1809	0.808698	-0.412157	-0.337924	0.141397	-0.59894	0.0909939	-1.70656	-0.311354	-0.76155	-0.147425	-0.272756	-0.979413	0.36242	-1.33133	-1.03862	-1.64318	-0.218857	-0.467648	0.198195	-0.162517	0.0305544	-0.538706	0.0876389	0.446315	-0.694665	0.0860082	-0.277966	-0.260008	-0.0128914	-0.0249753	0.324108	-1.92078
ENSMUSG00000033063	Cntnap3	H	1.08328	1.13907	0.366169	0.0385217	0.536739	0.523116	0.692245	0.624522	0.73676	0.578137	0.74752	0.92877	0.673892	0.740267	0.469814	0.936975	1.82122	0.851351	1.69717	1.61132	0.909309	1.44851	1.6315	1.11849	0.995527	1.23566	1.32115	1.54203	1.18547	0.969304	1.31239	0.19999	1.02381	1.20221	0.549054	0.834976	0.670967	1.11467	0.49955	1.15103	1.06276	0.292151	0.748466	0.900703	-0.123841	0.951212	0.86308
ENSMUSG00000067578	Cbln4	H	1.97919	1.92794	1.88264	1.60138	1.74875	1.79184	1.69776	1.95299	1.68441	1.64985	1.96304	1.99543	1.89004	1.82235	2.13788	2.02301	-0.653455	-0.204552	0.163233	-0.226921	-0.141317	0.42071	0.299555	-0.796671	0.339399	0.756874	0.213354	0.0914804	-0.12409	-0.016053	0.228325	-0.456805	-0.424779	0.269148	-0.194985	0.241697	-0.43008	0.662615	-0.430811	0.512312	0.154839	-0.324913	-0.24577	0.052094	-0.97026	-0.542332	1.71051
ENSMUSG00000029754	Dlx6	H	1.6312	1.51071	1.65287	1.34031	1.36252	1.54503	1.33037	1.54998	0.925903	1.1994	1.20162	1.33321	1.00254	1.21127	0.798383	0.777489	-0.0372552	1.04713	1.19932	1.15182	1.69503	1.06783	0.653345	1.16523	0.585841	0.928358	0.978619	0.621665	0.878439	1.08146	0.951399	-0.677845	0.0238215	0.22874	-0.217901	-0.33791	-0.26856	-0.228654	-0.215632	0.168306	-0.338678	-0.355695	0.107037	0.222442	-0.0360769	0.230649	0.0273983
ENSMUSG00000049583	Grm5	H	0.115053	0.234126	0.260786	0.547052	0.167147	0.46453	0.218118	0.183054	0.438007	0.0893489	0.340197	0.745875	0.509828	0.607665	0.564559	0.566853	1.13595	1.22871	1.34952	1.14991	1.11665	1.15765	1.31238	1.10224	0.947115	1.01969	1.46914	0.889051	1.18849	0.969716	1.14745	1.20432	1.68542	1.77738	1.70381	1.68933	1.4334	1.70703	1.46581	1.56128	1.54085	1.50732	1.40903	1.6005	1.38851	1.48515	0.747191
ENSMUSG00000021478	Drd1	H	0.0986247	-0.0484463	0.125678	0.831504	0.0988689	0.178996	0.125445	-0.277266	0.612283	0.305313	0.136425	0.0926311	0.517248	0.598307	0.340532	0.496524	2.03182	2.25542	1.595	1.82238	2.41082	1.41487	2.19196	1.54371	2.43775	2.04088	2.42773	1.8488	1.98045	1.97923	1.72723	-0.142219	0.0509983	0.219106	-0.200392	0.190781	-0.150378	0.587095	-0.0823531	0.080911	0.154505	-0.139547	0.0687939	-0.120207	-0.163449	0.290874	0.961717
319752	NA	H	1.16217	0.891209	1.24802	1.634	1.11885	1.07559	0.836429	1.11163	1.22963	0.909305	1.25613	1.55267	1.37733	1.49387	1.44278	1.64768	0.666729	0.983075	1.12082	0.877125	1.13814	1.31523	1.18659	0.850215	0.914619	0.903238	1.21838	0.780286	1.05283	0.950328	0.950808	0.125815	0.440202	0.616874	0.354174	0.486577	-0.00933134	0.62367	0.152503	0.172907	0.168875	0.303774	0.317064	0.48166	0.231515	0.219688	1.45387
ENSMUSG00000034686	Prr7	H	0.416264	0.253396	-0.185412	-0.0368749	0.605314	0.347372	0.0723962	0.17267	-0.491152	-0.135836	-0.0809006	-0.530039	-0.050445	-0.259797	-0.240659	-0.15877	1.28151	1.1671	1.24959	1.63218	0.903133	0.953695	1.01905	1.0632	1.68208	1.4564	1.48384	1.3764	1.53774	1.43357	1.4087	1.00043	1.05064	1.0904	1.12028	0.915076	1.14087	1.01625	1.00693	1.09453	1.34341	1.40927	0.810025	0.931979	0.960776	1.1777	0.738159
ENSMUSG00000058400	Qrfpr	H	1.46855	1.85686	1.50775	1.65011	1.68757	1.71724	0.962399	1.01896	1.04252	1.30222	1.17539	1.91435	1.67008	1.53103	1.47004	1.74745	1.72211	1.58109	1.20497	2.01255	1.73472	0.919512	1.93805	1.61993	1.78984	0.583794	2.30342	1.6356	1.65413	1.15817	1.4034	-0.459668	-0.832749	-0.309711	-0.719352	-0.936436	-0.497349	0.64257	-0.838739	-0.198065	-0.536961	-0.722617	-0.953082	-0.364504	-0.539196	-1.12624	0.281122
ENSMUSG00000028197	Col24a1	H	0.529494	0.925511	-0.106259	-0.00916742	0.262618	0.0439338	0.586138	0.516714	1.01869	0.710685	0.722407	0.262851	1.13456	-0.134787	0.614339	-1.19765	0.494145	0.220697	1.08908	-0.541225	0.808326	1.44666	0.907271	1.03075	1.87223	0.328255	0.816722	0.937392	1.20119	1.61698	1.09804	-0.857566	-1.53691	-1.6601	-1.60189	-0.605599	-1.11547	-0.819001	-1.51413	-1.38041	-0.886765	-1.93199	-1.16665	-2.51368	-1.79329	-1.94136	2.40602
ENSMUSG00000048988	Elfn1	H	0.442799	0.847215	0.809214	0.8665	0.931551	0.745895	0.897973	0.816634	0.643085	0.875349	0.825315	0.734693	0.766893	0.804348	0.533879	0.902165	1.31934	1.35531	1.41679	1.35404	1.47823	1.09974	1.37681	0.84426	1.74798	1.68112	1.83518	1.46822	1.22323	1.41237	1.30741	0.475047	0.576348	0.634028	0.655169	0.57535	0.922661	0.825806	0.586238	0.745415	0.701418	0.553352	0.527502	0.586528	0.698123	0.454826	0.546822
ENSMUSG00000020173	Cobl	H	0.561834	0.596985	0.75339	0.746133	0.750797	0.726218	0.648984	0.721967	0.625674	0.759407	0.681693	0.78496	0.660309	0.851823	0.684032	0.652089	1.39494	1.61187	1.42869	1.36836	1.34798	0.999852	1.4585	1.24965	1.27446	1.05269	1.74296	1.29424	1.49958	1.17558	1.13767	-0.891403	-0.602508	-0.571055	-0.787938	-0.317474	-0.560486	-0.254056	-0.76747	-0.502175	-0.613172	-1.03943	-0.805261	-0.736331	-0.992384	-0.913135	1.99951
ENSMUSG00000045648	Vwc2l	H	1.86548	1.63202	1.92303	1.96326	1.78844	2.064	1.77723	1.84656	1.86036	1.63687	2.14549	1.9569	1.88829	2.02292	2.03819	2.12346	-0.139533	0.632619	0.520637	0.454856	0.625257	0.720471	1.0321	0.556496	0.709082	0.626536	1.10469	0.136896	0.63007	0.242245	0.27824	0.85318	1.03979	1.04906	0.274718	1.31042	0.358653	0.487179	0.404311	0.53652	0.885339	0.781873	0.724295	0.592289	0.161658	0.185395	0.385696
100046763	NA	H	0.772117	-0.233577	-0.145886	-0.479889	0.5465	0.421353	-0.11001	0.367427	0.437386	0.617545	-0.419291	0.325564	-0.0372169	-0.159972	0.409819	0.25485	1.83015	2.42095	1.63846	1.5354	1.48886	1.34025	2.0271	1.85099	1.83717	1.09675	2.04595	1.8155	1.91679	1.62495	2.04908	-0.296414	0.440791	-0.140383	-0.577011	-0.192074	0.309785	0.496529	0.357547	0.302495	-0.0545031	-0.225756	-0.0367622	-0.328849	-0.262395	0.606342	1.37219
ENSMUSG00000058152	Chsy3	H	0.843053	0.41961	-0.0221822	0.021239	0.56442	0.723684	0.158587	0.982737	0.538385	0.365979	0.0280614	0.708027	0.609321	0.646311	0.541899	0.185048	0.72306	1.05642	1.25047	1.40811	0.823355	0.788685	1.16498	0.506222	0.90455	0.894899	1.30058	0.64227	1.20904	1.26829	1.02412	0.341744	0.734956	0.276281	0.0467074	0.603784	0.232794	0.546322	0.310357	0.392432	0.788828	0.35326	0.322618	0.225924	0.265955	0.255438	1.70697
ENSMUSG00000022577	Ly6h	H	1.47513	1.33654	1.45134	1.06184	1.57811	1.29093	1.19178	1.14513	1.035	1.06918	1.17147	0.985049	1.1195	1.03364	1.03771	1.16115	1.6212	0.855507	1.45777	1.40297	1.1494	1.55496	0.883291	1.11658	1.45706	1.60078	1.22059	1.27884	1.33065	1.44435	1.50017	0.333773	0.51226	0.512109	0.695342	0.3833	0.733712	0.665204	0.136214	0.710381	0.71798	0.610553	0.0785407	0.553641	0.374455	0.578405	-0.0403055
78603	NA	H	-0.779195	0.660308	0.568984	0.60823	0.096183	0.478926	0.409636	1.14959	0.510708	0.00230625	0.655189	-0.00732372	0.46679	0.250597	0.721684	0.998525	1.35211	1.59082	1.45602	1.73571	1.46258	1.18948	0.901832	1.83675	0.778361	0.792358	1.2969	1.33728	1.34679	1.01315	1.41017	-0.779327	-0.0755068	0.414456	0.106101	0.121726	-0.146214	0.037754	-0.689265	0.0034847	0.285791	-0.190587	0.0909875	0.167924	-0.329118	0.306711	1.58038
ENSMUSG00000039706	Ldb2	H	0.682523	0.514568	0.8116	0.620008	0.331013	0.737372	0.654455	0.18477	0.49288	0.55654	0.385644	0.750299	0.778151	0.629749	0.75295	0.78729	0.596343	0.796345	1.14806	0.757519	0.645823	1.04266	0.878315	0.563868	0.736422	1.00137	1.31822	0.59161	1.09897	0.827212	0.735015	0.717802	0.850676	0.696905	0.787083	0.767456	0.719662	0.804159	0.394816	0.720304	1.1256	0.570151	0.344533	0.788977	0.473944	0.510669	1.53433
ENSMUSG00000041380	Htr2c	H	1.52064	1.43745	1.42128	1.76156	1.41108	1.31413	1.22456	1.43767	1.68702	1.45911	1.62582	1.93309	1.61397	1.7579	1.84838	1.71958	1.7894	1.79865	2.00777	1.8558	1.86133	1.58706	1.903	1.2804	1.80349	1.84098	2.35787	1.79997	1.81309	1.75489	1.66551	-0.211789	0.120024	0.282753	0.203631	0.54048	1.28471	0.329788	-0.289413	0.173871	0.384364	-0.0780842	0.993004	0.685647	-0.235795	-0.1777	-0.966554
ENSMUSG00000073530	Pappa2	H	0.577718	0.138717	-0.0954522	-0.321325	0.130971	0.631245	0.537637	0.21628	0.167759	0.430587	0.401681	0.208187	0.172675	0.342381	0.382351	0.122401	1.88094	3.04468	2.94931	2.57918	2.67531	1.91922	3.62884	2.43408	2.92422	2.09595	3.98699	2.60567	2.43992	2.47448	1.61562	-0.197553	-0.961398	-0.298351	-0.405441	-0.447898	0.139323	0.580534	0.335177	0.512387	0.273005	-0.0818529	-1.22106	-0.0423362	-0.706979	-0.292679	0.355225
74284	NA	H	0.454412	0.594094	0.815013	1.067	0.499043	0.921815	0.769387	0.63033	0.61725	0.818646	0.513052	0.956562	0.898111	0.391598	0.77558	0.874933	1.70059	1.93371	1.81369	1.8601	1.33907	1.62493	1.63265	1.65243	1.12467	0.872801	1.97616	1.59906	1.49584	1.73315	1.51555	0.489012	0.80116	0.566388	0.286501	0.69949	0.353618	0.40473	0.716888	0.420818	0.355376	0.4237	0.526715	0.708743	0.541295	0.73835	0.568417
ENSMUSG00000042401	Crtac1	H	0.531876	0.529973	0.506306	0.154028	0.530859	0.333219	0.396975	0.155851	0.420912	0.38184	0.210573	0.217764	0.33506	0.175446	0.16673	0.0677694	1.06035	1.12343	0.977169	1.06789	0.79221	0.541396	0.922955	0.474063	0.980854	0.720298	1.29431	1.03631	0.897888	1.05921	0.924047	1.06254	1.23952	1.27494	1.49296	1.26177	1.53592	1.35767	1.10949	1.35383	1.32799	1.28629	0.857472	1.47912	1.31581	1.17938	0.601375
ENSMUSG00000026414	Tnnt2	H	0.581873	0.802944	1.46321	-0.16711	1.36454	-0.307029	0.760606	0.574124	0.612168	0.499125	0.627254	0.494414	0.32784	0.238561	0.812542	0.331012	1.71155	1.07334	1.16334	0.931341	1.45966	1.56754	1.71658	1.6849	1.34569	1.5472	1.77235	1.42096	1.27714	1.81393	1.49116	-0.268799	-0.412793	-0.366638	-1.27746	-0.150032	-1.32341	0.0822008	-0.0158047	-0.492383	-0.35783	-0.587796	-0.298652	-0.713886	-0.258119	-0.788854	1.5297
ENSMUSG00000044770	Scml4	H	2.06216	1.7664	1.88471	1.53399	1.72613	1.53648	1.64618	1.34867	2.04308	1.83443	2.01389	1.94218	1.86495	2.01756	1.56764	1.68608	1.566	1.25335	1.26394	1.04374	1.33688	1.39492	1.22087	1.50919	1.28631	0.730872	1.71197	1.41085	1.34001	0.917292	1.46861	0.266782	0.183212	0.898345	0.597981	0.144411	0.395788	0.562715	0.33372	0.655401	0.247743	0.31704	-0.764184	0.583383	0.564727	0.857338	-0.356263
ENSMUSG00000062372	Otof	H	1.291	1.21153	0.862584	1.08794	1.0254	1.25554	0.958563	0.985549	0.981116	0.861203	0.587258	0.895105	0.744164	0.708292	0.733235	0.733062	2.77996	2.08085	2.68787	2.08429	2.24826	2.73855	2.0307	2.14699	2.63146	2.39122	2.43799	2.30332	2.12669	2.7489	2.67292	-1.41043	-1.34851	-1.28086	-1.48605	-1.53364	-1.34727	-0.786478	-1.78876	-1.45557	-1.67864	-1.58203	-1.88139	-1.01883	-1.51442	-1.1334	0.265205
ENSMUSG00000051048	P4ha3	H	1.92514	1.98168	1.66059	1.10792	1.9431	1.66533	1.5876	1.1451	1.54185	1.7845	1.54158	1.6091	1.67711	1.68908	1.51721	1.70055	0.727971	1.16472	1.26729	1.19791	1.73364	1.834	1.30142	1.57941	1.39801	1.84813	0.497193	1.43515	1.7115	1.21631	1.4909	-0.455712	-0.608384	-0.461381	-0.353826	-0.485971	-0.5855	-0.778564	-0.128102	0.10292	-0.0741539	-0.629871	-0.336343	-0.461977	-0.102997	-0.528616	0.247571
ENSMUSG00000029334	Prkg2	H	0.463859	0.713661	0.33434	1.04543	0.339922	0.492013	0.63608	0.366644	0.680716	0.465914	0.880778	0.915134	0.842782	0.818955	1.13146	0.556084	2.15368	1.80441	2.39293	2.05164	2.57756	2.33324	2.21653	2.30688	1.24721	1.80151	1.74657	1.98632	1.73765	1.95619	2.04751	-1.02644	-1.27467	-0.599717	-0.851991	-0.822445	-1.32766	-0.164223	-1.44486	-0.505443	-1.21232	-1.76357	-0.630852	-0.429245	-1.18823	-1.21249	0.836412
ENSMUSG00000049796	Crh	H	0.111586	1.19323	0.121853	-0.81379	1.07653	0.429176	0.267814	-0.71084	0.829785	0.0849903	0.949207	0.822273	0.356431	0.460435	0.77928	0.762998	0.894782	1.37849	1.16902	1.3027	0.899638	1.00713	1.07607	0.378472	1.16076	1.36891	0.860186	1.12589	0.743332	0.696004	0.703391	-0.584416	-0.248826	-0.370449	-0.63392	-0.695261	-0.0791207	-0.0773092	-0.766915	0.34864	0.164865	-0.0997436	-0.111871	-0.429141	-0.76067	-0.888005	1.54953
ENSMUSG00000026259	Ngef	H	-0.15751	0.137045	0.0250319	-0.22987	0.206939	-0.191585	0.0346547	0.048919	-0.249115	-0.0272876	-0.165053	-0.326292	-0.143934	-0.135234	-0.322109	-0.220638	1.19367	1.30507	1.01083	1.21903	1.06383	0.789586	1.28478	1.06341	1.35048	1.21949	1.29878	1.2862	1.44725	1.24413	1.01433	0.0327282	0.0672728	-0.104455	-0.128272	0.157412	0.153596	-0.0185346	0.161927	-0.00489873	0.353666	0.0835484	-0.294505	0.05272	0.0732539	0.168293	1.82504
ENSMUSG00000063446	Plppr1	H	1.21073	1.28215	1.59947	1.55498	1.32196	1.28902	1.04985	1.21678	1.36133	1.26855	1.47148	1.51445	1.27896	1.39998	1.13565	1.38152	1.51307	0.981167	1.76544	1.12176	1.45591	1.52626	1.29489	1.08468	1.35538	1.57019	1.36986	1.10168	1.37179	1.24354	1.24334	0.139982	0.769725	0.70632	0.431491	0.206001	0.368564	1.17365	0.23164	0.678709	0.588697	0.200402	0.498678	0.577859	0.221809	0.609793	-0.445473
ENSMUSG00000058420	Syt17	H	0.145732	0.101203	-0.0799742	-0.0252358	0.169566	-0.126185	0.187356	-0.148577	-0.1142	-0.0127197	-0.0923279	-0.0947362	-0.00795526	0.061558	0.091951	0.0658392	1.71147	1.68383	1.56841	1.7219	1.4157	0.95963	1.81163	1.44535	1.17452	0.661912	1.83762	1.50174	1.63119	1.59374	1.21556	1.11597	1.33895	1.4363	1.7547	1.35542	1.70691	1.31926	1.37414	1.36139	1.36897	1.34535	0.647949	1.56267	1.43853	1.50608	0.166084
100042178	NA	H	-0.204251	-0.027412	-0.184174	0.0346478	0.239698	0.188295	0.0449357	-0.168796	0.164881	-0.139391	-0.135336	0.132691	0.105007	0.276579	-0.253455	0.0202867	1.71273	1.41132	1.61153	1.16754	1.63564	1.63608	1.25712	1.50288	1.17748	1.68434	0.548017	1.11191	1.21874	1.01851	1.25835	1.06572	1.31633	0.983223	1.34148	1.07408	1.44338	1.24447	1.17274	1.28686	1.3152	0.870202	1.6566	1.45286	1.1782	1.22041	0.35922
ENSMUSG00000043659	Npsr1	H	1.23298	1.59314	2.13755	0.262586	1.42992	1.52685	1.91207	0.407955	1.73624	1.63987	1.80522	1.66315	1.5499	1.87879	2.08943	1.94271	1.23856	1.57538	1.74214	0.927624	1.50412	1.25785	2.05508	1.53059	1.75558	0.972041	2.3098	1.60818	1.43719	1.20494	1.45956	-0.733789	-0.00533388	0.0554455	-1.2235	-0.178648	0.0262821	-1.16739	0.0348322	-1.03481	-0.130968	0.0561358	-0.049677	-0.582413	-0.765871	-1.02422	-0.125864
ENSMUSG00000030223	Ptpro	H	1.36321	1.64032	1.75415	1.55914	1.49128	1.563	1.62747	1.73985	1.64206	1.64137	1.61817	1.58545	1.67769	1.6811	1.60262	1.61441	0.960853	1.12638	1.28588	1.13099	0.898054	0.867762	1.1912	0.993449	1.01462	0.847138	1.3203	1.08123	0.771089	1.06471	0.918787	-0.0578792	-0.0860892	0.0140423	-0.0501707	0.232864	-0.186664	-0.234482	0.188551	-0.002775	-0.113167	0.00833407	-0.154698	-0.0578284	0.115265	-0.0394065	-1.42164
ENSMUSG00000050967	Creg2	H	0.115058	0.137238	0.309379	0.335458	-0.130395	0.123421	0.00358106	-0.0319632	0.344362	0.24929	0.311644	0.595688	0.290288	0.31033	0.516174	0.472024	1.13912	1.10942	1.06232	1.02531	0.901392	0.576716	1.26376	0.843384	0.875818	0.721869	1.49643	0.870219	0.961204	0.97339	0.765164	1.30933	1.43239	1.5129	1.60386	1.62804	1.41588	1.22415	1.63452	1.51729	1.16184	1.51784	1.32473	1.34538	1.52822	1.58591	0.912699
ENSMUSG00000050069	Grem2	H	1.60185	1.40248	1.37234	1.10722	1.38385	1.47265	1.26008	1.21517	1.41438	1.40727	1.44038	1.70409	1.48743	1.52941	1.66619	1.68863	1.16177	1.61125	1.23327	1.51865	1.3795	1.12142	1.64509	1.09258	1.22007	1.08344	1.75989	1.46705	1.33855	1.37896	1.30845	-0.193657	-0.221135	0.249835	0.272646	0.110343	0.102135	0.364365	-0.0924651	0.135482	0.0590271	0.156862	-0.487104	0.429944	-0.140627	0.140628	0.46789
ENSMUSG00000019027	Dnah1	H	2.26478	2.36978	2.28649	2.49091	2.40677	2.3702	2.38197	2.17085	2.05977	2.2889	2.09999	2.00842	2.20989	2.04765	1.96064	1.94946	1.00065	0.347562	0.661106	0.374724	0.719552	1.21398	0.306828	0.439925	0.598968	1.24479	0.615529	1.04143	0.522313	0.903079	0.700991	-0.305025	-0.0434254	-0.16928	-0.515701	-0.184198	0.303909	0.208655	-0.258421	0.120131	0.0103154	-0.33528	-0.321077	0.074589	0.0856564	0.167901	-0.436238
ENSMUSG00000044014	Npy5r	H	1.45756	0.391174	0.325928	0.712494	0.596432	1.06576	1.36204	-0.0596497	1.06478	0.923686	1.14531	0.800287	1.38092	0.869597	1.34829	1.07983	-0.0651245	0.656121	-0.139396	0.306834	0.292104	-0.0462963	-0.994974	0.883266	0.638254	0.23837	0.613376	0.148071	0.429788	0.0906798	0.451972	0.809855	1.50454	1.31229	1.55266	1.32315	1.25697	1.24145	1.35012	1.45676	1.53008	1.56295	1.29022	1.29954	1.09359	1.18013	0.860913
ENSMUSG00000034009	Rxfp1	H	0.208547	0.0619362	-0.732671	-0.72423	0.461781	-0.536389	0.456882	1.23534	0.776036	0.619288	0.319838	0.541105	0.87026	0.525616	0.83853	0.494919	0.504551	0.787144	0.395252	0.603722	-0.203688	0.285364	-0.289435	0.174392	0.443729	-0.161085	0.825819	1.03451	0.426218	1.20955	1.2972	1.40731	1.73229	1.24787	1.255	1.20309	0.481599	1.38695	1.07479	1.21354	1.2615	0.509961	0.811989	0.912778	0.639883	-0.225777	1.75391
ENSMUSG00000040125	Gpr26	H	-0.379687	-0.172261	0.165042	-0.216265	0.193541	0.30368	0.0561094	-0.176393	-0.15576	0.211733	-0.119467	-0.132328	0.239088	0.0803204	0.0435004	0.242427	1.56695	1.87561	1.35122	1.46824	1.18322	0.460236	1.47143	0.997049	1.50944	1.04994	1.74485	1.58048	1.58872	1.54378	1.4841	0.690865	1.04244	1.20021	1.13475	1.11929	1.19748	0.899109	1.13417	1.00886	0.6258	0.690993	0.696975	1.01239	0.804338	1.05916	1.10646
ENSMUSG00000027971	Ndst4	H	0.982202	0.82509	1.13494	1.49683	0.929515	0.581822	0.818428	1.14908	1.31755	1.12395	1.23765	1.32882	1.26489	1.34338	1.39717	1.75832	1.15491	1.3515	1.25811	1.00676	1.08057	0.329423	1.55688	1.42021	1.15361	1.28221	1.76188	1.09304	1.28239	1.24991	0.929322	1.40807	1.79676	1.42647	1.03513	1.80657	1.3765	1.22264	1.4387	1.30327	1.66966	1.5451	1.18233	1.45161	1.11819	1.79101	-2.28857
ENSMUSG00000004961	Syt5	H	0.943493	0.981394	0.828389	0.758356	1.007	0.797208	0.683612	0.615391	0.665994	0.799014	0.739591	0.776065	0.641842	0.69899	0.592777	0.714343	1.05086	0.99266	1.07247	1.18196	1.06036	1.06651	1.19113	0.791998	1.40677	1.04703	1.24145	1.12461	1.02534	1.19801	1.07698	0.37274	0.354822	0.354097	0.399637	0.460866	0.455998	0.308035	0.423873	0.452107	0.575645	0.439526	0.158146	0.34366	0.405962	0.556675	0.740088
ENSMUSG00000052374	Actn2	H	0.669216	0.00881549	0.0925041	-0.368464	-0.123383	-0.26641	-0.029124	0.729011	0.00658938	0.510074	0.111109	-0.18787	0.113586	-0.112752	-0.0193199	0.106659	0.424094	1.47813	0.723914	0.87616	1.05012	1.14747	0.972437	1.61946	0.976401	1.37773	1.37799	1.13338	0.972271	1.39321	0.915895	0.486293	1.02709	0.911425	1.13448	1.12076	1.39562	0.643747	1.07528	0.966934	0.347867	0.966412	0.851939	1.01143	1.19559	1.25239	0.210186
ENSMUSG00000034997	Htr2a	H	0.382635	0.848339	0.828806	0.598916	0.994773	1.30929	1.05122	1.07681	1.05569	0.983125	0.98773	0.946629	1.01711	0.997289	0.94507	0.948748	0.493281	1.66254	0.736791	0.830204	0.737175	0.0185346	0.882479	0.482484	0.83365	0.627587	1.63082	0.957817	1.57672	0.973182	0.603432	0.161256	0.128581	0.359153	0.418291	0.610837	0.521285	0.768765	0.237055	0.632323	0.291992	0.536954	-0.517871	0.637661	0.0960408	0.785143	1.20628
ENSMUSG00000049112	Oxtr	H	0.651608	0.592341	0.597466	0.850835	0.267018	0.342569	0.263513	0.849844	0.573832	0.915562	0.839984	0.58564	0.918365	0.659324	0.300909	0.821672	2.46361	1.92766	1.94799	1.95881	1.54287	1.83937	1.88848	1.03653	1.49388	1.10122	1.83769	1.75412	1.46825	1.71906	1.74556	-0.18149	0.650813	0.790414	1.13984	0.532288	0.917136	0.751351	0.367213	0.874015	0.224147	0.565696	0.056912	0.634666	0.670242	0.670463	0.0194391
ENSMUSG00000021534	1700001L19Rik	H	0.73257	0.844108	1.20982	0.625673	1.0133	0.86123	0.865595	0.573557	0.858421	0.900691	0.779751	1.06873	0.956624	1.13603	0.813909	1.30088	1.1558	1.35571	0.672724	1.0384	0.63696	0.888507	0.378631	0.617016	1.1411	1.05355	0.982307	0.704741	1.00265	0.913632	0.709234	0.153507	0.455926	0.385075	0.354879	0.33226	0.326889	0.64064	0.409444	0.62873	0.409295	0.396254	0.413888	0.419221	0.484816	0.327557	1.19243
ENSMUSG00000051323	Pcdh19	H	0.916506	0.997455	1.0238	1.30388	1.14388	1.30851	1.08458	1.2375	1.24604	1.14677	1.23742	1.35015	1.26164	1.43951	1.28582	1.29429	1.1097	0.694067	1.37157	0.980411	0.876017	1.17556	0.978046	1.01316	0.661153	1.09687	1.17805	0.901302	0.995724	1.14169	0.995414	0.928302	1.33632	1.48198	1.41036	1.19773	1.33246	1.1827	1.21387	1.35534	1.26034	1.11681	0.970305	1.39391	1.04502	0.97431	-0.34911
ENSMUSG00000042581	Thsd7b	H	1.76911	1.64282	1.72419	0.881564	1.76157	1.66471	1.6218	1.35036	1.52547	1.64528	1.54602	1.81115	1.59193	1.66072	1.42579	1.49219	0.232715	0.78949	0.667806	0.183716	0.0765056	0.651269	0.197995	-0.0923416	0.255897	0.55914	-0.014137	0.595848	0.465544	0.597753	0.151987	0.743363	0.81192	1.38114	1.27777	1.16367	1.48701	0.779764	1.03639	1.01563	0.871993	1.29567	0.91563	1.4276	1.07071	1.21504	-0.458352
ENSMUSG00000047606	Ankrd34c	H	0.638724	1.282	1.49224	1.15756	1.6802	1.46109	1.28303	1.99965	1.74411	1.49548	1.33382	1.44414	1.26457	1.90127	1.85211	1.65207	-0.164296	1.82626	0.889815	1.02478	0.946422	-0.366625	1.50121	0.136186	0.782215	1.05597	0.48037	1.24445	1.17947	1.02932	0.773667	-1.15482	-0.747977	-1.06863	-1.5524	-0.305579	-1.30431	-2.62704	-1.79644	-1.02925	-0.725724	-0.353644	-0.361448	-1.61469	-1.10786	-1.31967	1.01333
27493	NA	H	1.01219	0.534414	0.674425	1.1072	0.108964	0.903274	0.584996	1.20755	1.17285	0.803148	0.742863	1.15335	1.3475	0.976516	1.0514	0.788079	1.58407	1.33821	1.2262	0.685291	1.54952	1.58108	1.19498	1.02033	1.43323	0.569761	1.0196	1.16693	1.3562	1.47331	1.56941	-0.255191	0.542345	0.826977	-0.125521	-0.200332	-0.0790629	0.777749	-0.481177	-0.018632	0.392324	-0.650659	0.155473	0.288378	-0.0113127	0.378583	1.26039
ENSMUSG00000005917	Otx1	H	0.293933	0.762324	0.38654	-0.514363	0.299794	0.386878	0.601194	0.722469	0.575722	0.440489	0.401175	0.0651392	0.497621	0.580931	0.311417	0.646118	0.807235	0.5911	0.619398	0.545269	1.12176	0.639181	0.622295	0.772805	0.48911	0.845243	0.218929	0.374013	0.941881	0.254778	1.22472	0.224076	0.62391	0.653153	0.80947	0.518409	0.683673	0.437741	0.523076	0.874669	0.820007	0.573607	0.773995	0.672295	0.193921	0.30129	1.36017
ENSMUSG00000054986	Sec14l3	H	1.46883	0.989181	0.636588	0.929763	1.55531	1.28047	1.98613	0.727074	0.694309	1.1105	0.635362	1.18835	1.40241	1.13168	0.815169	0.433499	1.19497	0.662887	1.33773	0.969382	1.14687	1.76496	1.55246	1.96212	0.994615	1.76423	1.75652	1.33714	0.689294	1.23977	1.72464	-0.448601	0.283418	1.36472	0.638692	1.01943	-0.126931	1.44797	0.41337	1.2104	1.36965	0.541868	-0.225039	0.757735	-0.192464	-0.42575	-0.0264913
ENSMUSG00000021091	Serpina3n	H	1.34339	1.16704	1.40072	1.23673	1.12032	1.18885	1.84491	1.43466	1.78185	2.02368	1.62075	1.63508	1.85419	1.52678	1.57363	1.77988	-0.652418	-0.841916	-0.377576	-0.719065	-0.427517	-0.748108	-0.7882	0.312286	-0.490097	-0.499787	-0.683429	-0.502285	-0.410869	-0.483708	-0.41567	1.56541	1.65407	1.56833	1.64734	1.81718	1.745	1.58993	1.85962	1.56525	1.46879	1.90314	1.79464	1.59183	1.78938	1.89456	-0.505673
ENSMUSG00000035681	Kcnc2	H	0.477658	0.396491	0.30272	0.387914	0.518123	0.248733	0.278584	0.435244	0.529427	0.422379	0.588918	0.831195	0.512339	0.453202	0.937721	0.583283	0.311607	0.55685	0.418009	0.492843	0.538213	0.331668	0.548312	0.420025	0.390398	0.237698	0.696703	0.364539	0.720575	0.512262	0.523018	0.749455	1.14665	1.30345	1.07703	1.15165	1.11505	1.18536	1.00482	1.10203	1.01384	0.976471	1.14974	1.12409	1.03923	0.967897	1.36859
ENSMUSG00000047259	Mc4r	H	0.781245	1.38493	1.41791	0.252377	0.423012	1.11097	0.887662	0.827518	0.815288	1.07111	1.43616	0.226993	1.08766	0.768074	1.00456	0.837207	0.319869	-0.492424	0.533806	0.882237	0.928744	1.18072	0.795951	0.546172	0.893858	1.39058	0.276307	0.550101	0.410635	0.172752	0.863533	1.27883	1.02274	1.51948	2.00812	1.66274	1.70193	1.05715	1.60105	1.3552	1.48632	1.8355	0.851471	1.50823	1.72955	1.59243	-0.177348
68355	NA	H	1.21287	1.26325	1.48061	1.61573	1.22151	1.48122	1.39995	1.38697	1.29687	1.17309	1.5228	1.47393	1.33888	1.33894	1.26223	1.37907	0.850472	0.655156	1.03757	0.688549	1.16789	0.767353	0.843558	1.05107	0.609542	1.07634	0.550794	0.940852	0.774077	0.770596	0.904742	0.414133	0.588116	0.809793	0.858808	0.430531	0.884711	0.709601	0.256264	0.64122	0.692947	0.770449	0.558692	0.418945	0.424013	0.223991	-0.13779
ENSMUSG00000018451	6330403K07Rik	H	1.86545	2.04645	2.00827	1.86449	2.07084	1.95643	2.04612	1.93888	1.83718	1.85069	1.85618	1.82464	1.85997	1.84481	1.73991	1.85716	0.464331	0.235843	0.872163	0.626713	0.564523	0.91358	0.462755	0.238774	0.668408	0.848375	0.715003	0.683451	0.54609	0.556444	0.799278	-0.323411	-0.266106	-0.323676	-0.135942	-0.247819	-0.101508	-0.187251	-0.29921	-0.102722	-0.141273	-0.224964	-0.287923	-0.134289	-0.191183	-0.173863	0.177301
ENSMUSG00000036437	Npy1r	H	0.0187524	0.165068	0.33972	0.662031	0.0389874	0.476338	0.0887564	0.394516	0.478501	0.445045	0.387484	0.389444	0.715946	0.572757	0.664209	0.603553	0.839859	0.575317	0.554064	0.397622	0.436922	0.199513	0.368394	0.758544	0.238985	0.0850735	0.768863	0.24756	0.925211	0.634348	0.489202	0.80918	1.32788	1.30342	0.939794	1.24499	0.939211	1.349	1.16762	1.16594	1.46398	1.36681	1.19023	1.14027	0.96559	1.04696	1.14944
ENSMUSG00000075296	Aldh3b2	H	1.66086	2.01306	2.21696	0.373796	1.93635	1.27247	1.93127	1.32865	1.24949	2.02249	1.80576	1.52499	1.82333	1.72711	1.52864	1.65263	0.926124	0.859783	1.60144	1.96538	1.75873	1.32042	1.18225	0.860412	1.71046	1.96847	1.64032	1.47344	1.74134	1.3813	2.12499	-0.287024	-1.20501	-0.197403	-1.49238	-0.447	-0.390202	-0.893954	-0.46328	-0.463626	-0.547097	-0.939343	-1.08625	-0.80238	-0.546161	-0.939355	-0.025129
ENSMUSG00000038530	Rgs4	H	0.148068	0.209169	0.42028	0.29369	0.0220098	0.00702302	0.162646	0.478865	0.425833	0.4061	0.446528	0.485697	0.472724	0.367379	0.682949	0.457954	0.388337	0.864572	0.498497	0.702607	0.660835	0.328787	0.767907	0.573307	0.343981	0.364749	0.951859	0.532919	0.728775	0.389273	0.471088	-0.0955597	0.21318	0.261006	0.168243	0.268473	0.16603	0.136644	0.0441416	0.00713714	0.249556	0.134423	0.156319	0.26417	0.0103384	-0.0502553	1.97857
ENSMUSG00000034402	Kcnh5	H	0.542363	0.616058	0.687867	0.110123	0.911244	1.12529	0.739708	1.01005	0.851832	0.783686	0.37557	0.899601	1.01598	0.824208	0.805978	0.885456	0.926486	1.60637	0.734809	0.818222	1.20444	0.202012	1.73566	0.82713	1.145	1.0588	1.67173	0.973875	1.42556	0.658261	0.754524	0.0235366	-0.0432699	-0.0416936	-0.368782	-0.0446645	-0.109349	-0.317459	0.271223	-0.0165002	-0.665522	-0.432796	-0.0214603	-0.122834	0.0101331	-0.175928	1.36777
ENSMUSG00000021303	Gng4	H	0.961584	0.82364	1.02161	1.06443	0.944377	0.930687	0.945165	0.977603	1.014	1.03871	1.15725	1.17481	1.14571	1.15537	1.12015	1.29348	0.779215	0.993325	0.928706	0.937152	1.35654	1.04068	1.33315	0.757737	1.08844	0.854819	1.14304	0.970006	0.813434	0.776232	0.737672	-1.06965	-0.996617	-0.838464	-0.996894	-0.72674	-0.867446	-0.297067	-0.872152	-0.769318	-0.814385	-1.02445	-1.10037	-0.606838	-1.08757	-0.811535	-0.00204915
ENSMUSG00000019935	Slc17a8	H	0.162652	1.23712	0.583354	1.73521	0.591325	0.380642	0.381663	1.23999	0.134785	0.816746	0.79418	0.641647	0.948261	0.715308	1.05135	0.920977	-0.0163733	-0.381322	-0.17817	-0.306857	1.05626	-0.953473	-0.38544	0.218993	1.12437	0.0649888	0.0807118	0.639316	0.265302	-0.413672	-0.753309	1.62313	1.37306	1.65138	1.28482	1.54505	1.28342	1.5346	1.69175	1.64226	1.21301	1.67999	1.72086	1.74217	1.27001	2.08507	0.993411
ENSMUSG00000046204	Pnma2	H	1.03719	1.09435	1.21185	1.33129	1.14533	0.990264	1.02458	1.17216	1.06057	1.05799	1.15753	1.19004	1.2859	1.20919	1.20638	1.22017	0.877662	1.06564	1.07667	0.896893	0.865125	0.84325	1.01388	0.892905	0.803875	0.946801	1.21007	0.833737	0.84788	0.941749	0.789721	0.445593	0.574719	0.558314	0.732465	0.651525	0.582779	0.493051	0.550822	0.679632	0.666342	0.639319	0.39618	0.705064	0.474181	0.630021	0.428807
ENSMUSG00000061702	Tmem91	H	2.11202	1.96279	1.89879	1.42865	2.0039	1.63128	1.90115	1.65147	1.5566	1.68047	1.64211	1.56998	1.61982	1.69973	1.48601	1.80613	0.954912	0.931813	0.929154	1.25569	1.46693	1.28247	1.29896	0.974356	1.6749	1.45676	0.77457	0.920256	1.24746	1.42906	1.38955	-1.42645	-1.01736	-0.79568	-0.598311	-0.915823	-0.337658	-0.789443	-1.05522	-0.639632	-0.436626	-0.555761	-1.44132	-0.848678	-0.783046	-0.396459	0.1228
ENSMUSG00000040612	Ildr2	H	0.578706	0.410064	0.414635	0.502768	0.326656	0.503409	0.44673	0.219964	0.412542	0.517689	0.487712	0.587971	0.483995	0.480268	0.74669	0.427167	1.35347	1.42573	1.26734	1.3342	1.28114	1.11057	1.3801	1.26724	0.992615	1.03057	1.26819	1.02307	1.10927	1.04518	1.21717	0.216987	0.504897	0.764799	0.488161	0.546198	0.50237	0.625001	0.422614	0.58961	0.445676	0.360981	0.571607	0.697107	0.337593	0.609137	0.824356
ENSMUSG00000039257	Vstm2b	H	0.328533	0.353582	0.0986402	0.139092	0.490642	0.199585	-0.172566	-0.182546	-0.0400236	-0.0701453	-0.082814	-0.0920849	0.00328745	0.00652319	0.167591	0.32198	1.26418	1.30283	1.41938	1.46237	1.16169	0.922245	1.19644	0.811676	1.57753	1.14519	1.44067	1.37709	1.31712	1.58794	1.26297	0.779177	0.948883	0.850931	1.11233	0.692815	0.92672	0.796663	0.690232	0.900928	1.1905	0.939956	0.495514	0.738663	0.885434	0.98044	0.587392
ENSMUSG00000043165	Lor	H	1.74738	1.83407	1.40302	1.01616	2.06441	1.38319	1.54416	1.40907	1.47056	1.61219	1.4384	1.36909	1.38195	1.53048	1.38074	1.01834	0.204988	-0.0347942	0.545883	0.552931	0.183567	0.603167	0.249364	0.083274	1.29739	1.20819	0.841451	0.553138	0.712284	0.643362	0.77459	0.911096	0.554249	0.405797	0.896675	0.42703	0.734018	0.911608	0.606616	0.799886	1.08177	0.728593	0.74303	0.559072	0.70911	0.868518	-0.43418
ENSMUSG00000044816	D630023F18Rik	H	1.42793	0.970323	0.666477	0.814215	0.596914	0.703079	0.447581	0.452643	0.669388	0.843105	0.68661	1.11596	1.00544	1.18512	1.37052	0.495382	1.24897	0.338669	0.925562	1.44623	1.18317	1.63047	1.08951	1.0536	0.578427	1.21897	1.55222	0.870475	0.514947	1.32637	1.29696	0.374183	0.862655	1.18331	1.09829	0.795472	1.0151	1.12904	0.189624	1.01444	1.18753	1.03372	0.37725	1.15616	0.678966	0.650575	-0.123095
100040529	NA	H	0.875596	-0.128965	-0.0281592	-1.11611	-0.218546	0.103101	-0.108463	0.0109628	0.317382	0.40812	0.43637	0.873173	0.27575	0.366376	0.588991	0.679573	0.174935	0.554203	0.111003	0.0256549	0.593847	0.408458	0.805009	1.26657	0.163182	-0.802979	0.625705	0.674039	0.282664	0.544729	0.391772	0.806591	1.303	1.76305	1.13973	0.971081	1.09858	1.6706	0.981225	1.36079	0.841792	0.719671	0.476211	1.95091	1.38331	1.01079	1.45086
ENSMUSG00000024798	Htr7	H	1.61811	1.76935	1.54752	1.56179	1.72709	1.66433	1.63205	1.65356	1.59859	1.7733	1.87627	1.85106	1.76373	1.63706	1.99136	1.83814	0.353819	0.528991	0.698876	0.908628	0.891566	0.810694	0.870349	0.121134	0.680987	1.20083	0.400746	0.659771	0.758046	0.557484	0.925544	-0.424147	0.0249298	0.428252	0.206482	0.105253	0.198383	-0.144695	-0.059214	0.36717	0.0040431	-0.016665	0.344637	-0.163495	-0.0130838	-0.0420927	0.223223
ENSMUSG00000029420	Rimbp2	H	0.358137	0.362734	0.313157	0.317308	0.34345	0.426999	0.353016	0.246217	0.267725	0.422347	0.173088	0.305855	0.304729	0.0629699	0.132592	0.00589462	1.04296	1.13465	0.930465	0.878611	0.995538	0.685753	1.00654	0.822868	0.950255	0.667258	1.2779	0.998662	1.09216	0.923718	0.931197	0.812858	0.932272	1.09267	0.948526	1.02657	0.955527	0.866072	1.18243	1.00903	0.805983	0.99799	0.951644	0.72201	1.15229	1.17623	0.957292
ENSMUSG00000020656	Grhl1	H	0.125849	0.259199	0.479357	0.308578	0.150194	0.508165	0.177207	-0.00320254	-0.0965529	0.132918	0.299846	0.263005	0.180789	0.36033	0.132939	0.207586	1.12675	0.865557	1.61618	1.12168	0.695033	1.53365	0.745133	1.06589	0.868159	1.11615	1.51997	0.89378	0.93286	1.17823	1.38133	1.29864	1.42147	1.41004	1.41977	1.31712	1.35246	1.28415	1.15379	1.11971	1.45035	1.55358	0.975135	1.3349	1.40006	1.47545	0.0991184
ENSMUSG00000055471	Alk	H	1.85337	1.71879	1.54031	1.54072	1.71542	1.70371	1.5469	1.48922	1.65333	1.67379	1.67865	1.71669	1.69146	1.57981	1.58091	1.0864	0.889759	0.819847	0.729807	0.677019	0.599099	1.09642	0.977664	-0.303745	1.22145	0.75224	1.27435	0.686785	1.0184	0.422388	1.03159	-0.408197	-0.340041	-0.287056	-0.505618	0.160634	0.171258	0.108006	-0.0599685	-0.223545	0.052134	-0.0769662	-0.156215	0.140848	-0.0469326	-0.216096	0.189098
ENSMUSG00000033966	Cdkl4	H	-0.0750792	-0.155076	0.330616	-0.407384	0.0219598	-0.234435	0.252073	0.203768	0.156367	-0.0341943	-0.119568	0.241562	0.313234	0.090274	-0.034406	0.290399	1.26874	1.24291	1.55638	1.47426	1.68112	1.4849	1.54677	1.17309	1.34704	1.05779	2.01662	1.18771	1.41531	1.44717	1.51329	0.649056	0.761899	0.734749	0.64645	1.02821	0.88878	1.04591	0.654052	0.949971	1.11804	0.718951	0.686783	0.787205	0.350592	0.636157	0.67492
ENSMUSG00000037428	Vgf	H	1.29296	1.16463	0.922389	0.916505	1.38013	0.952643	1.04486	0.686285	0.999601	0.969894	1.04392	0.868447	0.855903	0.914829	0.810468	0.960554	0.594609	0.757636	0.723604	0.986342	0.732405	0.510346	0.731729	0.49886	1.5687	1.0056	1.26163	0.89564	0.955574	0.945069	0.893622	-0.0942205	0.0490787	-0.0478709	0.0127091	-0.119896	0.190575	-0.0552276	-0.0780044	0.132986	0.181665	0.147139	-0.133165	-0.0903925	-0.00516537	-0.154257	0.762421
ENSMUSG00000075224	Lrrc55	H	0.98081	0.827041	1.07218	0.75053	0.638143	1.00226	1.15967	1.35059	1.11826	1.01631	1.22615	1.15519	1.28799	1.1778	1.14578	1.43716	-0.271281	0.228429	-0.385919	0.0130686	0.31756	-0.288066	0.0956774	-0.292208	0.383108	0.535616	0.224209	0.201748	-0.0731972	-0.136286	-0.380256	-0.151687	0.0195812	0.0333789	-0.68832	0.0854736	-0.563232	-0.222034	0.0134911	-0.146265	-0.127854	-0.0280825	0.297736	-0.320349	-0.375493	-0.0416186	1.05296
ENSMUSG00000033007	Asic4	H	0.888937	0.675913	0.368722	-0.405874	1.14448	0.567121	0.548765	0.223061	0.307092	0.0978029	0.46335	0.519497	0.438162	0.308655	0.327397	0.250354	1.99432	1.31402	1.49173	1.18249	1.4098	1.33142	1.17213	1.36785	1.98585	1.84064	1.37898	1.22588	1.57986	1.38262	1.20995	0.00866737	-0.187654	0.374528	0.2584	0.0342253	-0.118086	-0.145361	0.193345	0.301269	-0.0118937	0.221531	-0.718417	0.238176	-0.0636706	0.175496	0.342277
ENSMUSG00000037995	Igsf9	H	1.5613	1.9816	1.33316	1.73804	1.62013	1.69787	1.57846	2.04161	1.64705	1.70126	1.48805	1.35618	1.55126	1.34073	1.54357	1.30247	1.40065	0.860135	1.1511	1.12388	0.815217	0.300547	0.7589	0.931157	0.703414	0.744061	1.0175	1.04147	0.434382	1.27738	0.948827	-0.191138	-0.397276	-0.0463265	-0.372942	-0.15161	-0.425445	-0.693853	-0.240023	-0.437666	-0.468867	0.0978827	-0.2822	-0.462186	-0.369621	0.205684	-0.139158
ENSMUSG00000064043	Trerf1	H	0.782672	0.556757	0.565219	1.10109	0.591313	0.727705	0.454329	0.551009	0.402602	0.444558	0.311856	0.392562	0.49044	0.312656	0.437787	0.131838	1.15804	1.28468	0.954406	0.800213	0.680262	0.939806	0.86003	0.851553	1.28199	1.02281	1.21772	0.832894	1.20811	1.26844	0.905731	0.647895	0.81046	0.629449	0.669349	0.65962	0.845447	0.434769	0.638244	0.54278	0.699361	0.592109	0.529823	0.457384	0.707127	0.9327	0.775801
ENSMUSG00000025089	Gfra1	H	1.10899	1.02133	1.217	0.998621	1.32407	1.03937	0.827496	0.964132	1.10542	0.776936	0.984305	1.07757	1.03535	0.989999	0.915043	0.858005	0.352405	0.803402	0.749343	0.516569	0.620054	0.459395	0.632553	0.390972	0.620751	0.947725	0.411752	0.731089	0.594608	0.346959	0.718394	0.960341	1.13442	1.18772	1.19923	1.08796	1.15501	0.825911	1.11511	1.1457	0.845486	0.938779	0.792114	1.17707	1.00348	0.993317	0.370163
ENSMUSG00000024565	Sall3	H	1.4238	1.0106	1.37457	1.06413	1.11361	1.20925	1.27708	1.40593	1.15992	1.23396	1.14273	1.09614	1.32071	1.11791	1.18734	1.25444	1.05286	0.251515	0.0845703	0.29134	0.506079	0.221867	0.664114	0.0609727	0.490008	1.12021	0.340894	0.493168	0.388333	0.691871	0.372921	-0.241467	-0.116281	-0.212949	0.138177	-0.281791	-0.0770247	-0.406798	-0.366064	0.0993183	-0.0745455	-0.203255	-0.174386	0.133154	0.0335685	-0.0926218	0.0687958
ENSMUSG00000035431	Sstr1	H	0.696906	1.21667	0.961849	0.75373	1.1649	1.357	0.936346	0.991059	0.867461	1.03605	0.951025	0.981085	1.07457	1.08187	0.978651	1.0692	1.0475	0.81235	1.30665	1.34387	0.916222	1.09649	0.699456	0.621769	0.914909	0.653214	1.34653	1.025	0.82742	1.12107	1.11624	-0.0164342	0.346877	0.664187	0.69608	0.155365	0.76413	0.679061	0.295362	0.600956	0.222281	0.321545	-0.182396	0.560962	0.399101	0.286477	0.469464
ENSMUSG00000046167	Gldn	H	1.31007	1.46719	1.94661	2.28337	0.71425	1.28006	1.54127	1.418	1.94145	1.62854	1.41183	1.9651	1.6954	2.21725	1.57986	1.6823	0.897124	0.727617	1.5667	0.811039	0.650589	1.42555	1.15643	1.3303	0.734751	2.08104	1.14056	1.0374	0.0354221	1.12521	1.75604	0.296427	-0.0935434	0.721254	0.47496	0.623266	-0.0349068	0.973001	-0.0189366	-0.45603	-0.223218	-0.286581	0.0102906	0.449438	0.336985	2.94948e-05	-1.13926
ENSMUSG00000041272	Tox	H	1.29034	1.03371	1.26304	1.55487	1.0565	1.32989	1.16044	0.747744	1.12898	1.15941	1.07304	1.40628	1.23587	1.34754	1.29973	1.64983	0.67395	0.45683	0.551	0.425396	0.652518	0.653956	0.274999	0.329606	0.162876	0.533253	0.543785	0.300098	0.589438	0.422501	0.526678	0.0840803	0.289628	0.412482	0.0996421	0.261124	0.142628	-0.134146	0.00645141	-0.0981008	0.443971	0.0335274	-0.141666	0.0432224	-0.0550504	-0.638656	1.0258
ENSMUSG00000073433	Arhgdig	H	1.22566	0.907767	0.912954	0.52034	1.24805	0.747446	0.954472	0.992992	0.864599	0.983969	0.96867	0.991634	0.752941	0.834272	0.834714	1.00538	0.522449	0.406189	0.108194	0.775978	0.377603	0.530693	0.465212	0.183723	0.656306	0.818808	0.510245	0.807496	0.726643	0.637104	0.495516	0.27497	-0.015364	0.0967416	0.156413	0.154839	0.369453	0.137422	0.215442	0.216788	0.472633	0.252203	0.0337663	0.0242166	0.143427	0.170363	0.869191
ENSMUSG00000024186	Rgs11	H	1.33443	0.889946	0.472759	0.629236	0.385705	0.673346	0.599086	0.7068	0.631645	0.631677	0.417641	0.367335	0.574963	0.214837	0.638497	0.265637	0.138748	0.121927	-0.151458	-0.0200608	0.0341894	0.124471	-0.856166	0.322047	0.781986	-0.0337387	-0.452327	0.236381	-0.372544	0.681399	0.540159	0.574229	0.974383	0.676756	0.799836	0.808688	0.579165	0.62987	0.582058	0.730918	0.961761	0.952182	1.03817	0.610267	1.02541	1.01776	1.24441
ENSMUSG00000009376	Met	H	-0.543733	-0.192954	0.395348	0.813989	-0.467657	0.0861199	0.457703	0.373315	0.283291	0.026627	0.260343	0.194919	0.0404743	0.0516667	0.642844	0.621799	1.0764	0.727194	1.38094	1.19073	0.316649	0.718759	0.883661	0.619357	0.0244955	1.21986	-1.03557	0.72338	1.81245	0.901004	1.61749	0.333022	0.751531	0.446172	0.682086	0.618571	0.696569	0.714055	-0.244639	0.232808	0.976195	0.346955	-0.233222	0.92172	-0.162179	0.333865	1.12123
ENSMUSG00000049946	BC030500	H	1.08947	0.886968	1.07173	1.22017	0.835078	1.08271	0.792766	0.940157	0.791719	0.957442	0.902543	0.9657	0.73684	0.866412	0.616619	0.983575	0.342518	0.163496	0.24104	0.314818	0.0671102	0.83594	0.0794742	-0.385581	0.413846	0.390024	0.0799987	0.0138346	0.14726	0.412644	0.306532	0.963375	0.871404	0.701424	1.09548	0.865794	1.11255	0.877012	0.835416	1.19234	0.990996	0.830201	0.709478	0.996288	1.03503	1.04105	0.320804
ENSMUSG00000054453	Sytl5	H	1.03334	0.986882	1.17425	1.21414	1.63039	1.29566	1.39205	1.72341	1.27511	1.36938	1.28059	1.42805	1.40679	1.0558	0.617068	1.4499	1.491	0.905324	1.87813	0.539393	1.77749	1.7773	1.45908	1.92096	1.14213	1.88324	1.11947	1.38934	0.487523	1.20672	1.54634	0.383302	0.305938	0.613141	0.373207	0.459849	0.559252	0.204507	0.441092	0.555343	-0.394162	-0.559903	0.925568	0.542724	0.10579	0.432752	-0.402731
330164	NA	H	0.0464852	1.0301	0.612665	0.849266	0.560836	0.824792	0.590664	0.499191	0.629083	0.555888	0.480724	1.16914	1.07101	0.349901	0.899682	0.663098	1.73097	1.14243	1.23189	1.10454	1.6354	1.4881	1.44701	1.39111	1.17564	1.33928	1.32935	1.1731	1.1413	1.18185	1.09642	0.0954115	0.137241	0.424455	0.304534	0.453309	0.401669	0.21195	0.288211	0.364021	0.303624	0.223201	0.246384	0.697508	0.479861	0.117067	0.585959
ENSMUSG00000003476	Crhr2	H	2.01236	1.53732	2.05907	1.68723	1.85224	1.08051	1.67423	1.62502	1.22063	1.42505	1.46056	1.45786	1.71099	1.55563	1.54691	1.8039	1.15643	0.754682	0.517303	0.906054	0.409599	1.31553	0.322181	0.909312	0.996067	0.543683	0.642736	1.02618	0.513703	0.944473	0.435234	-0.806221	-0.0845034	0.0100616	-0.492726	0.722587	1.7489	-0.485229	-0.765742	0.139218	-0.180967	0.075725	1.36717	-0.83036	-0.191793	0.0174935	-0.660216
ENSMUSG00000000402	Egfl6	H	1.26348	0.816237	1.42216	0.801443	0.799685	0.337537	1.3294	2.08441	1.34306	1.27312	1.23688	1.27009	1.29354	1.20182	1.4426	1.45535	1.21303	0.774805	0.935593	1.09437	1.36802	0.95104	1.2333	-0.57973	0.168666	1.60062	0.720726	1.39363	1.31115	0.717885	1.23594	0.766874	0.506453	1.11197	0.56648	0.781947	0.878649	0.466923	0.600148	0.736219	0.559146	0.765463	0.791926	0.452258	0.547304	0.300051	-0.0958543
320210	NA	H	1.03551	-0.431187	-0.385842	0.432884	0.306544	0.368073	-0.0564926	-0.377233	0.423531	-0.143636	0.0167703	-0.813816	0.0700922	-0.0640079	0.138253	0.0148937	1.49953	0.965003	0.898052	0.83498	1.0755	0.853946	0.909472	1.13411	1.42854	0.499312	1.09759	0.968638	0.880066	1.37392	0.580111	0.817261	1.38339	1.25223	0.873718	1.15964	0.684929	1.00948	1.00903	1.2384	1.4001	1.00211	0.637891	1.35546	0.96372	1.29368	0.588854
ENSMUSG00000027966	Col11a1	H	2.09912	1.84099	0.755862	1.79017	0.870848	1.53488	1.18018	1.74164	1.82257	1.55109	1.3966	1.53283	1.82891	1.33696	1.45246	1.2569	-0.367746	-0.237901	-0.176443	-0.769342	0.488869	0.605429	0.204071	0.471351	1.09209	-0.36924	-0.473148	0.358906	0.00176597	0.771733	0.227698	0.330665	0.54662	0.0767417	-0.0209247	0.264242	0.444218	0.938948	0.131086	-0.0358676	0.365119	0.243297	1.12648	0.471161	0.711239	0.869745	0.76211
ENSMUSG00000058498	Rnf207	H	0.222679	-0.202739	-0.494053	0.654283	-0.332054	-0.0599498	-0.354915	-0.779859	-0.0464395	0.16203	-0.521187	-0.379753	-0.250538	-0.384392	-0.0321567	-0.0489536	0.628251	1.13288	0.832864	0.455939	1.46467	1.82496	0.0443227	1.38092	1.75763	1.03993	1.34221	1.39062	1.64819	1.61476	1.83202	0.501382	0.445552	0.388664	0.521312	-0.17257	0.0451635	0.0694362	-0.131963	0.46193	0.660026	0.174704	0.11379	0.421631	0.36893	0.205689	0.876258
ENSMUSG00000055026	Gabrg3	H	1.41793	1.67256	1.04326	0.921082	1.53618	1.9788	1.78156	2.24386	1.44458	1.67617	1.64434	1.72205	1.66343	1.80443	1.82317	1.508	1.05804	0.525394	0.228162	0.0409298	0.809435	0.566672	0.601252	0.00912458	0.507719	-0.158772	1.06895	0.480639	0.428448	-0.249914	0.47127	-0.0207493	0.56941	0.214754	0.449596	0.612433	0.517513	0.589268	0.439821	0.32358	-0.325913	0.34146	0.388881	0.476797	0.38002	-0.756936	0.0661582
ENSMUSG00000035561	Aldh1b1	H	0.589702	0.880316	0.867356	0.933104	0.397596	1.00601	0.51472	0.254346	0.47762	0.717887	0.675668	0.842846	0.522388	0.657205	0.0359223	0.576715	0.454485	0.650133	0.10889	0.737269	0.67752	0.594323	0.838842	0.516938	0.635583	0.802187	0.657882	0.348502	0.984332	0.333874	0.514127	1.03034	1.08931	1.00083	0.846263	1.03046	1.12612	0.787592	0.995688	1.07723	0.846761	1.19934	0.825293	0.826939	1.1499	1.20409	0.344447
ENSMUSG00000070498	Tmem132b	H	0.0547081	0.0273668	0.0179183	-0.0625579	0.120875	0.0429445	0.0677886	0.0880278	0.0725987	0.0948445	0.127439	0.220506	0.241385	0.168801	0.0843647	0.179481	0.847253	0.894573	0.926201	0.855418	0.965566	0.549199	0.928927	0.966929	0.786635	0.783141	1.08902	0.767241	0.943067	0.821816	0.83411	0.820247	1.01364	1.03804	0.992573	1.07346	0.960152	0.980962	1.12762	1.11257	1.01547	1.05463	0.983323	1.10904	1.01541	1.00443	1.05311
620246	NA	H	1.808	1.19576	0.932211	1.08727	0.345267	1.24031	1.22787	1.23445	1.66465	1.62012	1.17239	1.14297	1.6553	0.991582	1.56025	1.09992	1.0009	1.24606	1.68418	1.42228	1.0516	1.5083	0.777909	0.229268	1.5374	1.7655	2.14623	1.05873	1.60498	1.64599	1.56449	-0.619054	-0.765552	0.00739684	-0.215012	-0.154258	-0.558888	-0.646969	-1.13733	-0.259604	-0.469132	-0.406471	-0.753907	0.00484489	-0.877638	-0.224609	0.431912
ENSMUSG00000024064	Galnt14	H	0.0174951	0.200269	0.387338	0.295427	0.256477	0.436649	0.481815	0.777954	0.186706	0.149096	0.240861	0.0747491	0.214021	-0.0441423	-0.145911	0.0332974	0.19711	0.806981	0.852843	0.382722	0.452486	0.409828	0.522083	0.45248	0.741736	0.220265	0.658176	0.904038	0.610745	0.268632	0.233654	0.806083	0.734395	1.05571	0.921724	0.868586	0.966467	0.72512	0.841387	1.0041	0.392676	0.786677	0.681626	0.72032	0.980096	0.966434	1.16907
ENSMUSG00000048483	Zdhhc22	H	1.89898	1.59105	1.58728	1.93725	1.72471	0.935959	1.19691	1.6967	1.16558	1.49914	1.20515	1.2446	1.29177	1.05853	1.1165	1.44843	0.961684	1.17572	1.10287	1.37056	1.06899	0.234315	1.37261	0.611014	1.49322	1.30512	1.48526	1.51562	1.16617	1.03476	1.54011	-0.939294	-1.23555	-1.41848	-0.696039	-1.14958	-0.933224	-0.488214	-1.15694	-0.970324	-1.19795	-1.09383	-0.777527	-0.992999	-1.53021	-0.625666	0.385221
ENSMUSG00000038775	Vill	H	0.487309	0.597998	-0.119349	0.396286	0.779513	0.0077807	-0.173037	0.00243586	0.180424	0.27872	-0.22181	0.026259	0.174797	-0.206189	0.239054	-0.0378024	1.27926	1.22342	1.5731	1.54079	1.80348	2.22233	1.13649	0.880092	1.78264	1.49476	0.998074	1.72445	1.38487	2.20173	2.12825	-1.17042	-0.473025	-0.28108	-1.21558	-0.623489	-0.571887	-0.10372	-0.830359	-0.480211	-0.0878567	-0.891993	-0.605437	-0.144408	-0.984575	-1.03202	1.04914
ENSMUSG00000031343	Gabra3	H	0.642847	0.47397	0.679601	0.745524	0.480332	0.667191	0.621083	0.717962	0.732208	0.694606	0.85398	1.02276	0.855704	0.849651	1.04315	1.12493	1.1894	1.08175	1.25624	1.15307	1.14211	1.18811	1.28363	1.28601	0.929826	0.794169	1.33682	0.977335	1.16049	1.18739	0.995384	-0.477919	-0.179671	-0.155275	-0.0718383	-0.263779	-0.0662176	0.127973	-0.491207	-0.177761	0.0639854	-0.362104	-0.514212	0.0112643	-0.659733	-0.0777047	1.12825
ENSMUSG00000021098	4930447C04Rik	H	0.911852	0.976473	0.717532	1.54867	-0.26293	1.23193	1.0619	1.50954	1.49968	0.739122	1.35835	1.27708	1.76495	1.40771	1.21999	1.78929	-0.912062	-0.309154	-0.7375	-1.41039	-1.53792	-0.513508	-0.657687	0.129212	0.00938081	-0.772005	-0.477263	-0.885376	0.110165	-0.0598813	-0.440892	-0.366721	0.300944	0.71999	-0.211569	-0.0442	-0.588765	1.24601	-0.586991	-0.184454	-0.154069	0.819774	1.05588	0.209372	-0.0649423	0.684643	1.64325
ENSMUSG00000066721	Zfp575	H	0.925443	0.961983	0.81934	-0.304353	0.909265	1.00415	0.394372	0.742167	0.466371	0.532912	0.368041	0.705986	0.785832	0.329692	0.220507	0.387198	1.28776	0.903732	0.740026	0.941625	0.872602	0.7776	0.661079	-0.267453	1.31626	0.787657	1.10224	0.68993	1.02943	1.09013	1.15568	0.100894	0.365883	0.575709	0.451864	0.205987	0.535874	0.336206	0.300485	0.482107	0.763654	0.464212	0.113133	0.130887	0.473234	0.36566	0.822377
ENSMUSG00000014813	Stc1	H	0.9215	0.717554	0.938568	0.338074	0.419572	0.644456	0.430619	1.02592	0.649859	0.435388	0.676172	1.18149	0.871515	0.973273	0.998542	1.09001	1.35915	0.95966	1.245	1.20546	1.53081	0.910423	1.66656	1.00594	0.453935	1.5319	1.33336	1.33255	1.07127	0.67094	1.1679	0.107109	0.305507	0.529781	0.666781	0.104061	0.111307	0.618598	0.291596	0.551498	-0.105545	-0.00449915	0.286541	0.0856767	0.560173	0.271832	0.284733
ENSMUSG00000028778	Hcrtr1	H	1.72951	1.73381	1.67645	1.06884	1.61845	2.07564	1.58313	1.90967	1.63162	1.32035	1.40551	1.76762	2.01182	1.73789	1.65753	1.11548	0.0888037	-0.555775	-0.459277	0.201071	0.610015	0.692598	0.0701884	-1.65504	1.06282	0.451145	1.15212	0.729553	0.522922	0.44104	0.233843	-0.784428	-0.476828	-0.636202	-0.635758	-0.255017	-0.944246	-0.350233	-0.0583556	-0.544834	-0.982678	-0.796088	-0.750647	-0.498808	-0.46411	-0.302049	0.831161
ENSMUSG00000022375	Lrrc6	H	0.935968	1.11291	1.15193	0.26667	0.662391	1.01169	0.967149	1.2175	0.860633	0.96923	0.790591	1.09559	0.94876	0.853913	0.733943	1.00701	0.114957	0.425988	0.466119	0.44447	0.145485	0.694926	1.01275	1.53	0.289711	0.96267	0.610592	0.641304	1.08505	0.0620176	1.37292	-0.150857	0.0807106	0.347728	0.169504	0.284804	0.250416	0.439752	0.150008	0.193472	0.450223	0.0338272	-0.108467	0.107135	0.0806986	0.153635	1.01211
ENSMUSG00000068154	Insm1	H	1.74132	1.40815	0.885674	1.03946	1.19379	1.24913	1.00996	1.13533	1.25958	1.04233	1.24186	0.859439	1.21612	1.04647	1.02009	0.943798	0.112702	0.129532	0.518265	0.520057	0.181556	-0.293718	0.199556	0.469479	0.788552	0.588569	0.383152	0.397821	0.873747	0.453508	-0.150566	0.397866	0.793225	0.441118	0.545922	0.0144642	0.799169	0.676377	0.166167	1.00116	0.890274	0.534054	0.711934	0.582729	0.399961	0.695171	0.159117
ENSMUSG00000031558	Slit2	H	1.34394	1.62561	1.55145	1.96065	1.71688	1.7223	1.7773	1.67493	1.6104	1.66429	1.53629	1.72369	1.81612	1.7594	1.42714	1.3597	0.349389	0.490708	0.245146	-0.0142657	0.3522	0.104065	0.4719	-0.136621	0.409933	0.38194	0.807925	0.423315	0.461286	0.0457952	0.205741	0.107958	0.515098	0.948819	1.01699	0.637535	1.07805	0.894246	0.458379	0.802619	0.214824	0.523813	0.431315	0.698776	0.517554	0.404757	0.00606583
ENSMUSG00000039488	Cntn5	H	1.14715	1.32718	1.55291	0.789399	1.25323	1.55053	1.3442	1.92897	1.23433	1.27972	1.24255	1.48085	1.27072	1.4392	1.69609	1.37464	1.49823	1.72546	1.06734	0.962534	1.44241	1.08158	1.90959	1.09772	1.0305	1.13715	1.37057	1.35392	1.02998	1.06286	1.18338	-0.48083	-0.718347	0.0259341	-0.817707	-0.392441	-0.800437	0.0957089	-0.251585	-0.339306	-0.523731	-0.445863	0.0226636	-0.409539	-0.651969	-0.65489	-0.212926
ENSMUSG00000051435	Fhad1	H	1.56903	1.7025	1.64248	1.91829	1.71176	1.70144	1.71825	1.5136	1.43472	1.54034	1.42127	1.46379	1.76876	1.38842	1.36878	1.57321	-0.789974	-0.0604851	-0.0123767	0.264301	-0.18094	0.354447	-0.0208215	-0.659931	-0.431699	0.300646	0.483037	0.165961	-0.166438	0.298567	0.111972	0.163185	0.275198	0.176323	-0.208561	0.259851	0.55665	0.33181	0.417614	-0.038344	0.277914	0.456154	0.715529	0.0611196	0.287433	0.3655	0.325962
ENSMUSG00000024511	Rab27b	H	1.08883	1.09383	1.50246	1.32988	0.966405	1.20039	1.12653	1.16487	1.54506	1.20074	1.50798	1.69648	1.62565	1.58177	1.67521	1.74586	0.327781	0.209692	0.505405	0.265341	0.300569	0.436265	0.0348193	-0.0933521	0.140386	0.291672	0.541851	0.275728	0.262053	0.0784482	0.430462	0.494793	0.906729	0.947651	0.783165	0.814829	0.64968	0.948622	0.610848	0.811983	0.77864	0.711289	0.569991	0.697698	0.548182	0.608487	0.566765
ENSMUSG00000045912	C2cd4c	H	1.27398	1.33726	0.839356	1.04298	1.2439	1.05915	0.786178	1.26212	0.838829	0.903434	0.780476	0.659562	0.898665	0.7884	0.625891	0.75468	1.33315	1.15112	1.45788	1.16242	1.15306	1.15254	0.889633	0.871659	0.836911	0.70641	1.14045	0.916062	1.14272	1.07868	1.12284	-0.0568527	0.230306	0.482585	0.422961	0.19364	0.508294	-0.132451	0.252915	0.453929	-0.016165	0.257724	-0.395387	0.419901	0.282201	0.386026	0.128325
ENSMUSG00000047907	Tshz2	H	0.709478	0.6241	0.868517	0.612345	0.780268	0.866653	0.744116	0.611454	0.488421	0.772474	0.636222	0.754121	0.730592	0.64249	0.500428	0.715538	0.238825	0.480909	0.573655	0.474761	0.810728	0.526627	0.768794	0.366528	0.640639	0.770318	0.54467	0.546997	0.376939	0.34369	0.343242	1.07173	0.983888	1.14627	0.629293	1.18817	0.711863	0.915024	1.03564	0.961026	1.06793	0.647674	0.90563	0.952527	0.60462	0.479115	0.392535
ENSMUSG00000017466	Timp2	H	1.47731	1.41278	1.4425	1.37958	1.46783	1.34007	1.32485	1.39482	1.34329	1.35412	1.35646	1.45814	1.34908	1.38681	1.41205	1.44713	1.01009	0.656127	1.12114	0.984823	0.848107	1.12233	0.898131	0.848674	0.839394	1.02523	1.14695	0.937244	0.948611	0.962266	0.97788	-0.402454	-0.0438671	0.219016	0.264941	-0.0440637	0.473966	0.287502	-0.330016	0.183408	0.167064	-0.237098	-0.320527	0.407797	-0.286494	0.00401092	-0.0931873
ENSMUSG00000093910	Zfp853	H	0.507994	1.05447	0.870239	0.905283	1.14132	1.03027	0.556063	0.614418	0.719181	0.855382	0.673308	0.412399	0.872388	0.615304	0.385923	0.236867	1.04125	1.00013	1.58564	1.17994	1.32608	1.28238	0.997356	1.42367	0.874289	1.10494	0.338176	1.47833	0.810161	1.37592	0.665414	0.102902	0.344862	0.545208	0.298659	-0.106889	0.233029	0.22839	0.0327967	0.529779	0.059089	0.135475	-0.121483	0.0230719	0.197286	-0.265957	0.440408
ENSMUSG00000052026	Slc6a7	H	0.916158	0.791822	0.60771	0.436134	0.646109	0.446942	0.56132	0.596769	0.462663	0.655999	0.468186	0.535752	0.447774	0.355323	0.567328	0.396509	0.978226	0.890936	0.689539	0.806407	0.72692	0.924655	0.663666	0.884073	1.23897	0.632013	1.21641	0.893639	0.964482	1.18383	0.951206	0.130162	0.285843	0.454746	0.56926	0.311908	0.551261	0.420496	0.294405	0.470463	0.530306	0.316964	0.182238	0.530029	0.41121	0.726584	0.473748
ENSMUSG00000031224	Magee2	H	1.52129	1.66994	1.73922	1.3084	1.23118	1.79198	1.64497	1.81438	1.55962	1.4987	1.55241	1.8481	1.64687	1.6879	1.86344	1.68775	0.554494	0.550397	0.860719	0.663484	0.66408	0.606633	0.43713	0.779471	0.472808	0.503376	0.294712	0.860786	0.427167	0.541674	0.703219	0.419397	0.626043	0.429548	0.624263	0.778044	0.454355	0.311002	0.452923	0.635017	0.613376	0.758707	-0.0888308	0.544649	0.496523	0.239255	-0.437155
330324	NA	H	0.928315	-0.171365	0.319639	0.773805	-0.501716	0.558434	0.274976	0.804149	0.362243	0.36938	0.0202563	0.442597	0.257657	0.16167	0.0903968	0.623968	1.46881	1.16931	1.04972	1.4183	1.09191	0.555092	1.84455	-0.743841	1.44935	1.43416	0.806519	1.50347	1.43001	1.13304	0.954229	0.372853	-0.142173	0.00243875	-0.441939	0.485164	0.299131	-0.212519	0.420159	0.160315	0.0201458	0.162765	0.258111	0.150448	0.144902	-0.3878	1.12368
ENSMUSG00000024084	Qpct	H	1.67089	1.68152	1.95731	1.58795	1.63496	1.95264	1.6966	1.69366	1.74013	1.7624	1.77605	2.02615	1.92939	1.87166	1.85704	2.10771	0.177279	-0.573299	0.10653	0.248758	0.344887	0.393354	0.148169	-0.0665956	-0.156453	0.656402	0.311865	-0.111254	-0.023115	0.136966	0.41886	0.053771	0.00461957	0.158984	0.083127	0.124147	-0.0455032	0.137202	0.115398	0.0163	0.136446	0.0453247	-0.153976	0.143206	-0.135532	0.170806	0.167437
ENSMUSG00000037593	BC030499	H	1.14356	0.465335	0.140735	0.273596	0.394007	0.9663	0.455178	1.14119	0.612011	0.254278	0.00569807	0.540372	0.546027	0.0862839	0.348201	1.04659	0.808665	0.93413	0.806619	-0.455551	0.323405	0.902513	-0.415215	0.982204	0.403693	0.641059	0.578112	0.582688	1.04157	1.05314	1.16172	-0.130548	0.349606	0.192676	-0.423923	0.0828888	-0.385472	-0.983779	0.257714	-0.11243	0.0538673	-0.478399	-0.32295	-0.404721	0.0759025	0.0412233	1.27521
ENSMUSG00000032572	Col6a4	H	1.13681	0.170182	-0.146464	0.222062	0.107101	0.208988	-0.302392	-0.169779	0.435961	-0.388662	-0.124541	-0.512753	0.650837	0.66064	-0.95759	-0.476097	1.36728	-2.26512	1.40763	0.741513	1.12066	2.29926	-0.323543	1.21199	1.3766	1.06881	1.76667	2.40989	0.0698715	0.404974	2.0007	0.27033	0.404756	-1.40186	0.0157842	1.09434	0.555266	0.75978	0.773461	0.643179	0.573499	1.86568	0.955789	0.125821	2.07656	1.37886	0.258477
ENSMUSG00000032033	Barx2	H	-0.262433	0.498802	0.569259	-0.525333	0.732412	0.826551	0.512662	0.6781	0.321833	0.20302	0.395669	0.565059	1.08841	0.56699	0.345743	0.556942	0.0574936	0.496208	0.905819	1.05206	1.48033	1.10966	0.916211	0.0502785	0.670832	0.446973	0.66433	0.402345	1.3622	0.704596	1.43214	-1.305	-0.651994	-0.428099	-0.749709	-0.621537	-0.416607	-0.420906	-0.639017	-0.183891	-0.46819	-1.29732	-1.09413	-0.705369	-1.05864	-0.750535	1.89403
ENSMUSG00000048281	Dleu7	H	1.69262	1.32855	1.24723	1.98446	1.18827	1.21301	1.20833	1.36245	1.56121	1.25092	1.70943	1.66294	1.30914	1.59508	1.44601	1.41218	0.39394	0.205386	0.559003	0.45119	-0.245345	0.592156	0.306649	0.280053	0.525763	0.877023	0.739208	0.616675	0.484172	0.266414	0.248038	-0.336126	-0.0728429	0.0716808	0.127255	-0.00763105	0.210236	-0.190234	-0.333006	0.542644	0.496098	-0.320154	-0.330593	0.364702	-0.167715	-0.0354256	0.1508
ENSMUSG00000036469	2019-03-01	H	0.531876	0.551272	0.777995	0.749753	0.694839	0.692604	0.538683	0.636504	0.857176	0.661008	0.797642	0.968783	1.01777	0.880395	0.914685	0.967864	0.810425	0.616207	1.06818	0.710849	0.640391	0.787417	0.951345	0.972563	0.29891	0.412082	0.940535	0.773216	0.794674	0.761734	0.619643	0.788937	0.912879	1.11168	0.962234	0.936322	0.815851	1.1903	0.938021	0.918582	0.763236	0.812191	0.774305	1.01923	0.919575	0.836846	0.358168
ENSMUSG00000026344	Lypd1	H	0.527227	0.0198463	-0.123531	-0.0160028	0.168585	0.110011	0.260088	-0.114144	-0.00890726	-0.208124	-0.0186058	0.0321342	-0.0670511	0.0861187	-0.249977	-0.228782	2.42176	2.02759	2.50749	2.1068	2.14157	1.84284	2.06189	1.6725	1.75513	2.22661	2.43361	1.58319	2.02423	2.20345	1.59315	0.0863635	0.300659	0.55092	0.746457	0.562101	0.540919	0.23873	0.551074	0.564506	0.434583	0.553236	0.251649	0.383689	0.462625	0.615383	-0.651891
ENSMUSG00000051401	Kctd16	H	0.338776	-0.624446	0.142581	-0.457435	-0.671757	0.101008	0.15958	-0.249998	0.11636	-0.0860192	-0.155645	0.0102	0.252727	0.12526	0.459804	-0.278757	0.843362	1.54117	1.33744	1.19069	1.55828	1.15251	1.36694	1.1582	0.618911	0.342202	1.35025	0.718723	1.34917	1.14217	1.1168	0.340229	0.906891	0.746033	0.858942	1.01164	0.512031	1.01074	0.988196	1.03841	0.577182	0.529961	1.03607	1.06169	0.929564	0.949335	0.687211
ENSMUSG00000031285	Dcx	H	0.660389	0.178479	-0.00168976	0.140295	-0.0318665	0.363072	0.235321	0.118006	0.416547	0.172602	0.253829	0.619413	0.74567	0.372099	0.396789	0.367145	0.901467	0.826793	0.801268	0.434316	0.843058	1.04282	0.96914	0.888277	0.531545	0.758458	0.770902	0.719977	0.780755	0.681828	0.720991	-0.512156	0.263926	0.187139	-0.28502	-0.427652	-0.443394	0.0161014	-0.31308	0.0575694	-0.0912591	-0.404507	-0.361309	0.0311416	-0.500623	-0.385933	1.0081
ENSMUSG00000091243	Vgll3	H	0.811578	1.00127	1.6423	1.32824	-0.163398	2.0281	0.675365	0.916381	0.959638	1.25425	0.291049	0.720583	1.25294	1.02083	1.153	1.2293	1.7575	-0.612667	1.8983	1.36376	0.789594	1.80727	0.771976	-1.75071	-0.63642	1.27472	0.093111	1.71884	0.721385	1.87092	1.64135	-0.439922	0.231899	1.52408	1.58271	-1.12774	1.14578	1.69955	-0.446047	1.31019	-0.611243	-0.88861	-1.7364	1.77902	0.64252	0.803295	-0.332748
ENSMUSG00000074899	Sptbn5	H	1.577	1.09202	1.449	1.4755	1.14142	1.3911	0.788907	0.887915	1.11623	0.900235	1.1059	0.945342	0.823304	0.973579	1.0711	1.33697	1.47545	0.690038	0.143642	0.369724	-0.200081	0.550885	-0.729153	-1.82337	0.945956	-0.852397	0.13461	0.537544	-0.352427	1.39032	0.313722	-0.56016	-0.810568	-0.456745	-1.39912	-0.330671	-0.912696	-0.508668	-0.660922	0.00993952	-0.0837448	-0.451016	-1.17338	-0.46449	-0.350565	0.0134289	1.02336
ENSMUSG00000031112	Stk26	H	0.449112	1.47193	1.18451	1.49868	1.31819	1.18701	1.0696	0.98545	1.19176	1.15301	1.16285	1.58855	1.40241	1.35072	1.63038	1.70212	0.456748	0.136728	0.82977	0.236327	0.197327	0.511794	-0.256992	-0.162951	0.00256116	0.0538499	0.39305	-0.131241	-0.332676	0.188066	0.12123	0.456373	1.04258	1.16048	0.991993	0.581945	0.564349	0.941201	0.618099	0.867359	0.875468	0.945438	0.846143	1.229	0.691193	0.953661	0.600783
ENSMUSG00000066800	Rnasel	H	-0.162501	0.353769	0.60559	0.945054	-0.241615	0.323762	0.328526	0.228915	0.557398	0.334671	0.354051	0.580195	0.369774	0.251941	0.252666	0.315667	1.02752	0.9515	0.580474	0.628413	0.282362	0.385926	0.819707	0.457908	0.238056	0.142842	0.690633	0.3381	0.668984	0.725295	0.713913	-0.200338	0.482175	0.810718	0.533211	0.281344	0.044931	0.282961	0.585122	0.430494	-0.0372958	0.192119	0.485612	0.268181	0.446008	-0.10421	1.31763
ENSMUSG00000047228	A2ml1	H	-0.222598	0.293307	0.27867	-0.525557	0.539986	0.216222	0.0952977	0.453913	0.270121	0.0764617	0.487561	0.197603	0.51965	0.243369	0.273576	0.491638	0.886283	0.409928	0.731047	0.911569	0.856265	0.400001	0.88227	0.19382	0.109082	0.198221	0.979325	0.315194	0.776689	0.437767	0.820756	0.448767	0.343344	0.983642	0.138911	0.539875	0.446668	0.423901	0.3043	0.698026	0.217327	0.535829	0.0549077	0.549855	0.395297	0.633648	1.1857
ENSMUSG00000040412	5330417C22Rik	H	0.865762	1.21364	1.08361	1.15343	0.994832	1.32319	1.09485	1.02655	1.05231	1.25057	0.795191	0.855148	1.20897	1.03321	1.13346	0.907657	0.636481	0.620486	0.469339	0.603836	0.247988	0.377454	0.750496	0.263895	0.986926	0.368822	0.518137	0.744173	0.466198	0.656176	0.6572	0.264821	0.396541	0.643818	0.393137	0.597406	0.419492	0.492516	0.544945	0.551008	0.405066	0.249434	0.312943	0.259468	0.411674	0.438949	0.437235
ENSMUSG00000078202	Nrarp	H	1.2257	1.21654	0.980912	0.760436	1.11601	0.891468	1.20499	0.690401	1.13371	0.818407	1.14338	1.05243	1.00268	1.06778	0.966865	1.17813	0.902053	0.453886	1.32658	0.91631	1.13364	0.739147	0.923841	0.78277	1.43101	1.25652	0.804608	0.848278	1.12484	1.13852	1.26018	-0.0273454	0.578294	0.0303826	0.334048	-0.351784	-0.0146236	0.158152	-0.288534	0.507754	0.333499	0.155834	0.117194	0.274448	-0.000864831	0.287882	0.287889
ENSMUSG00000021278	Amn	H	0.750115	1.05598	0.6119	0.607443	1.06423	0.239798	0.485525	0.719117	0.738596	0.967322	0.690522	0.842265	0.256064	0.482657	0.849639	1.10091	-0.0188835	0.617158	-0.128552	0.605462	0.504341	-0.233703	0.131605	-0.484029	0.617328	0.467105	0.785296	0.28918	0.53193	0.740908	0.648495	0.657711	-0.00690681	0.436315	-0.233887	0.162062	-0.145328	0.095962	-0.058088	0.681675	0.403425	-0.0383796	-0.0934306	0.575773	-0.351226	-0.345698	0.735608
ENSMUSG00000054013	Tmem179	H	1.17299	1.16817	1.12075	0.768166	1.28591	1.0294	1.12402	0.783812	0.800997	1.044	0.963761	0.850753	0.828319	0.831391	0.794837	0.862951	0.589293	0.493524	0.66927	0.719088	0.427629	0.665174	0.408976	0.433456	0.815199	0.824029	0.72925	0.72833	0.678753	0.756517	0.691535	0.203041	0.188687	0.130818	0.384497	0.320315	0.458753	0.110817	0.391611	0.281346	0.405028	0.416829	0.0496582	0.346464	0.481443	0.457998	0.306999
ENSMUSG00000026697	Myoc	H	-0.0770758	-0.403832	-0.334686	0.375358	0.125734	-0.0990005	0.794505	0.866758	-0.2388	0.109702	0.0380685	-1.00678	-0.661195	-0.328901	-0.946213	-0.484851	0.883689	1.53692	1.37553	1.74937	1.77421	1.57892	1.64546	2.59447	1.32697	2.60405	0.618092	1.90021	1.70048	1.16557	1.63687	0.217875	-0.156127	0.447761	-0.192312	0.273654	-0.0256589	0.665915	0.903717	0.346082	0.0185372	0.00256031	0.14828	0.767167	0.314763	-0.485068	0.543696
ENSMUSG00000036218	Pdzrn4	H	1.33783	1.15592	1.37744	1.3653	1.44058	1.24196	1.03068	1.34497	1.13033	1.22572	1.1323	1.23812	1.23053	1.17293	0.97879	1.26997	0.982102	1.02758	1.26373	1.24511	1.25636	1.54758	1.31088	1.84033	1.24148	1.49431	1.15704	1.09015	0.945488	1.40386	0.973701	-0.185437	-0.178697	-0.291294	-0.434192	-0.38518	-0.60713	-0.563155	-0.627426	-0.440361	-0.148557	-0.424877	-0.514846	-0.270158	-0.641762	0.0924433	-0.318341
ENSMUSG00000032500	Dclk3	H	0.160503	0.450972	-0.00439751	0.0621193	0.444206	0.0977123	0.0820322	0.0549933	0.0910392	0.0296231	0.0684714	0.29364	-0.0144337	0.253589	0.125927	0.0429554	1.39073	1.39638	1.26852	1.36268	1.0701	0.927638	1.23893	1.07921	1.43832	1.41869	1.47134	1.37996	1.27666	1.5199	1.32631	0.21809	0.044809	0.118421	0.241776	0.325081	-0.0477084	-0.0768272	0.306463	-0.0351435	0.062712	0.311299	-0.210989	-0.151378	0.30178	0.378029	0.755821
ENSMUSG00000060534	Dcc	H	1.0235	0.720026	0.735454	0.889563	0.758111	1.20735	0.90757	0.940109	1.15988	0.954538	0.986509	1.20416	1.20989	1.13911	1.11675	1.0761	0.720184	0.278212	0.666775	0.260376	0.450647	0.653426	0.827642	0.234401	0.502833	0.511911	0.60756	-0.151218	-0.0176438	0.167885	0.487827	0.594497	0.984159	1.60991	1.16241	1.26194	1.0511	1.46531	1.12963	0.972083	0.556993	0.885628	0.934505	1.03617	0.833465	0.726273	-0.00111648
ENSMUSG00000047143	Dmrta2	H	0.888983	1.41363	0.55218	-0.375352	0.939756	0.797679	0.0716107	0.692174	1.11926	1.27652	1.38485	0.556463	1.22622	0.597827	0.916232	0.499734	1.10366	-0.191351	0.363815	0.572777	0.18584	0.662858	0.0576984	-0.687497	0.0207414	0.638993	-1.41771	0.627933	0.409613	0.344105	0.548896	0.874572	0.446937	0.457286	0.567942	0.332371	0.8381	0.509775	0.313443	0.66342	0.607289	0.488486	0.445528	0.243585	0.427584	0.485405	0.226914
ENSMUSG00000020297	Nsg2	H	0.43838	0.598845	0.659957	0.459841	0.704528	0.457988	0.424102	0.452849	0.383343	0.576431	0.443238	0.470448	0.46972	0.460797	0.469734	0.518052	0.897538	0.88252	0.992762	0.935541	0.907533	0.731962	0.975773	0.833494	0.908572	0.939749	1.20204	0.935839	0.91664	0.871004	0.868934	0.570615	0.631489	0.652466	0.74447	0.736634	0.841783	0.571107	0.710107	0.749652	0.660075	0.781379	0.444062	0.731809	0.648519	0.785583	0.124417
ENSMUSG00000021223	Papln	H	1.08586	1.20803	0.702359	1.85221	1.35593	1.25786	1.75772	1.71359	1.13965	1.61948	0.891591	1.29167	0.979815	1.26957	0.924565	0.0211762	1.95132	1.46451	1.15004	0.335865	1.44078	1.43265	1.44337	0.545497	1.53413	0.120046	1.02934	1.46712	1.03377	0.628881	1.05602	-0.187748	-0.613787	-0.353754	-0.715215	-1.07363	-0.243724	-1.50727	-1.30152	-0.393938	-0.608017	-1.2265	-0.829557	-0.914072	-0.903288	-1.13659	0.200015
ENSMUSG00000029206	Nsun7	H	0.39116	0.753984	0.649467	0.738919	0.132303	0.463972	0.969272	0.49122	0.434008	0.887049	0.762803	0.307661	0.521722	0.389217	0.215538	0.11246	1.04729	1.36737	1.31217	0.569466	0.804425	1.22853	1.09828	1.60043	0.836564	0.458516	1.0215	0.84136	0.833442	1.00118	0.960467	0.391017	1.04038	1.18104	0.430112	0.600526	0.611822	0.88671	0.947735	0.928523	0.784018	0.719595	0.951949	1.10522	0.652135	1.09242	0.300777
ENSMUSG00000071984	Fndc1	H	0.660694	0.947963	0.587904	0.932746	0.849153	1.37435	0.688195	1.33896	0.894001	0.788798	0.709413	0.904918	1.01127	0.776905	1.07648	0.254097	1.51477	1.37222	1.2032	0.906931	1.19289	0.514105	0.390694	0.811271	1.17588	0.248354	1.53645	0.827672	0.79531	1.22637	0.633908	-0.106482	0.837613	1.01689	1.03374	0.63915	0.965383	0.731326	0.678172	0.479481	-0.0503598	0.502303	0.206977	0.454585	0.532734	0.466693	-0.813492
ENSMUSG00000029245	Epha5	H	0.20845	0.234122	0.119541	0.36434	0.157526	0.245556	0.267331	0.199097	0.418597	0.303485	0.435295	0.704041	0.3866	0.542622	0.516683	0.492003	0.741029	1.03685	0.920459	0.806386	0.717826	0.577054	1.15955	0.641122	0.874753	0.640684	1.32178	0.914953	0.819218	0.605098	0.664328	0.695046	0.979229	1.10955	0.868315	1.14964	0.827074	0.983879	1.0837	0.967217	0.901733	1.00913	0.991594	0.790287	0.879814	1.02416	0.211249
ENSMUSG00000025969	Nrp2	H	0.976021	0.876916	1.19168	0.973007	0.966705	1.0176	1.01342	1.01597	0.95036	1.04762	0.775626	0.932437	0.898224	1.0396	0.819277	1.00976	1.06056	1.33357	1.2917	1.33283	1.08554	0.885974	1.39783	1.29062	1.25578	1.05156	1.40792	1.29855	1.01004	1.0852	1.12784	0.487221	0.750582	0.918702	0.717582	0.726974	0.825744	0.906487	0.831292	0.752048	0.315358	0.624815	0.617199	0.984077	0.899281	0.639315	-0.962684
ENSMUSG00000062760	Shisal1	H	0.887306	0.735107	0.989697	0.872935	1.07096	0.873843	0.786458	1.07086	0.951485	1.06962	0.794509	0.949155	0.850686	0.918543	1.04393	0.818182	1.1894	0.822104	0.941026	1.10749	0.82976	0.81433	1.11358	0.988953	0.741483	1.07073	0.988173	1.11759	0.82545	1.0759	0.920367	0.499987	0.487429	0.526678	0.661609	0.41823	0.609042	0.317131	0.602609	0.570126	0.382933	0.491563	0.583461	0.574686	0.726938	0.577259	-0.473122
ENSMUSG00000027315	Spint1	H	0.813615	0.557543	1.15788	1.71275	1.48074	0.768044	1.20164	1.09912	0.797711	0.836341	0.964479	0.637762	0.891935	0.700374	0.675135	0.797482	1.34899	0.776023	1.17811	1.41945	0.735374	2.28387	1.66657	-0.3284	0.91034	1.27008	1.47337	1.59663	1.4086	1.2776	1.56013	-0.179525	-0.183026	-0.136004	0.243963	0.128628	0.611049	-0.342945	0.419782	0.156952	0.32325	0.592404	-0.125368	0.428742	0.16847	0.544371	-1.01581
ENSMUSG00000003363	Pld3	H	0.513583	0.546295	0.535574	0.364736	0.689482	0.423018	0.438254	0.313867	0.170794	0.475149	0.294063	0.206283	0.177447	0.192784	0.162293	0.278492	0.858764	0.82579	0.871897	1.11208	0.771907	0.553362	0.830839	0.69264	0.92276	0.736139	1.07079	0.95955	0.926394	0.973292	0.803037	0.300918	0.234539	0.175364	0.358657	0.314704	0.434516	0.131488	0.434767	0.339414	0.373326	0.407034	0.0890663	0.364622	0.346747	0.397698	0.709198
100504601	NA	H	-0.316194	0.529007	0.410144	0.56317	-0.115095	0.281823	-0.0249563	0.216468	0.492966	0.360401	0.52941	0.532004	1.02645	0.146826	0.280928	0.745288	1.87278	1.61792	2.18975	1.3619	1.73521	1.45892	1.45845	1.87208	1.15122	1.30675	1.78301	1.68788	1.63298	1.60275	1.53918	-0.640428	-0.598598	0.162637	0.387418	-0.039365	0.186327	0.510487	-0.0465241	0.259328	0.113596	-0.648246	-0.706136	0.257254	-0.23696	-0.0317748	0.0680599
ENSMUSG00000042604	Kcna4	H	0.608624	0.48575	0.272565	0.378876	0.444813	0.272182	0.318596	0.415657	0.562524	0.476178	0.515475	0.609073	0.56863	0.481273	0.668626	0.531364	0.491433	0.672553	0.603922	0.423851	0.523552	-0.0650488	0.453061	0.495147	0.387133	0.441159	0.742675	0.137626	0.644994	0.542948	0.276705	0.635162	1.23939	0.794291	0.530721	0.894747	0.591611	0.919971	0.904872	1.01101	1.063	1.19345	1.25181	1.15223	0.656419	1.01918	0.25238
ENSMUSG00000049420	Tmem200a	H	-0.140924	0.173087	0.417274	0.69905	-0.0107569	0.331402	0.161286	0.129958	0.0426799	0.182975	0.451376	0.240723	0.687086	0.543125	0.398157	0.501945	0.494546	0.614647	0.341315	0.492873	0.249348	0.779123	0.696963	0.266644	-0.00864453	-0.512394	0.996654	0.567864	0.406229	0.358786	0.142862	0.977745	1.19306	0.968973	1.24356	1.08858	0.890372	1.01419	1.05433	1.08885	1.34971	1.02294	1.17989	1.28431	0.892378	1.10947	0.63611
ENSMUSG00000026463	Atp2b4	H	0.263692	0.0880501	0.210058	0.533459	0.177641	0.179141	0.219215	0.316353	0.24004	0.204588	0.188983	0.353762	0.291821	0.333939	0.161474	0.253771	1.77466	1.66437	1.96905	1.70454	1.52255	1.67019	1.78725	1.61582	1.56413	1.44161	1.948	1.50634	1.63924	1.62173	1.69269	-0.831427	-0.799537	-0.309973	-0.478617	-0.412407	-0.563873	-0.123475	-0.704181	-0.301258	-0.734901	-0.818835	-1.2055	-0.356887	-0.985572	-0.759231	0.721795
ENSMUSG00000048826	Dact2	H	0.332642	-0.122729	-0.274025	-0.244637	0.15408	-0.388413	-0.172915	-0.227228	-0.272503	-0.124675	-0.264816	-0.151236	-0.168803	-0.238697	-0.301159	-0.316419	0.713538	0.906366	0.645108	1.0628	0.206587	0.188156	0.665421	0.737146	0.770834	0.573428	0.777589	0.73095	1.12838	0.843232	0.87233	0.056324	0.0108839	-0.268938	0.0715537	0.0846265	0.231265	0.254736	0.126101	0.133978	-0.108058	0.199059	-0.134528	0.0207056	0.130115	0.154323	1.34156
ENSMUSG00000024598	Fbn2	H	0.0503973	0.316911	0.699911	1.24976	0.181246	0.528384	0.496115	1.0595	0.729462	0.674279	0.176298	0.510499	0.196555	-0.0746694	0.579102	-0.176932	-0.953101	-0.0272986	0.207428	-0.0798547	0.85368	-0.0338478	-0.911016	1.08717	-0.00790608	-0.351576	-0.405146	0.0455463	-0.451599	0.240986	0.178569	0.871421	1.33652	1.08732	1.16123	1.12672	1.19029	1.17579	1.24607	1.05451	1.32068	1.06505	1.36839	1.13866	1.28422	1.25383	0.241705
ENSMUSG00000003411	Rab3b	H	0.586258	0.76593	1.00535	0.493023	0.919673	0.901887	0.700498	0.380358	0.452457	0.676239	0.534529	0.557	0.313379	0.408558	0.363785	0.556266	0.658432	0.788964	0.454086	0.621133	0.303125	0.192021	0.714813	0.345239	0.620119	0.51893	0.595114	0.765406	0.631327	0.442194	0.557649	0.395276	0.18408	0.282233	0.356109	0.208204	0.477764	0.516813	0.163206	0.38716	0.339328	0.209905	-0.0950094	0.211219	0.161795	0.402464	0.347728
ENSMUSG00000020599	Rgs9	H	1.28289	1.46755	1.429	1.69145	1.27486	1.65656	1.49099	1.73807	1.42116	1.44844	1.50803	1.35894	1.50139	1.39852	1.42864	1.37215	0.237967	1.04725	0.367885	-0.206479	0.854774	0.801838	0.14353	0.680044	1.20991	1.09283	0.309424	0.515567	0.535499	0.235845	0.35899	-0.0584242	-0.0999183	-0.267475	-0.16549	-0.199864	-0.0841755	-0.166732	-0.198369	-0.188379	-0.157631	-0.224452	-0.322706	-0.0566182	-0.121348	-0.0466765	-0.152008
ENSMUSG00000036578	Fxyd7	H	0.238928	0.157106	-0.0385598	0.272205	0.540396	0.273652	0.0657053	0.148965	-0.00236302	0.4346	0.172725	0.0479312	-0.130628	-0.0784735	0.228617	0.00620295	0.623667	0.507692	0.35201	0.794472	0.448654	0.43704	0.484771	0.550217	0.990761	0.500082	0.416021	0.546904	0.901035	0.42909	0.955809	0.158107	-0.291667	-0.0723613	-0.078872	0.160656	0.0304134	0.241084	0.22926	0.0479888	-0.145227	0.132141	-0.0113318	-0.106267	0.0749005	0.0300149	1.1318
ENSMUSG00000052301	Doc2a	H	0.73667	1.08291	0.749495	1.02595	0.798438	0.93214	0.560672	0.485832	0.553085	0.871871	0.73791	0.729502	0.766648	0.699271	0.730739	0.772403	0.701873	1.01655	0.814112	1.02818	0.896613	0.92105	0.694556	0.848751	1.36472	0.924005	1.35495	1.19077	1.23011	1.20869	0.935391	-0.652534	-0.83767	-0.853908	-0.413807	-0.609544	-0.445423	-0.605871	-0.645875	-0.296254	-0.521517	-0.535499	-0.925621	-0.583568	-0.456235	-0.39242	0.786684
ENSMUSG00000053111	Fank1	H	1.34643	1.36182	1.35269	0.685768	1.49575	1.28795	1.31213	0.631936	0.880091	0.992546	1.07933	1.03303	1.04416	1.14995	0.710298	0.502453	0.664218	0.746946	0.828895	0.410368	0.081474	1.49946	0.572676	1.03725	0.747115	0.688775	0.654866	0.97842	0.677845	1.12203	1.20886	0.118539	0.167669	-0.153925	-0.0419483	-0.11403	-0.156198	0.355347	-0.303267	-0.244096	0.254546	-0.148749	-0.278547	0.660077	-0.156691	0.208166	0.289494
ENSMUSG00000059213	Ddn	I	-1.97959	-2.19952	-2.46865	-2.33688	-2.05027	-1.69562	-2.16519	-2.09706	-2.64341	-2.46287	-2.39414	-2.31024	-2.43222	-2.43342	-2.39427	-2.50252	3.56057	3.08683	3.43036	3.35693	3.2893	3.26269	3.09388	3.42441	2.76726	3.2734	2.87419	3.1292	3.27328	3.20535	3.21714	3.74776	3.60595	3.49979	3.61005	3.41555	3.58936	3.38116	3.57586	3.70151	3.83866	3.59065	3.65336	3.54856	3.61999	3.79014	2.43331
ENSMUSG00000020950	Foxg1	I	-1.76392	-3.23222	-1.04982	-2.90091	-0.764741	-1.55084	-1.83617	-3.2919	-2.59816	-3.50559	-2.80024	-1.32222	-3.25239	-1.06758	-2.79867	-2.95223	2.29273	2.24396	2.2325	2.37946	2.11868	2.247	2.04243	2.36631	2.32508	2.32837	2.43649	2.3253	2.47332	2.45086	2.28893	3.03369	3.27248	3.26263	3.2857	3.07595	3.23228	3.18936	3.08462	3.1496	3.08708	3.28663	3.02468	3.0386	2.99394	3.06992	2.74974
ENSMUSG00000053310	Nrgn	I	-0.889386	-1.27644	-1.50419	-1.57637	-0.988523	-1.04448	-1.4175	-1.4153	-1.50161	-1.5704	-1.38176	-1.47287	-1.34647	-1.30569	-1.51308	-1.43641	1.85414	1.72304	1.96847	2.07962	1.8258	1.87219	1.80504	1.89758	2.24575	2.06475	2.19079	1.81138	2.19825	2.03991	1.86652	2.21163	2.25671	2.1852	2.25731	2.15915	2.22235	2.22874	2.16705	2.3513	2.36942	2.44557	2.26935	2.03527	2.3893	2.283	2.89518
ENSMUSG00000050896	Rtn4rl2	I	-2.71619	-4.87311	-4.17075	-4.87311	-4.87311	-1.59669	-3.88028	-4.87311	-4.87311	-3.59906	-3.9687	-4.0226	-3.88974	-4.4184	-3.68861	-3.41836	2.97307	2.72994	2.65386	3.16485	2.27174	2.04406	2.63205	2.23976	3.10783	2.33085	3.07998	3.0846	3.0035	3.11844	2.67299	2.52199	2.70186	2.46665	2.87651	2.44952	2.94496	2.31041	2.64372	2.69776	2.79144	2.90196	2.34647	2.50912	2.80541	2.78156	2.46627
ENSMUSG00000034796	Cpne7	I	1.28793	1.34242	0.823154	1.13957	1.23019	1.40002	0.874566	0.687828	0.775504	0.965053	0.881989	0.829446	0.679862	0.628411	1.07263	0.618559	2.38092	1.58369	2.19697	1.63514	1.61699	2.48998	1.28885	1.72568	2.03349	1.73153	1.45312	1.97514	1.46286	2.34638	2.3178	2.32026	2.79838	2.7938	3.07414	2.35076	3.18167	2.93025	2.28009	2.74773	2.92158	2.59	2.34403	3.11645	2.77723	3.04161	-0.00972891
ENSMUSG00000032174	Icam5	I	-0.220226	-0.516744	-0.812556	-0.886669	-0.616477	-0.280631	-0.663397	-0.738292	-1.02141	-0.842797	-0.736436	-1.07883	-1.01363	-1.02181	-1.24783	-1.04451	2.4248	2.37964	2.48565	2.5008	1.97675	2.15115	2.16548	2.21967	2.38937	2.33162	2.61376	2.36141	2.51514	2.61076	2.40985	2.40472	2.44318	2.32798	2.59158	2.38447	2.57107	2.22453	2.52375	2.53375	2.61179	2.66065	2.26382	2.38235	2.59718	2.57965	1.48209
ENSMUSG00000032773	Chrm1	I	-1.46474	-1.11806	-1.27943	-0.952689	-1.55684	-1.09321	-1.2746	-1.27806	-1.6735	-1.24705	-1.30577	-1.5347	-1.17798	-1.35806	-1.5154	-1.82208	2.38644	2.24282	2.18466	2.15547	2.18094	1.71361	2.28047	1.95716	2.25583	2.08208	2.59594	2.23516	2.37259	2.3002	2.09388	2.42674	2.62115	2.54861	2.59039	2.68139	2.67923	2.39415	2.71786	2.57205	2.66694	2.72987	2.50063	2.56747	2.68008	2.75432	2.09051
ENSMUSG00000030905	Crym	I	-1.45878	-1.4367	-1.54885	-2.95712	-0.940591	-0.125397	-1.03242	-0.939686	-1.18412	-1.28192	-1.98015	-2.09262	-1.60085	-1.88477	-1.93741	-1.79205	2.77283	1.98183	2.35295	2.31208	1.98872	2.18085	2.00761	2.35078	1.48167	2.10507	2.41871	2.26643	2.10058	2.28988	2.2466	3.02556	3.21329	3.41225	3.58198	3.31104	3.65665	3.1985	3.27898	3.4032	3.42011	3.48744	2.86733	3.54043	3.31172	3.46925	1.13125
ENSMUSG00000022342	Kcnv1	I	-1.69002	-1.01362	-0.524061	-0.468761	-1.29084	-0.962801	-0.738189	-0.950254	-0.732509	-1.27297	-0.596336	-0.738437	-0.461515	-0.574892	-0.654187	-0.598324	2.16149	2.76065	2.46263	2.60135	2.47704	1.8656	2.50939	2.8143	2.1619	1.89103	2.96813	2.21499	2.78191	2.45328	2.35767	1.13727	1.46816	1.66315	1.53844	1.35534	1.27885	1.67688	1.36808	1.33729	1.15009	1.46657	1.43469	1.56667	1.10999	1.30347	3.10629
ENSMUSG00000058624	Gda	I	0.506462	0.466715	0.765245	0.953587	0.449067	0.935199	0.705726	0.595598	0.378173	0.624883	0.760515	0.983775	1.05888	0.878109	0.660826	0.70856	2.3008	2.26438	2.4237	2.24301	2.30289	2.20605	2.35082	2.15419	1.78461	1.78962	2.55494	2.00312	2.18655	2.19155	2.25247	1.29517	1.6677	1.80973	1.77652	1.64203	1.59784	1.70872	1.46669	1.59843	1.51055	1.51642	1.2619	1.65084	1.29477	1.5308	1.81854
ENSMUSG00000000247	Lhx2	I	-0.491262	-0.897449	-0.707308	-1.56029	-0.648784	-0.920381	-1.05293	-0.759138	-1.25505	-1.03869	-1.12763	-1.24266	-1.08359	-1.07628	-1.32429	-1.14304	2.63012	2.06754	2.46844	2.54151	2.19225	2.25369	2.19001	2.45271	2.01649	2.41301	2.01226	2.46459	2.52432	2.52118	2.32703	2.26316	2.2257	2.25917	2.28617	1.98653	2.26781	2.2076	2.19607	2.30041	2.22972	2.14689	2.20284	2.1667	2.21811	2.25557	2.02724
ENSMUSG00000033730	Egr3	I	-2.56113	-1.60428	-2.84755	-1.55675	-2.40815	-1.85674	-2.55311	-2.32662	-2.40045	-2.1995	-3.20868	-2.95143	-2.43225	-2.6486	-2.6711	-4.24601	2.57045	2.63965	2.12831	2.74029	2.19985	1.69081	2.59435	2.35812	2.56614	2.01988	2.57287	2.34897	2.57841	2.13008	2.42956	2.13427	2.0373	1.96251	2.16218	2.2094	2.29197	2.07849	2.32937	2.07881	1.91432	2.26684	2.1031	1.8669	2.28576	2.10223	2.92149
ENSMUSG00000037579	Kcnh3	I	-3.57214	-2.9974	-3.10503	-2.6838	-2.63962	-2.09753	-2.7728	-3.15282	-3.42107	-2.59464	-2.92395	-3.10514	-3.13	-2.96985	-3.81949	-4.26681	2.83177	2.57499	2.50234	2.66725	2.42465	2.17609	2.42631	2.50963	2.5992	2.50125	2.49758	2.63797	2.69451	2.66839	2.52543	1.68356	1.6782	1.38481	1.72173	1.61733	1.72953	1.3794	1.67539	1.7148	1.89034	1.77082	1.58048	1.68661	1.73768	1.82674	2.71182
ENSMUSG00000035033	Tbr1	I	-2.52528	-3.22231	-2.12213	-1.63893	-2.45553	-2.43233	-2.06056	-1.88542	-2.54419	-2.51849	-3.43379	-1.47656	-3.12739	-2.37043	-2.75689	-2.63744	2.14863	2.55321	2.02857	2.39839	2.13546	1.41122	2.64821	2.37378	2.5323	1.77719	2.78998	2.23695	2.83224	2.5027	2.18499	1.4356	1.64077	1.83545	1.739	1.8151	1.68907	1.93934	1.66094	1.63485	1.89683	1.62308	1.58903	1.51689	1.55378	1.4662	3.12339
ENSMUSG00000052087	Rgs14	I	-0.462961	-0.627644	-0.682177	-0.471867	-0.585468	-0.647663	-0.814647	-0.581801	-1.08446	-0.713177	-0.89619	-0.793023	-0.87452	-1.07396	-0.787113	-1.41364	2.33079	2.22799	2.11122	2.5702	2.28726	1.79874	2.21674	2.20289	2.54575	2.12041	2.32365	2.17598	2.20729	2.50144	2.10549	2.7087	2.6117	2.53308	2.65032	2.67285	2.7024	2.24408	2.80815	2.70163	2.71728	2.6995	2.72227	2.53396	2.62557	3.04917	1.1003
ENSMUSG00000044216	Kcnj4	I	-0.650848	-1.973	-1.39026	-1.98808	-1.58049	-1.28648	-1.42682	-1.37417	-1.94554	-1.51844	-2.12468	-2.09066	-1.78921	-1.60143	-1.89271	-1.92049	2.60129	2.61182	2.2312	2.71158	2.23438	1.61566	2.46409	2.49027	2.71803	2.40336	2.72859	2.57839	2.81602	2.55196	2.53074	1.26328	1.2649	1.12935	1.1878	1.40925	1.1902	1.26821	1.43308	1.31355	1.58742	1.52865	1.11205	1.21876	1.38629	1.47139	2.1052
ENSMUSG00000033726	Emx1	I	-3.91594	-2.65289	-2.28809	-3.91594	-2.95514	-3.3203	-3.18471	-1.65653	-3.91594	-3.68046	-3.91594	-3.91594	-1.94096	-3.67075	-3.91594	-3.91594	1.84813	2.23024	2.00457	2.33587	1.99291	1.55328	1.8391	2.05194	1.59703	2.0725	1.79225	2.09253	2.23025	2.20885	2.23773	1.84774	1.70441	1.80947	2.08233	1.94829	2.01359	2.00705	2.26059	1.99733	1.85584	2.05917	1.86219	1.90261	2.03064	2.04011	2.9243
ENSMUSG00000034209	Rasl10a	I	-2.20622	-1.62458	-1.80906	-3.36427	-2.13343	-1.12445	-2.26705	-1.87331	-2.30009	-1.91402	-2.03299	-2.36729	-2.63099	-2.57282	-2.12214	-2.83893	2.49279	2.37727	1.89429	2.61915	2.25415	1.44803	2.40706	2.51945	2.69263	1.83833	2.38332	2.64938	2.33163	2.24979	2.13165	2.60546	2.39365	2.45109	2.85268	2.33076	2.60382	2.10252	2.63907	2.46684	2.27322	2.5738	2.16078	1.98633	2.76508	2.54558	1.59551
ENSMUSG00000019772	Vip	I	0.618	-0.386929	0.453609	0.263145	0.469335	0.868864	0.759924	-1.85887	0.710605	0.31779	-1.55434	0.489751	0.783604	1.39925	0.756484	0.155334	1.58056	1.72791	1.55826	1.67695	1.74324	1.3329	1.59718	1.92485	1.24035	1.35347	1.69652	1.43233	2.03129	1.87435	1.67615	0.759575	0.989291	0.902445	0.694812	0.910668	0.830678	0.76691	0.578702	1.01741	1.1518	0.899635	0.720233	0.639988	0.596284	0.943468	2.50881
ENSMUSG00000050600	Zfp831	I	-0.558325	-0.406352	-0.500991	-0.274632	-0.602399	-0.0917412	-0.469586	-0.827461	-0.546989	-0.534818	-0.433834	-0.431204	-0.261981	-0.176764	-0.805212	-0.507691	2.31667	2.25029	2.22185	1.90011	2.27064	2.07611	2.07958	2.44016	1.81569	1.80944	2.54347	2.00541	1.944	2.04566	1.99439	2.06035	2.25044	2.20508	2.33304	2.21051	2.23256	1.96076	2.29398	2.10821	2.05738	2.02399	1.93683	2.07742	2.23439	2.16864	1.23317
ENSMUSG00000029151	Slc30a3	I	-1.45067	-2.47628	-3.19727	-3.62214	-2.57059	-2.28688	-3.19115	-3.09498	-2.48557	-2.44617	-2.63647	-2.64968	-3.24711	-3.28694	-2.38132	-1.9727	2.84397	2.81661	2.55553	2.86616	2.46958	2.0116	2.54374	2.99114	2.72536	2.3963	3.11213	2.74183	2.91053	2.95545	2.59349	1.6171	1.33085	1.43145	1.29877	1.53053	1.30093	1.248	1.77044	1.60948	1.59759	1.81778	1.35404	1.32794	1.85894	1.68474	1.99131
ENSMUSG00000021743	Fezf2	I	-0.888983	-0.920323	-1.86412	-0.666252	-1.65835	-0.499366	-1.2688	-0.887025	-1.07287	-1.73362	-1.29792	-1.54487	-1.57123	-1.23058	-1.51442	-1.19726	1.7147	0.776508	1.40714	1.18632	0.683902	0.873115	1.28541	1.13867	1.00673	0.485158	1.11883	0.851093	1.39188	1.54172	0.818493	2.38478	2.65428	2.62582	2.75672	2.62376	3.03409	2.55883	2.47103	2.66322	2.90461	2.57726	2.14335	2.63997	2.54361	2.72376	2.20933
ENSMUSG00000078137	Ankrd63	I	-1.5419	-1.53463	-2.39505	-2.23919	-1.00908	-1.21438	-1.92496	-1.38205	-1.68389	-1.59467	-2.36739	-2.23942	-1.63805	-1.36461	-1.8513	-1.94209	2.7687	2.89131	2.69331	2.65599	2.58659	2.28231	2.62684	2.44723	2.92788	2.84589	2.95874	2.68409	2.73587	2.74566	2.59177	1.49378	1.52368	1.39412	1.65834	1.43743	1.87973	1.35914	1.54197	1.59238	1.84463	1.34213	1.28589	1.75947	1.29711	1.68392	1.48676
ENSMUSG00000004366	Sst	I	1.09527	0.98555	1.03605	0.763789	1.41501	1.09406	1.02082	0.583462	0.539194	0.733705	0.725101	0.516956	0.50079	0.53776	0.520204	0.488198	1.71132	1.44303	1.77822	2.01832	1.63702	1.86448	1.39868	1.36773	1.85462	1.84885	1.98237	1.90434	1.62453	1.8376	1.6169	1.33609	1.34839	1.31977	1.3679	1.14895	1.65531	1.35771	1.2325	1.39541	1.46056	1.4194	0.990367	1.21081	1.37058	1.50238	1.15647
ENSMUSG00000032936	Camkv	I	0.545702	0.517702	0.283886	0.217591	0.575211	0.340996	0.231626	0.0267224	-0.0388528	0.307569	0.173122	0.196637	0.202521	0.0644087	0.162717	0.0487514	1.89736	1.48875	1.74337	1.71313	1.63591	1.70681	1.42457	1.63828	1.65435	1.61924	1.73739	1.69438	1.66163	1.79807	1.67558	1.84594	1.88789	1.76802	2.00994	1.90836	2.03127	1.75579	1.9778	1.96255	2.02277	1.97484	1.72266	1.99489	2.00985	2.14263	1.02842
ENSMUSG00000024008	Cpne5	I	1.06033	1.01467	0.927399	0.493832	1.10711	0.868557	0.617335	0.835552	0.610918	0.744804	0.723146	0.581598	0.442193	0.602507	0.529808	0.759561	1.94489	2.31343	1.9733	2.31749	2.23033	1.62092	2.1054	1.91259	2.551	2.15905	2.48328	2.34874	2.29062	2.20158	2.0656	-0.150635	-0.410466	-0.0116502	-0.141511	-0.104047	-0.11865	-0.197539	-0.082008	0.00833662	-0.179625	-0.151229	-0.43321	-0.265527	-0.0893964	0.0124628	1.88501
ENSMUSG00000021680	Crhbp	I	0.760178	0.40003	0.181995	0.82644	0.503454	0.40466	0.304716	0.844862	0.472686	0.753917	0.543906	0.451811	0.632688	0.404783	0.656585	0.861349	1.43111	1.28525	1.51087	1.57993	1.56305	1.48282	1.10211	1.70268	1.23911	0.622599	1.93126	1.30073	1.27641	1.52309	1.06795	1.77844	1.80981	1.79072	1.40416	1.72127	1.77412	1.60386	1.57733	1.68141	1.68826	1.85583	1.4644	1.67249	1.62399	1.81166	1.38774
ENSMUSG00000059456	Ptk2b	I	-2.39925	-2.34559	-2.59106	-2.16247	-2.16892	-1.72705	-2.20041	-2.56362	-2.7203	-2.13528	-2.28952	-2.40261	-2.35965	-2.62619	-2.01532	-2.514	1.75405	1.89057	1.65568	1.88412	1.61993	1.2706	1.83615	1.73353	1.81296	1.55839	2.21072	1.77991	1.87837	1.91314	1.61339	2.66593	2.75066	2.71023	2.78005	2.8518	2.81675	2.50218	3.01628	2.69719	2.63256	2.96314	2.60527	2.59399	2.95784	2.92141	1.48027
ENSMUSG00000035277	Arx	I	1.26609	0.96467	0.71915	0.87631	0.972191	0.960387	0.388859	0.000456776	0.505706	0.451401	0.700264	0.617632	0.516322	0.6277	0.708121	0.474334	1.3191	1.16627	1.73059	1.69879	1.58862	1.51389	1.37458	1.51805	1.87787	1.92801	1.45342	1.39547	1.54757	1.54943	1.58714	0.944434	0.878931	1.04883	0.946088	1.01965	1.31662	1.13105	0.903775	1.45485	1.43499	0.937274	0.881297	1.1102	0.953813	1.0379	1.33995
ENSMUSG00000055078	Gabra5	I	0.774941	0.624228	0.919923	0.846212	0.853539	0.964439	0.715155	0.743453	0.737693	0.84684	0.876559	0.810856	1.11066	0.835017	0.934992	1.00928	0.368826	0.489912	0.625023	0.505695	0.716724	0.360829	0.573514	0.400255	0.491163	0.616457	0.63612	0.555083	0.551909	0.642718	0.585346	2.41977	2.532	2.52468	2.59631	2.53592	2.43715	2.40849	2.57763	2.49272	2.49288	2.58188	2.49125	2.45749	2.47159	2.56433	0.677615
ENSMUSG00000025020	Slit1	I	1.66089	1.62889	1.41498	1.53459	1.87169	1.56104	1.68399	1.42879	1.36757	1.58662	1.35651	1.41898	1.28588	1.33888	1.14345	1.11995	1.41924	0.7716	1.22484	0.988795	0.780753	0.986311	1.11875	0.858083	1.09963	0.790762	1.41109	1.13993	0.857805	1.18897	1.14135	2.09503	2.25411	2.30129	2.35959	2.37018	2.40026	2.03795	2.51751	2.35358	2.05433	2.45265	2.01896	2.19505	2.4262	2.27457	-0.0328654
ENSMUSG00000027270	Lamp5	I	-1.26334	-1.5949	-1.17343	-1.32558	-0.853301	-0.84247	-1.07784	-1.37794	-1.25921	-1.01996	-1.00559	-1.12901	-1.16737	-1.21062	-1.44679	-0.950845	1.10693	1.55241	1.07573	1.35785	1.12221	1.14861	1.24857	1.28333	1.3586	1.38664	1.53609	1.36122	1.74803	1.38302	1.4187	0.419765	0.31507	0.490626	0.249245	0.63122	0.302396	0.716664	0.505991	0.456664	0.243992	0.484861	0.333852	0.486163	0.580971	0.443248	3.50606
ENSMUSG00000026841	Fibcd1	I	0.0494138	-0.147241	0.133742	-0.397534	0.243046	-0.791339	-0.400818	-0.647345	-0.149148	-0.0351615	-0.0240691	-0.403753	-0.2206	-0.0967102	-0.462464	-0.387365	0.499919	-0.356016	0.241777	-0.0568904	-0.213433	0.0640326	0.007731	0.194206	0.28571	0.140281	-0.41618	0.363164	0.427354	0.692398	-0.136965	3.84982	3.87142	3.48644	4.23156	3.74384	4.2804	3.71415	3.77014	4.02418	4.11201	3.90431	3.585	4.1164	3.85158	4.17445	-0.18535
ENSMUSG00000007207	Stx1a	I	0.010616	-0.0424722	-0.158894	-0.295822	0.0934621	-0.0708857	-0.219665	-0.442097	-0.521261	-0.179757	-0.267038	-0.321617	-0.40629	-0.548663	-0.392573	-0.518333	1.98255	2.01463	1.76528	2.19366	1.83902	1.42484	1.78097	1.99048	1.87055	1.59854	2.11956	2.05393	2.23479	2.14316	1.90963	0.47863	0.376058	0.414114	0.593575	0.550828	0.639553	0.555222	0.578073	0.548568	0.551783	0.544059	0.296959	0.484145	0.59075	0.675438	2.33676
ENSMUSG00000048644	Ctxn1	I	-0.0871481	0.19236	0.041909	-0.280941	0.381971	-0.164758	0.0335596	-0.169911	-0.255821	-0.0462333	-0.142405	-0.211064	-0.225571	-0.240363	-0.433632	-0.31859	1.96151	1.70265	1.87993	2.08952	1.61447	1.55562	1.62283	1.67931	1.74194	1.81826	1.91734	1.89755	1.93674	1.97185	1.80235	1.37841	1.29192	1.21431	1.47179	1.35389	1.56917	1.35728	1.4355	1.44853	1.6125	1.41016	1.2264	1.32019	1.44846	1.54983	1.51176
320038	NA	I	-1.23891	-0.434324	-0.409592	0.0834203	-1.5427	-0.344991	-0.119487	-1.57116	-0.446377	-0.300213	-0.419447	0.221111	0.246862	0.0332625	-0.720468	-0.432465	1.86134	1.72704	1.49787	1.21225	1.64785	1.5983	1.72872	1.42796	0.795852	1.53731	1.43683	1.1196	1.3815	1.71388	1.4183	1.55279	1.94536	2.10498	1.70323	1.52301	1.54205	1.90402	1.54854	1.84464	1.27787	1.41115	1.92082	1.6391	1.70219	1.49427	1.33854
ENSMUSG00000074575	Kcng1	I	-2.96628	-1.38432	-0.762838	-1.24205	-0.925076	0.0149339	-1.26948	-0.32575	-1.35775	-0.894339	-1.06346	-1.28751	-1.18295	-0.775989	-1.31804	-1.61438	2.82269	2.45275	2.6724	2.63014	2.16143	2.24205	2.48205	1.93748	2.39321	1.83913	2.94915	2.59228	2.42691	2.64165	1.83816	1.50749	1.90015	2.11711	2.40764	1.80082	2.38755	1.84749	1.82866	2.28743	1.80887	1.73198	1.3098	1.87019	2.06403	2.1161	1.04845
ENSMUSG00000094910	D430019H16Rik	I	0.95662	0.921605	1.13357	1.03003	1.1003	1.06436	1.19835	1.07711	0.964945	1.17441	1.03269	0.943129	1.02276	1.04472	0.894613	0.978	2.08802	1.69639	2.00819	1.73149	2.07765	1.81096	1.87702	1.79588	1.48294	1.92266	1.61235	1.87139	1.65005	1.63471	1.66862	1.31551	1.30121	1.34854	1.38431	1.24163	1.39872	1.05035	1.43935	1.42116	1.38007	1.25635	1.16736	1.47699	1.374	1.51771	0.561168
ENSMUSG00000048251	Bcl11b	I	-0.785859	-1.24319	-1.13579	-1.07739	-1.19578	-0.728645	-1.01511	-0.987285	-1.15129	-1.21663	-0.871357	-1.31581	-0.937194	-1.08665	-1.37413	-1.16116	2.08152	2.00653	1.90809	1.92758	1.7731	1.64953	2.09818	1.78996	1.91619	2.07201	2.11548	1.86191	1.86543	1.88369	1.8055	2.45451	2.4902	2.53521	2.42907	2.52186	2.2878	2.28741	2.54221	2.46435	2.57829	2.45407	2.45159	2.22942	2.50641	2.52306	0.862117
ENSMUSG00000078591	Hs3st4	I	0.25823	0.367359	0.265507	0.175097	0.281741	0.351927	0.256938	0.281137	0.110691	0.17045	0.407193	0.481556	0.341205	0.295904	0.376386	0.365249	1.21374	1.38975	0.911039	1.3462	1.2889	0.802089	1.46187	1.04273	1.21453	1.14425	1.09857	1.49132	1.31427	1.1652	1.1235	1.78008	1.85139	2.04477	2.03034	1.87428	2.05658	1.92743	2.05891	2.0785	1.84543	1.99855	1.95847	2.02108	1.9963	2.08786	1.39616
ENSMUSG00000051726	Kcnf1	I	-0.0354312	-0.0574772	0.134008	0.11469	0.426253	0.208059	0.136225	-0.0751093	-0.0526414	0.105864	0.0804729	-0.0714482	-0.05629	-0.066094	-0.110068	-0.176241	2.23507	2.28295	1.97278	2.17014	1.8846	1.63087	2.3146	2.08542	2.01909	1.57665	2.47249	2.13748	2.09739	2.00646	1.89779	0.171864	0.659285	0.504262	0.699317	0.658173	0.880631	0.555287	0.448034	0.701773	0.646043	0.457039	0.182825	0.746366	0.493374	0.60263	1.61844
ENSMUSG00000041773	Enc1	I	-0.417841	-0.50835	-0.644419	-0.470966	-0.324142	-0.390076	-0.638736	-0.595354	-0.735597	-0.606609	-0.493065	-0.453723	-0.516832	-0.485603	-0.514195	-0.593265	1.75043	1.83166	1.76933	1.78162	1.59352	1.29842	1.82183	1.59862	1.64091	1.19535	2.21433	1.63363	1.71605	1.6665	1.40558	1.64625	1.8862	1.89319	1.86668	1.96875	1.85346	1.72257	2.01995	1.82825	1.60745	1.9087	1.78941	1.76925	1.93827	1.90597	1.76794
ENSMUSG00000034413	Neurl1b	I	-0.949351	-0.537087	-0.905228	-0.984312	-0.284213	-0.878846	-0.466751	-1.10564	-0.852442	-0.726854	-0.753227	-0.683223	-0.963686	-0.68778	-0.414821	-0.795639	2.41617	2.06399	1.98649	2.14685	2.21224	2.08564	2.25696	1.82779	1.88957	2.12548	1.78893	2.14605	2.16885	2.24043	1.9938	1.29447	1.38472	1.40132	1.76295	1.35045	1.5531	1.20687	1.60987	1.59025	1.52141	1.34279	1.27272	1.58014	1.53577	1.5314	1.50131
ENSMUSG00000019803	Nr2e1	I	-0.511278	0.34883	1.00933	0.506428	0.175953	0.24218	0.455588	0.655069	0.323991	0.614739	0.379169	0.528513	0.528563	0.316377	0.29389	0.258277	1.5921	1.55134	2.06606	1.53253	1.64768	1.89944	2.00448	1.81561	1.54348	2.0791	1.24525	1.78256	1.56705	1.5136	1.82573	1.42347	1.35729	1.47247	1.43246	1.08705	1.28561	1.35776	1.25774	1.41068	1.24073	1.10861	1.37806	1.38752	1.32223	1.43864	1.18497
ENSMUSG00000021803	Cdhr1	I	-2.30522	-0.825313	-0.88347	-0.534584	-0.781405	-0.995174	-0.533436	-0.348038	-0.455109	-0.751868	-0.893171	-0.329875	-0.618676	-1.02963	-0.899293	-1.33631	1.31774	2.06767	1.2449	1.46294	1.38607	0.479816	1.82646	1.56387	1.77249	0.758253	1.39417	1.66173	1.23744	1.21402	0.874433	0.289638	0.32183	0.112579	0.257551	0.547783	0.428889	0.218556	0.387927	0.326059	0.17679	0.427228	-0.344589	0.338351	0.209519	0.150381	-2.2541
ENSMUSG00000032564	Cpne4	I	0.260898	-0.185492	-0.244738	-0.267418	-0.828661	-0.217634	-0.282815	-0.148884	-0.138693	-0.223593	0.0422142	-0.0987607	0.169618	-0.069215	0.139108	-0.115328	1.35315	1.62192	1.27811	1.43212	1.2882	1.04083	1.61683	1.38924	1.30332	1.21468	1.76607	1.18757	1.57197	1.2162	1.25378	1.52603	1.83568	2.13814	2.02254	2.03188	1.84017	1.8809	1.96314	1.79244	1.27156	1.97467	2.03453	1.86569	1.9896	1.83288	1.06161
ENSMUSG00000043969	Emx2	I	-0.858729	-1.39973	-0.393785	-1.72651	-1.57004	-0.687083	-0.628429	-0.264174	-0.654296	-1.50125	-0.916588	-0.775154	-1.15379	-0.779793	-1.18333	-0.767443	1.6124	1.7237	1.28607	1.41394	2.18034	1.66688	1.59298	1.68331	1.36223	1.71072	0.62016	1.5185	1.33932	1.32637	1.63298	2.17712	2.04586	2.14833	2.36218	2.17774	1.85267	2.03848	2.32162	2.28898	2.05936	2.10149	2.1601	2.00127	2.20428	2.13544	1.37609
ENSMUSG00000059187	Fam19a1	I	-0.299687	-0.47914	-0.184576	-0.452371	-0.777913	-0.644426	-0.289364	-0.399891	-0.180344	-0.350963	-0.343456	0.0404661	0.185517	0.0154999	-0.0672866	0.238507	1.82274	1.96553	1.93193	1.96642	1.57994	1.43046	1.64555	2.09112	1.47376	1.18104	2.2867	1.45811	1.87327	1.85507	1.92648	1.40232	1.60588	1.61977	1.78723	1.6548	1.3529	1.58432	1.77328	1.50537	1.49059	1.67113	1.73394	1.49662	1.58363	1.50577	1.47254
ENSMUSG00000022212	Cpne6	I	0.124632	0.105129	-0.0339581	-0.116154	-0.100303	0.0781555	-0.157192	0.00201742	-0.157058	-0.127597	-0.214697	-0.239362	-0.143255	-0.288968	-0.268174	-0.102014	1.41208	1.32297	1.45456	1.51386	1.27219	1.12648	1.25323	1.37336	1.50119	1.01634	1.75211	1.39884	1.25164	1.58445	1.41374	2.06622	2.2449	2.16717	2.31273	2.20146	2.30487	2.1229	2.24698	2.20887	2.1552	2.37018	2.02092	2.25337	2.3729	2.44785	0.285397
111970	NA	I	-1.70218	-1.0275	-0.816873	-0.0531041	-0.0988123	-0.523887	-0.701218	-1.96742	-0.640828	-0.876414	-0.675356	-0.47335	-1.07574	-0.459982	-0.977282	-0.494687	1.5377	1.65262	1.39868	1.40491	1.90473	1.63669	1.788	2.06549	1.5106	1.5333	1.18529	1.65529	1.32453	1.34619	1.41221	1.35535	1.62518	1.60993	1.77566	1.58665	1.49966	1.23477	1.29188	1.48347	1.42597	1.42466	1.39096	1.72687	1.31472	1.73838	1.71259
ENSMUSG00000067879	Vxn	I	-2.17401	-2.14642	-1.79684	-2.33051	-2.16288	-1.82632	-1.79292	-1.93193	-1.89088	-2.04656	-1.94597	-1.75119	-1.78638	-1.59992	-1.95962	-1.81095	1.10941	1.25839	1.08689	1.15106	1.11679	1.14694	0.960822	1.01038	0.801083	0.681628	1.34117	1.04114	1.52502	1.19836	1.25423	1.65443	1.78156	1.68292	1.87552	1.79342	1.75839	1.79412	1.6518	1.8491	1.96892	1.71206	1.587	1.80394	1.40763	1.80109	2.84626
ENSMUSG00000025221	Kcnip2	I	-0.313568	-0.654259	-0.559907	-0.543787	-0.684469	-0.18026	-0.790485	-1.08825	-0.777079	-0.699052	-1.04164	-0.764886	-0.639315	-0.725562	-0.619773	-0.627129	1.76103	1.13029	1.56379	1.0354	1.3028	1.53659	1.22449	0.941051	1.14797	1.43273	1.33627	1.32325	1.44033	1.47601	1.33715	1.98284	2.00655	1.99726	2.16316	2.1154	2.05419	1.87691	2.18541	2.05794	1.89433	2.17947	1.81583	2.08661	2.25443	2.33226	1.39531
ENSMUSG00000025885	Myo5b	I	-0.320121	-1.05683	-0.10642	-0.375701	-0.895141	-0.494972	-0.263531	0.063891	-0.0609504	-0.15848	-0.837957	-0.500988	-0.130942	-0.453432	-0.507403	-0.361926	2.09029	1.85117	2.10893	1.96633	2.04355	1.62955	2.08744	1.87247	1.87511	1.6274	2.31804	1.92769	1.85908	1.91278	1.72175	2.24309	2.51144	2.44473	2.62896	2.29081	2.56705	2.23933	2.46733	2.30573	1.95597	2.50187	2.14145	2.40505	2.58702	2.31541	-0.0508116
ENSMUSG00000030226	Lmo3	I	-0.284271	-0.0647987	-0.0156979	-0.0370747	-0.0922917	0.134062	0.197616	-0.278493	-0.1464	-0.253624	0.203317	0.0814169	0.251066	0.153763	0.0149835	0.136387	2.20059	2.44841	2.1089	2.23202	2.48074	1.60542	2.60291	2.24134	2.31047	2.03892	2.89272	2.26271	2.11567	2.35917	1.78299	1.51705	1.75717	1.69629	1.69986	1.64831	1.52586	1.54405	1.60176	1.58513	1.77321	1.63097	1.52203	1.48489	1.52208	1.64982	0.448785
ENSMUSG00000051617	Krt9	I	-1.08921	-1.12553	-1.84621	-1.94869	-1.09579	-1.03101	-1.17047	-2.23656	-1.31239	-1.22705	-1.02373	-1.15332	-1.40838	-1.06172	-1.69692	-2.51076	2.48029	2.44847	2.74453	2.6966	2.37718	2.9366	2.11807	2.62746	2.14857	2.51333	2.69238	2.55359	2.57501	2.8912	2.64063	1.61603	1.24954	1.60103	1.21821	1.28622	1.03457	1.70043	1.73668	1.60845	1.59224	1.82368	0.788572	1.19144	1.52222	2.01466	0.803374
ENSMUSG00000049281	Scn3b	I	0.445764	0.712665	0.838157	0.878241	0.559775	0.632318	0.692869	0.561905	0.70399	0.738562	0.759581	0.83488	0.793145	0.757941	0.89833	0.891061	1.2993	1.33502	1.1947	1.23971	1.0985	0.908082	1.31316	1.34342	1.09714	0.915462	1.53041	1.189	1.06771	1.19198	1.1681	1.85702	1.95315	1.92717	1.98734	2.23165	1.91552	1.81655	2.25396	2.01122	1.86589	2.14706	1.80372	1.91144	2.0979	2.11256	0.280137
ENSMUSG00000047495	Dlgap2	I	-0.545863	-0.426527	-0.336893	-0.571072	-0.0607841	-0.314922	-0.734759	-0.29024	-0.408975	-0.668559	-0.562934	-0.455945	-0.662409	-0.369178	-0.502886	-0.706459	1.74529	1.87602	1.57616	1.70915	1.6131	1.31813	1.99817	1.76011	1.47689	1.46621	1.90317	1.6404	1.71323	1.42389	1.64326	1.37351	1.54075	1.54361	1.46445	1.60481	1.63285	1.55774	1.5531	1.66125	1.23648	1.34919	1.34393	1.53169	1.52714	1.60987	1.65753
ENSMUSG00000024479	Mal2	I	0.163002	0.0831059	0.159222	0.0328369	0.057831	0.322352	-0.0106825	0.292523	0.357319	0.118221	0.396874	0.645097	0.461357	0.448401	0.528675	0.505079	0.944077	1.07027	1.21068	1.01479	0.921122	0.948094	0.921754	1.24072	0.669762	0.678994	1.25217	0.724352	1.1634	0.937179	0.976284	1.33123	1.6179	1.57868	1.66386	1.62391	1.47043	1.70959	1.41794	1.54244	1.80274	1.54189	1.37214	1.68049	1.27907	1.49725	1.83093
ENSMUSG00000026890	Lhx6	I	-1.13631	-0.539998	-0.0696339	-0.651637	0.188784	-0.251031	-0.705458	-0.317081	-0.490967	-0.916178	-0.552313	0.0548783	-0.970077	-0.50456	-0.300859	-0.220788	1.86304	1.63401	2.12662	1.73605	1.65691	1.63935	1.63546	1.51928	1.96695	2.35252	1.96094	1.64813	1.56233	1.80894	1.7957	1.1273	1.29535	1.51652	1.32491	1.34321	1.51653	1.27021	0.924676	1.40461	1.26373	1.24141	0.707715	1.32031	1.3493	1.30637	1.70255
ENSMUSG00000041708	Mpped1	I	-1.0195	-0.899736	-0.94194	-1.18521	-0.644725	-0.776817	-0.864526	-0.829417	-0.997486	-0.761431	-1.03509	-0.865579	-1.03388	-0.931864	-0.890479	-0.797223	1.43603	1.32532	0.996503	1.25789	1.25746	1.00583	1.17451	1.22794	1.00955	0.969077	1.07676	1.20147	1.48326	1.20488	1.29876	1.71693	1.75582	1.57998	1.88557	1.6404	1.88584	1.64243	1.58061	1.96049	2.07162	1.64097	1.59426	1.88642	1.55482	1.85116	1.95554
330166	NA	I	0.928428	0.881872	0.0432646	1.05844	0.274699	0.849515	0.53561	0.723313	0.606298	0.628855	0.23191	0.405314	0.602918	0.35566	0.357634	0.02145	1.3803	0.9864	1.27878	0.38687	0.902979	1.76234	0.665901	1.49083	1.12112	0.610888	0.69503	1.21813	0.935547	1.51885	1.52614	1.14267	1.57118	1.45042	1.01248	1.11969	1.10409	1.43006	1.27578	1.30688	1.62949	1.22247	1.32314	1.58139	1.59051	1.81806	1.4699
ENSMUSG00000074923	Pak6	I	0.309183	0.30985	0.0309881	0.122013	0.531366	0.296064	0.393996	0.246564	0.23431	0.38209	0.108278	0.0440291	0.20509	0.119743	0.0228059	0.0579826	2.10711	1.73804	1.83836	1.84518	1.82202	1.50481	1.92578	1.72032	1.45763	1.84954	1.57152	1.85208	1.7637	1.72051	1.6308	0.841915	0.873918	0.815118	0.931801	0.76785	0.916871	0.82949	0.74463	0.922408	0.944194	0.746181	0.557152	0.941031	0.77101	0.931234	1.26161
ENSMUSG00000059991	Nptx2	I	0.704565	0.293662	0.472762	0.461359	0.665253	0.324651	0.503308	0.141531	-0.0885005	0.242024	0.455618	0.259309	0.397693	0.129428	0.173756	0.174056	1.94038	2.36175	1.83728	2.25449	1.67994	0.853405	2.18603	2.03615	2.062	1.08975	2.13997	2.19481	1.91754	1.79915	1.82977	0.241163	0.292647	0.106947	0.388331	0.208561	0.618901	0.235391	0.253996	0.603195	0.343648	0.520549	0.382579	0.0194173	0.355416	0.574627	1.46841
ENSMUSG00000021721	Htr1a	I	0.713099	0.60427	0.925304	1.30899	1.01627	0.728803	0.780579	0.481976	0.810322	0.659152	0.88582	0.762188	0.943509	0.865375	0.723192	0.70983	0.665954	0.629326	0.87757	0.781927	1.00291	0.822261	0.703723	0.183657	0.250954	1.04391	0.674083	0.486471	0.727219	0.586775	0.425045	1.8826	1.97006	1.9637	2.17232	2.18985	2.00841	2.08573	2.07236	2.23223	2.09545	2.04781	1.82477	2.06149	1.86011	1.87151	0.924655
ENSMUSG00000046593	Tmem215	I	0.645709	-0.119398	0.435036	-0.305133	0.251841	0.258762	0.12695	-0.0816822	-0.0448558	-0.124395	0.408595	0.181761	0.397928	-0.143331	0.0153225	-0.188182	1.78193	1.83461	1.76759	1.83	1.4492	1.4996	1.9586	1.72912	1.97541	1.46716	2.55889	1.83627	1.49744	1.54512	1.5025	0.0510934	0.438008	1.37386	1.11119	0.847363	0.944635	0.773809	0.593527	0.469713	-0.213242	1.02541	0.0750683	1.17038	0.975911	0.607781	1.71984
ENSMUSG00000059173	Pde1a	I	-0.184463	-0.253989	-0.263302	-0.0399432	-0.51757	0.0749876	-0.352805	-0.317866	-0.286075	-0.295043	-0.0883141	0.00956602	-0.0576538	0.042757	-0.11527	0.126189	1.3574	1.60238	1.62318	1.44924	1.29674	1.28097	1.47703	1.23479	1.24139	1.02425	1.9016	1.39718	1.65877	1.40722	1.19078	1.24112	1.53678	1.82585	1.85047	1.59794	1.74852	1.70307	1.47218	1.63088	1.50236	1.53709	1.29871	1.74935	1.32841	1.5951	1.58472
ENSMUSG00000027978	Prss12	I	-0.9026	-0.507898	-1.2431	-1.63727	-1.04494	-1.08261	-1.16271	-0.655761	-0.682686	-0.429936	-0.585465	-1.19845	-0.647653	-0.566815	-0.787927	-1.05372	1.5338	1.00463	0.703442	1.55513	1.0257	0.765018	0.902159	0.581958	0.999904	1.2078	1.35414	1.57366	1.93247	1.47518	1.06026	1.23914	1.56075	1.72718	1.41625	1.48531	1.61026	1.17715	1.47034	1.41329	1.88457	1.47124	1.22329	1.50651	1.4714	1.58527	1.95833
ENSMUSG00000025370	Cdh9	I	0.275542	-0.188276	-0.112048	-0.153905	-0.624284	-0.206919	0.0546198	-0.00784733	-0.131145	-0.198677	0.296067	0.266464	0.036045	0.372275	0.212978	-0.0863571	1.12369	1.18773	1.77597	1.32731	1.22276	1.39412	1.07767	1.55239	1.12635	0.899904	1.90752	0.917392	1.34075	1.38667	1.03293	1.99454	2.41233	2.41051	2.12175	2.26718	1.75224	1.98643	2.16037	1.98271	1.69705	2.13848	2.04145	1.99979	2.09304	1.96705	0.976678
ENSMUSG00000068859	Sp9	I	1.05102	0.701677	-0.93165	0.144949	1.09446	0.562309	-0.18837	-0.135873	0.333713	-0.0900867	0.159674	0.337639	0.227004	-0.325311	0.527409	0.356821	1.35943	1.8184	1.33088	1.36171	1.43941	1.55028	0.906246	0.431374	1.77941	2.05235	1.54564	1.59965	1.06169	1.81101	1.35179	0.60207	0.386043	0.558853	0.508987	0.245332	0.706182	0.825353	-0.0666978	0.566752	0.632256	0.799989	0.805148	0.894817	0.349363	0.510846	0.0723317
ENSMUSG00000046159	Chrm3	I	0.526634	0.626629	0.152172	0.324796	0.506976	0.329091	0.390253	0.405969	0.589597	0.598544	0.616533	0.60949	0.409473	0.509904	0.628699	0.725801	0.253224	0.961078	0.723124	0.862032	0.295285	-0.496259	0.85383	0.148613	0.642474	0.227903	0.942222	0.407337	0.92707	0.544971	0.361791	1.41653	1.41943	1.4688	1.64449	1.69613	1.55289	1.53169	1.752	1.59096	1.1642	1.651	1.45663	1.3522	1.6428	1.50142	1.60472
ENSMUSG00000046093	Hpcal4	I	-0.591965	-0.367634	-0.350865	-0.35359	-0.23859	-0.189347	-0.330528	-0.406284	-0.430198	-0.419525	-0.394067	-0.350819	-0.356452	-0.329408	-0.446933	-0.463267	2.21136	1.86534	2.12832	1.92762	2.15935	1.99189	1.98481	1.99246	1.52317	1.85713	1.81925	1.92061	1.87118	1.83907	1.84116	0.943428	1.19604	1.21798	1.24489	1.00583	1.24463	1.13678	1.01465	1.26935	1.23384	1.05122	0.930259	1.264	1.04173	1.22771	1.21383
ENSMUSG00000109372	Gm19410	I	-0.493969	-0.772874	-0.922727	-1.11692	-0.630653	-0.918518	-1.27667	-0.796564	-0.5119	-0.524475	-1.02599	-1.16279	-0.698524	-1.08642	-1.19146	-0.728233	1.24201	1.30851	1.25932	1.13851	1.27809	0.816845	0.923325	0.736277	1.10065	1.13355	1.28508	1.45354	1.63568	1.58526	1.26144	0.889453	1.34854	0.990756	0.814783	1.26181	0.714999	0.72319	1.08712	0.877333	1.31731	0.81793	0.929978	1.24344	0.768484	0.985483	2.45515
ENSMUSG00000051243	Islr2	I	-0.267678	-0.0866419	-0.349836	-0.956516	-0.113299	-0.292709	-0.509799	-0.11238	-0.595123	-0.359834	-0.504832	-0.467739	-0.910746	-0.368403	-0.465387	-0.690578	1.33998	1.33765	1.05216	1.49591	0.904119	0.681519	1.17848	1.10126	1.74195	1.07172	1.75367	1.45413	1.37555	1.5032	1.20097	1.76201	1.75379	1.87582	2.02372	1.97092	2.03014	1.52053	2.01205	1.90811	1.74433	2.10475	1.55026	1.58793	2.13095	1.91885	0.892941
ENSMUSG00000050321	Neto1	I	-0.0164242	0.0952483	0.16856	0.2501	0.135075	0.503382	0.187518	0.245557	0.0731036	-0.0478389	0.0475775	0.0828234	0.24639	0.145166	-0.00342921	0.245853	1.09469	1.14389	1.16072	0.858824	0.916073	0.931399	1.04371	0.730076	0.819799	0.839171	1.12704	0.723075	1.15079	0.955658	1.04644	1.56229	2.02214	2.19267	2.12366	1.77613	1.96644	1.97302	1.77045	1.94147	1.51063	1.89501	1.49237	2.02154	1.91164	1.74298	1.2422
ENSMUSG00000056306	Sertm1	I	-0.187357	-0.227477	-0.239699	0.0544042	0.0230676	-0.102188	-0.270614	-0.166077	-0.225807	-0.113488	-0.0769789	-0.100714	-0.177024	-0.267679	-0.0221348	-0.00135763	1.64462	0.953001	1.63635	1.20025	0.955332	1.51784	0.81097	1.51629	0.669652	1.07016	1.09161	1.06238	0.970865	1.1671	1.17226	2.09557	2.24046	2.18496	2.25983	2.21372	2.29525	1.93842	2.11974	2.16808	2.28274	2.23436	1.9193	2.03753	2.03087	2.26723	0.400615
ENSMUSG00000028033	Kcnq5	I	0.088239	-0.214675	-0.100541	-0.197635	-0.287288	0.221038	-0.230532	-0.0310442	-0.0362359	-0.0928751	-0.0206151	0.0698995	0.106507	0.0373165	-0.109351	0.0369969	0.525641	1.11186	0.6453	0.653946	0.946802	0.176222	1.15254	0.873311	0.997894	0.560484	1.29786	0.67669	0.903871	0.849909	0.410941	1.01441	1.54671	1.71292	1.71691	1.40995	1.62915	1.49912	1.38377	1.52358	0.933623	1.42473	1.13431	1.50652	1.50222	1.08954	1.81092
ENSMUSG00000028176	Lrrc7	I	-0.417769	-0.179464	-0.190265	-0.190602	0.0787423	-0.127831	-0.0662665	-0.0595368	-0.0279642	-0.240081	-0.0549632	-0.159814	-0.0711312	-0.0998128	0.274041	-0.34498	2.02183	1.8293	1.65789	1.50075	1.84946	1.2924	1.86832	1.33488	1.26827	1.3555	1.62942	1.38393	1.56406	1.40434	1.37594	1.34102	1.74759	1.62726	1.57553	1.61466	1.60191	1.46487	1.54824	1.58103	1.24123	1.35982	1.33693	1.60112	1.48013	1.55514	0.680461
ENSMUSG00000068037	Mas1	J	-4.04871	-3.63825	-3.34528	-4.51797	-4.1224	-2.68783	-3.30378	-2.98491	-4.00881	-3.14185	-3.61357	-4.03093	-1.96084	-3.88035	-2.69191	-4.08692	2.15271	2.39593	1.98707	2.15543	1.89669	1.68744	2.23368	2.02505	1.36708	1.5179	2.43878	2.34323	2.17143	2.36763	2.08053	2.33022	2.64652	2.86143	2.93333	2.82614	2.97319	2.76062	2.87102	2.57	2.48722	2.84054	2.48811	2.50696	2.93932	2.80316	1.3179
ENSMUSG00000032128	Robo3	J	-2.4278	-1.97771	-2.3869	-2.31869	-3.07836	-1.33902	-2.4497	-0.969679	-1.42396	-1.84174	-1.87398	-2.32258	-3.04652	-1.53727	-2.23078	-2.29369	0.668148	1.28445	-0.118956	-0.489326	0.0382373	0.0301075	-0.101173	-0.111167	0.582549	-0.669716	-0.0146597	0.156484	1.02488	0.601735	0.233274	1.84628	2.11926	1.96531	1.39968	2.18679	1.72705	1.9101	2.23242	2.08532	2.11407	2.25386	2.16052	1.45077	2.39477	2.44558	3.24112
ENSMUSG00000037984	Neurod6	J	-2.89985	-3.61608	-3.5529	-2.18692	-3.93704	-3.6214	-3.40981	-3.32079	-3.53769	-3.28959	-3.35924	-3.81906	-3.07131	-3.23319	-3.45595	-3.4625	-0.520981	0.404037	-0.589083	-0.000830773	-0.00935245	0.00707628	-0.496802	-0.641132	0.0410206	-0.866252	0.268776	-0.216491	0.560952	0.0374638	-0.0806595	3.12233	3.31649	3.32558	3.30669	3.35656	3.0995	3.25069	3.28126	3.14564	2.97782	3.33485	3.4216	3.1785	3.17668	3.23377	2.24688
ENSMUSG00000090291	Lrrc10b	J	0.0236124	-0.265934	0.110209	-2.42855	0.369359	-0.0408492	-0.344313	-0.866638	-0.640555	-0.549902	-0.866739	-1.01147	-0.43303	-0.964408	-0.501713	-0.830102	1.15908	1.62968	0.689683	0.747152	1.34541	0.575266	0.587009	1.04101	1.73499	2.3801	0.161141	0.821089	1.41054	0.321265	0.276778	3.3009	3.42221	3.41347	3.3745	3.26977	3.39078	3.00261	3.49854	3.45611	3.44711	3.53212	3.44125	3.02318	3.51594	3.56898	-0.716452
ENSMUSG00000021702	Thbs4	J	-1.2762	-1.90875	-0.768431	-2.34613	-1.76664	-0.526041	-1.43685	-1.26266	-1.86331	-1.31519	-1.42118	-1.9254	-1.4534	-1.45916	-2.19293	-1.43389	1.14338	0.595741	1.11262	0.153377	1.07916	0.74861	-1.21909	1.35026	-0.705342	1.82064	-0.419225	0.721585	1.16161	0.961889	1.45819	2.61042	2.77511	2.48375	2.41009	2.29274	2.71683	2.74081	2.80621	3.01072	3.13843	2.49425	2.84271	2.81566	2.97789	2.34561	1.28549
ENSMUSG00000068744	Psrc1	J	-2.33729	-2.92557	-2.6904	-3.56713	-2.86144	-2.22603	-2.5743	-3.06034	-2.25604	-2.65142	-2.45452	-3.08009	-1.71691	-1.9641	-2.38263	-3.13607	1.98198	0.985761	1.63962	0.871917	0.743381	1.42151	1.25303	1.35364	0.455324	0.844265	1.36426	0.533424	1.3198	1.74831	0.930997	2.11773	2.17671	1.84655	2.27385	2.19792	2.06389	1.73907	2.19227	2.18211	2.25163	2.08937	1.88153	2.09612	2.10093	2.52515	2.25164
ENSMUSG00000020651	Slc26a4	J	-3.4075	-2.76595	-2.37521	-2.33165	-1.72572	-0.57284	-2.99605	-1.58975	-1.58402	-1.76245	-1.24172	-2.02552	-1.55729	-1.56209	-1.71709	-2.37564	0.797241	0.989245	1.13957	0.863314	0.307923	1.22745	0.805395	0.906314	1.37426	0.90463	1.19194	1.2497	0.875548	1.30797	1.00612	2.94409	3.27101	3.25148	3.39597	3.25391	3.13276	3.01793	3.22827	3.15124	2.9773	3.16587	3.2354	3.12097	3.26226	3.10213	0.749171
ENSMUSG00000070564	Ntn5	J	-1.60348	-2.79429	-1.8498	-3.15044	-3.15044	-1.80934	-3.15044	-1.16997	-2.64128	-2.91496	-2.78241	-3.15044	-1.43681	-2.20463	-1.7769	-1.52315	0.507941	0.760794	0.320203	0.451434	-0.539317	0.706735	0.41335	1.01722	0.587899	-0.0552116	-0.615382	0.259744	1.0556	0.94999	-0.796011	2.0327	2.10207	2.1937	2.23443	2.24087	2.07521	1.97372	2.09177	2.22398	2.15589	2.438	1.1243	1.89036	2.10321	1.8015	2.76271
ENSMUSG00000024883	Rin1	J	-2.26326	-2.1065	-2.20533	-1.78951	-2.27686	-1.35671	-2.23349	-2.17244	-2.20047	-2.63627	-1.96783	-2.00012	-2.29075	-2.25817	-2.51228	-2.36596	2.16569	1.81422	1.81962	1.69344	1.74253	1.7682	1.71433	1.79152	1.53411	1.67532	1.819	1.70756	1.81623	1.91271	1.71698	1.76127	1.92081	1.9918	1.93901	1.95389	2.02138	1.83817	2.03635	1.91618	1.98924	1.977	1.83042	1.99384	2.01685	2.26136	1.58789
ENSMUSG00000032487	Ptgs2	J	-1.36653	-2.90505	-2.74731	-1.95154	-4.32508	-2.10913	-3.50645	-1.89225	-2.33322	-3.07559	-2.98741	-2.28309	-2.33273	-2.27542	-2.19128	-2.80007	1.63767	2.27719	1.80429	1.85383	1.85242	1.20841	2.2784	2.24201	1.60416	0.81152	1.74589	2.07348	1.84322	1.53289	1.94517	1.86923	2.54195	2.70157	2.41717	2.37165	2.06403	2.37214	2.3559	2.21917	1.75489	2.59833	2.62693	2.15749	2.38427	2.6052	1.38819
ENSMUSG00000064201	Krt2	J	-2.33986	-1.98371	-1.8359	-2.33986	-2.33986	-0.145138	-2.33986	-2.06433	-2.33986	-1.902	-1.67886	-0.957878	-2.33986	-1.88515	-1.15536	-2.33986	3.19867	1.4086	3.6821	2.31963	1.06352	3.34709	2.36112	2.22818	-0.846427	2.43679	0.100309	2.35244	1.53409	2.57568	2.98502	3.03316	2.78383	2.71968	2.96221	3.06967	2.84192	2.82678	2.83035	3.13252	2.51928	3.04479	2.48873	3.12209	3.06765	2.79505	0.0565621
ENSMUSG00000024617	Camk2a	J	-1.55209	-1.50925	-1.45823	-1.6616	-1.20977	-1.44207	-1.46528	-1.43872	-1.60175	-1.36668	-1.51888	-1.56222	-1.60713	-1.5473	-1.55507	-1.68056	1.98169	1.66651	1.89587	1.76753	1.94103	1.57123	1.82187	1.86913	1.32597	1.72155	1.58642	1.7095	1.81737	1.67406	1.56522	1.92399	1.95578	1.87146	1.8842	1.74553	1.94194	1.6626	1.93982	1.93586	1.93663	1.84341	1.90159	1.86064	1.94021	1.9521	1.46806
ENSMUSG00000032807	Alox12b	J	-0.850905	-0.745058	-3.33963	-3.33963	-1.97376	-1.73339	-2.6084	-2.16161	-0.895007	-1.15503	-1.27045	-2.85259	-1.94541	-1.57058	-2.15513	-2.90858	1.41464	-0.372103	0.523592	0.635141	-0.172269	0.578697	0.584913	0.892485	-0.572002	-1.49409	-0.093952	-0.108794	0.980435	0.415886	-0.0939944	2.38821	2.50982	2.46558	2.59594	2.6511	2.85929	1.85807	2.61608	2.47747	2.47912	2.69714	2.05282	2.22099	2.5626	2.34647	2.00844
ENSMUSG00000028971	Cort	J	-2.988	-1.90392	-2.988	-2.63525	-2.988	-2.39236	-2.25677	0.0019782	-2.27886	-2.37268	-2.327	-2.13749	-2.58126	-2.988	-2.988	-2.988	2.09213	1.1374	1.85678	1.31225	0.579822	1.43118	1.00579	1.15751	1.58951	1.02025	1.63323	1.53917	1.94745	1.52835	1.55855	1.17291	1.28981	1.47562	1.62666	1.28127	1.45362	1.47844	1.74164	1.91037	1.53537	1.98582	1.26885	1.14613	1.52565	1.95169	1.72023
ENSMUSG00000053963	Stum	J	-1.49217	-1.27022	-1.32493	-1.45689	-0.968948	-1.31577	-1.62579	-1.3856	-1.26343	-0.927887	-0.865126	-1.26848	-1.29649	-1.54098	-0.460915	-1.41415	2.02919	1.721	1.9014	1.83576	1.74326	1.61915	1.71458	1.85439	1.43356	1.49907	1.89035	1.63134	1.78927	1.77334	1.76091	2.043	2.21048	2.20368	2.37184	2.17766	2.39957	2.02651	2.25571	2.28402	2.15702	2.22775	2.05617	2.30402	2.27799	2.36147	0.823029
ENSMUSG00000015568	Lpl	J	-1.33002	-1.13766	-1.46867	-1.84877	-1.635	-1.81706	-1.40144	-0.693253	-1.29722	-1.53015	-0.751138	-0.839853	-1.12242	-1.05402	-0.852772	-2.14191	1.61161	1.39028	1.94533	1.58659	1.41007	1.77098	1.47022	1.09701	0.636594	1.38497	1.29914	1.01905	1.56007	1.58161	1.99629	1.83841	2.277	2.40041	2.39505	2.20822	2.18839	2.28917	2.21528	2.11354	1.84583	2.19907	1.95356	2.34749	2.23733	2.21971	0.96973
ENSMUSG00000074345	Tnfaip8l3	J	-0.772513	-0.341303	-0.043608	-0.757599	-1.10153	-0.112551	-0.628439	0.0683037	0.104007	-0.0322684	-0.102922	0.0728059	0.316173	-0.106488	-0.023512	-0.149621	1.2987	1.29052	1.76463	1.55215	1.21188	1.63519	1.58095	1.29171	0.782647	1.47191	1.82186	1.15334	1.34419	0.739103	1.04498	1.9229	2.4786	2.60935	2.71851	2.50965	2.5521	2.45199	2.3939	2.44375	1.96343	2.47588	2.15369	2.48119	2.46106	2.31991	0.356125
[truncated: 109 more rows]
[truncated: 30 more columns]

## Sheet: Cellular Component
Cluster	adj.Pval	nGenes	Pathways	Genes
[truncated: 54 more rows]

## Sheet: Molecular Function
Cluster	adj.Pval	nGenes	Pathways	Genes
[truncated: 56 more rows]

## Sheet: Biological Process
Cluster	adj.Pval	nGenes	Pathways	Genes
[truncated: 87 more rows]

## Sheet: SupplementalTable_KmeansCluster
Cluster	adj.Pval	nGenes	Pathways	Genes
[truncated: 18 more rows]
