# Supplementary material
Source: publisher figshare collection journal article supplement (https://gsajournals.figshare.com/articles/dataset/_/8014703)

## Hypothalamus

KEGG Pathway Enrichment: Genes that are repressed by reproductive experience (higher in virgins)

KEGG:mmu04728 Dopaminergic synapse

Enrichment FDR: 2.81E-09

Genes in list are highlighted in red

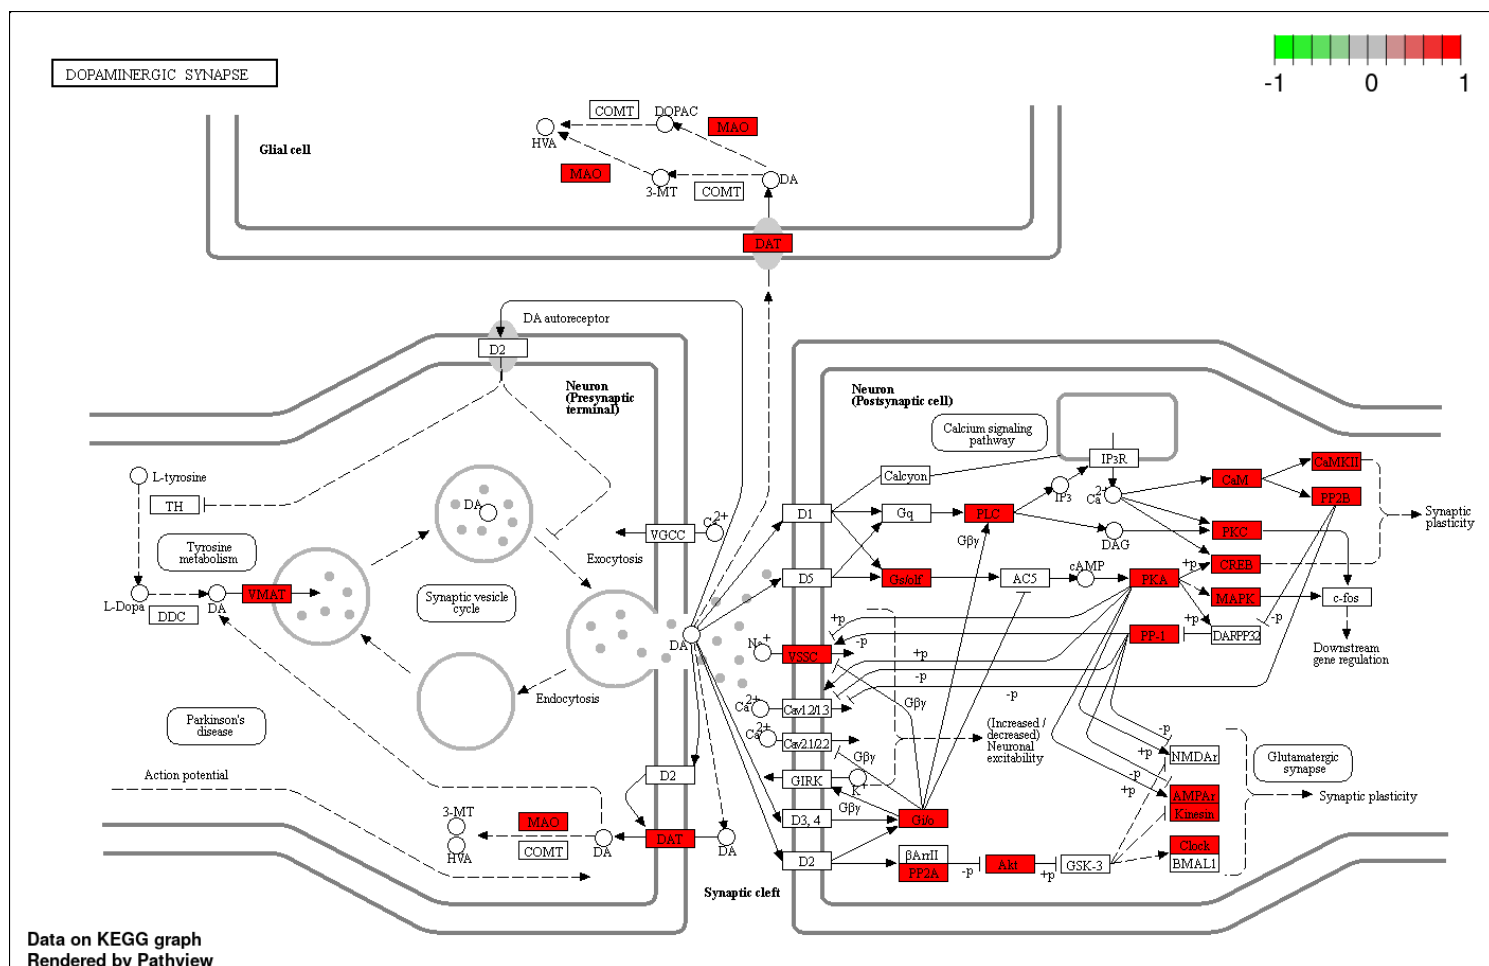

Supplement: Supplementary file 2 [file 1]
